# Supplementary material
Source: PubMed Central journal article supplement (PMC5666621)
Supplement: EMBJ-36-3175-s001.pdf [file EMBJ-36-3175-s001.pdf]

## Appendix files

|                                 |    |
|---------------------------------|----|
| 1. Appendix Figure Legend ----- | 2  |
| 2. Appendix Figure S1 -----     | 6  |
| 3. Appendix Figure S2 -----     | 7  |
| 4. Appendix Figure S3 -----     | 8  |
| 5. Appendix Figure S4 -----     | 9  |
| 6. Appendix Figure S5 -----     | 10 |
| 7. Appendix Figure S6 -----     | 11 |
| 8. Appendix Table S1*-----      | 12 |
| 9. Appendix Table S2*-----      | 18 |
| 10. Appendix Table S3 -----     | 70 |
| 11. Appendix Table S4 -----     | 71 |

\*Appendix Table S1 and S2 can also be found as excel spreadsheets  
in the related Source Data file.

## **Appendix Figure legend**

**Appendix Figure S1. SIRT1 deficient mESCs have reduced expression of a pluripotency marker when cultured in ES cell maintenance media.** WT and SIRT1 KO mESCs cultured in the complete M10 medium were fixed and stained for Nanog. The staining intensity was analyzed by FACS as described in Materials and Methods.

**Appendix Figure S2. Sh-SIRT1 mESCs are sensitive to methionine restriction/depletion induced differentiation.**

(A) Sh-SIRT1 mESCs display enhanced differentiation phenotypes in a methionine free M10 medium. Sh-Control and sh-SIRT1 mESCs were cultured in the complete M10 medium or modified M10 media depleted the indicated nutrients for 48 hours. Bars, 100  $\mu\text{m}$ .

(B) Sh-SIRT1 mESCs are sensitive to methionine restriction induced differentiation and apoptosis. sh-Control and sh-SIRT1 mESCs were cultured in the complete M10 medium (contains 200  $\mu\text{M}$  methionine) or M10 media containing indicated amount of methionine for 48 hours. Bars, 100  $\mu\text{m}$ .

**Appendix Figure S3. The dose effects of methionine on differentiation in WT and SIRT1 KO mESCs.**

(A) WT and KO mESCs were cultured in the complete M10 medium (contains 200  $\mu\text{M}$  methionine) or M10 media containing indicated amount of methionine for 48 hours. Cells were stained for the AP activities. Bars, 100  $\mu\text{m}$ .

(B) SIRT1 KO mESCs displayed marked enhancement in expression of mESC differentiation makers when cultured in M10 media containing 3-6  $\mu$ M methionine. WT and KO mESCs were cultured in indicated M10 media for 48 hours. The mRNA abundance of three ES differentiation markers, *Nestin*, *Cdx1*, and *Cdx2*, were analyzed by qPCR. n=3 independent experiments.

(C) Methionine restriction alone fails to induce significant cell apoptosis in either WT or SIRT1 KO mESCs. WT and SIRT1 KO mESCs cultured in complete medium or methionine restricted medium for 48 hours. n=3 independent experiments.

Data Information: In (B and C), data are presented as mean $\pm$ SEM.

**Appendix Figure S4. Adding back methionine rescues methionine depletion induced loss of pluripotency and apoptosis in SIRT1 KO mESCs.**

(A) WT and KO mESCs were cultured in the complete M10 medium (contains 200  $\mu$ M methionine) for 48 hours, or in M10 media containing no methionine for 24 hours, followed by adding back indicated amount of methionine for additional 24 hours. Cells were stained for the AP activities. Bars, 100  $\mu$ m.

(B) Adding back methionine rescues methionine depletion induced apoptosis in SIRT1 KO mESCs. WT and SIRT1 KO mESCs as in (A) and apoptosis were analyzed as described in Materials and Methods. n=3 independent experiments.

Data Information: In (B), data are presented as mean $\pm$ SEM.

**Appendix Figure S5. SIRT1 induces expression of Mat2a in part through Myc.**

(A) Promoters of *Mat2a* and *Mat2b* genes contain multiple N-Myc and c-Myc binding sites. Promoters of mouse *Mat2a* and *Mat2b* genes were analyzed by software from Biobase, Germany.

(B) Overexpression of Myc but not CNOT3 induces expression of *Mat2a* promoter-driven luciferase activity. Luciferase reporters driven by mouse *Mat2a* promoters containing the putative Myc binding site 1 were co-transfected into HEK293T cells with constructs expressing N-Myc, c-Myc proteins, or CNOT3 (n=3 independent experiments).

(C) Knocking down of N-Myc protein in mESCs blunts the induction of *Mat2a* upon methionine restriction (n=3 independent experiments).

(D) Knocking down of N-Myc protein in mESCs blunts the induction of MAT2A protein upon methionine restriction in mESCs.

(E) Knocking down of N-Myc protein in mESCs induces differentiation morphology in mESCs cultured in M10 medium. Bars, 100  $\mu$ m.

(F) Endogenous c-Myc protein is hyperacetylated in SIRT1 KO mESCs.

Data Information: In (B and C), data are presented as mean $\pm$ SEM. \*p<0.05 (Mann-Whitney test).

**Appendix Figure S6. SIRT1 regulates methionine metabolism, thereby modulating pluripotency of mESCs and mouse embryogenesis.**

Our data indicate that in WT mESCs, SIRT1 deacetylates N-Myc and c-Myc and promotes its recruitment to the promoters of *Mat2* genes, thereby stimulating *Mat2a* and *Mat2b* expression. Increased expression of MAT2 enzyme enhances the



conversion of Met to SAM and increasing biosynthesis of glutathione, which in turn helps to maintain histone methylation, reduce oxidative stress, and inhibit apoptosis. These actions eventually lead to maintenance of mESC and normal embryogenesis. In the SIRT1 KO mESCs, on the other hand, N-Myc and c-Myc proteins are hyperacetylated, resulting in reduced recruitment of N- and c-Myc to the Mat2a and Mat2b promoters and reduced expression of MAT2 enzyme. The decreased conversion of Met to SAM and reduced production of glutathione further impair histone methylation, increase oxidative stress and enhance apoptosis, inducing differentiation and death of mESCs and causing defective embryogenesis.

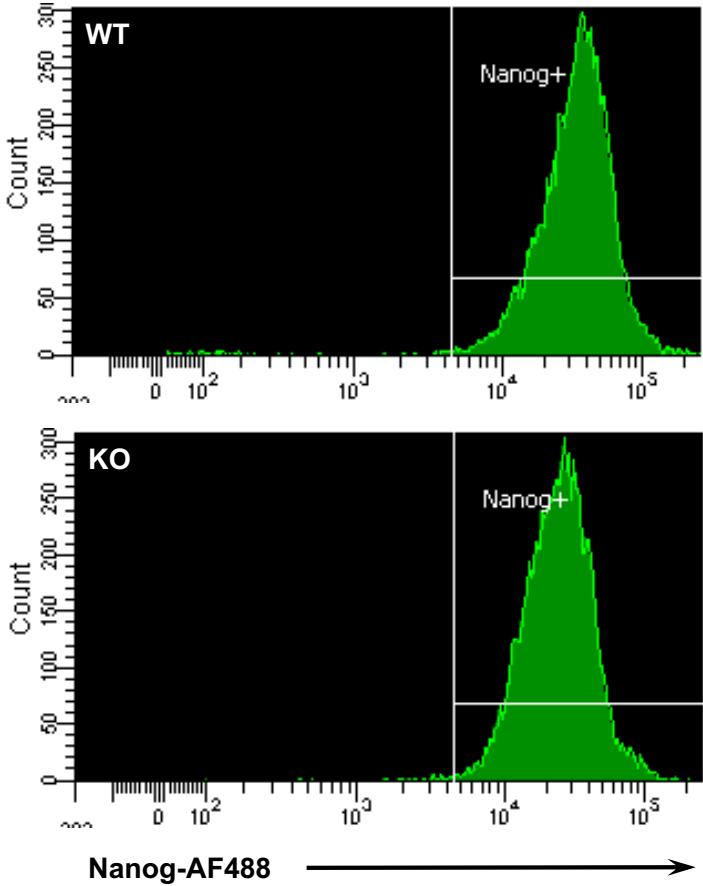

**A**

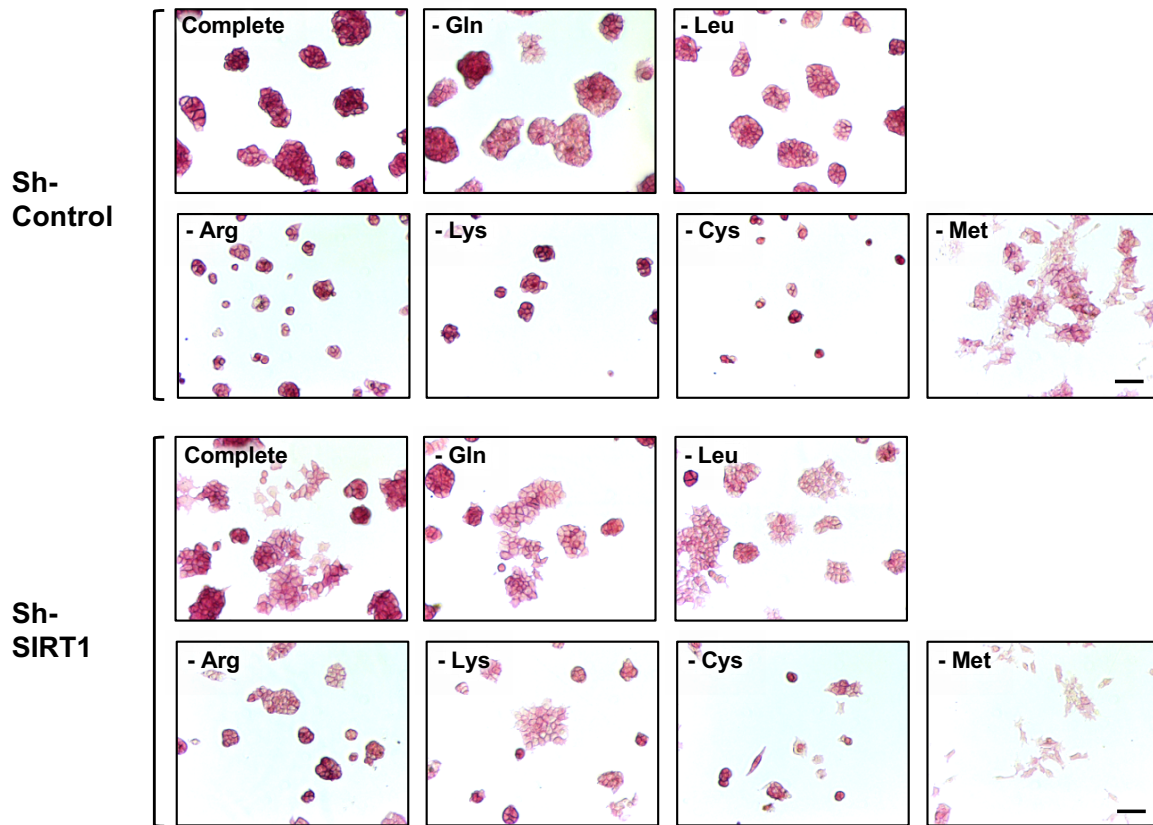

**B**

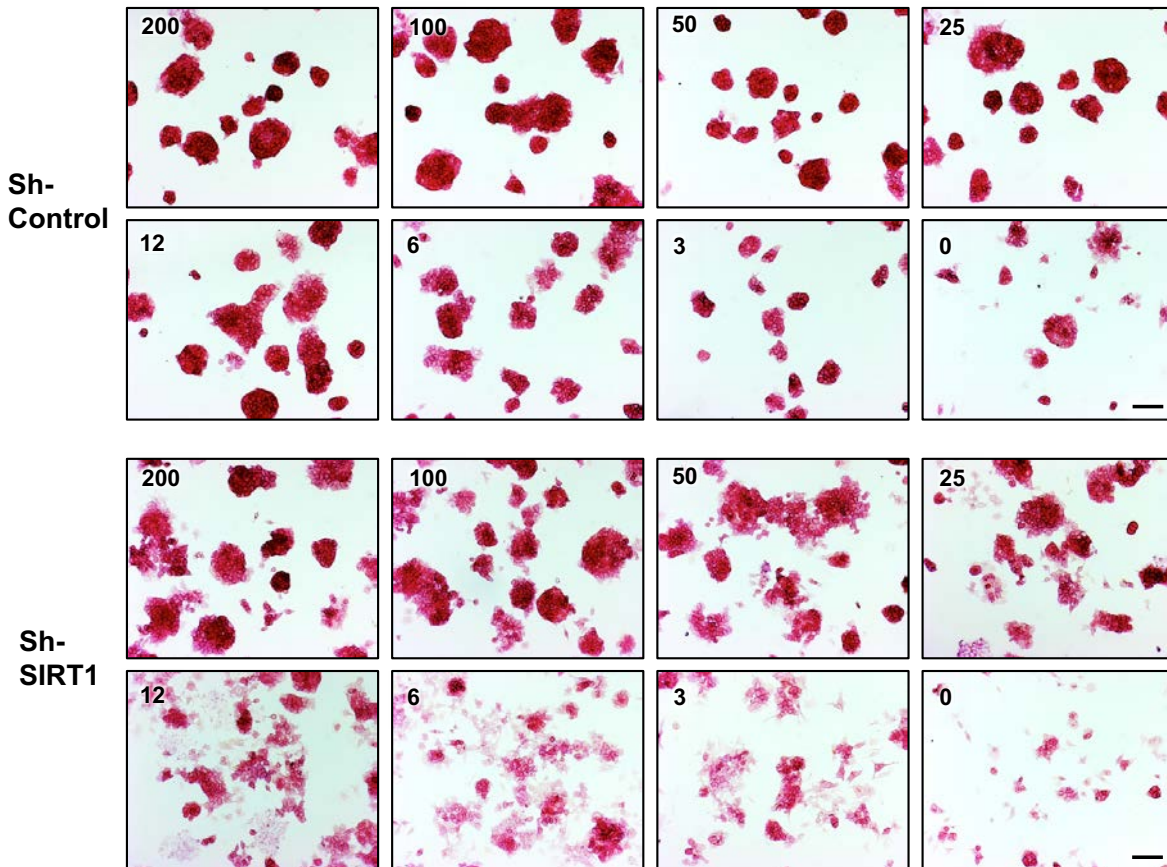

**A**

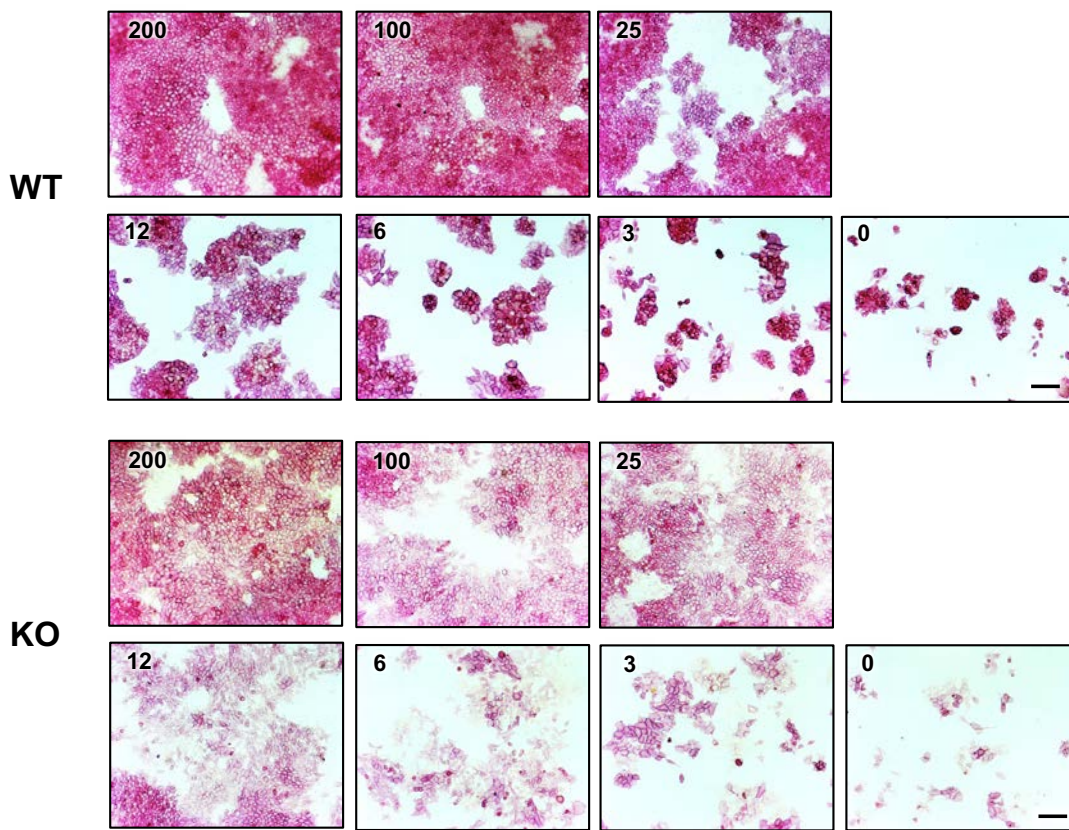

**B**

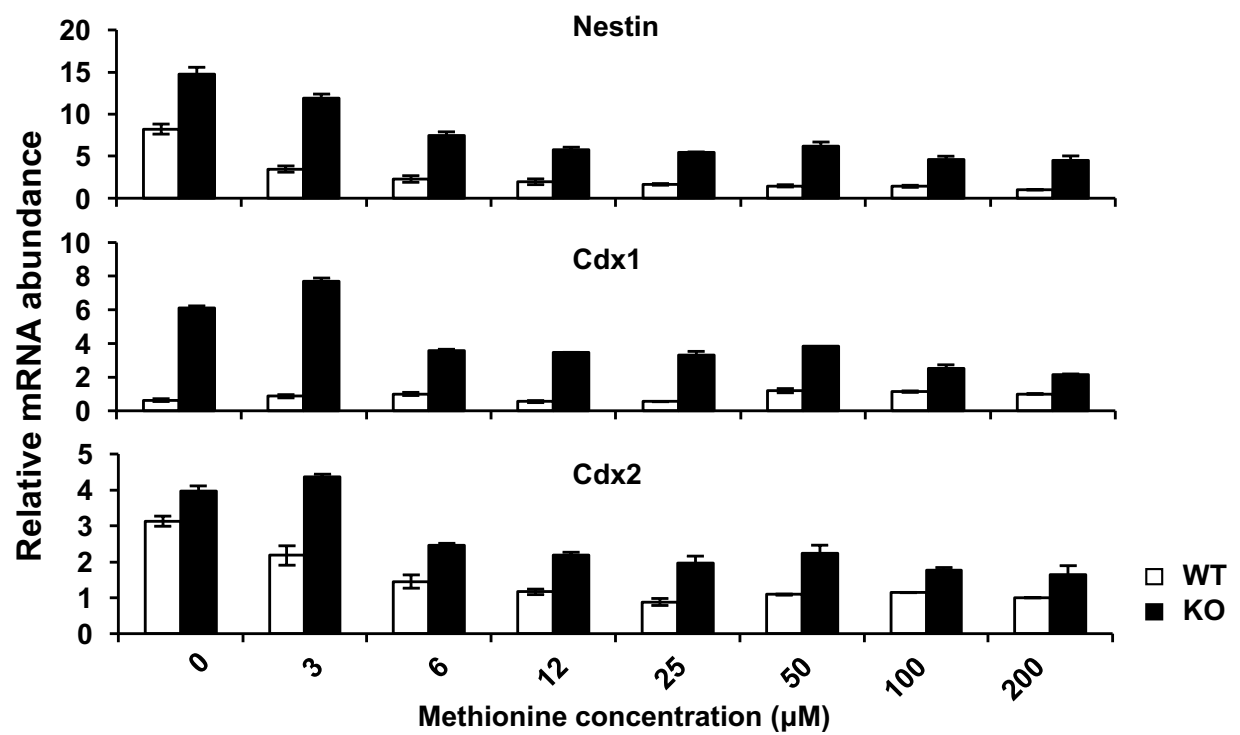

**C**

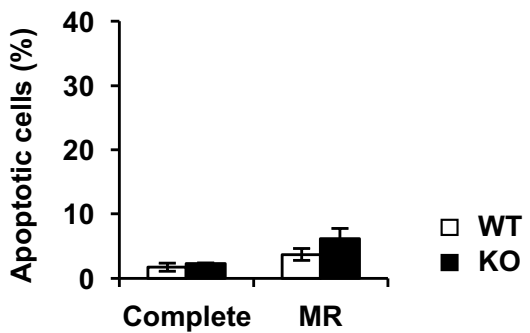

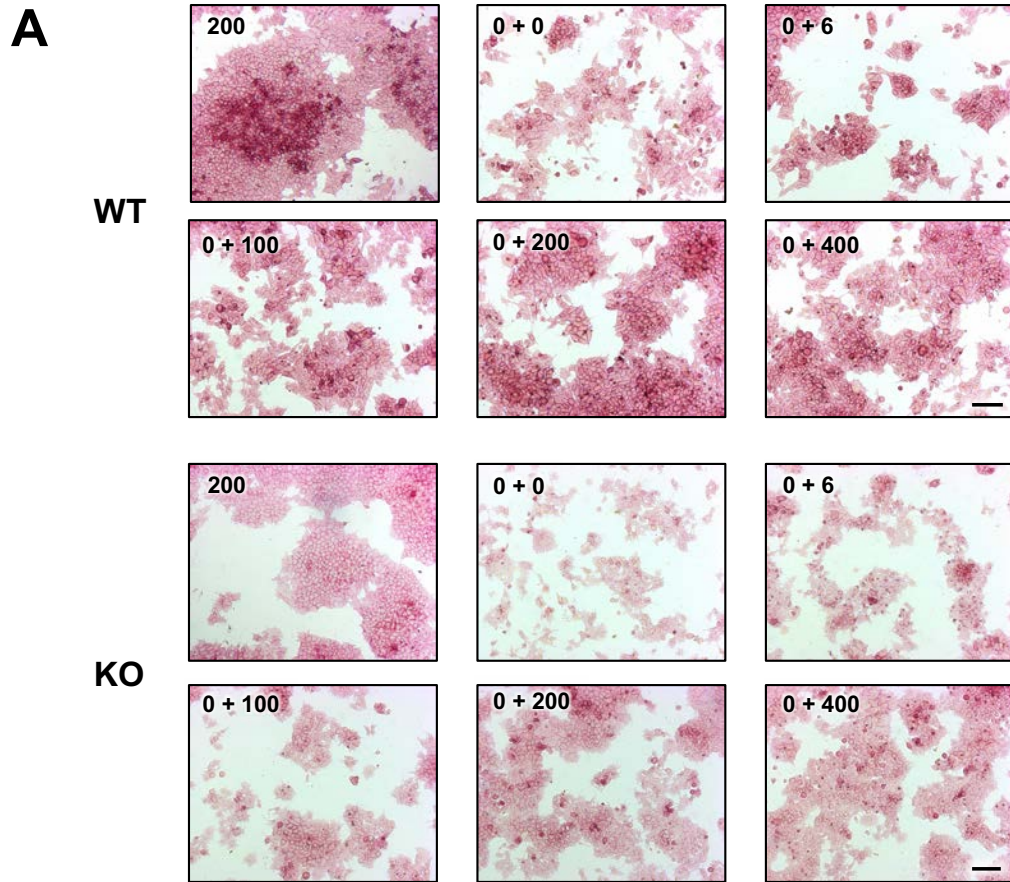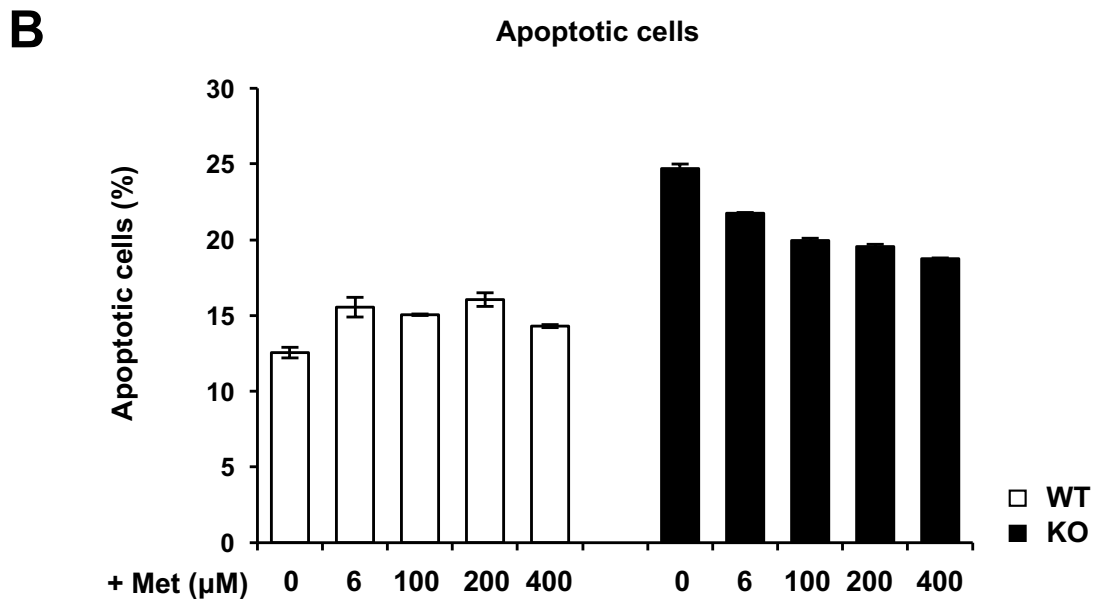



**A**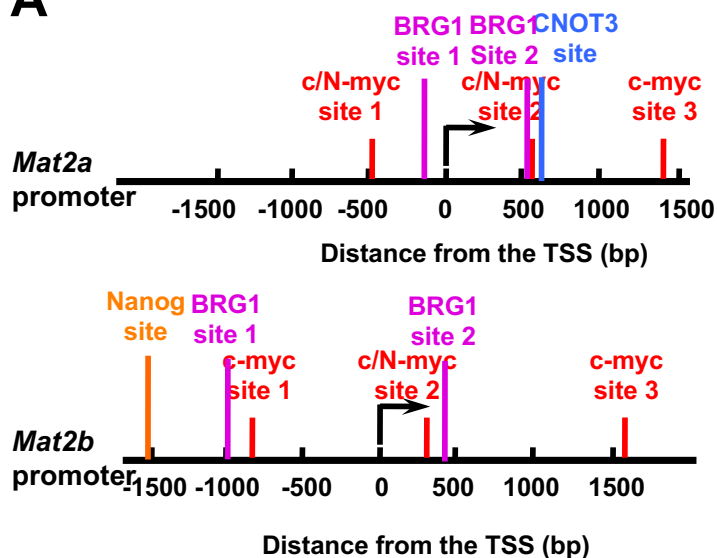**B**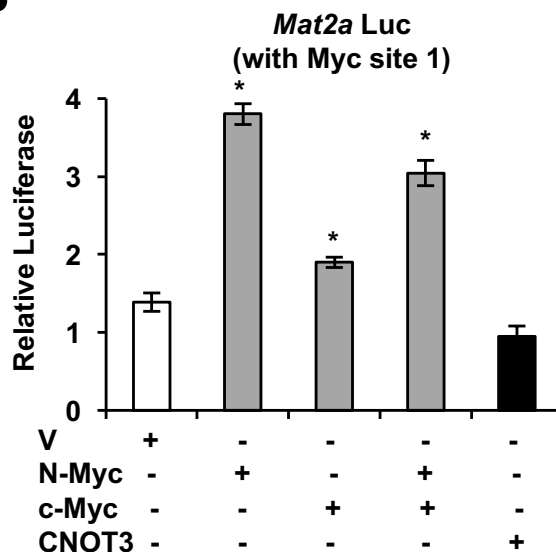**C**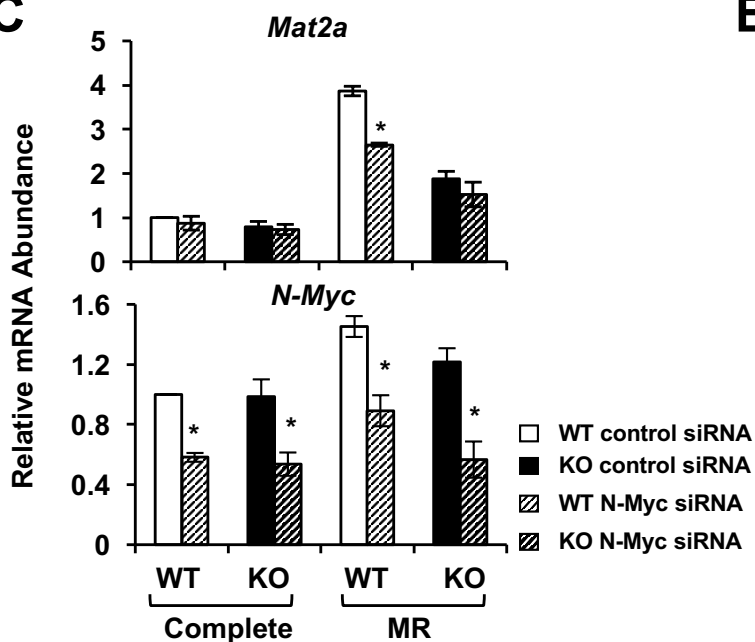**E**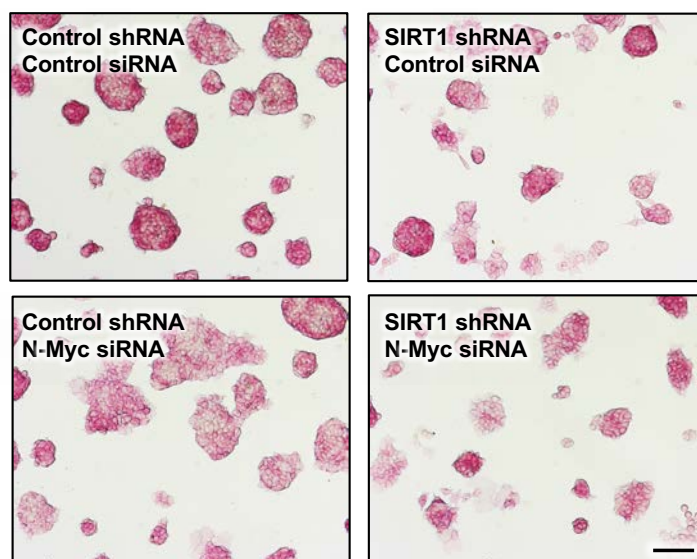**D**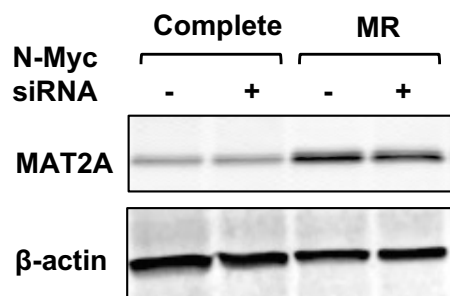**F**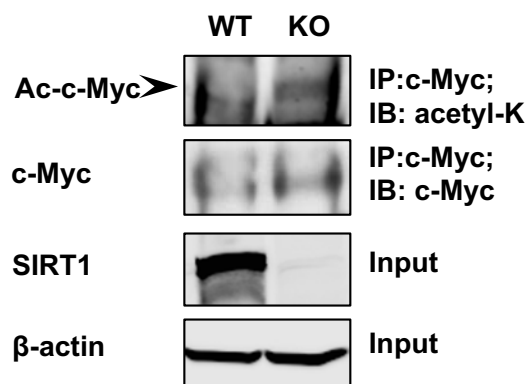

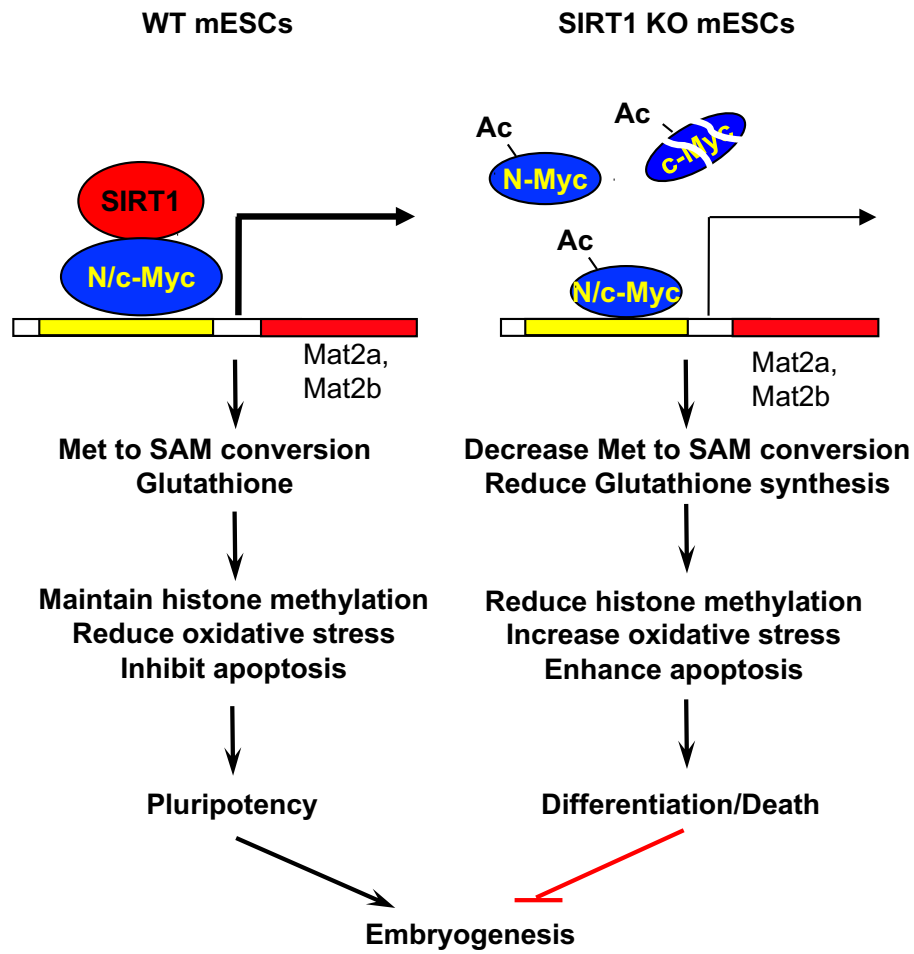

## Appendix Table S1. Metabolomic Analysis of the Influence of SIRT1 Gene on Metabolism in mESCs Cultured in a Complete M10 Medium or a Methionine Rescricted M10 Medium for 6 hours (amino acids and peptides)

|                          |                                                |             |                                        |                 |                         |                           | Fold of Change         |                           |                |      |          |      |      |
|--------------------------|------------------------------------------------|-------------|----------------------------------------|-----------------|-------------------------|---------------------------|------------------------|---------------------------|----------------|------|----------|------|------|
|                          |                                                |             |                                        |                 |                         |                           | ANOVA Contrasts        |                           |                |      |          |      |      |
|                          |                                                |             |                                        |                 |                         |                           | SIRT1 KO<br>WT         |                           | MR<br>Complete |      |          |      |      |
| Pathway<br>Sort<br>Order | Super<br>Pathway                               | Sub Pathway | Biochemical Name                       | Platform        | KEGG                    | HMDB                      | PubChem                | Complete                  | MR             | WT   | SIRT1 KO |      |      |
| 1                        | Glycine, Serine<br>and Threonine<br>Metabolism |             | glycine                                | LC/MS pos early | <a href="#">C00037</a>  | <a href="#">HMDB00123</a> | 750                    | 0.88                      | 0.72           | 2.92 | 2.41     |      |      |
| 2                        |                                                |             | N-acetylglycine                        | LC/MS pos early |                         | <a href="#">HMDB00532</a> | 10972                  | 1.20                      | 0.96           | 1.97 | 1.58     |      |      |
| 4                        |                                                |             | sarcosine                              | LC/MS pos early | <a href="#">C00213</a>  | <a href="#">HMDB00271</a> | 1088                   | 1.07                      | 0.33           | 2.93 | 0.91     |      |      |
| 5                        |                                                |             | dimethylglycine                        | LC/MS pos early | <a href="#">C01026</a>  | <a href="#">HMDB00092</a> | 673                    | 0.76                      | 0.80           | 1.02 | 1.07     |      |      |
| 6                        |                                                |             | betaine                                | LC/MS pos early | <a href="#">C00719</a>  | <a href="#">HMDB00043</a> | 247                    | 1.64                      | 1.21           | 1.28 | 0.94     |      |      |
| 9                        |                                                |             | serine                                 | LC/MS pos early | <a href="#">C00065</a>  | <a href="#">HMDB00187</a> | 5951                   | 1.01                      | 0.37           | 4.05 | 1.48     |      |      |
| 10                       |                                                |             | N-acetylserine                         | LC/MS pos early |                         | <a href="#">HMDB02931</a> | 65249                  | 1.11                      | 1.02           | 0.74 | 0.68     |      |      |
| 14                       |                                                |             | threonine                              | LC/MS pos early | <a href="#">C00188</a>  | <a href="#">HMDB00167</a> | 6288                   | 1.11                      | 0.81           | 1.49 | 1.08     |      |      |
| 15                       |                                                |             | N-acetylthreonine                      | LC/MS neg       |                         |                           | 152204                 | 0.88                      | 0.74           | 0.94 | 0.79     |      |      |
| 27                       |                                                |             | Alanine and<br>Aspartate<br>Metabolism |                 | alanine                 | LC/MS pos early           | <a href="#">C00041</a> | <a href="#">HMDB00161</a> | 5950           | 1.18 | 0.74     | 2.56 | 1.61 |
| 28                       |                                                |             |                                        |                 | N-acetylaniline         | LC/MS neg                 | <a href="#">C02847</a> | <a href="#">HMDB00766</a> | 88064          | 1.02 | 1.11     | 0.76 | 0.82 |
| 30                       |                                                |             |                                        |                 | aspartate               | LC/MS pos early           | <a href="#">C00049</a> | <a href="#">HMDB00191</a> | 5960           | 0.90 | 0.45     | 5.93 | 2.96 |
| 32                       |                                                |             |                                        |                 | asparagine              | LC/MS pos early           | <a href="#">C00152</a> | <a href="#">HMDB00168</a> | 6267           | 1.15 | 0.68     | 1.74 | 1.02 |
| 33                       |                                                |             |                                        |                 | N-acetylasparagine      | LC/MS pos early           |                        | <a href="#">HMDB06028</a> | 99715          | 1.06 | 0.44     | 4.29 | 1.80 |
| 34                       |                                                |             |                                        |                 | N-acetylaspartate (NAA) | LC/MS polar               | <a href="#">C01042</a> | <a href="#">HMDB00812</a> | 65065          | 1.57 | 1.15     | 1.06 | 0.78 |
| 39                       | 3-sulfo-L-alanine                              | LC/MS polar |                                        |                 | <a href="#">C00506</a>  | <a href="#">HMDB02757</a> | 72886                  | 0.72                      | 0.71           | 0.80 | 0.79     |      |      |
| 41                       | Glutamate                                      |             | glutamate                              | LC/MS pos early | <a href="#">C00025</a>  | <a href="#">HMDB00148</a> | 611                    | 1.02                      | 0.71           | 2.03 | 1.42     |      |      |
| 42                       |                                                |             | glutamine                              | LC/MS pos early | <a href="#">C00064</a>  | <a href="#">HMDB00641</a> | 5961                   | 1.04                      | 0.56           | 2.21 | 1.20     |      |      |
| 43                       |                                                |             | N-acetylglutamate                      | LC/MS polar     | <a href="#">C00624</a>  | <a href="#">HMDB01138</a> | 70914                  | 0.96                      | 0.78           | 0.92 | 0.75     |      |      |
| 44                       |                                                |             | N-acetylglutamine                      | LC/MS polar     | <a href="#">C02716</a>  | <a href="#">HMDB06029</a> | 182230                 | 0.72                      | 0.52           | 1.94 | 1.40     |      |      |
| 45                       |                                                |             | N-acetyl-aspartyl-glutamate (NAAG)     | LC/MS polar     | <a href="#">C12270</a>  | <a href="#">HMDB01067</a> | 5255                   | 0.53                      | 0.54           | 1.18 | 1.19     |      |      |



|     |                                             |                                 |                        |                           |                           |               |      |      |      |      |
|-----|---------------------------------------------|---------------------------------|------------------------|---------------------------|---------------------------|---------------|------|------|------|------|
| 46  | Metabolism                                  | gamma-aminobutyrate (GABA)      | LC/MS pos early        | <a href="#">C00334</a>    | <a href="#">HMDB00112</a> | 119           | 1.11 | 0.86 | 1.60 | 1.25 |
| 47  |                                             | carboxyethyl-GABA               | LC/MS pos early        |                           | <a href="#">HMDB02201</a> | 2572          | 0.88 | 1.02 | 1.10 | 1.27 |
| 52  |                                             | glutamate, gamma-methyl ester   | LC/MS pos early        |                           |                           | 68662         | 0.55 | 0.61 | 1.47 | 1.63 |
| 53  |                                             | pyroglutamine*                  | LC/MS pos early        |                           |                           | 134508        | 1.15 | 0.66 | 1.47 | 0.85 |
| 55  |                                             | N-methyl-GABA                   | LC/MS pos early        |                           |                           | 1550042;70703 | 1.13 | 0.65 | 2.24 | 1.27 |
| 58  | Histidine<br>Metabolism                     | histidine                       | LC/MS pos early        | <a href="#">C00135</a>    | <a href="#">HMDB00177</a> | 6274          | 1.05 | 0.95 | 1.21 | 1.10 |
| 59  |                                             | N-acetylhistidine               | LC/MS pos early        | <a href="#">C02997</a>    | <a href="#">HMDB32055</a> | 75619         | 1.10 | 0.59 | 1.74 | 0.93 |
| 60  |                                             | 1-methylhistidine               | LC/MS pos early        | <a href="#">C01152</a>    | <a href="#">HMDB00001</a> | 92105         | 1.11 | 0.76 | 1.65 | 1.13 |
| 61  |                                             | 3-methylhistidine               | LC/MS pos early        | <a href="#">C01152</a>    | <a href="#">HMDB00479</a> | 64969         | 1.10 | 0.68 | 1.46 | 0.91 |
| 69  |                                             | imidazole propionate            | LC/MS pos early        |                           | <a href="#">HMDB02271</a> | 70630         | 1.04 | 0.67 | 0.87 | 0.56 |
| 70  |                                             | imidazole lactate               | LC/MS pos early        | <a href="#">C05568</a>    | <a href="#">HMDB02320</a> | 440129        | 2.63 | 1.04 | 0.98 | 0.39 |
| 76  |                                             | 1-methylimidazoleacetate        | LC/MS pos early        | <a href="#">C05828</a>    | <a href="#">HMDB02820</a> | 75810         | 0.80 | 1.18 | 0.87 | 1.28 |
| 77  | 4-imidazoleacetate                          | LC/MS pos early                 | <a href="#">C02835</a> | <a href="#">HMDB02024</a> | 96215                     | 1.06          | 1.00 | 1.14 | 1.08 |      |
| 80  | Lysine<br>Metabolism                        | lysine                          | LC/MS pos early        | <a href="#">C00047</a>    | <a href="#">HMDB00182</a> | 5962          | 1.10 | 1.02 | 1.14 | 1.07 |
| 83  |                                             | N2-acetyllysine/N6-acetyllysine | LC/MS pos early        |                           |                           |               | 0.73 | 0.67 | 1.19 | 1.10 |
| 84  |                                             | N6,N6,N6-trimethyllysine        | LC/MS pos early        | <a href="#">C03793</a>    | <a href="#">HMDB01325</a> | 440120        | 1.15 | 0.87 | 1.40 | 1.06 |
| 85  |                                             | 5-hydroxylysine                 | LC/MS pos early        | <a href="#">C16741</a>    | <a href="#">HMDB00450</a> | 1029          | 0.54 | 0.34 | 1.46 | 0.91 |
| 87  |                                             | 2-aminoadipate                  | LC/MS pos early        | <a href="#">C00956</a>    | <a href="#">HMDB00510</a> | 469           | 2.07 | 1.63 | 3.25 | 2.56 |
| 90  |                                             | glutarate (pentanedioate)       | LC/MS polar            | <a href="#">C00489</a>    | <a href="#">HMDB00661</a> | 743           | 0.93 | 1.12 | 0.59 | 0.71 |
| 98  |                                             | pipecolate                      | LC/MS pos early        | <a href="#">C00408</a>    | <a href="#">HMDB00070</a> | 849           | 1.30 | 0.95 | 1.71 | 1.25 |
| 101 | 5-aminovalerate                             | LC/MS pos early                 | <a href="#">C00431</a> | <a href="#">HMDB03355</a> | 138                       | 1.07          | 0.77 | 1.74 | 1.24 |      |
| 108 | Phenylalanine<br>and Tyrosine<br>Metabolism | phenylalanine                   | LC/MS pos early        | <a href="#">C00079</a>    | <a href="#">HMDB00159</a> | 6140          | 1.06 | 0.93 | 1.27 | 1.11 |
| 109 |                                             | N-acetylphenylalanine           | LC/MS neg              | <a href="#">C03519</a>    | <a href="#">HMDB00512</a> | 74839         | 0.86 | 0.67 | 1.59 | 1.25 |
| 113 |                                             | phenyllactate (PLA)             | LC/MS polar            | <a href="#">C05607</a>    | <a href="#">HMDB00779</a> | 3848          | 1.51 | 3.37 | 0.38 | 0.84 |
| 120 |                                             | phenylacetyl glycine            | LC/MS neg              | <a href="#">C05598</a>    | <a href="#">HMDB00821</a> | 68144         | 1.04 | 1.23 | 0.85 | 1.00 |
| 123 |                                             | tyrosine                        | LC/MS pos early        | <a href="#">C00082</a>    | <a href="#">HMDB00158</a> | 6057          | 1.15 | 0.90 | 1.34 | 1.05 |
| 134 |                                             | 3-(4-hydroxyphenyl)lactate      | LC/MS neg              | <a href="#">C03672</a>    | <a href="#">HMDB00755</a> | 9378          | 0.96 | 1.61 | 0.45 | 0.76 |
| 139 |                                             | phenol sulfate                  | LC/MS neg              | <a href="#">C02180</a>    | <a href="#">HMDB60015</a> | 74426         | 1.05 | 1.31 | 0.73 | 0.91 |
| 142 |                                             | p-cresol sulfate                | LC/MS neg              | <a href="#">C01468</a>    | <a href="#">HMDB11635</a> | 4615423       | 1.00 | 1.31 | 0.74 | 0.98 |
| 177 | O-methyltyrosine                            | LC/MS pos early                 |                        |                           | 76957                     | 0.48          | 0.86 | 2.31 | 4.12 |      |
| 217 | Tryptophan                                  | tryptophan                      | LC/MS pos early        | <a href="#">C00078</a>    | <a href="#">HMDB00929</a> | 6305          | 1.06 | 0.95 | 1.22 | 1.09 |
| 221 |                                             | indolelactate                   | LC/MS neg              | <a href="#">C02043</a>    | <a href="#">HMDB00671</a> | 92904         | 1.10 | 2.19 | 0.36 | 0.71 |
| 227 |                                             | kynurenine                      | LC/MS pos early        | <a href="#">C00328</a>    | <a href="#">HMDB00684</a> | 161166        | 1.06 | 0.90 | 1.43 | 1.20 |

|     |                 |                                      |                                             |                        |                           |                           |                           |        |      |      |      |      |
|-----|-----------------|--------------------------------------|---------------------------------------------|------------------------|---------------------------|---------------------------|---------------------------|--------|------|------|------|------|
| 242 | Metabolism      | 5-hydroxyindoleacetate               | LC/MS pos early                             | <a href="#">C05635</a> | <a href="#">HMDB00763</a> | 1826                      | 2.16                      | 1.22   | 1.56 | 0.88 |      |      |
| 258 |                 | C-glycosyltryptophan                 | LC/MS pos early                             |                        |                           | 10981970                  | 1.10                      | 0.62   | 1.80 | 1.02 |      |      |
| 263 |                 | thioproline                          | LC/MS pos early                             |                        |                           | 93176;6973609             | 0.60                      | 0.69   | 0.95 | 1.09 |      |      |
| 265 | Amino Acid      | leucine                              | LC/MS pos early                             | <a href="#">C00123</a> | <a href="#">HMDB00687</a> | 6106                      | 1.04                      | 0.92   | 1.24 | 1.09 |      |      |
| 273 |                 | isovalerylcarnitine                  | LC/MS pos early                             |                        | <a href="#">HMDB00688</a> | 6426851                   | 0.46                      | 0.34   | 1.18 | 0.89 |      |      |
| 276 |                 | beta-hydroxyisovalerate              | LC/MS polar                                 |                        | <a href="#">HMDB00754</a> | 69362                     | 0.56                      | 0.82   | 0.63 | 0.91 |      |      |
| 277 |                 | beta-hydroxyisovaleroylcarnitine     | LC/MS pos early                             |                        |                           |                           | 1.10                      | 0.80   | 1.60 | 1.17 |      |      |
| 280 |                 | 3-methylglutaconate                  | LC/MS polar                                 |                        | <a href="#">HMDB00522</a> | 1551553                   | 0.94                      | 0.89   | 0.58 | 0.55 |      |      |
| 283 |                 | alpha-hydroxyisovalerate             | LC/MS polar                                 |                        | <a href="#">HMDB00407</a> | 99823                     | 1.46                      | 2.21   | 0.38 | 0.57 |      |      |
| 285 |                 | methylsuccinate                      | LC/MS polar                                 |                        | <a href="#">HMDB01844</a> | 10349                     | 0.91                      | 0.78   | 0.76 | 0.65 |      |      |
| 293 |                 | isoleucine                           | LC/MS pos early                             | <a href="#">C00407</a> | <a href="#">HMDB00172</a> | 6306                      | 1.07                      | 0.92   | 1.34 | 1.14 |      |      |
| 296 |                 | Leucine,<br>Isoleucine and<br>Valine | 3-methyl-2-oxobutyrate                      | LC/MS polar            | <a href="#">C00141</a>    | <a href="#">HMDB00019</a> | 49                        | 1.07   | 1.43 | 0.92 | 1.22 |      |
| 299 |                 |                                      | 2-methylbutyrylcarnitine (C5)               | LC/MS pos early        |                           | <a href="#">HMDB00378</a> | 6426901                   | 0.53   | 0.35 | 1.40 | 0.93 |      |
| 300 |                 |                                      | 2-methylbutyrylglycine                      | LC/MS pos early        |                           | <a href="#">HMDB00339</a> | 193872                    | 1.12   | 0.98 | 0.97 | 0.85 |      |
| 301 |                 | Metabolism                           | tiglylcarnitine                             | LC/MS pos early        |                           | <a href="#">HMDB02366</a> | 22833596                  | 0.87   | 0.54 | 1.29 | 0.80 |      |
| 304 |                 |                                      | 2-hydroxy-3-methylvalerate                  | LC/MS neg              |                           | <a href="#">HMDB00317</a> | 164623                    | 1.37   | 2.13 | 0.44 | 0.68 |      |
| 306 |                 |                                      | ethylmalonate                               | LC/MS polar            |                           | <a href="#">HMDB00622</a> | 11756                     | 0.48   | 0.34 | 0.86 | 0.62 |      |
| 307 |                 |                                      | valine                                      | LC/MS pos early        | <a href="#">C00183</a>    | <a href="#">HMDB00883</a> | 6287                      | 1.10   | 0.90 | 1.27 | 1.05 |      |
| 308 |                 |                                      | N-acetylvaline                              | LC/MS neg              |                           | <a href="#">HMDB11757</a> | 66789                     | 0.85   | 1.38 | 0.51 | 0.83 |      |
| 310 |                 |                                      | isobutyrylcarnitine                         | LC/MS pos early        |                           | <a href="#">HMDB00736</a> | 168379                    | 0.84   | 0.56 | 1.29 | 0.87 |      |
| 312 |                 |                                      | 3-hydroxyisobutyrate                        | LC/MS polar            | <a href="#">C06001</a>    | <a href="#">HMDB00336</a> | 87                        | 0.77   | 0.85 | 0.68 | 0.75 |      |
| 313 |                 |                                      | alpha-hydroxyisocaproate                    | LC/MS neg              | <a href="#">C03264</a>    | <a href="#">HMDB00746</a> | 83697                     | 1.36   | 2.22 | 0.39 | 0.64 |      |
| 324 |                 |                                      | Methionine,<br>Cysteine, SAM<br>and Taurine | methionine             | LC/MS pos early           | <a href="#">C00073</a>    | <a href="#">HMDB00696</a> | 6137   | 1.21 | 1.44 | 0.67 | 0.80 |
| 325 |                 |                                      |                                             | N-acetylmethionine     | LC/MS neg                 | <a href="#">C02712</a>    | <a href="#">HMDB11745</a> | 448580 | 1.11 | 1.26 | 0.97 | 1.10 |
| 326 |                 | N-formylmethionine                   |                                             | LC/MS neg              | <a href="#">C03145</a>    | <a href="#">HMDB01015</a> | 439750                    | 0.70   | 0.91 | 0.96 | 1.25 |      |
| 328 |                 | methionine sulfone                   |                                             | LC/MS pos early        |                           |                           | 69961                     | 1.00   | 0.60 | 2.00 | 1.19 |      |
| 329 |                 | methionine sulfoxide                 |                                             | LC/MS pos early        | <a href="#">C02989</a>    | <a href="#">HMDB02005</a> | 158980                    | 1.60   | 1.56 | 0.55 | 0.53 |      |
| 330 |                 | N-acetylmethionine sulfoxide         |                                             | LC/MS pos early        |                           |                           | 193368                    | 1.74   | 2.11 | 0.39 | 0.47 |      |
| 331 |                 | S-adenosylmethionine (SAM)           |                                             | LC/MS pos early        | <a href="#">C00019</a>    | <a href="#">HMDB01185</a> | 34755                     | 0.50   | 0.27 | 0.50 | 0.27 |      |
| 332 |                 | S-adenosylhomocysteine (SAH)         |                                             | LC/MS neg              | <a href="#">C00021</a>    | <a href="#">HMDB00939</a> | 439155                    | 0.89   | 0.87 | 1.62 | 1.58 |      |
| 333 | homocysteine    | LC/MS pos early                      |                                             | <a href="#">C00155</a> | <a href="#">HMDB00742</a> | 778                       | 0.49                      | 0.74   | 1.63 | 2.44 |      |      |
| 336 | cystathionine   | LC/MS pos early                      |                                             | <a href="#">C02291</a> | <a href="#">HMDB00099</a> | 439258                    | 0.26                      | 0.19   | 0.60 | 0.43 |      |      |
| 339 | 2-aminobutyrate | LC/MS pos early                      |                                             | <a href="#">C02261</a> | <a href="#">HMDB00650</a> | 439691                    | 1.31                      | 0.88   | 1.61 | 1.08 |      |      |

|     |                                                      |                                      |                 |                        |                           |                           |      |      |        |       |      |
|-----|------------------------------------------------------|--------------------------------------|-----------------|------------------------|---------------------------|---------------------------|------|------|--------|-------|------|
| 341 |                                                      | cysteine                             | LC/MS pos early | <a href="#">C00097</a> | <a href="#">HMDB00574</a> | 5862                      | 0.24 | 0.23 | 1.70   | 1.62  |      |
| 342 |                                                      | N-acetylcysteine                     | LC/MS pos early | <a href="#">C06809</a> | <a href="#">HMDB01890</a> | 12035                     | 0.24 | 0.14 | 3.77   | 2.20  |      |
| 343 |                                                      | cystine                              | LC/MS pos early | <a href="#">C00491</a> | <a href="#">HMDB00192</a> | 67678                     | 0.03 | 0.04 | 0.48   | 0.66  |      |
| 349 |                                                      | cysteine sulfinic acid               | LC/MS pos early | <a href="#">C00606</a> | <a href="#">HMDB00996</a> | 109                       | 0.39 | 0.49 | 0.90   | 1.12  |      |
| 351 |                                                      | hypotaurine                          | LC/MS polar     | <a href="#">C00519</a> | <a href="#">HMDB00965</a> | 107812                    | 1.08 | 0.70 | 3.11   | 2.00  |      |
| 352 |                                                      | taurine                              | LC/MS neg       | <a href="#">C00245</a> | <a href="#">HMDB00251</a> | 1123                      | 1.33 | 0.85 | 3.19   | 2.02  |      |
| 353 |                                                      | N-acetyltaurine                      | LC/MS neg       |                        |                           | 159864                    | 1.42 | 1.10 | 1.32   | 1.02  |      |
| 359 |                                                      | 2-hydroxybutyrate/2-hydroxyisobutyra | LC/MS polar     |                        |                           |                           | 1.42 | 1.12 | 0.52   | 0.41  |      |
| 360 | Urea cycle;<br>Arginine and<br>Proline<br>Metabolism | arginine                             | LC/MS pos early | <a href="#">C00062</a> | <a href="#">HMDB00517</a> | 232                       | 1.06 | 0.98 | 1.18   | 1.10  |      |
| 363 |                                                      | ornithine                            | LC/MS pos early | <a href="#">C00077</a> | <a href="#">HMDB03374</a> | 6262                      | 1.03 | 0.66 | 2.91   | 1.89  |      |
| 364 |                                                      | proline                              | LC/MS pos early | <a href="#">C00148</a> | <a href="#">HMDB00162</a> | 145742                    | 1.42 | 1.19 | 1.84   | 1.54  |      |
| 365 |                                                      | citrulline                           | LC/MS pos early | <a href="#">C00327</a> | <a href="#">HMDB00904</a> | 9750                      | 1.13 | 0.83 | 1.12   | 0.83  |      |
| 366 |                                                      | argininosuccinate                    | LC/MS pos early | <a href="#">C03406</a> | <a href="#">HMDB00052</a> | 16950;828                 | 1.37 | 1.01 | 1.12   | 0.83  |      |
| 368 |                                                      | homocitrulline                       | LC/MS pos early | <a href="#">C02427</a> | <a href="#">HMDB00679</a> | 65072                     | 1.31 | 0.78 | 1.61   | 0.96  |      |
| 372 |                                                      | dimethylarginine (SDMA + ADMA)       | LC/MS pos early | <a href="#">C03626</a> | <a href="#">HMDB01539</a> | 123831                    | 0.96 | 0.83 | 0.75   | 0.64  |      |
| 373 |                                                      | N-acetylarginine                     | LC/MS pos early | <a href="#">C02562</a> | <a href="#">HMDB04620</a> | 67427                     | 0.68 | 0.45 | 3.44   | 2.29  |      |
| 376 |                                                      | N-delta-acetylornithine              | LC/MS pos early |                        |                           | 9920500                   | 1.18 | 0.83 | 2.16   | 1.52  |      |
| 380 |                                                      | N-methylproline                      | LC/MS pos early |                        |                           | 557                       | 1.04 | 0.82 | 1.47   | 1.16  |      |
| 382 |                                                      | trans-4-hydroxyproline               | LC/MS pos early | <a href="#">C01157</a> | <a href="#">HMDB00725</a> | 5810                      | 0.82 | 0.45 | 3.66   | 2.01  |      |
| 384 |                                                      | pro-hydroxy-pro                      | LC/MS pos early |                        | <a href="#">HMDB06695</a> | 11673055                  | 2.59 | 1.30 | 3.18   | 1.60  |      |
| 385 |                                                      | N-monomethylarginine                 | LC/MS pos early | <a href="#">C03884</a> | <a href="#">HMDB29416</a> | 132862                    | 1.03 | 0.91 | 1.06   | 0.95  |      |
| 389 |                                                      | Creatine<br>Metabolism               | creatine        | LC/MS pos early        | <a href="#">C00300</a>    | <a href="#">HMDB00064</a> | 586  | 1.22 | 1.01   | 1.70  | 1.41 |
| 390 |                                                      |                                      | creatinine      | LC/MS pos early        | <a href="#">C00791</a>    | <a href="#">HMDB00562</a> | 588  | 1.09 | 1.02   | 1.50  | 1.40 |
| 395 | guanidinoacetate                                     |                                      | LC/MS pos early | <a href="#">C00581</a> | <a href="#">HMDB00128</a> | 763                       | 1.03 | 0.70 | 2.47   | 1.68  |      |
| 399 | Polyamine<br>Metabolism                              | putrescine                           | LC/MS pos early | <a href="#">C00134</a> | <a href="#">HMDB01414</a> | 1045                      | 5.13 | 0.83 | 382.51 | 61.57 |      |
| 400 |                                                      | spermine                             | LC/MS pos late  | <a href="#">C00750</a> | <a href="#">HMDB01256</a> | 1103                      | 0.75 | 1.24 | 0.79   | 1.30  |      |
| 402 |                                                      | spermidine                           | LC/MS pos early | <a href="#">C00315</a> | <a href="#">HMDB01257</a> | 1102                      | 1.93 | 1.28 | 1.82   | 1.21  |      |
| 403 |                                                      | 5-methylthioadenosine (MTA)          | LC/MS pos early | <a href="#">C00170</a> | <a href="#">HMDB01173</a> | 439176                    | 0.67 | 0.47 | 1.14   | 0.80  |      |
| 405 |                                                      | N(4)-acetylspermidine                | LC/MS pos early |                        |                           | 128317                    | 2.77 | 0.88 | 1.72   | 0.55  |      |
| 406 |                                                      | N-acetylputrescine                   | LC/MS pos early | <a href="#">C02714</a> | <a href="#">HMDB02064</a> | 122356                    | 2.97 | 0.38 | 232.32 | 29.92 |      |
| 407 |                                                      | 4-acetamidobutanoate                 | LC/MS polar     | <a href="#">C02946</a> | <a href="#">HMDB03681</a> | 18189                     | 2.22 | 0.82 | 3.38   | 1.25  |      |
| 412 | Guanidino and<br>Acetamido                           | 4-guanidinobutanoate                 | LC/MS pos early | <a href="#">C01035</a> | <a href="#">HMDB03464</a> | 500                       | 0.72 | 0.60 | 1.39   | 1.15  |      |
| 414 |                                                      | glutathione, reduced (GSH)           | LC/MS pos early | <a href="#">C00051</a> | <a href="#">HMDB00125</a> | 124886                    | 0.95 | 0.88 | 4.54   | 4.21  |      |

|     |                           |                                |                 |                           |                           |                 |      |      |      |      |
|-----|---------------------------|--------------------------------|-----------------|---------------------------|---------------------------|-----------------|------|------|------|------|
| 415 | Glutathione Metabolism    | glutathione, oxidized (GSSG)   | LC/MS pos early | <a href="#">C00127</a>    | <a href="#">HMDB03337</a> | 65359           | 1.58 | 1.34 | 2.10 | 1.79 |
| 417 |                           | cysteine-glutathione disulfide | LC/MS pos early |                           | <a href="#">HMDB00656</a> | 4247235         | 0.24 | 0.20 | 1.18 | 0.95 |
| 418 |                           | S-methylglutathione            | LC/MS pos early | <a href="#">C11347</a>    |                           | 3605667         | 0.77 | 1.00 | 0.61 | 0.80 |
| 420 |                           | cysteinylglycine               | LC/MS pos early | <a href="#">C01419</a>    | <a href="#">HMDB00078</a> | 439498          | 0.45 | 0.53 | 2.51 | 2.95 |
| 422 |                           | 5-oxoproline                   | LC/MS neg       | <a href="#">C01879</a>    | <a href="#">HMDB00267</a> | 7405            | 0.76 | 0.65 | 1.28 | 1.09 |
| 423 |                           | ophthalmate                    | LC/MS pos early |                           | <a href="#">HMDB05765</a> | 7018721         | 0.94 | 0.56 | 9.87 | 5.86 |
| 430 | Gamma-glutamyl Amino Acid | gamma-glutamylalanine          | LC/MS pos early |                           | <a href="#">HMDB29142</a> | 440103          | 1.04 | 0.56 | 4.09 | 2.19 |
| 431 |                           | gamma-glutamylcysteine         | LC/MS pos early | <a href="#">C00669</a>    | <a href="#">HMDB01049</a> | 842             | 0.48 | 0.57 | 1.70 | 2.00 |
| 432 |                           | gamma-glutamylglutamate        | LC/MS pos early | <a href="#">C05282</a>    | <a href="#">HMDB11737</a> | 92865           | 0.83 | 0.59 | 2.19 | 1.55 |
| 433 |                           | gamma-glutamylglutamine        | LC/MS pos early | <a href="#">C05283</a>    | <a href="#">HMDB11738</a> | 150914          | 0.93 | 0.49 | 2.52 | 1.33 |
| 434 |                           | gamma-glutamylglycine          | LC/MS pos early |                           | <a href="#">HMDB11667</a> | 165527          | 0.69 | 0.48 | 3.09 | 2.15 |
| 435 |                           | gamma-glutamylhistidine        | LC/MS pos early |                           |                           | 7017195         | 0.53 | 0.49 | 0.93 | 0.86 |
| 436 |                           | gamma-glutamylisoleucine*      | LC/MS pos early |                           | <a href="#">HMDB11170</a> | 14253342        | 0.71 | 0.76 | 1.37 | 1.47 |
| 437 |                           | gamma-glutamylleucine          | LC/MS pos early |                           | <a href="#">HMDB11171</a> | 151023          | 0.63 | 0.66 | 1.13 | 1.17 |
| 438 |                           | gamma-glutamyl-epsilon-lysine  | LC/MS pos early |                           | <a href="#">HMDB03869</a> | 65254;14284565  | 2.48 | 2.44 | 1.06 | 1.04 |
| 439 |                           | gamma-glutamylmethionine       | LC/MS pos early |                           | <a href="#">HMDB29155</a> | 7009567         | 0.94 | 1.20 | 0.66 | 0.85 |
| 440 |                           | gamma-glutamylphenylalanine    | LC/MS pos early |                           | <a href="#">HMDB00594</a> | 111299          | 0.54 | 0.51 | 1.00 | 0.95 |
| 441 |                           | gamma-glutamylthreonine*       | LC/MS pos early |                           | <a href="#">HMDB29159</a> |                 | 0.89 | 0.48 | 1.76 | 0.94 |
| 442 |                           | gamma-glutamyltryptophan       | LC/MS pos early |                           | <a href="#">HMDB29160</a> | 3989307         | 0.53 | 0.46 | 1.12 | 0.97 |
| 443 |                           | gamma-glutamyltyrosine         | LC/MS pos early |                           | <a href="#">HMDB11741</a> | 94340           | 0.41 | 0.36 | 0.96 | 0.83 |
| 444 | gamma-glutamylvaline      | LC/MS pos early                |                 | <a href="#">HMDB11172</a> | 7015683                   | 0.85            | 0.99 | 1.22 | 1.41 |      |
| 446 | Dipeptide Derivative      | carosine                       | LC/MS pos early | <a href="#">C00386</a>    | <a href="#">HMDB00033</a> | 439224          | 1.16 | 0.79 | 2.25 | 1.54 |
| 460 | Peptide                   | alanylleucine                  | LC/MS pos early |                           | <a href="#">HMDB28691</a> | 259583          | 0.82 | 1.42 | 0.90 | 1.56 |
| 559 |                           | glutaminylleucine              | LC/MS pos early |                           |                           |                 | 0.60 | 1.25 | 0.58 | 1.20 |
| 571 |                           | glycylisoleucine               | LC/MS pos early |                           | <a href="#">HMDB28844</a> | 88079           | 0.92 | 1.56 | 1.49 | 2.52 |
| 572 |                           | glycylleucine                  | LC/MS pos early | <a href="#">C02155</a>    | <a href="#">HMDB00759</a> | 92843           | 1.00 | 1.37 | 0.92 | 1.26 |
| 582 |                           | glycylvaline                   | LC/MS pos early |                           | <a href="#">HMDB28854</a> | 97417           | 0.99 | 1.33 | 0.88 | 1.18 |
| 587 |                           | histidylalanine                | LC/MS pos early |                           |                           | 351667          | 0.75 | 1.41 | 0.44 | 0.82 |
| 606 |                           | isoleucylglycine               | LC/MS pos early |                           |                           | 342532          | 1.12 | 1.76 | 0.94 | 1.49 |
| 619 |                           | leucylalanine                  | LC/MS pos early |                           |                           | 259321          | 0.82 | 1.01 | 0.93 | 1.15 |
| 624 |                           | leucylglycine                  | LC/MS pos early |                           |                           | 79070           | 0.85 | 1.34 | 0.88 | 1.39 |
| 672 |                           | phenylalanylalanine            | LC/MS pos early |                           |                           | 6993123;5488196 | 0.69 | 1.41 | 0.76 | 1.55 |

|     |                     |                 |                           |                 |             |             |             |             |
|-----|---------------------|-----------------|---------------------------|-----------------|-------------|-------------|-------------|-------------|
| 676 | phenylalanylglycine | LC/MS pos early |                           | 98207           | 0.77        | <b>1.63</b> | 0.86        | <b>1.82</b> |
| 693 | prolylglycine       | LC/MS pos early |                           | 7408076;6426709 | <b>1.40</b> | <b>1.18</b> | 0.96        | <b>0.81</b> |
| 757 | tyrosylglycine      | LC/MS pos early |                           | 259323          | 1.03        | <b>1.64</b> | <b>0.80</b> | <b>1.27</b> |
| 771 | valylglutamine      | LC/MS pos early |                           | 5253209         | 0.98        | <b>1.24</b> | 0.93        | 1.18        |
| 772 | valylglycine        | LC/MS pos early | <a href="#">HMDB29127</a> | 136487          | <b>1.27</b> | <b>2.02</b> | 1.20        | <b>1.91</b> |
| 775 | valylleucine        | LC/MS pos early | <a href="#">HMDB29131</a> | 352039          | 0.72        | 1.28        | 0.93        | <b>1.64</b> |
| 785 | leucylglutamine*    | LC/MS pos early |                           | 4305457         | 1.02        | <b>1.35</b> | 0.87        | 1.16        |

**Appendix Table S2. Significantly overlapped gene probes in KO/WT mESCs in complete medium and WT mESCs cultured in methionine restriction medium/complete medium**

| Probe         | Symbol                                               | Entrez Gene name                                                | FC (KO/WT) | p value  | FC (6uM WT/200u M WT) | p value    |
|---------------|------------------------------------------------------|-----------------------------------------------------------------|------------|----------|-----------------------|------------|
| A_52_P277415  | Mirg                                                 | miRNA containing gene                                           | -571.219   | 1.20E-15 | -3.42287              | 0.00427517 |
| A_51_P455997  | Meg3                                                 | maternally expressed 3                                          | -521.794   | 8.18E-21 | -2.33001              | 0.00196411 |
| A_52_P391505  | Meg3                                                 | maternally expressed 3                                          | -417.658   | 1.83E-23 | -2.05989              | 0.00073635 |
| A_52_P145433  | Snhg14                                               | small nucleolar RNA host gene 14                                | -146.298   | 1.50E-18 | -6.18824              | 2.85E-08   |
| A_52_P244     | Rian                                                 | RNA imprinted and accumulated in nucleus                        | -102.338   | 1.71E-24 | -2.09156              | 7.01E-06   |
| A_51_P178828  | MBL2                                                 | mannose-binding lectin (protein C) 2, soluble                   | -91.2646   | 2.68E-15 | -3.89778              | 6.57E-05   |
| A_52_P354390  | SNRPN                                                | small nuclear ribonucleoprotein polypeptide N                   | -75.9979   | 1.07E-27 | -1.79797              | 1.35E-06   |
| A_52_P196568  | Meg3                                                 | maternally expressed 3                                          | -65.6855   | 2.82E-13 | -5.41817              | 1.63E-05   |
| A_52_P54176   | AXIN2                                                | axin 2                                                          | -64.6377   | 2.94E-20 | -3.35685              | 1.31E-07   |
| A_52_P262080  | SNURF                                                | SNRPN upstream reading frame                                    | -58.709    | 9.97E-23 | -1.78798              | 0.00021825 |
| A_51_P232128  | PDCL2                                                | phosducin-like 2                                                | -50.2107   | 7.81E-17 | -4.57863              | 1.54E-07   |
| A_52_P619388  | KCNQ1OT1                                             | KCNQ1 opposite strand/antisense transcript 1 (non-protein c     | -47.5091   | 1.10E-13 | -2.36711              | 0.00582826 |
| A_51_P499623  | MLANA                                                | melan-A                                                         | -44.5414   | 8.83E-14 | 7.47254               | 8.79E-08   |
| A_51_P501710  | GNA13                                                | guanine nucleotide binding protein (G protein), alpha 13        | -42.8906   | 5.09E-15 | 2.50569               | 0.00092771 |
| A_52_P571780  | CALB2                                                | calbindin 2                                                     | -38.232    | 2.11E-15 | 1.82352               | 0.0151714  |
| A_52_P449084  | Fmr1nb                                               | fragile X mental retardation 1 neighbor                         | -34.3661   | 3.31E-20 | -1.69576              | 0.00127865 |
| A_51_P333594  |                                                      |                                                                 | -33.6974   | 3.88E-27 | -2.37567              | 2.64E-11   |
| A_51_P512293  | Gm7207                                               | predicted gene 7207                                             | -33.2945   | 1.13E-26 | -2.37166              | 6.08E-11   |
| A_51_P490070  | Xlr3c (includes otheX-linked lymphocyte-regulated 3C |                                                                 | -32.6984   | 2.44E-25 | 1.68334               | 6.46E-06   |
| A_51_P286563  | GNA13                                                | guanine nucleotide binding protein (G protein), alpha 13        | -32.1113   | 1.66E-17 | 1.85309               | 0.00220874 |
| A_52_P465718  | AURKC                                                | aurora kinase C                                                 | -30.8221   | 5.52E-26 | -2.28628              | 3.42E-10   |
| A_52_P102630  | Rian                                                 | RNA imprinted and accumulated in nucleus                        | -30.4912   | 3.75E-09 | -4.14704              | 0.00156676 |
| A_51_P258359  | HUS1B                                                | HUS1 checkpoint clamp component B                               | -28.9856   | 7.93E-17 | 1.67105               | 0.0110653  |
| A_51_P171107  | TMEM35                                               | transmembrane protein 35                                        | -27.4677   | 9.82E-13 | 9.65927               | 4.28E-09   |
| A_51_P457244  | Xlr4a (includes otheX-linked lymphocyte-regulated 4A |                                                                 | -24.8907   | 6.63E-17 | 1.81169               | 0.00250141 |
| A_52_P1013441 | Gm7789                                               | predicted pseudogene 7789                                       | -24.8046   | 1.12E-23 | -2.17076              | 1.79E-08   |
| A_51_P515883  | PLAC8                                                | placenta-specific 8                                             | -18.9026   | 4.22E-15 | -1.72141              | 0.0087118  |
| A_51_P109649  | Meg3                                                 | maternally expressed 3                                          | -18.5268   | 7.23E-15 | -4.55399              | 1.89E-08   |
| A_52_P476086  | NXF3                                                 | nuclear RNA export factor 3                                     | -18.1308   | 4.72E-10 | 2.68893               | 0.00364763 |
| A_52_P119947  | FAM20A                                               | family with sequence similarity 20, member A                    | -16.5935   | 5.93E-14 | 4.10797               | 1.68E-07   |
| A_51_P514405  | SLC2A5                                               | solute carrier family 2 (facilitated glucose/fructose transport | -16.4261   | 3.48E-19 | -2.1829               | 1.32E-06   |
| A_52_P308669  | CPN1                                                 | carboxypeptidase N, polypeptide 1                               | -16.1988   | 1.90E-11 | 2.85508               | 0.00036787 |
| A_51_P278464  | Fam183b                                              | family with sequence similarity 183, member B                   | -15.3472   | 6.00E-13 | -5.70388              | 1.17E-08   |
| A_51_P260850  | CNTNAP2                                              | contactin associated protein-like 2                             | -14.785    | 1.09E-13 | -4.04366              | 1.51E-07   |
| A_51_P457237  | Xlr4a (includes otheX-linked lymphocyte-regulated 4A |                                                                 | -14.2994   | 1.09E-08 | 2.66922               | 0.00644359 |
| A_52_P310511  | CA6                                                  | carbonic anhydrase VI                                           | -14.2429   | 2.67E-16 | -3.12035              | 6.14E-08   |
| A_52_P338266  | REC114                                               | REC114 meiotic recombination protein                            | -13.4352   | 4.39E-15 | 2.86533               | 1.14E-06   |
| A_52_P533731  |                                                      |                                                                 | -13.2042   | 1.05E-07 | -3.55196              | 0.00166467 |
| A_52_P681456  | RFTN2                                                | raftlin family member 2                                         | -13.1489   | 2.68E-08 | -4.81205              | 7.31E-05   |
| A_51_P115953  | CTXN3                                                | cortixin 3                                                      | -13.0949   | 4.48E-06 | -26.1875              | 7.85E-08   |
| A_52_P62534   | SAMD7                                                | sterile alpha motif domain containing 7                         | -12.6358   | 1.36E-18 | 2.24036               | 3.41E-07   |
| A_52_P113190  | MYO1F                                                | myosin IF                                                       | -12.5741   | 4.04E-22 | -2.8431               | 2.94E-12   |
| A_52_P675039  | FHAD1                                                | forkhead-associated (FHA) phosphopeptide binding domain         | -12.5409   | 5.28E-14 | -2.77781              | 5.87E-06   |
| A_51_P153423  | Fndc1                                                | fibronectin type III domain containing 1                        | -12.5089   | 5.56E-14 | 5.95268               | 1.82E-10   |
| A_51_P294095  | PRKAR1A                                              | protein kinase, cAMP-dependent, regulatory, type I, alpha       | -12.2583   | 7.18E-21 | 1.96473               | 1.97E-07   |

|               |                      |                                                            |          |           |          |            |
|---------------|----------------------|------------------------------------------------------------|----------|-----------|----------|------------|
| A_51_P416295  | IRGM                 | immunity-related GTPase family, M                          | -12.2482 | 2.14E-18  | -2.27428 | 2.70E-07   |
| A_52_P836118  | Defb42               | defensin beta 42                                           | -11.6457 | 6.95E-16  | 1.7487   | 0.00085859 |
| A_51_P267796  | DDR2                 | discoidin domain receptor tyrosine kinase 2                | -11.3955 | 3.09E-11  | 1.91703  | 0.00884242 |
| A_51_P125679  | REC114               | REC114 meiotic recombination protein                       | -11.0764 | 2.50E-23  | 3.24743  | 3.82E-15   |
| A_51_P504538  | CELA2A               | chymotrypsin-like elastase family, member 2A               | -10.7904 | 5.02E-16  | -5.11595 | 5.01E-12   |
| A_52_P579933  | SLC16A6              | solute carrier family 16, member 6                         | -10.6579 | 1.93E-11  | 6.44568  | 3.37E-09   |
| A_51_P332217  | USHBP1               | Usher syndrome 1C binding protein 1                        | -10.5954 | 2.73E-15  | -3.56853 | 4.18E-09   |
| A_51_P143200  | Tcstv3               | 2-cell-stage, variable group, member 3                     | -10.4662 | 2.05E-15  | 7.25832  | 1.37E-13   |
| A_51_P451377  | KNG1                 | kininogen 1                                                | -10.4204 | 3.42E-17  | -2.65165 | 2.36E-08   |
| A_52_P86693   | Ifi27                | interferon, alpha-inducible protein 27                     | -10.2865 | 8.41E-17  | 4.70688  | 2.08E-12   |
| A_51_P280893  | PLA2G1B              | phospholipase A2, group IB (pancreas)                      | -9.81757 | 1.47E-25  | -6.58127 | 2.85E-23   |
| A_51_P311199  | SNAP91               | synaptosomal-associated protein, 91kDa                     | -9.45967 | 2.80E-16  | 2.99693  | 4.99E-09   |
| A_52_P302671  | Zscan4c (includes o  | zinc finger and SCAN domain containing 4C                  | -9.27628 | 3.24E-12  | 11.7743  | 2.90E-13   |
| A_52_P247953  | MYH3                 | myosin, heavy chain 3, skeletal muscle, embryonic          | -9.1389  | 3.16E-13  | -1.72336 | 0.00385715 |
| A_51_P130374  | TEK                  | TEK tyrosine kinase, endothelial                           | -9.10873 | 1.71E-06  | 12.0412  | 2.26E-07   |
| A_52_P1045316 | B020004C17Rik (inc   | RIKEN cDNA B020004C17 gene                                 | -9.098   | 8.72E-12  | 2.53518  | 6.53E-05   |
| A_51_P167668  | MYH3                 | myosin, heavy chain 3, skeletal muscle, embryonic          | -8.97632 | 5.78E-14  | -1.62497 | 0.00510601 |
| A_51_P209782  | Cyp2c44              | cytochrome P450, family 2, subfamily c, polypeptide 44     | -8.94396 | 3.55E-11  | 2.46446  | 0.00018437 |
| A_52_P408391  | NEUROD1              | neuronal differentiation 1                                 | -8.76984 | 2.33E-08  | 10.1324  | 6.57E-09   |
| A_51_P359424  | SMTNL1               | smoothelin-like 1                                          | -8.68914 | 3.58E-17  | 7.51582  | 2.14E-16   |
| A_51_P161323  | EDA2R                | ectodysplasin A2 receptor                                  | -8.6643  | 2.53E-09  | 5.13914  | 4.77E-07   |
| A_51_P279841  | BLNK                 | B-cell linker                                              | -8.64047 | 4.17E-15  | -2.58524 | 2.65E-07   |
| A_52_P436393  | DMRT1                | doublesex and mab-3 related transcription factor 1         | -8.57401 | 8.92E-10  | -2.5109  | 0.00060357 |
| A_51_P220343  | WISP1                | WNT1 inducible signaling pathway protein 1                 | -8.43807 | 5.14E-12  | 5.00057  | 2.47E-09   |
| A_52_P354844  | EDA2R                | ectodysplasin A2 receptor                                  | -8.1789  | 7.41E-16  | 4.50131  | 2.67E-12   |
| A_51_P145360  | SDK1                 | sidekick cell adhesion molecule 1                          | -8.14437 | 1.76E-10  | -16.4052 | 2.29E-13   |
| A_52_P306007  | 1700016D06Rik        | RIKEN cDNA 1700016D06 gene                                 | -8.11946 | 2.80E-05  | -10.2238 | 6.25E-06   |
| A_51_P483438  | SEMA3E               | sema domain, immunoglobulin domain (Ig), short basic dom   | -8.09739 | 1.78E-11  | -1.86227 | 0.00335812 |
| A_51_P265489  | Slc5a4a              | solute carrier family 5, member 4a                         | -7.98467 | 6.19E-07  | 2.64988  | 0.00555274 |
| A_52_P115763  | C330024D21Rik        | RIKEN cDNA C330024D21 gene                                 | -7.98191 | 1.07E-11  | -2.18459 | 0.00028229 |
| A_51_P267441  | THEM5                | thioesterase superfamily member 5                          | -7.89413 | 1.36E-18  | 18.3871  | 1.38E-22   |
| A_52_P377160  | GALNT6               | polypeptide N-acetylgalactosaminyltransferase 6            | -7.80595 | 4.63E-12  | 5.97351  | 1.09E-10   |
| A_52_P439407  | SEMA3E               | sema domain, immunoglobulin domain (Ig), short basic dom   | -7.75792 | 0.0001884 | -4.62134 | 0.00331314 |
| A_52_P369562  | PSTPIP2              | proline-serine-threonine phosphatase interacting protein 2 | -7.71477 | 9.93E-10  | -8.94567 | 2.23E-10   |
| A_52_P948095  | Rian                 | RNA imprinted and accumulated in nucleus                   | -7.66047 | 2.24E-05  | -4.11967 | 0.001456   |
| A_52_P262201  | ATCAY                | ataxia, cerebellar, Cayman type                            | -7.5957  | 3.27E-06  | -3.46354 | 0.00140481 |
| A_51_P463060  | TMEM40               | transmembrane protein 40                                   | -7.59123 | 6.90E-20  | -1.87185 | 7.46E-08   |
| A_51_P259029  | DUSP26               | dual specificity phosphatase 26 (putative)                 | -7.58071 | 3.64E-18  | 3.46462  | 7.98E-13   |
| A_52_P111715  | GALNT6               | polypeptide N-acetylgalactosaminyltransferase 6            | -7.54618 | 6.38E-20  | 5.8105   | 2.50E-18   |
| A_51_P191726  | EFCAB6               | EF-hand calcium binding domain 6                           | -7.48556 | 1.40E-13  | 14.872   | 8.86E-17   |
| A_52_P487303  | RASGRP1              | RAS guanyl releasing protein 1 (calcium and DAG-regulated) | -7.47248 | 1.85E-15  | -2.0885  | 3.36E-06   |
| A_51_P277745  | ABCC2                | ATP-binding cassette, sub-family C (CFTR/MRP), member 2    | -7.40723 | 7.67E-18  | 3.5951   | 5.96E-13   |
| A_52_P555957  | IL7R                 | interleukin 7 receptor                                     | -7.40179 | 0.0072643 | -11.4583 | 0.00146764 |
| A_51_P354354  | GAL3ST1              | galactose-3-O-sulfotransferase 1                           | -7.33005 | 1.07E-18  | 2.24006  | 2.92E-09   |
| A_51_P322000  | LRP2                 | low density lipoprotein receptor-related protein 2         | -7.31545 | 1.11E-15  | -1.64996 | 0.0003679  |
| A_51_P319351  |                      |                                                            | -7.28011 | 0.0002308 | -7.25288 | 0.00023578 |
| A_51_P299149  | GPX6                 | glutathione peroxidase 6                                   | -7.23483 | 1.35E-09  | 75.119   | 1.03E-17   |
| A_52_P462657  | Gm11545              | predicted gene 11545                                       | -7.20521 | 9.54E-16  | 7.81701  | 3.41E-16   |
| A_52_P387884  | COL6A5               | collagen, type VI, alpha 5                                 | -7.17703 | 1.45E-09  | 3.20756  | 1.56E-05   |
| A_51_P432180  | SLC16A6              | solute carrier family 16, member 6                         | -7.16765 | 5.23E-18  | 3.57365  | 3.16E-13   |
| A_52_P176026  | Xlr4a (includes othe | X-linked lymphocyte-regulated 4A                           | -7.11934 | 4.39E-07  | 2.29323  | 0.00999354 |
| A_52_P596592  | RASSF9               | Ras association (RalGDS/AF-6) domain family (N-terminal) m | -7.06621 | 2.06E-07  | -4.05831 | 3.77E-05   |
| A_51_P362328  | GRHL2                | grainyhead-like transcription factor 2                     | -7.0479  | 1.14E-14  | -2.90889 | 9.81E-09   |

|              |                     |                                                             |          |           |          |            |
|--------------|---------------------|-------------------------------------------------------------|----------|-----------|----------|------------|
| A_51_P497741 | Wdr95               | WD40 repeat domain 95                                       | -7.03498 | 8.10E-15  | 6.80782  | 1.24E-14   |
| A_52_P207163 | EDA2R               | ectodysplasin A2 receptor                                   | -6.955   | 2.22E-07  | 5.66049  | 1.50E-06   |
| A_51_P468249 | PHEX                | phosphate regulating endopeptidase homolog, X-linked        | -6.87929 | 3.96E-11  | -1.68798 | 0.00861383 |
| A_52_P115565 | Platr14             | pluripotency associated transcript 14                       | -6.87136 | 7.79E-19  | -1.6024  | 1.57E-05   |
| A_51_P432641 | CXCL10              | chemokine (C-X-C motif) ligand 10                           | -6.86427 | 6.26E-08  | 14.2084  | 8.92E-11   |
| A_51_P490323 | Pzp                 | pregnancy zone protein                                      | -6.75134 | 3.39E-08  | 2.1766   | 0.00478533 |
| A_51_P177071 | NRG3                | neuregulin 3                                                | -6.73923 | 0.0005092 | -6.77015 | 0.00049656 |
| A_52_P506995 | PLET1               | placenta expressed transcript 1                             | -6.67828 | 2.92E-10  | 7.10608  | 1.45E-10   |
| A_52_P368690 | AMICA1              | adhesion molecule, interacts with CXADR antigen 1           | -6.60667 | 2.14E-07  | 6.5408   | 2.35E-07   |
| A_52_P401877 | CFAP54              | cilia and flagella associated 54                            | -6.59005 | 0.0011304 | -4.0313  | 0.01214    |
| A_51_P489289 | RHOH                | ras homolog family member H                                 | -6.57776 | 1.47E-13  | 5.40122  | 2.06E-12   |
| A_52_P367520 | NEXN                | nexilin (F actin binding protein)                           | -6.56335 | 5.25E-06  | -4.20836 | 0.00019472 |
| A_51_P162474 | Scml2               | sex comb on midleg-like 2 (Drosophila)                      | -6.55996 | 3.33E-13  | 1.89129  | 0.00017274 |
| A_51_P495331 | NEB                 | nebulin                                                     | -6.54391 | 4.51E-05  | 11.6506  | 8.14E-07   |
| A_52_P542570 | BHLHE23             | basic helix-loop-helix family, member e23                   | -6.51614 | 2.85E-12  | -1.86124 | 0.00059647 |
| A_52_P618427 | PDGFB               | platelet-derived growth factor beta polypeptide             | -6.46165 | 5.63E-07  | -3.11009 | 0.00052454 |
| A_51_P517878 | NKX2-8              | NK2 homeobox 8                                              | -6.42417 | 8.59E-07  | 32.9765  | 2.18E-12   |
| A_51_P402160 | ZNF750              | zinc finger protein 750                                     | -6.42383 | 1.18E-05  | 11.4461  | 1.43E-07   |
| A_52_P550325 | KCNJ16              | potassium channel, inwardly rectifying subfamily J, member  | -6.38757 | 0.0011495 | -4.12665 | 0.00989172 |
| A_51_P345340 | UPK3BL              | uroplakin 3B-like                                           | -6.36076 | 8.24E-14  | -3.83718 | 1.37E-10   |
| A_51_P402144 | C6orf15             | chromosome 6 open reading frame 15                          | -6.34985 | 4.44E-07  | -3.91778 | 4.48E-05   |
| A_52_P137193 | Al662270            | expressed sequence Al662270                                 | -6.32777 | 3.41E-09  | 7.20224  | 8.36E-10   |
| A_52_P448749 | TC2N                | tandem C2 domains, nuclear                                  | -6.20564 | 6.49E-05  | -6.46147 | 4.89E-05   |
| A_51_P315904 | GADD45G             | growth arrest and DNA-damage-inducible, gamma               | -6.19239 | 1.85E-15  | 9.24944  | 1.11E-17   |
| A_51_P496569 | SLIT2               | slit guidance ligand 2                                      | -6.14637 | 2.26E-14  | -2.58813 | 3.87E-08   |
| A_52_P384465 | MOBP                | myelin-associated oligodendrocyte basic protein             | -6.13344 | 4.73E-12  | -2.34749 | 9.99E-06   |
| A_52_P363843 | Zscan4c (includes o | zinc finger and SCAN domain containing 4C                   | -6.08767 | 4.51E-13  | 9.35264  | 2.37E-15   |
| A_51_P497724 | Apol7e (includes ot | apolipoprotein L 7e                                         | -6.06298 | 0.0008504 | -4.90446 | 0.00266893 |
| A_52_P100909 | CELF2               | CUGBP, Elav-like family member 2                            | -6.01101 | 7.69E-07  | 3.01193  | 0.00056788 |
| A_52_P619287 | Lincenc1            | long intergenic non-coding RNA, embryonic stem cells expre  | -6.00326 | 4.22E-18  | -1.99769 | 2.13E-08   |
| A_52_P655120 | GRIK2               | glutamate receptor, ionotropic, kainate 2                   | -5.99338 | 0.0037111 | -6.26579 | 0.00304152 |
| A_51_P201709 | GGT5                | gamma-glutamyltransferase 5                                 | -5.98195 | 1.12E-08  | 24.1848  | 2.60E-14   |
| A_51_P282538 | GAD1                | glutamate decarboxylase 1 (brain, 67kDa)                    | -5.97963 | 3.11E-06  | 2.29239  | 0.0118488  |
| A_51_P251129 | STARD8              | StAR-related lipid transfer (START) domain containing 8     | -5.97453 | 5.16E-10  | 1.69582  | 0.0107014  |
| A_52_P673458 | WT1                 | Wilms tumor 1                                               | -5.88978 | 1.11E-10  | -9.6118  | 4.02E-13   |
| A_51_P267447 | ADAM19              | ADAM metalloproteinase domain 19                            | -5.84774 | 4.92E-17  | -2.06623 | 3.91E-08   |
| A_51_P497875 | HORMAD1             | HORMA domain containing 1                                   | -5.8303  | 1.95E-10  | 2.59695  | 1.43E-05   |
| A_51_P247421 | FAM217A             | family with sequence similarity 217, member A               | -5.82346 | 7.66E-10  | -2.85    | 9.29E-06   |
| A_51_P262171 | Irgm1               | immunity-related GTPase family M member 1                   | -5.81062 | 7.34E-10  | -8.5944  | 8.63E-12   |
| A_51_P479330 | MARCH3              | membrane-associated ring finger (C3HC4) 3, E3 ubiquitin prc | -5.7688  | 0.0021876 | -6.33107 | 0.00137529 |
| A_51_P309158 | SNX20               | sorting nexin 20                                            | -5.74032 | 2.00E-05  | 18.3236  | 2.92E-09   |
| A_51_P514161 | Gm5662 (includes cp | predicted gene 5662                                         | -5.72864 | 5.03E-11  | 12.4142  | 8.27E-15   |
| A_51_P474701 | FBP1                | fructose-1,6-bisphosphatase 1                               | -5.69296 | 9.52E-07  | 8.72201  | 1.81E-08   |
| A_51_P519857 | Pdha2               | pyruvate dehydrogenase E1 alpha 2                           | -5.68764 | 4.26E-06  | 14.2428  | 1.94E-09   |
| A_51_P499551 | CD276               | CD276 molecule                                              | -5.58718 | 7.10E-16  | -2.07129 | 1.55E-07   |
| A_52_P134598 | Scml2               | sex comb on midleg-like 2 (Drosophila)                      | -5.49217 | 3.26E-11  | 2.01035  | 0.00018515 |
| A_51_P245533 | Tex19.1             | testis expressed gene 19.1                                  | -5.45155 | 5.52E-18  | 2.44545  | 3.83E-11   |
| A_51_P489488 | PDE4DIP             | phosphodiesterase 4D interacting protein                    | -5.44687 | 8.42E-11  | 1.60277  | 0.00915794 |
| A_51_P366306 | ZCCHC12             | zinc finger, CCHC domain containing 12                      | -5.39919 | 6.28E-09  | 2.63742  | 6.00E-05   |
| A_51_P404992 | EFHC2               | EF-hand domain (C-terminal) containing 2                    | -5.38743 | 1.32E-09  | 2.73516  | 1.26E-05   |
| A_51_P145693 | CUBN                | cubilin (intrinsic factor-cobalamin receptor)               | -5.3441  | 1.52E-06  | 7.64484  | 5.07E-08   |
| A_51_P131561 | PLET1               | placenta expressed transcript 1                             | -5.33743 | 7.54E-13  | 6.0599   | 1.30E-13   |
| A_51_P189814 | CLDN5               | claudin 5                                                   | -5.30782 | 1.19E-13  | -2.80943 | 5.57E-09   |



|              |                                                            |                                                                  |          |           |          |            |
|--------------|------------------------------------------------------------|------------------------------------------------------------------|----------|-----------|----------|------------|
| A_51_P508289 | EPHX1                                                      | epoxide hydrolase 1, microsomal (xenobiotic)                     | -5.29406 | 0.0002217 | 7.64477  | 1.74E-05   |
| A_52_P39654  | Rhox2a (includes otrepoductive homeobox 2A                 |                                                                  | -5.27735 | 1.66E-05  | 25.2907  | 8.18E-11   |
| A_52_P637988 | SLC1A1                                                     | solute carrier family 1 (neuronal/epithelial high affinity gluta | -5.25997 | 1.26E-09  | 8.79817  | 3.15E-12   |
| A_51_P352452 | DBX2                                                       | developing brain homeobox 2                                      | -5.22173 | 5.14E-16  | 9.30526  | 2.07E-19   |
| A_51_P166648 | EVA1C                                                      | eva-1 homolog C (C. elegans)                                     | -5.16853 | 8.57E-12  | 13.1015  | 1.43E-16   |
| A_51_P401974 | ENPP2                                                      | ectonucleotide pyrophosphatase/phosphodiesterase 2               | -5.15959 | 2.02E-06  | -3.05853 | 0.00035518 |
| A_51_P167360 | PTPN7                                                      | protein tyrosine phosphatase, non-receptor type 7                | -5.14834 | 4.65E-15  | 3.0787   | 3.74E-11   |
| A_52_P20727  | NHLRC1                                                     | NHL repeat containing E3 ubiquitin protein ligase 1              | -5.14573 | 1.65E-15  | 4.22201  | 4.09E-14   |
| A_52_P79821  | ESRP1                                                      | epithelial splicing regulatory protein 1                         | -5.09525 | 1.82E-06  | -3.46144 | 8.79E-05   |
| A_52_P438188 | ITSN1                                                      | intersectin 1 (SH3 domain protein)                               | -5.0808  | 1.22E-10  | -2.39277 | 1.19E-05   |
| A_52_P514391 | CCND2                                                      | cyclin D2                                                        | -5.0266  | 2.77E-12  | -5.17815 | 1.81E-12   |
| A_51_P461368 | SYTL3                                                      | synaptotagmin-like 3                                             | -4.99435 | 5.67E-08  | -2.50544 | 0.00025771 |
| A_52_P350344 | Timm8a2                                                    | translocase of inner mitochondrial membrane 8A2                  | -4.98999 | 1.77E-16  | 3.48089  | 1.02E-13   |
| A_51_P328889 | TEKT1                                                      | tektin 1                                                         | -4.95113 | 2.20E-14  | -1.87887 | 4.95E-06   |
| A_52_P876147 | CROCC2                                                     | ciliary rootlet coiled-coil, rootletin family member 2           | -4.92507 | 4.33E-12  | -19.6476 | 6.70E-19   |
| A_51_P499838 | BST1                                                       | bone marrow stromal cell antigen 1                               | -4.90098 | 1.69E-07  | 3.8383   | 2.84E-06   |
| A_51_P263993 | LIPC                                                       | lipase, hepatic                                                  | -4.89334 | 0.000233  | -4.19789 | 0.00069477 |
| A_52_P631889 | TFPI                                                       | tissue factor pathway inhibitor (lipoprotein-associated coagu    | -4.88878 | 1.20E-10  | -1.73763 | 0.00180941 |
| A_51_P377557 | CPSF4L                                                     | cleavage and polyadenylation specific factor 4-like              | -4.87736 | 1.29E-15  | -15.6101 | 6.55E-22   |
| A_51_P521304 | KLHL13                                                     | kelch-like family member 13                                      | -4.8368  | 6.45E-14  | -4.49207 | 2.07E-13   |
| A_52_P8587   | CD109                                                      | CD109 molecule                                                   | -4.8354  | 4.68E-08  | 7.38972  | 3.80E-10   |
| A_51_P487004 | DMRTC2                                                     | DMRT-like family C2                                              | -4.83062 | 2.60E-16  | -2.58747 | 5.19E-11   |
| A_52_P337388 | Fam205c                                                    | family with sequence similarity 205, member C                    | -4.82875 | 1.02E-06  | 5.00204  | 7.02E-07   |
| A_52_P764117 | SEC14L5                                                    | SEC14-like lipid binding 5                                       | -4.82187 | 3.77E-08  | 24.4145  | 4.69E-15   |
| A_52_P176634 | TAF9B                                                      | TAF9B RNA polymerase II, TATA box binding protein (TBP)-a:       | -4.81636 | 2.43E-09  | 3.82632  | 5.47E-08   |
| A_52_P554451 | 1300017J02Rik                                              | RIKEN cDNA 1300017J02 gene                                       | -4.79994 | 9.98E-10  | 1.75445  | 0.00327674 |
| A_51_P433228 | CCND2                                                      | cyclin D2                                                        | -4.79169 | 3.18E-18  | -5.47478 | 3.69E-19   |
| A_52_P53906  | CCND2                                                      | cyclin D2                                                        | -4.79079 | 3.85E-16  | -5.14534 | 1.23E-16   |
| A_52_P280044 | ADAM19                                                     | ADAM metallopeptidase domain 19                                  | -4.78759 | 1.34E-14  | -2.31646 | 1.62E-08   |
| A_52_P306744 | TSPAN8                                                     | tetraspanin 8                                                    | -4.78548 | 1.46E-06  | 5.29787  | 5.10E-07   |
| A_52_P194990 | PKD1L2                                                     | polycystic kidney disease 1-like 2 (gene/pseudogene)             | -4.78294 | 0.0003698 | -3.84464 | 0.00164849 |
| A_51_P328890 | TEKT1                                                      | tektin 1                                                         | -4.74989 | 1.03E-18  | -1.93298 | 1.15E-09   |
| A_51_P110759 | SLC1A1                                                     | solute carrier family 1 (neuronal/epithelial high affinity gluta | -4.74474 | 4.94E-08  | 10.182   | 1.14E-11   |
| A_51_P199475 | SIGLEC8                                                    | sialic acid binding Ig-like lectin 8                             | -4.70612 | 4.19E-07  | 2.51785  | 0.00053971 |
| A_52_P124183 | C030005K06Rik                                              | RIKEN cDNA C030005K06 gene                                       | -4.67268 | 0.000894  | -3.37241 | 0.00666927 |
| A_51_P110341 | SCGB3A1                                                    | secretoglobin, family 3A, member 1                               | -4.63678 | 1.33E-12  | -2.822   | 7.05E-09   |
| A_51_P520802 | CCM2L                                                      | cerebral cavernous malformation 2-like                           | -4.6324  | 1.29E-09  | -1.95917 | 0.00056828 |
| A_51_P399106 | C14orf159                                                  | chromosome 14 open reading frame 159                             | -4.62255 | 1.25E-16  | 4.09794  | 1.02E-15   |
| A_52_P389874 | LDB3                                                       | LIM domain binding 3                                             | -4.61406 | 6.15E-07  | 1.98885  | 0.00751725 |
| A_51_P450549 | PADI3                                                      | peptidyl arginine deiminase, type III                            | -4.60549 | 7.08E-13  | 4.44416  | 1.24E-12   |
| A_52_P256476 | Gm6346 (includes cuncharacterized LOC620639                |                                                                  | -4.5987  | 1.62E-05  | 8.4242   | 6.66E-08   |
| A_52_P619991 | THEM4                                                      | thioesterase superfamily member 4                                | -4.59723 | 0.0013324 | -4.83104 | 0.00098292 |
| A_52_P533161 | ABLIM1                                                     | actin binding LIM protein 1                                      | -4.55901 | 1.41E-07  | 1.9483   | 0.00478902 |
| A_52_P165773 | PRMT8                                                      | protein arginine methyltransferase 8                             | -4.52147 | 1.35E-06  | -4.41413 | 1.76E-06   |
| A_51_P481482 | DRAM1                                                      | DNA-damage regulated autophagy modulator 1                       | -4.50594 | 9.79E-07  | 1.93132  | 0.0109484  |
| A_51_P135732 | CCDC136                                                    | coiled-coil domain containing 136                                | -4.50423 | 3.56E-14  | -4.26421 | 8.84E-14   |
| A_52_P188172 | SYNJ2                                                      | synaptojanin 2                                                   | -4.49822 | 0.0003886 | -3.00882 | 0.00632953 |
| A_51_P381297 | PAX8                                                       | paired box 8                                                     | -4.48764 | 3.97E-05  | -5.27874 | 9.41E-06   |
| A_51_P345344 | UPK3BL                                                     | uroplakin 3B-like                                                | -4.48679 | 2.29E-11  | -2.68499 | 1.25E-07   |
| A_52_P126158 | Irgm1                                                      | immunity-related GTPase family M member 1                        | -4.46654 | 3.33E-13  | -6.57913 | 1.12E-15   |
| A_51_P302273 | Usp17la (includes o ubiquitin specific peptidase 17-like A |                                                                  | -4.45296 | 1.29E-08  | 13.1758  | 6.66E-14   |
| A_51_P244950 | DPYS                                                       | dihydropyrimidinase                                              | -4.4427  | 5.54E-20  | 1.62252  | 2.57E-08   |
| A_51_P187018 | MAGOHB                                                     | mago homolog B, exon junction complex core component             | -4.4364  | 3.51E-14  | 1.64612  | 6.48E-05   |

|               |                     |                                                               |          |           |          |            |
|---------------|---------------------|---------------------------------------------------------------|----------|-----------|----------|------------|
| A_51_P167489  | LAMA3               | laminin, alpha 3                                              | -4.43334 | 1.11E-10  | 2.5245   | 1.14E-06   |
| A_51_P458451  | ADIPOQ              | adiponectin, C1Q and collagen domain containing               | -4.41707 | 5.59E-05  | -2.87166 | 0.00221411 |
| A_52_P95544   | SCARF1              | scavenger receptor class F, member 1                          | -4.39198 | 1.80E-19  | -1.78959 | 1.32E-09   |
| A_52_P263763  | MAP7D3              | MAP7 domain containing 3                                      | -4.38726 | 5.25E-12  | -2.29819 | 6.30E-07   |
| A_52_P590535  | FBLN2               | fibulin 2                                                     | -4.36612 | 2.61E-08  | 3.15338  | 2.13E-06   |
| A_51_P496562  | SLIT2               | slit guidance ligand 2                                        | -4.35462 | 1.91E-08  | -2.29842 | 0.00014822 |
| A_52_P510310  | SERPINE2            | serpin peptidase inhibitor, clade E (nexin, plasminogen activ | -4.33562 | 8.39E-09  | 9.26596  | 8.78E-13   |
| A_51_P106114  | A230070E04Rik       | RIKEN cDNA A230070E04 gene                                    | -4.32745 | 7.56E-07  | 3.06161  | 4.36E-05   |
| A_51_P511000  | CWH43               | cell wall biogenesis 43 C-terminal homolog                    | -4.32115 | 1.03E-05  | -2.16627 | 0.00848183 |
| A_52_P14778   | PIWIL4              | piwi-like RNA-mediated gene silencing 4                       | -4.27917 | 0.0002442 | 3.51513  | 0.00111303 |
| A_51_P512210  | MYH6                | myosin, heavy chain 6, cardiac muscle, alpha                  | -4.25406 | 2.43E-05  | 3.07269  | 0.0005285  |
| A_51_P428529  | Oas1d (includes oth | 2'-5' oligoadenylate synthetase 1D                            | -4.24485 | 5.80E-17  | -3.72849 | 6.47E-16   |
| A_51_P226453  | ACOT11              | acyl-CoA thioesterase 11                                      | -4.2333  | 1.28E-14  | -3.39193 | 7.41E-13   |
| A_51_P317141  | COL2A1              | collagen, type II, alpha 1                                    | -4.22431 | 2.29E-11  | 5.47552  | 4.83E-13   |
| A_51_P108645  | ITSN1               | intersectin 1 (SH3 domain protein)                            | -4.21846 | 2.05E-14  | -2.03476 | 1.09E-07   |
| A_51_P326631  | DNAH8               | dynein, axonemal, heavy chain 8                               | -4.19615 | 4.63E-15  | -10.2284 | 1.57E-20   |
| A_52_P803532  |                     |                                                               | -4.19321 | 0.0030724 | -3.36054 | 0.0105692  |
| A_52_P231729  | HLA-A               | major histocompatibility complex, class I, A                  | -4.12307 | 5.00E-08  | -5.69261 | 8.31E-10   |
| A_51_P268068  | SIX1                | SIX homeobox 1                                                | -4.11859 | 4.53E-14  | -2.33346 | 4.91E-09   |
| A_51_P100768  | 4833413E03Rik       | RIKEN cDNA 4833413E03 gene                                    | -4.10793 | 6.24E-05  | -2.33167 | 0.00876148 |
| A_51_P362292  | MS4A10              | membrane-spanning 4-domains, subfamily A, member 10           | -4.10457 | 1.73E-08  | 10.884   | 1.60E-13   |
| A_51_P318933  | CAMK2B              | calcium/calmodulin-dependent protein kinase II beta           | -4.0954  | 3.48E-18  | -1.52594 | 1.69E-06   |
| A_52_P662911  | 1700020N01Rik       | RIKEN cDNA 1700020N01 gene                                    | -4.08273 | 0.0001798 | 2.62403  | 0.00621813 |
| A_51_P481777  | Tcstv1              | 2-cell-stage, variable group, member 1                        | -4.07499 | 7.34E-09  | 9.76301  | 1.52E-13   |
| A_52_P1156957 | ACOT1               | acyl-CoA thioesterase 1                                       | -4.06892 | 1.72E-08  | -2.10685 | 0.00028873 |
| A_51_P147766  | CPNE9               | copine family member IX                                       | -4.06794 | 1.67E-16  | -3.51256 | 2.77E-15   |
| A_52_P54280   | ADCK3               | aarF domain containing kinase 3                               | -4.06698 | 5.22E-09  | 1.7672   | 0.00226384 |
| A_51_P337897  | PRRC1               | proline-rich coiled-coil 1                                    | -4.06673 | 2.23E-15  | -1.66532 | 4.21E-06   |
| A_52_P298112  | Neb1                | nebulette                                                     | -4.06269 | 4.70E-06  | -7.51193 | 7.53E-09   |
| A_51_P348857  | POU6F1              | POU class 6 homeobox 1                                        | -4.04561 | 6.10E-13  | -1.77172 | 2.12E-05   |
| A_52_P149017  | RIMKLB              | ribosomal modification protein rimK-like family member B      | -4.00842 | 6.84E-13  | -2.22726 | 8.78E-08   |
| A_51_P499020  | FBP2                | fructose-1,6-bisphosphatase 2                                 | -3.98074 | 1.24E-19  | 4.24097  | 3.75E-20   |
| A_52_P418494  | PRRC1               | proline-rich coiled-coil 1                                    | -3.96824 | 1.61E-20  | -2.2839  | 9.74E-15   |
| A_51_P112355  | Igtp                | interferon gamma induced GTPase                               | -3.96488 | 1.00E-13  | 2.68957  | 2.12E-10   |
| A_52_P604735  | FBXL2               | F-box and leucine-rich repeat protein 2                       | -3.94475 | 0.0022056 | -3.91915 | 0.00229811 |
| A_51_P162481  | Scml2               | sex comb on midleg-like 2 (Drosophila)                        | -3.94219 | 0.000668  | 2.53171  | 0.0150254  |
| A_51_P366811  | APOD                | apolipoprotein D                                              | -3.93907 | 4.39E-10  | 2.05173  | 3.76E-05   |
| A_51_P200599  | TCP11X2             | t-complex 11 family, X-linked 2                               | -3.93755 | 9.02E-06  | 1.94896  | 0.0135669  |
| A_51_P418820  | TFAP2C              | transcription factor AP-2 gamma (activating enhancer bindir   | -3.93588 | 1.71E-14  | 1.93898  | 1.39E-07   |
| A_52_P244005  | CD80                | CD80 molecule                                                 | -3.93315 | 1.44E-07  | 11.6401  | 5.92E-13   |
| A_51_P146149  | NAPSA               | napsin A aspartic peptidase                                   | -3.92863 | 5.65E-18  | -1.79829 | 3.29E-09   |
| A_52_P423222  | NFE2L3              | nuclear factor, erythroid 2-like 3                            | -3.92559 | 1.74E-06  | -10.5764 | 4.20E-11   |
| A_52_P168575  | Fam169b             | family with sequence similarity 169, member B                 | -3.92333 | 7.90E-12  | -1.51129 | 0.00217894 |
| A_51_P296090  | ACSF3               | acyl-CoA synthetase family member 3                           | -3.91187 | 2.45E-14  | -1.82509 | 8.79E-07   |
| A_52_P181748  | FLVCR1              | feline leukemia virus subgroup C cellular receptor 1          | -3.90994 | 4.69E-16  | 1.67136  | 8.85E-07   |
| A_51_P352357  | LDHAL6B             | lactate dehydrogenase A-like 6B                               | -3.90068 | 1.67E-15  | 3.32326  | 3.81E-14   |
| A_51_P161890  | FCGRT               | Fc fragment of IgG, receptor, transporter, alpha              | -3.89831 | 6.09E-11  | -3.19073 | 1.87E-09   |
| A_51_P238165  | SSTR2               | somatostatin receptor 2                                       | -3.88341 | 4.82E-10  | -3.28139 | 7.46E-09   |
| A_52_P413826  |                     |                                                               | -3.86968 | 0.0004323 | -3.38519 | 0.00123003 |
| A_52_P220176  | DKK3                | dickkopf WNT signaling pathway inhibitor 3                    | -3.86419 | 1.07E-16  | -2.56911 | 8.15E-13   |
| A_51_P214747  | PARP12              | poly (ADP-ribose) polymerase family, member 12                | -3.86209 | 4.74E-10  | -1.55272 | 0.00526589 |
| A_51_P143296  | MYH8                | myosin, heavy chain 8, skeletal muscle, perinatal             | -3.8551  | 1.10E-12  | 2.30679  | 3.35E-08   |
| A_51_P340653  | SLC16A4             | solute carrier family 16, member 4                            | -3.84764 | 8.93E-06  | -11.9488 | 1.03E-10   |

|              |                   |                                                               |          |           |          |            |
|--------------|-------------------|---------------------------------------------------------------|----------|-----------|----------|------------|
| A_51_P410576 | CCDC113           | coiled-coil domain containing 113                             | -3.84379 | 1.25E-10  | 3.48086  | 6.51E-10   |
| A_51_P198511 |                   |                                                               | -3.82765 | 0.0046028 | -3.11674 | 0.0144216  |
| A_51_P463562 | GBP6              | guanylate binding protein family, member 6                    | -3.82137 | 8.00E-08  | -4.38186 | 1.25E-08   |
| A_52_P552401 |                   |                                                               | -3.81817 | 8.27E-07  | 18.0629  | 7.36E-14   |
| A_52_P72007  | Defb10/Defb11     | defensin beta 11                                              | -3.81297 | 0.0014952 | -4.89462 | 0.00026086 |
| A_51_P271930 | C16orf95          | chromosome 16 open reading frame 95                           | -3.80474 | 4.63E-08  | 2.64823  | 9.44E-06   |
| A_51_P322273 | PTP4A3            | protein tyrosine phosphatase type IVA, member 3               | -3.79833 | 1.94E-13  | 3.75983  | 2.33E-13   |
| A_51_P402908 |                   |                                                               | -3.79783 | 3.44E-10  | 2.64508  | 1.80E-07   |
| A_51_P455157 | MYBPC2            | myosin binding protein C, fast type                           | -3.79475 | 1.08E-15  | 2.51061  | 8.75E-12   |
| A_51_P389885 | SPIC              | Spi-C transcription factor (Spi-1/PU.1 related)               | -3.79184 | 5.61E-13  | -2.1668  | 6.76E-08   |
| A_51_P111532 | UBASH3A           | ubiquitin associated and SH3 domain containing A              | -3.78702 | 1.32E-10  | -1.50257 | 0.00542832 |
| A_51_P100063 | LNK1              | ligand of numb-protein X 1, E3 ubiquitin protein ligase       | -3.78374 | 0.0031743 | -3.24608 | 0.00799642 |
| A_52_P122154 |                   |                                                               | -3.78315 | 0.0089919 | -3.73262 | 0.00962724 |
| A_51_P521052 | Ly6k              | lymphocyte antigen 6 complex, locus K                         | -3.77977 | 1.74E-08  | 8.8633   | 3.31E-13   |
| A_51_P268094 | SERPINE2          | serpin peptidase inhibitor, clade E (nexin, plasminogen activ | -3.77458 | 1.91E-06  | 12.2051  | 6.43E-12   |
| A_52_P629112 | PAK3              | p21 protein (Cdc42/Rac)-activated kinase 3                    | -3.77045 | 2.12E-08  | 2.39214  | 2.31E-05   |
| A_51_P519420 | P2RX5             | purinergic receptor P2X, ligand gated ion channel, 5          | -3.77002 | 7.05E-11  | 2.64326  | 4.33E-08   |
| A_51_P254656 | HDC               | histidine decarboxylase                                       | -3.76498 | 9.70E-05  | 2.16745  | 0.0130866  |
| A_52_P492189 |                   |                                                               | -3.74866 | 3.31E-05  | 4.49334  | 5.23E-06   |
| A_52_P408315 | VWA3B             | von Willebrand factor A domain containing 3B                  | -3.73242 | 1.49E-06  | 3.15005  | 1.24E-05   |
| A_51_P307589 | TDRD9             | tudor domain containing 9                                     | -3.73123 | 2.80E-07  | 4.01495  | 1.06E-07   |
| A_51_P268069 | SIX1              | SIX homeobox 1                                                | -3.72048 | 7.07E-14  | -2.21987 | 5.36E-09   |
| A_51_P232763 | KCNQ10T1          | KCNQ1 opposite strand/antisense transcript 1 (non-protein c   | -3.71277 | 2.07E-06  | -1.78643 | 0.0136064  |
| A_51_P326769 | GNAS              | GNAS complex locus                                            | -3.70876 | 2.03E-05  | -4.21751 | 5.18E-06   |
| A_52_P481988 | DDR2              | discoidin domain receptor tyrosine kinase 2                   | -3.70843 | 1.02E-05  | 2.005    | 0.00812837 |
| A_51_P484842 | ASGR2             | asialoglycoprotein receptor 2                                 | -3.70431 | 1.35E-14  | 2.0567   | 9.80E-09   |
| A_52_P450934 | PAQR9             | progesterin and adipoQ receptor family member IX              | -3.697   | 1.23E-10  | 2.16151  | 2.90E-06   |
| A_51_P430929 | FAM20A            | family with sequence similarity 20, member A                  | -3.69527 | 1.28E-10  | 4.14414  | 1.96E-11   |
| A_51_P514351 | 3830403N18Rik/Xlr | X-linked lymphocyte-regulated                                 | -3.68716 | 6.18E-09  | 1.614    | 0.00545384 |
| A_52_P150236 | APOM              | apolipoprotein M                                              | -3.68624 | 1.31E-08  | 2.98249  | 3.51E-07   |
| A_52_P372151 | CTNNA1            | catenin (cadherin-associated protein), alpha-like 1           | -3.67743 | 1.41E-15  | -2.69285 | 1.16E-12   |
| A_52_P621588 | IFNLR1            | interferon, lambda receptor 1                                 | -3.67733 | 2.12E-16  | -1.52133 | 6.48E-06   |
| A_51_P460279 | SAXO1             | stabilizer of axonemal microtubules 1                         | -3.6769  | 1.34E-05  | -2.60391 | 0.00059304 |
| A_52_P5855   | EGFR              | epidermal growth factor receptor                              | -3.66969 | 0.0071075 | -3.17441 | 0.0154029  |
| A_51_P501145 | LEF1              | lymphoid enhancer-binding factor 1                            | -3.66808 | 6.48E-13  | -7.66217 | 8.16E-18   |
| A_51_P474029 | Rhox13            | reproductive homeobox 13                                      | -3.65921 | 6.01E-10  | 9.22793  | 1.94E-15   |
| A_52_P569499 | STAT3             | signal transducer and activator of transcription 3 (acute-pha | -3.65026 | 0.0071454 | -4.10241 | 0.00373027 |
| A_51_P197596 | AFAP1L2           | actin filament associated protein 1-like 2                    | -3.64964 | 1.07E-12  | 8.61583  | 2.96E-18   |
| A_51_P227353 | CREG2             | cellular repressor of E1A-stimulated genes 2                  | -3.6422  | 4.52E-15  | -2.22877 | 3.40E-10   |
| A_52_P361323 | SPIC              | Spi-C transcription factor (Spi-1/PU.1 related)               | -3.63867 | 2.79E-15  | -2.25744 | 1.56E-10   |
| A_51_P125965 | RYR3              | ryanodine receptor 3                                          | -3.62389 | 0.0003427 | -3.87645 | 0.00019268 |
| A_51_P420400 | LEF1              | lymphoid enhancer-binding factor 1                            | -3.60276 | 9.31E-10  | -7.24596 | 4.25E-14   |
| A_51_P227845 | 4930502E18Rik     | RIKEN cDNA 4930502E18 gene                                    | -3.58185 | 1.08E-11  | -2.18575 | 2.46E-07   |
| A_52_P300344 | PM20D1            | peptidase M20 domain containing 1                             | -3.57786 | 9.38E-12  | 7.09325  | 2.58E-16   |
| A_52_P512274 | DNAH2             | dynein, axonemal, heavy chain 2                               | -3.56526 | 4.18E-11  | 2.83338  | 3.02E-09   |
| A_51_P273596 | SORD              | sorbitol dehydrogenase                                        | -3.56382 | 1.13E-14  | 5.97226  | 1.78E-18   |
| A_52_P488501 | GTSF1L            | gametocyte specific factor 1-like                             | -3.5636  | 6.05E-18  | -2.09517 | 4.34E-12   |
| A_52_P66226  | RAB33A            | RAB33A, member RAS oncogene family                            | -3.53738 | 3.06E-12  | -2.14664 | 1.18E-07   |
| A_52_P271166 | DAZ2              | deleted in azoospermia 2                                      | -3.53673 | 5.33E-11  | 1.86184  | 2.40E-05   |
| A_52_P70888  | Snhg11            | small nucleolar RNA host gene 11                              | -3.53191 | 2.90E-10  | -2.37972 | 4.42E-07   |
| A_52_P204331 | C9orf152          | chromosome 9 open reading frame 152                           | -3.52916 | 2.37E-14  | -4.7017  | 1.34E-16   |
| A_52_P569276 | MASP2             | mannan-binding lectin serine peptidase 2                      | -3.52502 | 0.0011432 | -3.14976 | 0.00264515 |
| A_51_P409729 | ZNF112            | zinc finger protein 112                                       | -3.5201  | 3.25E-05  | 4.48885  | 2.42E-06   |

|              |                      |                                                                |          |           |          |            |
|--------------|----------------------|----------------------------------------------------------------|----------|-----------|----------|------------|
| A_51_P247168 | CFAP43               | cilia and flagella associated protein 43                       | -3.51555 | 2.55E-06  | 2.71139  | 6.97E-05   |
| A_52_P77234  | Usp17la (includes o  | ubiquitin specific peptidase 17-like A                         | -3.51266 | 6.62E-05  | 13.7968  | 1.57E-10   |
| A_51_P483241 | CNPY1                | canopy FGF signaling regulator 1                               | -3.51096 | 4.07E-10  | -3.96241 | 5.45E-11   |
| A_52_P611787 | SLC47A1              | solute carrier family 47 (multidrug and toxin extrusion), men  | -3.50904 | 5.66E-15  | -2.75067 | 1.09E-12   |
| A_51_P420731 | THY1                 | Thy-1 cell surface antigen                                     | -3.50004 | 5.19E-13  | -2.55597 | 3.73E-10   |
| A_52_P510527 | PIRT                 | phosphoinositide-interacting regulator of transient receptor   | -3.49912 | 1.42E-06  | -4.07307 | 2.00E-07   |
| A_51_P514623 | CD302                | CD302 molecule                                                 | -3.49491 | 9.47E-17  | 1.61451  | 2.29E-07   |
| A_51_P105124 | P2RY6                | pyrimidinergic receptor P2Y, G-protein coupled, 6              | -3.49258 | 7.34E-10  | 17.5917  | 1.32E-18   |
| A_51_P439645 | 1700001C19Rik        | RIKEN cDNA 1700001C19 gene                                     | -3.49007 | 0.0020373 | 3.08116  | 0.00481675 |
| A_51_P463765 | TIMP3                | TIMP metalloproteinase inhibitor 3                             | -3.48711 | 3.51E-11  | -2.13303 | 7.25E-07   |
| A_51_P145220 | Nefm                 | neurofilament, medium polypeptide                              | -3.48611 | 4.30E-08  | 3.30983  | 9.47E-08   |
| A_52_P323797 | IFNE                 | interferon, epsilon                                            | -3.46849 | 0.0083579 | -5.47938 | 0.00057754 |
| A_51_P276787 | 1700018B24Rik        | enhancer of rudimentary homolog pseudogene                     | -3.46512 | 5.74E-08  | 2.34096  | 2.71E-05   |
| A_52_P88033  | MYH7                 | myosin, heavy chain 7, cardiac muscle, beta                    | -3.46405 | 1.15E-09  | 12.2217  | 6.76E-17   |
| A_52_P670263 | TFPI                 | tissue factor pathway inhibitor (lipoprotein-associated coagu  | -3.45678 | 2.03E-09  | 3.37731  | 2.99E-09   |
| A_52_P141306 | Ott (includes others | ovary testis transcribed                                       | -3.44702 | 3.18E-07  | 5.41056  | 7.70E-10   |
| A_51_P139184 | FANK1                | fibronectin type III and ankyrin repeat domains 1              | -3.4439  | 1.60E-08  | 2.04825  | 9.84E-05   |
| A_51_P262841 | STAMBPL1             | STAM binding protein-like 1                                    | -3.44015 | 2.50E-05  | -3.23544 | 4.96E-05   |
| A_51_P407028 | CA4                  | carbonic anhydrase IV                                          | -3.43479 | 0.0013735 | -3.76773 | 0.00068075 |
| A_51_P510485 | SFI1                 | SFI1 centrin binding protein                                   | -3.4264  | 9.49E-12  | 1.62222  | 0.00016168 |
| A_51_P384230 | SGK2                 | serum/glucocorticoid regulated kinase 2                        | -3.42401 | 9.91E-16  | -1.88817 | 4.41E-09   |
| A_51_P194853 | SEC14L4              | SEC14-like lipid binding 4                                     | -3.42361 | 7.54E-11  | -1.83064 | 3.03E-05   |
| A_52_P479249 | THY1                 | Thy-1 cell surface antigen                                     | -3.42285 | 1.95E-10  | -2.46348 | 1.02E-07   |
| A_51_P497768 | GPAT2                | glycerol-3-phosphate acyltransferase 2, mitochondrial          | -3.42262 | 4.73E-15  | 1.83083  | 3.91E-08   |
| A_51_P338664 | HIST1H2BD            | histone cluster 1, H2bd                                        | -3.41477 | 1.88E-08  | 3.78162  | 3.85E-09   |
| A_52_P101399 | TMEM130              | transmembrane protein 130                                      | -3.40596 | 4.89E-13  | 2.3444   | 1.71E-09   |
| A_51_P511927 | SLC47A1              | solute carrier family 47 (multidrug and toxin extrusion), men  | -3.40424 | 8.33E-20  | -2.49273 | 1.83E-16   |
| A_51_P399305 | TNFRSF19             | tumor necrosis factor receptor superfamily, member 19          | -3.40081 | 5.10E-09  | -1.6563  | 0.00195688 |
| A_51_P468073 | GGT1                 | gamma-glutamyltransferase 1                                    | -3.4     | 2.19E-10  | -2.23844 | 7.34E-07   |
| A_51_P173141 | 2410024N13Rik        | RIKEN cDNA 2410024N13 gene                                     | -3.39923 | 1.69E-06  | 2.13315  | 0.00085447 |
| A_52_P312595 |                      |                                                                | -3.3953  | 4.22E-09  | -2.20513 | 9.00E-06   |
| A_51_P380844 | Pramel3 (includes c  | preferentially expressed antigen in melanoma-like 3            | -3.38572 | 1.44E-06  | 11.0652  | 1.48E-12   |
| A_51_P431046 | ST8SIA3              | ST8 alpha-N-acetyl-neuraminidase alpha-2,8-sialyltransferase : | -3.38205 | 1.21E-07  | -2.40367 | 2.36E-05   |
| A_51_P384318 | C1R                  | complement component 1, r subcomponent                         | -3.37695 | 4.73E-08  | 9.51836  | 6.27E-14   |
| A_51_P220806 | GDF9                 | growth differentiation factor 9                                | -3.3748  | 7.80E-10  | -2.30423 | 9.89E-07   |
| A_51_P183571 | SERPINE1             | serpin peptidase inhibitor, clade E (nexin, plasminogen activ  | -3.36988 | 7.33E-13  | 1.64473  | 2.33E-05   |
| A_51_P235687 | ALOX5AP              | arachidonate 5-lipoxygenase-activating protein                 | -3.36948 | 1.40E-11  | -2.67648 | 1.39E-09   |
| A_51_P452768 | CYP4F12              | cytochrome P450, family 4, subfamily F, polypeptide 12         | -3.36915 | 0.0001414 | 10.5756  | 2.71E-09   |
| A_51_P270904 | PLEKHS1              | pleckstrin homology domain containing, family S member 1       | -3.36378 | 8.87E-08  | 2.79218  | 1.60E-06   |
| A_52_P433450 |                      |                                                                | -3.35818 | 9.25E-11  | 1.5593   | 0.00100027 |
| A_52_P515247 | ARHGDI3              | Rho GDP dissociation inhibitor (GDI) beta                      | -3.356   | 9.79E-15  | 3.46065  | 5.23E-15   |
| A_51_P334072 | Cyct                 | cytochrome c, testis                                           | -3.35524 | 1.60E-09  | 1.57604  | 0.0026674  |
| A_51_P224493 |                      |                                                                | -3.35001 | 0.0018173 | -3.86527 | 0.0006225  |
| A_51_P258901 | PIFO                 | primary cilia formation                                        | -3.34962 | 1.76E-05  | -2.88189 | 0.00010179 |
| A_51_P471659 | Alox12e              | arachidonate lipoxygenase, epidermal                           | -3.34803 | 8.72E-07  | -3.65221 | 2.64E-07   |
| A_51_P405912 | LMCD1                | LIM and cysteine-rich domains 1                                | -3.3441  | 9.83E-05  | -2.0153  | 0.0136028  |
| A_51_P282616 | MAATS1               | MYCBP-associated, testis expressed 1                           | -3.34122 | 3.67E-09  | 1.66171  | 0.00139788 |
| A_51_P150653 | Ptpv                 | protein tyrosine phosphatase, receptor type, V                 | -3.33895 | 2.41E-10  | 12.343   | 4.12E-18   |
| A_51_P286798 | MAGEL2               | melanoma antigen family L2                                     | -3.33852 | 2.80E-06  | -1.72489 | 0.0133404  |
| A_52_P607060 | Neb1                 | nebulin                                                        | -3.3244  | 0.0002636 | -3.27446 | 0.00030373 |
| A_51_P293736 | TSGA10IP             | testis specific, 10 interacting protein                        | -3.32268 | 1.94E-12  | -2.40191 | 2.09E-09   |
| A_52_P100156 | KRT12                | keratin 12, type I                                             | -3.31887 | 0.0077381 | 4.1024   | 0.00217037 |
| A_52_P430194 | SMOX                 | spermine oxidase                                               | -3.31329 | 1.07E-06  | 3.02707  | 3.77E-06   |

|              |                                               |                                                                |          |           |          |            |
|--------------|-----------------------------------------------|----------------------------------------------------------------|----------|-----------|----------|------------|
| A_52_P194531 | Gm7972                                        | predicted gene 7972                                            | -3.31279 | 3.92E-13  | 1.98353  | 6.69E-08   |
| A_51_P352076 | ITGAE                                         | integrin, alpha E (antigen CD103, human mucosal lymphocyt      | -3.3111  | 7.15E-08  | -2.01709 | 0.00022111 |
| A_52_P214042 | ZBTB46                                        | zinc finger and BTB domain containing 46                       | -3.30891 | 2.31E-08  | -1.92706 | 0.00023933 |
| A_52_P192462 | RIMS1                                         | regulating synaptic membrane exocytosis 1                      | -3.30866 | 0.0008864 | 2.98225  | 0.0020596  |
| A_51_P160536 | CFAP161                                       | cilia and flagella associated protein 161                      | -3.30489 | 2.32E-05  | -4.22916 | 1.36E-06   |
| A_52_P236813 | UBE2W                                         | ubiquitin-conjugating enzyme E2W (putative)                    | -3.29746 | 0.0001046 | -2.37068 | 0.00288228 |
| A_51_P478419 | UNC45B                                        | unc-45 myosin chaperone B                                      | -3.29714 | 4.24E-09  | 7.5683   | 2.60E-14   |
| A_51_P506328 | CYP2J2                                        | cytochrome P450, family 2, subfamily J, polypeptide 2          | -3.29544 | 1.69E-07  | 2.64354  | 5.07E-06   |
| A_52_P545010 | SLC39A11                                      | solute carrier family 39, member 11                            | -3.28994 | 1.08E-14  | -2.93891 | 1.26E-13   |
| A_51_P283766 | PLXDC1                                        | plexin domain containing 1                                     | -3.28379 | 3.36E-14  | -4.86986 | 2.36E-17   |
| A_52_P625215 | WFIKKN2                                       | WAP, follistatin/kazal, immunoglobulin, kunitz and netrin do   | -3.28363 | 0.0021335 | 3.69858  | 0.00088154 |
| A_52_P259537 | GCK                                           | glucokinase (hexokinase 4)                                     | -3.27946 | 7.49E-11  | -4.47117 | 3.49E-13   |
| A_51_P274461 | Ott (includes others:ovary testis transcribed |                                                                | -3.27758 | 3.62E-07  | 6.84892  | 2.07E-11   |
| A_52_P654118 | UTRN                                          | utrophin                                                       | -3.27166 | 3.72E-06  | -4.92545 | 2.08E-08   |
| A_51_P514319 | SLC13A4                                       | solute carrier family 13 (sodium/sulfate symporter), membe     | -3.26889 | 4.15E-14  | -1.77346 | 2.60E-07   |
| A_52_P117510 | MYH6                                          | myosin, heavy chain 6, cardiac muscle, alpha                   | -3.26314 | 0.0003563 | 3.51114  | 0.00018065 |
| A_51_P420489 | ACOT1                                         | acyl-CoA thioesterase 1                                        | -3.26272 | 1.57E-12  | -1.56936 | 9.15E-05   |
| A_51_P280117 | PADI2                                         | peptidyl arginine deiminase, type II                           | -3.25159 | 8.87E-07  | -2.15951 | 0.00032654 |
| A_51_P222467 | ABCG1                                         | ATP-binding cassette, sub-family G (WHITE), member 1           | -3.23109 | 9.43E-12  | 1.53684  | 0.00035578 |
| A_52_P399204 | AMDHD1                                        | amidohydrolase domain containing 1                             | -3.22966 | 0.0037522 | -2.60923 | 0.0151941  |
| A_52_P66524  | CCDC63                                        | coiled-coil domain containing 63                               | -3.22532 | 3.84E-05  | 1.95226  | 0.00941305 |
| A_52_P883821 | A730011C13Rik                                 | RIKEN cDNA A730011C13 gene                                     | -3.2226  | 0.0050527 | -3.7516  | 0.00185187 |
| A_52_P435561 | PRR15L                                        | proline rich 15-like                                           | -3.22171 | 1.74E-07  | 5.9547   | 3.21E-11   |
| A_52_P639452 | MMS19                                         | MMS19 homolog, cytosolic iron-sulfur assembly component        | -3.21966 | 0.0016351 | -2.88691 | 0.00376011 |
| A_51_P114616 | BATF                                          | basic leucine zipper transcription factor, ATF-like            | -3.21942 | 1.73E-08  | 1.69012  | 0.00158725 |
| A_52_P577819 | ST6GALNAC2                                    | ST6 (alpha-N-acetyl-neuraminyl-2,3-beta-galactosyl-1,3)-N-a    | -3.20575 | 8.22E-05  | -2.71589 | 0.00048406 |
| A_52_P198473 | PCGF5                                         | polycomb group ring finger 5                                   | -3.20574 | 0.0003241 | -2.33989 | 0.00576544 |
| A_52_P154741 | Lgals6                                        | lectin, galactose binding, soluble 6                           | -3.19379 | 3.11E-08  | 3.76306  | 2.25E-09   |
| A_52_P646858 | CA12                                          | carbonic anhydrase XII                                         | -3.1917  | 0.001402  | 7.02798  | 2.06E-06   |
| A_51_P318755 | TMC5                                          | transmembrane channel-like 5                                   | -3.18155 | 4.14E-09  | -2.45439 | 4.86E-07   |
| A_52_P616544 | Ptprv                                         | protein tyrosine phosphatase, receptor type, V                 | -3.18068 | 5.97E-05  | 14.6745  | 1.24E-11   |
| A_51_P378051 | AOC3                                          | amine oxidase, copper containing 3                             | -3.1792  | 4.34E-07  | -17.6598 | 8.91E-16   |
| A_52_P557360 | MTUS2                                         | microtubule associated tumor suppressor candidate 2            | -3.17344 | 7.10E-05  | 1.92851  | 0.0131487  |
| A_51_P485400 | GTSF1                                         | gametocyte specific factor 1                                   | -3.17103 | 1.48E-08  | 1.87613  | 0.00019589 |
| A_51_P494751 | MAEL                                          | maelstrom spermatogenic transposon silencer                    | -3.17028 | 4.77E-14  | 1.62001  | 3.24E-06   |
| A_51_P228971 | Slc5a4b                                       | solute carrier family 5 (neutral amino acid transporters, syst | -3.17024 | 7.42E-10  | -1.76184 | 0.00011917 |
| A_51_P188126 | GCA                                           | grancalcin, EF-hand calcium binding protein                    | -3.1672  | 1.45E-11  | 2.40461  | 5.21E-09   |
| A_51_P313320 | CD6                                           | CD6 molecule                                                   | -3.16321 | 1.06E-09  | -2.7696  | 1.28E-08   |
| A_52_P407946 |                                               |                                                                | -3.16202 | 2.97E-05  | -2.92618 | 7.42E-05   |
| A_52_P334562 | VDR                                           | vitamin D (1,25- dihydroxyvitamin D3) receptor                 | -3.15669 | 0.0040667 | 5.50619  | 7.33E-05   |
| A_51_P450406 | Muc3                                          | mucin 3, intestinal                                            | -3.1523  | 1.51E-08  | 5.51901  | 2.84E-12   |
| A_52_P247185 | Masp1                                         | mannan-binding lectin serine peptidase 1                       | -3.1516  | 3.69E-05  | 3.56534  | 8.76E-06   |
| A_51_P186476 | SLC11A1                                       | solute carrier family 11 (proton-coupled divalent metal ion t  | -3.14782 | 4.27E-13  | -2.61244 | 2.67E-11   |
| A_51_P420276 | PLXDC2                                        | plexin domain containing 2                                     | -3.14723 | 1.31E-11  | 6.77669  | 4.50E-17   |
| A_51_P471619 | ACTL7B                                        | actin-like 7B                                                  | -3.14377 | 5.22E-06  | 2.18382  | 0.00066641 |
| A_51_P449325 | HLA-DOA                                       | major histocompatibility complex, class II, DO alpha           | -3.12804 | 5.25E-09  | -1.89886 | 7.14E-05   |
| A_51_P408172 | Col6a4                                        | collagen, type VI, alpha 4                                     | -3.12245 | 3.24E-14  | 7.26465  | 1.88E-20   |
| A_51_P454873 | NPY                                           | neuropeptide Y                                                 | -3.11777 | 1.38E-06  | -2.63599 | 1.59E-05   |
| A_52_P229278 | LIMCH1                                        | LIM and calponin homology domains 1                            | -3.11583 | 7.18E-06  | 10.9486  | 3.50E-12   |
| A_52_P175757 |                                               |                                                                | -3.11441 | 5.37E-05  | 2.02769  | 0.0061869  |
| A_52_P586679 | SIX1                                          | SIX homeobox 1                                                 | -3.11149 | 6.01E-12  | -2.36159 | 2.66E-09   |
| A_51_P113322 | Nlrp4a                                        | NLR family, pyrin domain containing 4A                         | -3.10847 | 2.43E-06  | -4.07733 | 5.93E-08   |
| A_52_P85040  | MOG                                           | myelin oligodendrocyte glycoprotein                            | -3.10773 | 0.0016959 | -3.80486 | 0.00032856 |

|               |               |                                                               |          |           |          |            |
|---------------|---------------|---------------------------------------------------------------|----------|-----------|----------|------------|
| A_51_P165304  | 9630041G16Rik | RIKEN cDNA 9630041G16 gene                                    | -3.10732 | 0.000592  | 3.51747  | 0.00018956 |
| A_51_P402909  | NCF2          | neutrophil cytosolic factor 2                                 | -3.1069  | 1.41E-11  | 3.18904  | 8.34E-12   |
| A_51_P185593  | SYNM          | synemin, intermediate filament protein                        | -3.09703 | 2.92E-06  | 13.7542  | 8.64E-14   |
| A_51_P490286  | Cngb1         | cyclic nucleotide gated channel beta 1                        | -3.09564 | 2.06E-08  | -1.94188 | 9.87E-05   |
| A_52_P220783  | TMEM229B      | transmembrane protein 229B                                    | -3.09396 | 3.69E-14  | 1.57613  | 4.91E-06   |
| A_51_P335051  | BHMT          | betaine--homocysteine S-methyltransferase                     | -3.08779 | 2.78E-06  | 2.01453  | 0.00111925 |
| A_51_P124315  | HMCN2         | hemicentin 2                                                  | -3.08417 | 2.05E-08  | 5.2702   | 4.96E-12   |
| A_51_P463536  | MEOX1         | mesenchyme homeobox 1                                         | -3.06406 | 0.0003137 | -10.832  | 1.71E-09   |
| A_52_P543869  | SHPK          | sedoheptulokinase                                             | -3.05393 | 0.0080781 | 14.2909  | 2.23E-07   |
| A_52_P237871  | EZH1          | enhancer of zeste 1 polycomb repressive complex 2 subunit     | -3.05346 | 1.19E-09  | -1.7235  | 0.00016863 |
| A_51_P202801  | ABCB9         | ATP-binding cassette, sub-family B (MDR/TAP), member 9        | -3.05232 | 2.33E-12  | -1.62516 | 1.98E-05   |
| A_51_P322658  | Plcx1         | phosphatidylinositol-specific phospholipase C, X domain con   | -3.05185 | 1.73E-09  | 2.24739  | 7.32E-07   |
| A_51_P414889  | IFI35         | interferon-induced protein 35                                 | -3.04426 | 4.54E-13  | -1.71035 | 1.47E-06   |
| A_51_P338072  | MYH4          | myosin, heavy chain 4, skeletal muscle                        | -3.04134 | 3.90E-07  | 2.40761  | 1.62E-05   |
| A_52_P631189  | VPS13A        | vacuolar protein sorting 13 homolog A (S. cerevisiae)         | -3.03958 | 2.40E-07  | -6.5076  | 4.97E-12   |
| A_51_P249930  | TCEAL1        | transcription elongation factor A (SII)-like 1                | -3.02916 | 1.10E-07  | 1.59715  | 0.00583948 |
| A_51_P448664  | TBXAS1        | thromboxane A synthase 1 (platelet)                           | -3.02823 | 0.0001955 | -3.0028  | 0.00021349 |
| A_52_P310548  | Nlrp4a        | NLR family, pyrin domain containing 4A                        | -3.01613 | 1.63E-07  | -2.89071 | 3.26E-07   |
| A_52_P955235  |               |                                                               | -3.01537 | 3.73E-06  | -1.8482  | 0.00347095 |
| A_52_P90805   | LRRC15        | leucine rich repeat containing 15                             | -3.01376 | 9.84E-08  | 2.34688  | 7.16E-06   |
| A_51_P465449  | MYBPC3        | myosin binding protein C, cardiac                             | -2.99871 | 1.51E-09  | -2.92789 | 2.39E-09   |
| A_51_P220422  | PACSN1        | protein kinase C and casein kinase substrate in neurons 1     | -2.99307 | 5.61E-11  | -1.81972 | 5.47E-06   |
| A_51_P244127  | TKTL1         | transketolase-like 1                                          | -2.99103 | 0.0089746 | 5.84943  | 0.00010083 |
| A_51_P480311  | F2            | coagulation factor II (thrombin)                              | -2.98747 | 1.86E-12  | -1.59576 | 2.25E-05   |
| A_52_P65408   | CTNNA1        | catenin (cadherin-associated protein), alpha-like 1           | -2.98531 | 1.12E-07  | -2.98385 | 1.13E-07   |
| A_52_P274084  | C330024D21Rik | RIKEN cDNA C330024D21 gene                                    | -2.96046 | 7.13E-06  | 2.14258  | 0.0006114  |
| A_52_P99848   | PIK3CD        | phosphatidylinositol-4,5-bisphosphate 3-kinase, catalytic sul | -2.95761 | 8.72E-11  | -4.11599 | 1.81E-13   |
| A_51_P289058  | Cryge/Crygf   | crystallin, gamma F                                           | -2.94983 | 1.14E-11  | 5.26491  | 3.27E-16   |
| A_51_P278893  | HDAC5         | histone deacetylase 5                                         | -2.94364 | 1.39E-12  | -1.64775 | 5.89E-06   |
| A_51_P148828  | FGF1          | fibroblast growth factor 1 (acidic)                           | -2.94352 | 0.0082926 | 2.79363  | 0.0115343  |
| A_51_P487404  | MYBPC1        | myosin binding protein C, slow type                           | -2.94344 | 9.95E-05  | 2.19785  | 0.00260022 |
| A_51_P385849  | CYP4F22       | cytochrome P450, family 4, subfamily F, polypeptide 22        | -2.9321  | 0.0002602 | 5.7192   | 2.35E-07   |
| A_51_P118012  | PRKCA         | protein kinase C, alpha                                       | -2.93117 | 3.65E-05  | -2.08574 | 0.002326   |
| A_52_P549827  | MGST1         | microsomal glutathione S-transferase 1                        | -2.92895 | 1.55E-07  | -2.46642 | 2.94E-06   |
| A_52_P577084  | SRD5A1        | steroid-5-alpha-reductase, alpha polypeptide 1 (3-oxo-5 alp   | -2.92192 | 6.40E-09  | -3.80058 | 6.14E-11   |
| A_51_P481768  | Tcstv1        | 2-cell-stage, variable group, member 1                        | -2.9217  | 0.0004253 | 7.82283  | 2.38E-08   |
| A_52_P1163607 | 4930433E05Rik | RIKEN cDNA 4930433E05 gene                                    | -2.91841 | 0.0055005 | -3.51969 | 0.00144025 |
| A_51_P457196  | SFRP4         | secreted frizzled-related protein 4                           | -2.91813 | 4.36E-13  | -1.79899 | 1.56E-07   |
| A_51_P218345  | PAK3          | p21 protein (Cdc42/Rac)-activated kinase 3                    | -2.91478 | 4.74E-05  | 3.13233  | 1.96E-05   |
| A_52_P220824  | D030068K23Rik | RIKEN cDNA D030068K23 gene                                    | -2.91029 | 3.53E-05  | -3.08366 | 1.70E-05   |
| A_51_P119387  | TM4SF5        | transmembrane 4 L six family member 5                         | -2.91013 | 2.84E-12  | -3.09683 | 7.48E-13   |
| A_52_P407198  | A430060F13Rik | RIKEN cDNA A430060F13 gene                                    | -2.90099 | 7.36E-05  | 9.11711  | 2.17E-10   |
| A_52_P569324  | ACSS1         | acyl-CoA synthetase short-chain family member 1               | -2.89866 | 0.0001703 | -2.90837 | 0.00016414 |
| A_51_P508919  | TAS1R1        | taste receptor, type 1, member 1                              | -2.89781 | 1.88E-11  | 4.51643  | 4.37E-15   |
| A_51_P364592  | ZIC2          | Zic family member 2                                           | -2.89418 | 2.01E-07  | -4.42917 | 2.52E-10   |
| A_51_P495825  | APOF          | apolipoprotein F                                              | -2.88401 | 3.44E-10  | -4.34982 | 1.86E-13   |
| A_51_P182106  | UNC5CL        | unc-5 family C-terminal like                                  | -2.8811  | 1.58E-10  | -2.10078 | 1.88E-07   |
| A_51_P403705  | 2610100L16Rik | RIKEN cDNA 2610100L16 gene                                    | -2.87829 | 7.91E-06  | -3.21641 | 1.67E-06   |
| A_52_P413034  | ITGA7         | integrin, alpha 7                                             | -2.87401 | 0.0003901 | -2.42781 | 0.00212835 |
| A_52_P281186  | MEP1B         | mepripin A, beta                                              | -2.8726  | 7.11E-06  | -1.74705 | 0.00705702 |
| A_51_P332136  | ZMAT5         | zinc finger, matrin-type 5                                    | -2.87129 | 3.90E-12  | -1.51652 | 9.56E-05   |
| A_52_P215798  | TEX12         | testis expressed 12                                           | -2.86972 | 4.42E-05  | 2.43703  | 0.00033799 |
| A_52_P586928  | PDYN          | prodynorphin                                                  | -2.86841 | 5.61E-09  | -2.15351 | 1.81E-06   |

|               |                  |                                                              |          |           |          |            |
|---------------|------------------|--------------------------------------------------------------|----------|-----------|----------|------------|
| A_52_P326713  | CCL25            | chemokine (C-C motif) ligand 25                              | -2.86735 | 1.14E-06  | -3.41365 | 7.77E-08   |
| A_51_P108020  | ZMYND15          | zinc finger, MYND-type containing 15                         | -2.86505 | 6.53E-09  | 1.81271  | 7.69E-05   |
| A_51_P249274  | 1300017J02Rik    | RIKEN cDNA 1300017J02 gene                                   | -2.8647  | 3.18E-06  | 2.0488   | 0.00048114 |
| A_52_P432969  | PCDH19           | protocadherin 19                                             | -2.86364 | 9.41E-11  | 1.61636  | 9.01E-05   |
| A_52_P1052029 |                  |                                                              | -2.86061 | 0.0018978 | -2.74168 | 0.00270922 |
| A_51_P305770  | EMILIN2          | elastin microfibril interfacier 2                            | -2.85262 | 1.97E-11  | 3.05481  | 4.61E-12   |
| A_52_P6070    | EVA1C            | eva-1 homolog C (C. elegans)                                 | -2.84867 | 0.0059237 | 10.2207  | 3.57E-07   |
| A_52_P386544  | Rpl39l           | ribosomal protein L39-like                                   | -2.84593 | 1.25E-10  | 2.13811  | 8.19E-08   |
| A_51_P210510  | SPARCL1          | SPARC-like 1 (hevin)                                         | -2.83872 | 0.0001601 | 2.93087  | 0.00011139 |
| A_51_P442894  | Aldh3b2          | aldehyde dehydrogenase 3 family, member B2                   | -2.83733 | 2.36E-05  | -1.94378 | 0.00320614 |
| A_52_P779182  | Gm4349           | SET domain, bifurcated 1 pseudogene                          | -2.83576 | 4.41E-09  | -3.3479  | 1.97E-10   |
| A_52_P544052  | BAZ2B            | bromodomain adjacent to zinc finger domain, 2B               | -2.83356 | 9.50E-08  | -1.64208 | 0.00209013 |
| A_52_P614517  | RHOBTB1          | Rho-related BTB domain containing 1                          | -2.83053 | 6.87E-09  | -1.82797 | 5.73E-05   |
| A_51_P335491  | SGCA             | sarcoglycan, alpha (50kDa dystrophin-associated glycoprote   | -2.82128 | 8.40E-06  | 2.66744  | 1.87E-05   |
| A_52_P643674  | EDARADD          | EDAR-associated death domain                                 | -2.80875 | 8.80E-05  | 8.75981  | 2.25E-10   |
| A_52_P10793   | PTN              | pleiotrophin                                                 | -2.80565 | 1.97E-05  | -2.03796 | 0.00143161 |
| A_51_P172502  | CXCL12           | chemokine (C-X-C motif) ligand 12                            | -2.80351 | 0.0067726 | -5.44155 | 4.72E-05   |
| A_51_P114917  | DOCK2            | dedicator of cytokinesis 2                                   | -2.8     | 0.0009755 | -5.0562  | 3.16E-06   |
| A_52_P508962  | KCNAB2           | potassium channel, voltage gated subfamily A regulatory be   | -2.79979 | 5.29E-05  | 1.92596  | 0.00518099 |
| A_52_P148069  | CAP2             | CAP, adenylate cyclase-associated protein, 2 (yeast)         | -2.79003 | 0.0014885 | -2.76834 | 0.00159593 |
| A_51_P153581  | Dmrtc1c1/Dmrtc1c | DMRT-like family C1c2                                        | -2.78515 | 2.10E-12  | 10.4296  | 1.27E-21   |
| A_52_P235880  | Gm5134           | predicted gene 5134                                          | -2.77504 | 0.0018285 | -2.79421 | 0.00172178 |
| A_51_P363947  | CDKN1A           | cyclin-dependent kinase inhibitor 1A (p21, Cip1)             | -2.77443 | 1.35E-11  | 8.2224   | 1.74E-19   |
| A_52_P29151   | ANKRD44          | ankyrin repeat domain 44                                     | -2.77355 | 7.07E-09  | -1.56881 | 0.00121582 |
| A_51_P355906  | KIT              | v-kit Hardy-Zuckerman 4 feline sarcoma viral oncogene hom    | -2.77246 | 7.98E-10  | -2.50707 | 6.76E-09   |
| A_51_P202714  | CTNNA1           | catenin (cadherin-associated protein), alpha-like 1          | -2.76266 | 4.43E-10  | -2.7574  | 4.61E-10   |
| A_52_P778581  | 1700043A12Rik    | RIKEN cDNA 1700043A12 gene                                   | -2.76248 | 0.0006717 | -3.21196 | 0.00014589 |
| A_51_P337883  | TRPT1            | tRNA phosphotransferase 1                                    | -2.76148 | 0.0047733 | -3.85331 | 0.00034722 |
| A_51_P500981  | MAP7             | microtubule-associated protein 7                             | -2.76055 | 2.07E-12  | -1.91587 | 2.98E-08   |
| A_52_P193555  | TP73             | tumor protein p73                                            | -2.75875 | 9.87E-07  | 17.1267  | 1.42E-16   |
| A_51_P324450  | Pbp2             | phosphatidylethanolamine binding protein 2                   | -2.75838 | 0.0005234 | 2.10048  | 0.00780696 |
| A_51_P450752  | PLA2G4B          | phospholipase A2, group IVB (cytosolic)                      | -2.75743 | 9.51E-10  | 2.85691  | 4.59E-10   |
| A_52_P258116  | WNT3             | wingless-type MMTV integration site family, member 3         | -2.7571  | 0.005453  | 45.948   | 5.29E-12   |
| A_52_P629748  | Notumos          | notum pectinacetyltransferase homolog (Drosophila), opposite | -2.75212 | 2.68E-13  | -5.01072 | 2.05E-18   |
| A_51_P340987  | GARNL3           | GTPase activating Rap/RanGAP domain-like 3                   | -2.74828 | 1.51E-14  | -2.73081 | 1.76E-14   |
| A_51_P342031  | MKRN3            | makorin ring finger protein 3                                | -2.7426  | 3.12E-09  | 1.70001  | 0.0001192  |
| A_51_P440238  | GGT6             | gamma-glutamyltransferase 6                                  | -2.73991 | 2.51E-11  | 2.54861  | 1.32E-10   |
| A_51_P161265  | CCL25            | chemokine (C-C motif) ligand 25                              | -2.73964 | 1.25E-06  | -3.36034 | 4.82E-08   |
| A_51_P448479  | SLC10A4          | solute carrier family 10, member 4                           | -2.73872 | 0.001525  | 2.52289  | 0.00318354 |
| A_51_P503247  | IQCF5            | IQ motif containing F5                                       | -2.73391 | 1.15E-07  | -1.66023 | 0.00137395 |
| A_52_P271859  | FIGNL1           | fidgetin-like 1                                              | -2.73126 | 0.0041332 | -2.88083 | 0.00271684 |
| A_52_P541118  | Snhg11           | small nucleolar RNA host gene 11                             | -2.7218  | 3.49E-06  | -1.98023 | 0.00050552 |
| A_51_P502580  | TRIM16           | tripartite motif containing 16                               | -2.71983 | 2.13E-12  | -1.9343  | 1.73E-08   |
| A_52_P232763  | MAP7             | microtubule-associated protein 7                             | -2.71911 | 1.33E-12  | -2.36209 | 4.37E-11   |
| A_52_P53144   | GCNT3            | glucosaminyl (N-acetyl) transferase 3, mucin type            | -2.71119 | 0.0015581 | -2.13012 | 0.0128745  |
| A_52_P109548  | MAP7             | microtubule-associated protein 7                             | -2.70969 | 5.89E-09  | -1.87674 | 1.62E-05   |
| A_52_P292937  | SLC4A8           | solute carrier family 4, sodium bicarbonate cotransporter, m | -2.70882 | 1.71E-08  | 4.96479  | 5.25E-13   |
| A_52_P93910   | NRP2             | neuropilin 2                                                 | -2.70432 | 5.89E-08  | -2.93284 | 1.31E-08   |
| A_52_P666268  | Rbfox3           | RNA binding protein, fox-1 homolog (C. elegans) 3            | -2.70285 | 5.74E-05  | -1.93059 | 0.00404216 |
| A_51_P500643  | CREB3L2          | cAMP responsive element binding protein 3-like 2             | -2.70225 | 1.94E-10  | -4.31872 | 2.33E-14   |
| A_51_P265219  | PPM1K            | protein phosphatase, Mg2+/Mn2+ dependent, 1K                 | -2.69922 | 2.03E-05  | -4.40342 | 2.57E-08   |
| A_51_P387528  | AK7              | adenylate kinase 7                                           | -2.69652 | 1.63E-13  | -2.41764 | 2.62E-12   |
| A_52_P360308  | OSBPL3           | oxysterol binding protein-like 3                             | -2.69625 | 2.34E-05  | -2.06312 | 0.00094213 |

|               |                    |                                                               |          |           |          |            |
|---------------|--------------------|---------------------------------------------------------------|----------|-----------|----------|------------|
| A_52_P391151  | ASIC2              | acid sensing (proton gated) ion channel 2                     | -2.69565 | 0.0002392 | -7.93804 | 1.52E-09   |
| A_51_P298259  | Gm6551 (includes c | predicted gene 6551                                           | -2.69267 | 7.34E-12  | -4.42009 | 3.63E-16   |
| A_52_P602147  | MYH4               | myosin, heavy chain 4, skeletal muscle                        | -2.69202 | 3.47E-09  | 2.38208  | 4.61E-08   |
| A_52_P572765  | DTNA               | dystrobrevin, alpha                                           | -2.68873 | 0.0062628 | -2.90747 | 0.0034953  |
| A_52_P345417  | BCL2L10            | BCL2-like 10 (apoptosis facilitator)                          | -2.68777 | 0.0002135 | 7.5592   | 1.91E-09   |
| A_52_P305539  | KNG1               | kininogen 1                                                   | -2.68619 | 0.0001655 | -2.72648 | 0.0001385  |
| A_52_P125485  | Slc25a48           | solute carrier family 25, member 48                           | -2.6858  | 0.0021556 | -2.78856 | 0.00154595 |
| A_51_P349988  | Ggta1              | glycoprotein galactosyltransferase alpha 1, 3                 | -2.68154 | 1.66E-16  | 1.69091  | 5.45E-10   |
| A_52_P556134  | IARS2              | isoleucyl-tRNA synthetase 2, mitochondrial                    | -2.67988 | 2.24E-05  | -5.21648 | 2.98E-09   |
| A_52_P344949  | GBP6               | guanylate binding protein family, member 6                    | -2.67913 | 5.98E-05  | -2.80157 | 3.33E-05   |
| A_51_P123745  | SPNS2              | spinster homolog 2 (Drosophila)                               | -2.6739  | 9.32E-09  | 3.35758  | 1.19E-10   |
| A_51_P281778  | IGSF23             | immunoglobulin superfamily, member 23                         | -2.6738  | 5.75E-08  | -2.51566 | 1.85E-07   |
| A_51_P152765  | STAT5A             | signal transducer and activator of transcription 5A           | -2.66594 | 1.04E-07  | 2.69285  | 8.64E-08   |
| A_52_P257502  | IGFBP4             | insulin-like growth factor binding protein 4                  | -2.66482 | 0.0022726 | -8.51124 | 5.45E-08   |
| A_51_P487389  | DRC3               | dynein regulatory complex subunit 3                           | -2.65718 | 1.00E-05  | -5.91342 | 1.61E-10   |
| A_52_P996384  |                    |                                                               | -2.64563 | 0.0015798 | -2.41479 | 0.0036655  |
| A_51_P108266  | ACTN2              | actinin, alpha 2                                              | -2.64526 | 0.0001095 | 2.4897   | 0.00023436 |
| A_51_P245631  | RFTN2              | raftlin family member 2                                       | -2.64093 | 0.002537  | -2.48686 | 0.00426716 |
| A_51_P128973  | APOA2              | apolipoprotein A-II                                           | -2.64078 | 0.0018888 | -2.43053 | 0.00398931 |
| A_51_P287810  | MGST1              | microsomal glutathione S-transferase 1                        | -2.63872 | 6.40E-08  | -2.55872 | 1.16E-07   |
| A_52_P369761  | Nrg1               | neuregulin 1                                                  | -2.6377  | 8.92E-12  | -2.68949 | 5.64E-12   |
| A_52_P362161  | RAB3B              | RAB3B, member RAS oncogene family                             | -2.63037 | 1.83E-07  | -1.53747 | 0.00490342 |
| A_52_P380114  | CEP112             | centrosomal protein 112kDa                                    | -2.62791 | 0.0022082 | -5.78536 | 1.32E-06   |
| A_51_P383524  | ART3               | ADP-ribosyltransferase 3                                      | -2.62704 | 1.90E-06  | 33.2941  | 4.60E-19   |
| A_51_P343954  | PRRG4              | proline rich Gla (G-carboxyglutamic acid) 4 (transmembrane    | -2.6263  | 0.0003345 | 4.90866  | 2.62E-07   |
| A_52_P330245  | MYO3B              | myosin IIIB                                                   | -2.62388 | 0.0001514 | -2.67362 | 0.00012011 |
| A_51_P497100  | LGALS4             | lectin, galactoside-binding, soluble, 4                       | -2.62142 | 5.01E-09  | 2.31149  | 7.51E-08   |
| A_51_P380750  | CBFA2T3            | core-binding factor, runt domain, alpha subunit 2; translocat | -2.61593 | 6.58E-05  | 2.0202   | 0.00191351 |
| A_51_P232393  | MYO5C              | myosin VC                                                     | -2.61298 | 7.78E-10  | -2.20842 | 3.72E-08   |
| A_51_P143162  | MYH7               | myosin, heavy chain 7, cardiac muscle, beta                   | -2.61288 | 8.98E-07  | 11.6547  | 1.25E-15   |
| A_52_P393314  | P2RX7              | purinergic receptor P2X, ligand gated ion channel, 7          | -2.6127  | 7.23E-06  | 6.31532  | 2.98E-11   |
| A_51_P517215  | GRB14              | growth factor receptor-bound protein 14                       | -2.60912 | 1.17E-11  | -1.50277 | 6.94E-05   |
| A_52_P1169238 | Gm364              | predicted gene 364                                            | -2.60848 | 0.0010055 | 5.11073  | 9.42E-07   |
| A_52_P353417  | GM2A               | GM2 ganglioside activator                                     | -2.60342 | 6.98E-07  | -3.3485  | 9.52E-09   |
| A_51_P103298  | ZKSCAN2            | zinc finger with KRAB and SCAN domains 2                      | -2.59825 | 8.84E-06  | 1.88612  | 0.00121099 |
| A_51_P437068  | CNNM1              | cyclin and CBS domain divalent metal cation transport medi    | -2.59757 | 5.45E-06  | -1.65938 | 0.00606297 |
| A_51_P234847  | C5orf49            | chromosome 5 open reading frame 49                            | -2.59728 | 9.04E-06  | -1.76499 | 0.00323231 |
| A_51_P267751  | Hrc                | histidine rich calcium binding protein                        | -2.58912 | 0.0002964 | -3.52685 | 7.65E-06   |
| A_51_P149373  | FBXL20             | F-box and leucine-rich repeat protein 20                      | -2.58407 | 6.59E-07  | 2.71756  | 2.70E-07   |
| A_52_P515495  | SEMA4D             | sema domain, immunoglobulin domain (Ig), transmembrane        | -2.58393 | 2.29E-05  | -1.69284 | 0.00890134 |
| A_51_P141413  | CLEC10A            | C-type lectin domain family 10, member A                      | -2.58331 | 0.000208  | 17.6745  | 2.68E-13   |
| A_51_P106294  | GCK                | glucokinase (hexokinase 4)                                    | -2.57402 | 8.85E-07  | -3.24533 | 1.66E-08   |
| A_51_P461191  | GOT1L1             | glutamic-oxaloacetic transaminase 1-like 1                    | -2.56989 | 3.33E-09  | 1.85068  | 6.71E-06   |
| A_51_P190106  | RALGPS2            | Ral GEF with PH domain and SH3 binding motif 2                | -2.56797 | 3.31E-10  | -2.71525 | 9.47E-11   |
| A_51_P400217  | VPREB1             | pre-B lymphocyte 1                                            | -2.56646 | 1.96E-07  | 3.99587  | 8.49E-11   |
| A_52_P437488  | CCDC172            | coiled-coil domain containing 172                             | -2.56461 | 0.0011606 | 2.3408   | 0.0028758  |
| A_51_P493771  | C18orf25           | chromosome 18 open reading frame 25                           | -2.56187 | 0.0001133 | 2.24028  | 0.0006353  |
| A_52_P262462  | ANKRD34A           | ankyrin repeat domain 34A                                     | -2.56137 | 0.00124   | -7.31332 | 2.81E-08   |
| A_52_P598885  | SLC16A4            | solute carrier family 16, member 4                            | -2.56031 | 7.20E-08  | -2.62129 | 4.54E-08   |
| A_51_P442032  | CASK               | calcium/calmodulin-dependent serine protein kinase (MAGL      | -2.56016 | 2.42E-05  | -5.79074 | 3.43E-10   |
| A_52_P416072  | EPHX1              | epoxide hydrolase 1, microsomal (xenobiotic)                  | -2.55922 | 1.54E-12  | 6.72017  | 2.34E-20   |
| A_52_P424970  | ITGAL              | integrin, alpha L (antigen CD11A (p180), lymphocyte functio   | -2.55866 | 1.55E-07  | 1.66947  | 0.00075203 |
| A_51_P441426  | PF4                | platelet factor 4                                             | -2.55668 | 5.76E-07  | 5.94196  | 9.85E-13   |



|               |               |                                                            |          |           |          |            |
|---------------|---------------|------------------------------------------------------------|----------|-----------|----------|------------|
| A_52_P1036159 | Tip3          | transcribed intergenic polycomb 3                          | -2.55635 | 0.0001807 | 19.7648  | 6.03E-14   |
| A_51_P415395  | C2CD4B        | C2 calcium-dependent domain containing 4B                  | -2.55243 | 9.39E-08  | 1.89579  | 4.02E-05   |
| A_51_P161786  | SARM1         | sterile alpha and TIR motif containing 1                   | -2.55009 | 6.90E-07  | 1.59596  | 0.00359674 |
| A_51_P248629  | ARHGAP25      | Rho GTPase activating protein 25                           | -2.54866 | 0.0023561 | 2.67391  | 0.00151227 |
| A_51_P294610  |               |                                                            | -2.54512 | 0.0045465 | -5.07178 | 1.03E-05   |
| A_51_P349546  | CD109         | CD109 molecule                                             | -2.54142 | 6.64E-07  | 6.12964  | 6.85E-13   |
| A_52_P666855  | KSR1          | kinase suppressor of ras 1                                 | -2.53973 | 2.11E-08  | -3.27822 | 1.42E-10   |
| A_52_P12707   | PKD1L3        | polycystic kidney disease 1-like 3                         | -2.53799 | 7.60E-05  | -1.69739 | 0.0136875  |
| A_51_P231946  | 1700029P11Rik | RIKEN cDNA 1700029P11 gene                                 | -2.53596 | 2.49E-14  | 3.81504  | 2.26E-18   |
| A_52_P510821  | CNPY1         | canopy FGF signaling regulator 1                           | -2.53582 | 1.85E-13  | -1.90537 | 7.91E-10   |
| A_51_P248999  | TULP4         | tubby like protein 4                                       | -2.53474 | 1.39E-12  | 1.70657  | 1.62E-07   |
| A_52_P346256  | PTCD3         | pentatricopeptide repeat domain 3                          | -2.53397 | 2.78E-07  | -2.72153 | 7.29E-08   |
| A_52_P367147  | Dgkeos        | diacylglycerol kinase, epsilon, opposite strand            | -2.53189 | 4.31E-06  | -2.41116 | 9.71E-06   |
| A_51_P151214  | C8B           | complement component 8, beta polypeptide                   | -2.52524 | 0.0001504 | 2.6262   | 9.08E-05   |
| A_52_P679860  | HERC6         | HECT and RLD domain containing E3 ubiquitin protein ligase | -2.5235  | 0.0001122 | -2.75089 | 3.58E-05   |
| A_52_P601446  | TRIM27        | tripartite motif containing 27                             | -2.51796 | 1.53E-09  | 1.66964  | 3.85E-05   |
| A_52_P604130  | CDC37L1       | cell division cycle 37-like 1                              | -2.51127 | 1.20E-09  | -4.91757 | 3.46E-15   |
| A_51_P445677  | HHAT          | hedgehog acyltransferase                                   | -2.51121 | 0.0011074 | -2.00903 | 0.0102177  |
| A_51_P112627  | ST6GALNAC2    | ST6 (alpha-N-acetyl-neuraminy-2,3-beta-galactosyl-1,3)-N-a | -2.5102  | 1.02E-10  | -1.6924  | 4.09E-06   |
| A_52_P543079  | DHTKD1        | dehydrogenase E1 and transketolase domain containing 1     | -2.5013  | 0.000103  | -1.89064 | 0.00396286 |
| A_51_P261991  | BDNF          | brain-derived neurotrophic factor                          | -2.4986  | 2.51E-07  | 2.11935  | 6.46E-06   |
| A_51_P268563  | ENG           | endoglin                                                   | -2.49796 | 4.82E-11  | 3.79645  | 6.18E-15   |
| A_51_P257982  | USP29         | ubiquitin specific peptidase 29                            | -2.49697 | 0.0003907 | 2.24738  | 0.00133526 |
| A_51_P353934  | NKX2-4        | NK2 homeobox 4                                             | -2.49582 | 4.36E-08  | -3.79782 | 1.60E-11   |
| A_52_P547273  | DOCK4         | dedicator of cytokinesis 4                                 | -2.49499 | 0.0013381 | -2.57795 | 0.00095763 |
| A_52_P167382  | TMEM8A        | transmembrane protein 8A                                   | -2.4947  | 9.02E-14  | -3.57697 | 2.03E-17   |
| A_51_P487048  | Rhox6/Rhox9   | reproductive homeobox 9                                    | -2.49159 | 3.42E-07  | 4.48623  | 1.39E-11   |
| A_51_P130727  | FKBP11        | FK506 binding protein 11, 19 kDa                           | -2.49069 | 0.000273  | -8.00871 | 3.05E-10   |
| A_51_P515026  | MDFIC         | MyoD family inhibitor domain containing                    | -2.48825 | 8.60E-09  | 2.12295  | 3.09E-07   |
| A_51_P315785  | TNFAIP6       | tumor necrosis factor, alpha-induced protein 6             | -2.48588 | 0.0004271 | 10.9342  | 3.31E-11   |
| A_51_P271107  | MCF2          | MCF.2 cell line derived transforming sequence              | -2.48162 | 1.38E-06  | -3.23802 | 1.35E-08   |
| A_52_P369769  | Nrg1          | neuregulin 1                                               | -2.47771 | 6.93E-12  | -2.8383  | 2.57E-13   |
| A_52_P164797  | LCT           | lactase                                                    | -2.47745 | 8.58E-05  | 9.74715  | 3.94E-12   |
| A_51_P461779  | PPP2R2C       | protein phosphatase 2, regulatory subunit B, gamma         | -2.4769  | 2.36E-12  | 4.52366  | 7.04E-18   |
| A_52_P660100  | BCL2L14       | BCL2-like 14 (apoptosis facilitator)                       | -2.47544 | 1.40E-09  | -2.15521 | 3.82E-08   |
| A_52_P375312  | AMICA1        | adhesion molecule, interacts with CXADR antigen 1          | -2.47508 | 0.0003215 | 4.6324   | 1.54E-07   |
| A_52_P308843  | SKIDA1        | SKI/DACH domain containing 1                               | -2.47191 | 1.00E-07  | 1.63913  | 0.00058378 |
| A_51_P137991  | WNT5B         | wingless-type MMTV integration site family, member 5B      | -2.47161 | 8.85E-08  | -3.80211 | 2.90E-11   |
| A_52_P216436  | COL2A1        | collagen, type II, alpha 1                                 | -2.47065 | 0.001691  | 3.52159  | 4.37E-05   |
| A_51_P419226  | S100A14       | S100 calcium binding protein A14                           | -2.46713 | 0.00024   | 5.60785  | 9.50E-09   |
| A_51_P448632  | TMEM116       | transmembrane protein 116                                  | -2.46633 | 0.0003643 | -2.68684 | 0.00012872 |
| A_52_P363013  | Lrrc31        | leucine rich repeat containing 31                          | -2.46394 | 4.99E-07  | -1.59738 | 0.00221093 |
| A_51_P476538  | Inafm2        | InaF motif containing 2                                    | -2.46166 | 1.49E-10  | 2.26197  | 1.23E-09   |
| A_51_P291417  | THBD          | thrombomodulin                                             | -2.46014 | 6.77E-05  | -1.77647 | 0.00585331 |
| A_52_P187677  |               |                                                            | -2.45951 | 1.69E-11  | 5.21354  | 5.07E-18   |
| A_51_P487791  | ADRB2         | adrenoceptor beta 2, surface                               | -2.45857 | 5.43E-05  | 20.6818  | 1.27E-15   |
| A_51_P412468  | SLC4A11       | solute carrier family 4, sodium borate transporter, member | -2.45653 | 7.76E-07  | 4.6685   | 1.59E-11   |
| A_51_P279437  | MFS2A         | major facilitator superfamily domain containing 2A         | -2.45046 | 8.11E-10  | -2.98532 | 1.00E-11   |
| A_52_P277205  | ADAM23        | ADAM metallopeptidase domain 23                            | -2.44806 | 1.03E-06  | -5.45131 | 2.34E-12   |
| A_51_P381178  | ZBTB46        | zinc finger and BTB domain containing 46                   | -2.44795 | 4.63E-06  | -10.9881 | 5.14E-15   |
| A_52_P578359  | PLD1          | phospholipase D1, phosphatidylcholine-specific             | -2.43603 | 1.26E-06  | 1.55706  | 0.00492213 |
| A_52_P338349  | C230035116Rik | RIKEN cDNA C230035116 gene                                 | -2.43549 | 0.0011583 | -4.9434  | 4.88E-07   |
| A_52_P460957  | CREM          | cAMP responsive element modulator                          | -2.43541 | 4.23E-10  | -1.57465 | 5.27E-05   |

|               |               |                                                                |          |           |          |            |
|---------------|---------------|----------------------------------------------------------------|----------|-----------|----------|------------|
| A_52_P343402  | Slc5a4b       | solute carrier family 5 (neutral amino acid transporters, syst | -2.43429 | 1.35E-06  | -1.64536 | 0.00192815 |
| A_51_P293278  | Tcte2         | t-complex-associated testis expressed 2                        | -2.43326 | 0.0069849 | -3.36122 | 0.00045634 |
| A_52_P590661  | EEF2K         | eukaryotic elongation factor 2 kinase                          | -2.43238 | 5.81E-08  | -6.32699 | 4.86E-15   |
| A_51_P457187  | TNFRSF13C     | tumor necrosis factor receptor superfamily, member 13C         | -2.43046 | 1.88E-05  | 1.6044   | 0.0106445  |
| A_51_P180307  | GEMIN8        | gem (nuclear organelle) associated protein 8                   | -2.43029 | 1.81E-07  | -1.79529 | 0.00010042 |
| A_52_P559557  | BC026585      | cDNA sequence BC026585                                         | -2.4278  | 3.55E-08  | 2.46449  | 2.58E-08   |
| A_52_P225370  | 2610201A13Rik | RIKEN cDNA 2610201A13 gene                                     | -2.42673 | 4.15E-08  | -2.29818 | 1.34E-07   |
| A_52_P12840   | MAB21L3       | mab-21-like 3 (C. elegans)                                     | -2.42502 | 5.85E-10  | 4.03772  | 1.53E-14   |
| A_52_P512575  | HOPX          | HOP homeobox                                                   | -2.4238  | 5.66E-11  | -4.74994 | 6.08E-17   |
| A_52_P429364  | Ccdc69        | coiled-coil domain containing 69                               | -2.42263 | 0.0004086 | -6.35684 | 4.06E-09   |
| A_51_P511707  | NTPCR         | nucleoside-triphosphatase, cancer-related                      | -2.42021 | 3.11E-11  | -1.68892 | 9.67E-07   |
| A_51_P382214  | RAB17         | RAB17, member RAS oncogene family                              | -2.41911 | 0.0066665 | 3.22505  | 0.00057244 |
| A_52_P194382  | FANK1         | fibronectin type III and ankyrin repeat domains 1              | -2.4161  | 1.80E-06  | 1.69303  | 0.0012646  |
| A_51_P167803  | PDE1B         | phosphodiesterase 1B, calmodulin-dependent                     | -2.41454 | 1.17E-11  | 2.33998  | 2.67E-11   |
| A_51_P116946  | ATP6V0A4      | ATPase, H+ transporting, lysosomal V0 subunit a4               | -2.40841 | 0.0003459 | -3.55964 | 2.51E-06   |
| A_51_P325318  | SERINC2       | serine incorporator 2                                          | -2.40478 | 3.26E-07  | 2.42418  | 2.78E-07   |
| A_51_P352216  | ZNF365        | zinc finger protein 365                                        | -2.40426 | 0.0001716 | 17.2213  | 3.29E-14   |
| A_52_P81324   | B230311B06Rik | RIKEN cDNA B230311B06 gene                                     | -2.40322 | 4.57E-10  | -3.49405 | 1.31E-13   |
| A_51_P152550  | IQCG          | IQ motif containing G                                          | -2.40299 | 4.28E-12  | -2.14865 | 9.47E-11   |
| A_52_P527800  | EMILIN2       | elastin microfibril interfacier 2                              | -2.40245 | 4.70E-06  | 2.95223  | 1.37E-07   |
| A_52_P391098  | CREM          | cAMP responsive element modulator                              | -2.40129 | 1.75E-11  | -1.62186 | 2.05E-06   |
| A_51_P293538  | PPP1R1A       | protein phosphatase 1, regulatory (inhibitor) subunit 1A       | -2.39989 | 1.66E-10  | -1.75621 | 8.74E-07   |
| A_52_P286528  | NUDT11        | nudix (nucleoside diphosphate linked moiety X)-type motif 1    | -2.39931 | 0.0002056 | 2.12593  | 0.00099547 |
| A_51_P104162  | GFOD1         | glucose-fructose oxidoreductase domain containing 1            | -2.39866 | 1.06E-05  | -3.22698 | 8.43E-08   |
| A_52_P470150  | DDC           | dopa decarboxylase (aromatic L-amino acid decarboxylase)       | -2.39623 | 3.19E-12  | -1.90497 | 2.60E-09   |
| A_51_P318580  | MYH14         | myosin, heavy chain 14, non-muscle                             | -2.39335 | 1.23E-11  | -2.06141 | 7.68E-10   |
| A_52_P523459  | CD44          | CD44 molecule (Indian blood group)                             | -2.39289 | 0.0027631 | 6.67372  | 9.04E-08   |
| A_52_P74381   | A630012P03Rik | RIKEN cDNA A630012P03 gene                                     | -2.39013 | 4.17E-07  | -2.13642 | 4.00E-06   |
| A_51_P451574  | Acot1         | acyl-CoA thioesterase 1                                        | -2.38993 | 4.07E-15  | 1.75755  | 1.22E-10   |
| A_52_P613688  | ELMO1         | engulfment and cell motility 1                                 | -2.38958 | 4.45E-05  | -2.84079 | 3.27E-06   |
| A_51_P201982  | ANGPT2        | angiopoietin 2                                                 | -2.38938 | 3.86E-08  | 7.81486  | 1.06E-16   |
| A_52_P1093529 | PIK3R5        | phosphoinositide-3-kinase, regulatory subunit 5                | -2.38146 | 0.0004313 | -2.11523 | 0.0018177  |
| A_51_P372992  | C10orf54      | chromosome 10 open reading frame 54                            | -2.37751 | 1.14E-06  | 1.86821  | 0.00012211 |
| A_51_P516125  |               |                                                                | -2.37612 | 3.83E-07  | 2.87249  | 9.59E-09   |
| A_52_P621064  | NMT1          | N-myristoyltransferase 1                                       | -2.37452 | 1.20E-07  | 1.76822  | 7.53E-05   |
| A_51_P353162  | Svs5          | seminal vesicle secretory protein 5                            | -2.37278 | 0.0063632 | 3.51158  | 0.00019352 |
| A_52_P481316  | WDR93         | WD repeat domain 93                                            | -2.37051 | 0.0028396 | -5.06525 | 1.22E-06   |
| A_52_P541802  | Ifitm1        | interferon induced transmembrane protein 1                     | -2.36865 | 1.35E-08  | -1.67675 | 5.79E-05   |
| A_51_P175262  | PDGFB         | platelet-derived growth factor beta polypeptide                | -2.3615  | 0.0002521 | -2.27563 | 0.00040991 |
| A_52_P527917  | SLC16A10      | solute carrier family 16 (aromatic amino acid transporter), nr | -2.36103 | 0.0005652 | -6.51258 | 3.19E-09   |
| A_51_P356642  | KRT19         | keratin 19, type I                                             | -2.36027 | 1.67E-12  | 6.32074  | 5.50E-21   |
| A_51_P272283  | CMBL          | carboxymethylenebutenolidase homolog (Pseudomonas)             | -2.3587  | 1.75E-05  | -3.61437 | 1.98E-08   |
| A_52_P1098820 | 1700016G22Rik | RIKEN cDNA 1700016G22 gene                                     | -2.35626 | 0.0013769 | 2.20519  | 0.00279769 |
| A_52_P502754  | AMPD3         | adenosine monophosphate deaminase 3                            | -2.35385 | 1.99E-05  | 1.83538  | 0.00111251 |
| A_51_P516133  | HIST1H1C      | histone cluster 1, H1c                                         | -2.3533  | 6.98E-11  | 3.08972  | 1.11E-13   |
| A_52_P399175  | RFFL          | ring finger and FYVE-like domain containing E3 ubiquitin pro   | -2.34951 | 1.94E-08  | 1.5785   | 0.00028869 |
| A_51_P214269  | EPHA1         | EPH receptor A1                                                | -2.34773 | 1.85E-08  | -2.32736 | 2.26E-08   |
| A_52_P46085   | MVP           | major vault protein                                            | -2.34566 | 0.0002302 | 1.99651  | 0.00191442 |
| A_52_P1092227 |               |                                                                | -2.34412 | 1.99E-05  | -1.59745 | 0.00881909 |
| A_52_P383577  | SP6           | Sp6 transcription factor                                       | -2.34306 | 2.70E-12  | 6.49883  | 5.07E-21   |
| A_52_P221630  | AKT3          | v-akt murine thymoma viral oncogene homolog 3                  | -2.34062 | 1.89E-11  | -2.02804 | 1.07E-09   |
| A_52_P229536  | CD44          | CD44 molecule (Indian blood group)                             | -2.33998 | 0.0033064 | 24.4309  | 1.29E-12   |
| A_52_P298213  | RECQL         | RecQ helicase-like                                             | -2.33789 | 0.0082679 | -2.36248 | 0.00759361 |

|               |               |                                                              |          |           |          |            |
|---------------|---------------|--------------------------------------------------------------|----------|-----------|----------|------------|
| A_52_P85805   | WNT5B         | wingless-type MMTV integration site family, member 5B        | -2.33336 | 2.11E-06  | -2.06119 | 2.25E-05   |
| A_51_P175988  | HTR3A         | 5-hydroxytryptamine (serotonin) receptor 3A, ionotropic      | -2.32642 | 0.0035269 | -2.5785  | 0.00129869 |
| A_51_P172005  | Rpl39l        | ribosomal protein L39-like                                   | -2.32163 | 1.63E-10  | 4.33117  | 2.78E-16   |
| A_51_P111164  | RND1          | Rho family GTPase 1                                          | -2.31691 | 9.00E-09  | -2.51984 | 1.29E-09   |
| A_51_P485918  | HSPB11        | heat shock protein family B (small), member 11               | -2.31622 | 8.15E-05  | -2.40156 | 4.74E-05   |
| A_51_P450052  | SMARCA2       | SWI/SNF related, matrix associated, actin dependent regulat  | -2.31604 | 3.09E-05  | 4.58876  | 9.34E-10   |
| A_51_P312348  | KRT7          | keratin 7, type II                                           | -2.31582 | 0.0022961 | 49.644   | 2.44E-15   |
| A_51_P157100  |               |                                                              | -2.31578 | 0.002884  | -2.05955 | 0.00894924 |
| A_51_P466371  | PITPNA        | phosphatidylinositol transfer protein, alpha                 | -2.31375 | 5.79E-10  | -3.10638 | 6.36E-13   |
| A_52_P1069478 | Gm11744       | predicted gene 11744                                         | -2.31204 | 2.23E-08  | -3.17664 | 2.58E-11   |
| A_51_P286610  | RABGAP1L      | RAB GTPase activating protein 1-like                         | -2.30973 | 0.000482  | 2.81475  | 3.83E-05   |
| A_51_P438278  | MTUS2         | microtubule associated tumor suppressor candidate 2          | -2.30893 | 7.28E-13  | 1.65846  | 3.82E-08   |
| A_52_P924212  |               |                                                              | -2.30706 | 0.0027552 | 15.31    | 2.04E-11   |
| A_51_P277994  | OAS2          | 2'-5'-oligoadenylate synthetase 2, 69/71kDa                  | -2.30659 | 6.59E-11  | -2.58205 | 3.68E-12   |
| A_52_P649724  | SMYD3         | SET and MYND domain containing 3                             | -2.30657 | 0.0002301 | -2.50977 | 7.21E-05   |
| A_51_P137707  |               |                                                              | -2.30639 | 4.53E-07  | -2.34971 | 3.09E-07   |
| A_52_P656699  | Actn3         | actinin alpha 3                                              | -2.30491 | 6.02E-10  | -5.03747 | 8.51E-17   |
| A_51_P413785  | COMMD3        | COMM domain containing 3                                     | -2.29956 | 1.06E-08  | 5.4967   | 7.41E-16   |
| A_52_P58283   | KCNA5         | potassium channel, voltage gated shaker related subfamily 4  | -2.29917 | 0.0039631 | -2.03926 | 0.01198    |
| A_51_P120680  | Zfp640        | zinc finger protein 640                                      | -2.2939  | 3.26E-15  | -2.30218 | 2.92E-15   |
| A_52_P61691   | CD59          | CD59 molecule, complement regulatory protein                 | -2.29267 | 4.41E-05  | -2.95229 | 8.14E-07   |
| A_51_P154842  | Oas1f         | 2'-5'-oligoadenylate synthetase 1F                           | -2.29088 | 5.04E-13  | -1.99972 | 3.24E-11   |
| A_51_P485405  | GTSF1         | gametocyte specific factor 1                                 | -2.28806 | 1.94E-05  | 1.76266  | 0.00151953 |
| A_51_P394847  | Gm11346       | X-linked lymphocyte-regulated 5 pseudogene                   | -2.28782 | 0.0043368 | -2.02582 | 0.0131566  |
| A_52_P214506  | SPATA45       | spermatogenesis associated 45                                | -2.28744 | 0.0012533 | -3.03939 | 4.53E-05   |
| A_51_P154637  | Nlrp4f        | NLR family, pyrin domain containing 4F                       | -2.28517 | 0.0001177 | 1.65741  | 0.0107465  |
| A_52_P672761  | TEC           | tec protein tyrosine kinase                                  | -2.27958 | 6.72E-05  | 3.8809   | 2.20E-08   |
| A_51_P101347  | PLS1          | plastin 1                                                    | -2.2795  | 2.08E-07  | -1.82891 | 2.80E-05   |
| A_51_P126702  | DDIT4L        | DNA-damage-inducible transcript 4-like                       | -2.27893 | 3.49E-09  | 8.33202  | 4.52E-19   |
| A_51_P333253  | MYO1G         | myosin IG                                                    | -2.27763 | 8.13E-08  | -2.73929 | 1.52E-09   |
| A_51_P404755  | ARMCX3        | armadillo repeat containing, X-linked 3                      | -2.27351 | 8.45E-05  | -3.06511 | 9.05E-07   |
| A_52_P66425   | Tcstv1        | 2-cell-stage, variable group, member 1                       | -2.26956 | 3.38E-05  | 7.93483  | 6.18E-13   |
| A_52_P593037  | ACSL5         | acyl-CoA synthetase long-chain family member 5               | -2.2683  | 1.45E-09  | -2.31973 | 8.25E-10   |
| A_51_P111655  | Snhg11        | small nucleolar RNA host gene 11                             | -2.26601 | 0.0057385 | -3.48342 | 9.13E-05   |
| A_51_P454422  | UNC79         | unc-79 homolog (C. elegans)                                  | -2.26278 | 0.0006515 | 6.86443  | 8.34E-10   |
| A_51_P144052  | AIM1          | absent in melanoma 1                                         | -2.26106 | 1.57E-06  | 9.15314  | 6.51E-16   |
| A_51_P449867  | NYX           | nyctalopin                                                   | -2.25728 | 0.0033869 | 2.38046  | 0.00198477 |
| A_51_P357533  | TMEM44        | transmembrane protein 44                                     | -2.25722 | 1.33E-05  | -2.23091 | 1.63E-05   |
| A_52_P474961  | FSIP1         | fibrous sheath interacting protein 1                         | -2.25604 | 0.0006167 | -2.26899 | 0.00057366 |
| A_52_P1662    | ZRSR2         | zinc finger (CCCH type), RNA-binding motif and serine/argini | -2.25528 | 1.98E-09  | -1.88183 | 2.50E-07   |
| A_51_P378589  | MYOF          | myoferlin                                                    | -2.25428 | 2.60E-11  | -1.66455 | 3.27E-07   |
| A_52_P434306  |               |                                                              | -2.25333 | 2.67E-09  | 5.79137  | 3.11E-17   |
| A_51_P128356  | 5730433N10Rik | RIKEN cDNA 5730433N10 gene                                   | -2.25054 | 0.0004475 | 3.36457  | 2.11E-06   |
| A_51_P410715  | HS3ST3B1      | heparan sulfate (glucosamine) 3-O-sulfotransferase 3B1       | -2.2499  | 0.0008969 | 2.29911  | 0.00068982 |
| A_51_P128491  | TCN2          | transcobalamin II                                            | -2.24607 | 2.51E-10  | 1.91903  | 2.13E-08   |
| A_51_P423880  | SMARCD3       | SWI/SNF related, matrix associated, actin dependent regulat  | -2.24482 | 7.48E-14  | -2.50192 | 3.30E-15   |
| A_52_P674196  | BBS9          | Bardet-Biedl syndrome 9                                      | -2.24415 | 1.68E-07  | -2.52787 | 1.27E-08   |
| A_52_P660422  | MIP           | major intrinsic protein of lens fiber                        | -2.24252 | 8.35E-06  | -4.82567 | 2.61E-11   |
| A_52_P195018  | ARAP3         | ArfGAP with RhoGAP domain, ankyrin repeat and PH domair      | -2.23922 | 3.70E-08  | -5.43715 | 1.97E-15   |
| A_51_P116940  | EPHX2         | epoxide hydrolase 2, cytoplasmic                             | -2.23824 | 4.32E-09  | -1.89059 | 3.64E-07   |
| A_52_P211185  | GNAT1         | guanine nucleotide binding protein (G protein), alpha transd | -2.23276 | 0.0046399 | -2.57794 | 0.00112956 |
| A_52_P337357  | OAS1          | 2'-5'-oligoadenylate synthetase 1, 40/46kDa                  | -2.2322  | 1.06E-11  | -1.84378 | 3.86E-09   |
| A_51_P412846  | EFHD1         | EF-hand domain family, member D1                             | -2.23108 | 9.17E-12  | -3.65098 | 7.16E-17   |

|              |               |                                                               |          |           |          |            |
|--------------|---------------|---------------------------------------------------------------|----------|-----------|----------|------------|
| A_52_P85152  | ACAD11        | acyl-CoA dehydrogenase family, member 11                      | -2.22571 | 7.59E-07  | 3.12466  | 9.07E-10   |
| A_52_P93284  | MYCL          | v-myc avian myelocytomatosis viral oncogene lung carcinom     | -2.2237  | 1.41E-07  | -2.86629 | 6.12E-10   |
| A_52_P957260 |               |                                                               | -2.22312 | 0.0001613 | -3.08361 | 1.26E-06   |
| A_52_P384100 | BDNF          | brain-derived neurotrophic factor                             | -2.22148 | 9.05E-05  | 4.50399  | 2.34E-09   |
| A_51_P388325 | CLGN          | calmegin                                                      | -2.22046 | 2.37E-11  | -2.71016 | 1.25E-13   |
| A_51_P437050 | HEG1          | heart development protein with EGF-like domains 1             | -2.2199  | 0.0011297 | -2.55633 | 0.00020328 |
| A_51_P415369 | ZBTB32        | zinc finger and BTB domain containing 32                      | -2.2175  | 1.73E-10  | -2.35121 | 3.59E-11   |
| A_51_P186798 | Gm2881        | predicted gene 2881                                           | -2.21265 | 8.69E-08  | 1.65496  | 9.76E-05   |
| A_51_P503736 | TEX19         | testis expressed 19                                           | -2.21231 | 1.57E-13  | 11.6968  | 1.70E-26   |
| A_51_P466180 | GM2A          | GM2 ganglioside activator                                     | -2.21142 | 5.35E-06  | -2.82356 | 5.59E-08   |
| A_51_P160754 | APOBEC1       | apolipoprotein B mRNA editing enzyme, catalytic polypeptid    | -2.21038 | 1.99E-08  | 2.90194  | 4.10E-11   |
| A_51_P381618 | PLA1A         | phospholipase A1 member A                                     | -2.2084  | 1.14E-08  | -1.89365 | 6.02E-07   |
| A_51_P126626 | ZNF503        | zinc finger protein 503                                       | -2.20808 | 0.0024748 | 2.77197  | 0.00019747 |
| A_51_P277431 | CCDC3         | coiled-coil domain containing 3                               | -2.20651 | 1.82E-07  | -6.61169 | 6.88E-16   |
| A_51_P398647 | ZNF446        | zinc finger protein 446                                       | -2.20613 | 1.90E-10  | -2.12839 | 5.17E-10   |
| A_52_P544043 | PCSK5         | proprotein convertase subtilisin/kexin type 5                 | -2.20611 | 0.0035361 | 1.93326  | 0.0129768  |
| A_52_P379277 | ENPP3         | ectonucleotide pyrophosphatase/phosphodiesterase 3            | -2.20462 | 3.21E-09  | -12.8699 | 9.14E-22   |
| A_52_P13109  | ALDH2         | aldehyde dehydrogenase 2 family (mitochondrial)               | -2.20346 | 0.002935  | -2.80044 | 0.00021575 |
| A_51_P148509 | TTN           | titin                                                         | -2.20299 | 0.0032649 | 4.54202  | 1.18E-06   |
| A_51_P410260 | PIP5K1B       | phosphatidylinositol-4-phosphate 5-kinase, type I, beta       | -2.20297 | 3.22E-08  | -2.07048 | 1.47E-07   |
| A_51_P316311 | Ppfia4        | protein tyrosine phosphatase, receptor type, f polypeptide (  | -2.20283 | 2.09E-08  | 1.61377  | 6.72E-05   |
| A_51_P400269 | SLC38A5       | solute carrier family 38, member 5                            | -2.20183 | 1.29E-08  | -7.52209 | 3.02E-18   |
| A_51_P116755 | CAP2          | CAP, adenylate cyclase-associated protein, 2 (yeast)          | -2.1998  | 0.0034414 | -2.37016 | 0.00158391 |
| A_51_P492047 | FAM3B         | family with sequence similarity 3, member B                   | -2.19761 | 0.0061721 | 6.28797  | 1.62E-07   |
| A_52_P612803 | CCNG1         | cyclin G1                                                     | -2.19685 | 1.81E-07  | 4.48011  | 1.85E-13   |
| A_51_P206965 | SYPL2         | synaptophysin-like 2                                          | -2.18765 | 0.0025676 | -2.38701 | 0.0009846  |
| A_52_P366251 | DOCK5         | dedicator of cytokinesis 5                                    | -2.18492 | 0.006746  | -2.61444 | 0.0012224  |
| A_52_P450918 | RAB3IL1       | RAB3A interacting protein (rabin3)-like 1                     | -2.18234 | 0.0030359 | 2.08861  | 0.0048073  |
| A_52_P584154 | MANBA         | mannosidase, beta A, lysosomal                                | -2.18217 | 1.45E-08  | -2.02431 | 9.85E-08   |
| A_51_P258671 | RSU1          | Ras suppressor protein 1                                      | -2.18041 | 7.40E-05  | -1.58271 | 0.0107382  |
| A_51_P376445 | Rhox5         | reproductive homeobox 5                                       | -2.17865 | 2.00E-11  | 2.15104  | 2.91E-11   |
| A_51_P214083 | 2310039H08Rik | RIKEN cDNA 2310039H08 gene                                    | -2.17729 | 3.08E-06  | 2.8204   | 1.98E-08   |
| A_51_P416074 | RYR1          | ryanodine receptor 1 (skeletal)                               | -2.17683 | 2.48E-07  | -1.52698 | 0.00099812 |
| A_51_P200667 | CLMN          | calmin (calponin-like, transmembrane)                         | -2.17665 | 1.33E-05  | -7.09507 | 1.33E-13   |
| A_51_P218774 | RGS10         | regulator of G-protein signaling 10                           | -2.17574 | 0.0014033 | 1.89348  | 0.00699102 |
| A_51_P450750 | PLA2G4B       | phospholipase A2, group IVB (cytosolic)                       | -2.17335 | 2.31E-08  | 2.56641  | 4.43E-10   |
| A_51_P392577 | CCBL2         | cysteine conjugate-beta lyase 2                               | -2.17302 | 1.16E-11  | -1.91543 | 5.88E-10   |
| A_51_P234728 | LPAR6         | lysophosphatidic acid receptor 6                              | -2.17279 | 2.05E-06  | 1.70047  | 0.0003431  |
| A_52_P361611 | ZNF652        | zinc finger protein 652                                       | -2.17242 | 1.48E-06  | 2.15518  | 1.75E-06   |
| A_52_P158476 | PROK2         | prokineticin 2                                                | -2.1689  | 0.0011902 | 2.01629  | 0.0028676  |
| A_52_P541752 | DDIT4L        | DNA-damage-inducible transcript 4-like                        | -2.16578 | 8.27E-10  | 9.10778  | 4.29E-21   |
| A_51_P356512 | ARMCX2        | armadillo repeat containing, X-linked 2                       | -2.1655  | 2.39E-10  | -1.9929  | 2.64E-09   |
| A_52_P141141 | FGGY          | FGGY carbohydrate kinase domain containing                    | -2.16512 | 0.0002092 | 1.61235  | 0.0136013  |
| A_52_P465971 | DMRT3         | doublesex and mab-3 related transcription factor 3            | -2.16276 | 4.39E-06  | 2.02676  | 1.61E-05   |
| A_52_P50063  | TRIM5         | tripartite motif containing 5                                 | -2.15941 | 0.0026709 | -3.96437 | 2.42E-06   |
| A_52_P235319 | PTPRE         | protein tyrosine phosphatase, receptor type, E                | -2.15567 | 0.0092993 | 12.9663  | 4.46E-10   |
| A_51_P438083 | SLC6A13       | solute carrier family 6 (neurotransmitter transporter), meml  | -2.15456 | 0.0026746 | 11.2338  | 4.17E-11   |
| A_52_P523399 | C14orf39      | chromosome 14 open reading frame 39                           | -2.15434 | 0.0003937 | -2.19654 | 0.0002995  |
| A_51_P442359 |               |                                                               | -2.15329 | 0.0017787 | -2.05134 | 0.00311498 |
| A_51_P386899 | FLVCR2        | feline leukemia virus subgroup C cellular receptor family, me | -2.15272 | 2.15E-05  | 6.57914  | 5.50E-13   |
| A_52_P572537 | MREG          | melanoregulin                                                 | -2.1488  | 0.000139  | 1.78553  | 0.00237196 |
| A_52_P132028 | TAF3          | TAF3 RNA polymerase II, TATA box binding protein (TBP)-ass    | -2.1437  | 9.48E-08  | 2.27999  | 2.19E-08   |
| A_52_P244702 | Tcf7          | transcription factor 7, T cell specific                       | -2.14168 | 2.02E-07  | -1.69075 | 6.12E-05   |

|               |                     |                                                                    |          |           |          |            |
|---------------|---------------------|--------------------------------------------------------------------|----------|-----------|----------|------------|
| A_51_P327920  | ST7L                | suppression of tumorigenicity 7 like                               | -2.13965 | 9.07E-08  | 3.53994  | 1.94E-12   |
| A_52_P62617   | Gm9895              | predicted gene 9895                                                | -2.1369  | 7.87E-09  | -4.71648 | 5.31E-16   |
| A_52_P28775   | ENGASE              | endo-beta-N-acetylglucosaminidase                                  | -2.13624 | 2.77E-07  | 2.55289  | 5.13E-09   |
| A_51_P369971  | FRA10AC1            | fragile site, folic acid type, rare, fra(10)(q23.3) or fra(10)(q24 | -2.13357 | 2.30E-11  | -1.55837 | 9.58E-07   |
| A_52_P382854  | RHBDP2              | rhomboid 5 homolog 2 (Drosophila)                                  | -2.13037 | 7.97E-05  | 1.77744  | 0.00154154 |
| A_51_P244303  | SMC1B               | structural maintenance of chromosomes 1B                           | -2.13006 | 5.68E-05  | 1.53244  | 0.012352   |
| A_51_P206203  | MRGPRF              | MAS-related GPR, member F                                          | -2.1264  | 2.74E-06  | -1.68763 | 0.00035926 |
| A_52_P284889  | PRKCZ               | protein kinase C, zeta                                             | -2.12625 | 2.12E-13  | -2.57206 | 7.94E-16   |
| A_51_P345649  | PDGFRA              | platelet-derived growth factor receptor, alpha polypeptide         | -2.12589 | 2.48E-05  | 3.56627  | 3.07E-09   |
| A_52_P601148  | LPAR6               | lysophosphatidic acid receptor 6                                   | -2.12557 | 8.00E-12  | 2.49838  | 7.94E-14   |
| A_51_P165244  | GBP4                | guanylate binding protein 4                                        | -2.12516 | 0.0004992 | 14.601   | 3.63E-14   |
| A_51_P119776  | SYNPO2              | synaptopodin 2                                                     | -2.12098 | 4.11E-05  | 1.58801  | 0.005798   |
| A_52_P265358  | IGSF1               | immunoglobulin superfamily, member 1                               | -2.11875 | 0.0064269 | -6.26875 | 7.75E-08   |
| A_52_P299713  | TCFL5               | transcription factor-like 5 (basic helix-loop-helix)               | -2.1185  | 1.81E-08  | -2.72676 | 4.13E-11   |
| A_52_P422172  | DAPP1               | dual adaptor of phosphotyrosine and 3-phosphoinositides            | -2.11691 | 1.56E-08  | -1.83487 | 7.35E-07   |
| A_52_P121502  | PLLP                | plasmolipin                                                        | -2.11689 | 6.91E-07  | 1.64576  | 0.0002274  |
| A_51_P292008  | GPX3                | glutathione peroxidase 3                                           | -2.11416 | 3.12E-07  | 12.8035  | 1.43E-19   |
| A_52_P22474   | FUT9                | fucosyltransferase 9 (alpha (1,3) fucosyltransferase)              | -2.11303 | 0.0062304 | -2.99818 | 0.00016721 |
| A_52_P306089  | 1700061G19Rik       | RIKEN cDNA 1700061G19 gene                                         | -2.112   | 0.0007706 | 2.83603  | 1.36E-05   |
| A_52_P1196751 | SLC25A12            | solute carrier family 25 (aspartate/glutamate carrier), memt       | -2.10934 | 0.0089457 | -2.81882 | 0.00054754 |
| A_52_P151905  | H2afb1 (includes ot | H2A histone family, member B1                                      | -2.10544 | 0.0017286 | 1.97867  | 0.00362202 |
| A_51_P373901  | RSPH1               | radial spoke head 1 homolog (Chlamydomonas)                        | -2.10379 | 6.18E-07  | -2.67695 | 3.19E-09   |
| A_51_P427926  | SMAD6               | SMAD family member 6                                               | -2.10006 | 1.41E-09  | -2.2577  | 1.94E-10   |
| A_51_P174696  | CASQ2               | calsequestrin 2 (cardiac muscle)                                   | -2.10001 | 2.84E-05  | -2.07853 | 3.44E-05   |
| A_51_P161429  | SNX11               | sorting nexin 11                                                   | -2.09998 | 2.77E-05  | 1.75431  | 0.00073935 |
| A_52_P499128  | SYNJ2               | synaptojanin 2                                                     | -2.09875 | 0.0004986 | 1.69778  | 0.00892852 |
| A_51_P159503  | RNF213              | ring finger protein 213                                            | -2.09783 | 1.49E-06  | -2.06675 | 2.07E-06   |
| A_51_P499599  | OSR2                | odd-skipped related transciption factor 2                          | -2.09741 | 2.40E-05  | -3.32136 | 6.48E-09   |
| A_51_P234359  | Sct                 | secretin                                                           | -2.09737 | 0.0042665 | 18.0373  | 1.12E-12   |
| A_52_P584236  | AP3S2               | adaptor-related protein complex 3, sigma 2 subunit                 | -2.09687 | 0.0003089 | -2.35273 | 5.43E-05   |
| A_51_P126327  | OTUD7A              | OTU deubiquitinase 7A                                              | -2.0965  | 4.09E-07  | 16.8428  | 1.05E-20   |
| A_52_P154800  | PLA2G16             | phospholipase A2, group XVI                                        | -2.09355 | 3.88E-06  | 1.60195  | 0.00106764 |
| A_52_P432715  | Gm14410             | predicted gene 14410                                               | -2.09232 | 1.42E-06  | -2.11049 | 1.17E-06   |
| A_51_P193536  | CCS                 | copper chaperone for superoxide dismutase                          | -2.09106 | 1.24E-05  | -1.52651 | 0.00514405 |
| A_51_P234330  | RTKN                | rhotekin                                                           | -2.09096 | 3.88E-12  | 5.67977  | 1.20E-21   |
| A_51_P143915  | RNF181              | ring finger protein 181                                            | -2.08889 | 1.68E-12  | 1.68043  | 3.78E-09   |
| A_51_P229134  | CNGA3               | cyclic nucleotide gated channel alpha 3                            | -2.08714 | 0.0018146 | 14.6113  | 5.05E-13   |
| A_51_P363763  | MCM3AP              | minichromosome maintenance complex component 3 assoc               | -2.08639 | 5.17E-07  | 2.43551  | 1.56E-08   |
| A_52_P505930  | SP6                 | Sp6 transcription factor                                           | -2.08542 | 0.0010413 | 3.58269  | 7.13E-07   |
| A_52_P326399  | FKBP11              | FK506 binding protein 11, 19 kDa                                   | -2.08406 | 4.67E-07  | -4.55537 | 9.70E-14   |
| A_51_P489503  | NOTUM               | notum pectinacetylerase homolog (Drosophila)                       | -2.08204 | 2.13E-06  | -6.45398 | 5.42E-15   |
| A_52_P732433  |                     |                                                                    | -2.08165 | 0.0088435 | -2.57307 | 0.00112852 |
| A_52_P30497   | DNMT3A              | DNA (cytosine-5-)-methyltransferase 3 alpha                        | -2.08053 | 2.06E-08  | -2.05532 | 2.84E-08   |
| A_51_P263473  | SEPT3               | septin 3                                                           | -2.0767  | 5.54E-05  | -1.64997 | 0.0029776  |
| A_51_P458008  | WSCD1               | WSC domain containing 1                                            | -2.07316 | 2.12E-07  | 4.67805  | 1.75E-14   |
| A_52_P86704   | ARL4A               | ADP-ribosylation factor-like 4A                                    | -2.07224 | 0.0001151 | 4.45412  | 6.11E-10   |
| A_51_P399071  | Anp32a              | acidic (leucine-rich) nuclear phosphoprotein 32 family, mem        | -2.07082 | 1.01E-05  | -4.59169 | 6.85E-12   |
| A_51_P198453  | Obox6               | oocyte specific homeobox 6                                         | -2.06912 | 0.0021594 | 2.02252  | 0.0028319  |
| A_52_P603540  | Gm3383 (includes c  | predicted gene 3383                                                | -2.06639 | 9.64E-07  | 1.63427  | 0.00023082 |
| A_51_P315315  | ABCB5               | ATP-binding cassette, sub-family B (MDR/TAP), member 5             | -2.06474 | 0.0011194 | -2.48662 | 9.17E-05   |
| A_52_P592749  | TAF9B               | TAF9B RNA polymerase II, TATA box binding protein (TBP)-a:         | -2.06046 | 0.004206  | 2.0788   | 0.00382108 |
| A_52_P656634  | RPN1                | ribophorin I                                                       | -2.05987 | 0.0066614 | -2.05743 | 0.00674069 |
| A_52_P534361  | DUOXA1              | dual oxidase maturation factor 1                                   | -2.05709 | 3.42E-06  | 2.06426  | 3.17E-06   |

|              |                   |                                                                        |          |           |          |            |
|--------------|-------------------|------------------------------------------------------------------------|----------|-----------|----------|------------|
| A_51_P113144 | AP1S2             | adaptor-related protein complex 1, sigma 2 subunit                     | -2.05689 | 7.87E-09  | -3.22538 | 1.61E-13   |
| A_51_P275016 | SLC7A3            | solute carrier family 7 (cationic amino acid transporter, y+ s)        | -2.05518 | 0.0035137 | -2.55915 | 0.00027469 |
| A_51_P129694 | LRTM2             | leucine-rich repeats and transmembrane domains 2                       | -2.05501 | 0.0012107 | -5.12    | 6.89E-09   |
| A_51_P306731 | GPAT3             | glycerol-3-phosphate acyltransferase 3                                 | -2.05202 | 8.82E-07  | 2.01597  | 1.33E-06   |
| A_52_P119060 | ACPP              | acid phosphatase, prostate                                             | -2.05202 | 0.0081261 | 3.1924   | 8.25E-05   |
| A_52_P625321 | CABP4             | calcium binding protein 4                                              | -2.04845 | 6.22E-08  | -2.68836 | 8.64E-11   |
| A_51_P433584 | BCAS3             | breast carcinoma amplified sequence 3                                  | -2.04757 | 1.52E-08  | -1.52053 | 8.58E-05   |
| A_51_P434041 | NKAIN4            | Na <sup>+</sup> /K <sup>+</sup> transporting ATPase interacting 4      | -2.04379 | 8.59E-06  | -6.19344 | 4.71E-14   |
| A_51_P175424 | CA14              | carbonic anhydrase XIV                                                 | -2.04139 | 1.65E-05  | -6.63561 | 5.51E-14   |
| A_52_P303904 | CARD6             | caspase recruitment domain family, member 6                            | -2.04114 | 4.30E-07  | 1.87425  | 3.49E-06   |
| A_51_P435317 | AP1S2             | adaptor-related protein complex 1, sigma 2 subunit                     | -2.03995 | 7.04E-11  | -1.81592 | 3.15E-09   |
| A_52_P292632 | Wdr20rt           | WD repeat domain 20, retrogene                                         | -2.03937 | 4.87E-08  | 2.93133  | 8.41E-12   |
| A_52_P284441 | CEP112            | centrosomal protein 112kDa                                             | -2.0379  | 1.46E-09  | -2.86077 | 2.18E-13   |
| A_51_P517430 | CD1D              | CD1d molecule                                                          | -2.03722 | 1.11E-07  | -2.01899 | 1.40E-07   |
| A_51_P225564 | B3GNT4            | UDP-GlcNAc:betaGal beta-1,3-N-acetylglucosaminyltransferase 4          | -2.03679 | 0.0024316 | 4.28279  | 2.11E-07   |
| A_51_P465512 | NMT2              | N-myristoyltransferase 2                                               | -2.03673 | 0.0058158 | -3.26327 | 3.05E-05   |
| A_51_P121652 | ASPSCR1           | alveolar soft part sarcoma chromosome region, candidate 1              | -2.03548 | 1.77E-06  | -1.50132 | 0.00185241 |
| A_51_P195506 | CSF1              | colony stimulating factor 1 (macrophage)                               | -2.03545 | 0.0016236 | 6.81331  | 3.55E-10   |
| A_51_P183197 | CYSRT1            | cysteine-rich tail protein 1                                           | -2.03492 | 5.17E-06  | -1.64698 | 0.00048832 |
| A_51_P488910 | SYNE3             | spectrin repeat containing, nuclear envelope family member 3           | -2.03448 | 0.0044607 | 2.68329  | 0.00018812 |
| A_51_P421958 | SGMS1             | sphingomyelin synthase 1                                               | -2.0285  | 3.95E-07  | -1.62087 | 0.00011173 |
| A_51_P414126 | RAB19             | RAB19, member RAS oncogene family                                      | -2.02832 | 4.19E-07  | -1.63248 | 9.71E-05   |
| A_51_P279100 | PTGS1             | prostaglandin-endoperoxide synthase 1 (prostaglandin G/H/H synthase 1) | -2.02782 | 0.0058248 | -5.23807 | 1.33E-07   |
| A_52_P516296 | OAS3              | 2'-5'-oligoadenylate synthetase 3, 100kDa                              | -2.0261  | 2.89E-06  | -2.08484 | 1.53E-06   |
| A_52_P258557 | SLC26A9           | solute carrier family 26 (anion exchanger), member 9                   | -2.0259  | 0.0021034 | 13.1233  | 7.45E-13   |
| A_52_P418952 | KRT79             | keratin 79, type II                                                    | -2.02415 | 2.72E-05  | 1.62548  | 0.00179756 |
| A_51_P236412 | CDKL2             | cyclin-dependent kinase-like 2 (CDC2-related kinase)                   | -2.02295 | 1.44E-08  | -2.33574 | 3.14E-10   |
| A_51_P230269 | HLA-A             | major histocompatibility complex, class I, A                           | -2.02292 | 1.61E-07  | -6.19253 | 7.23E-17   |
| A_51_P316103 | LIMA1             | LIM domain and actin binding 1                                         | -2.0224  | 2.05E-08  | -2.30191 | 6.68E-10   |
| A_51_P135012 | RHPN2             | rhophilin, Rho GTPase binding protein 2                                | -2.01892 | 2.13E-08  | -1.66904 | 5.10E-06   |
| A_52_P932234 |                   |                                                                        | -2.01671 | 6.52E-05  | -2.45603 | 1.81E-06   |
| A_51_P151070 | KLF9              | Kruppel-like factor 9                                                  | -2.01563 | 8.05E-08  | 1.71804  | 6.22E-06   |
| A_52_P425651 | CFAP43            | cilia and flagella associated protein 43                               | -2.01414 | 1.06E-06  | 1.89595  | 4.49E-06   |
| A_52_P599264 | MDFIC             | MyoD family inhibitor domain containing                                | -2.01353 | 0.0002512 | 1.89617  | 0.00065891 |
| A_52_P127069 | C8orf44-SGK3/SGK3 | serum/glucocorticoid regulated kinase family, member 3                 | -2.00911 | 1.08E-06  | -1.56941 | 0.00041588 |
| A_52_P669128 | SLC5A1            | solute carrier family 5 (sodium/glucose cotransporter), member 1       | -2.00801 | 0.0074059 | 3.85014  | 5.64E-06   |
| A_51_P234763 | NLRP4             | NLR family, pyrin domain containing 4                                  | -2.00292 | 0.0042646 | 3.71962  | 2.51E-06   |
| A_51_P181691 | NOD2              | nucleotide-binding oligomerization domain containing 2                 | -2.0026  | 1.31E-05  | 2.17531  | 2.38E-06   |
| A_52_P439420 | WSCD1             | WSC domain containing 1                                                | -2.00242 | 8.27E-05  | 3.03881  | 5.11E-08   |
| A_52_P598420 | MATN1             | matrilin 1, cartilage matrix protein                                   | -2.00202 | 0.0083483 | 17.4524  | 2.75E-12   |
| A_52_P628521 | B130052P14Rik     | RIKEN cDNA B130052P14 gene                                             | -2.00123 | 0.0019379 | 6.38373  | 6.75E-10   |
| A_52_P746802 | MARS2             | methionyl-tRNA synthetase 2, mitochondrial                             | -2.00049 | 0.0001173 | 2.57419  | 1.41E-06   |
| A_52_P586851 | EF5               | embryonal Fyn-associated substrate                                     | -1.99845 | 1.07E-08  | 7.59902  | 6.40E-20   |
| A_52_P603654 | STX8              | syntaxin 8                                                             | -1.99716 | 5.72E-13  | -2.63602 | 1.29E-16   |
| A_52_P327146 |                   |                                                                        | -1.99412 | 8.95E-07  | -1.86097 | 4.85E-06   |
| A_51_P436727 | ARRB1             | arrestin, beta 1                                                       | -1.99103 | 8.35E-07  | -2.87255 | 2.14E-10   |
| A_51_P164998 | STMN2             | stathmin 2                                                             | -1.98968 | 1.36E-10  | -1.70244 | 2.71E-08   |
| A_52_P493112 | PSRC1             | proline/serine-rich coiled-coil 1                                      | -1.97881 | 7.01E-07  | 2.45235  | 4.31E-09   |
| A_52_P467718 | AP3M2             | adaptor-related protein complex 3, mu 2 subunit                        | -1.9786  | 9.91E-07  | -2.81741 | 3.27E-10   |
| A_51_P209183 | CXCL14            | chemokine (C-X-C motif) ligand 14                                      | -1.97637 | 0.000173  | 1.73235  | 0.00161128 |
| A_51_P130079 | LRMP              | lymphoid-restricted membrane protein                                   | -1.97589 | 2.08E-12  | -2.06924 | 4.39E-13   |
| A_51_P412914 | EF5               | embryonal Fyn-associated substrate                                     | -1.97396 | 4.82E-09  | 5.95804  | 4.12E-19   |
| A_52_P311853 | DDIT4L            | DNA-damage-inducible transcript 4-like                                 | -1.97372 | 4.71E-07  | 14.0695  | 7.79E-21   |

|              |                    |                                                               |          |           |          |            |
|--------------|--------------------|---------------------------------------------------------------|----------|-----------|----------|------------|
| A_52_P42269  | FGF10              | fibroblast growth factor 10                                   | -1.97336 | 0.0004173 | -3.6788  | 2.35E-08   |
| A_52_P29583  | HIPK2              | homeodomain interacting protein kinase 2                      | -1.97299 | 1.16E-09  | 1.78186  | 3.01E-08   |
| A_52_P570330 | KCNH3              | potassium channel, voltage gated eag related subfamily H, n   | -1.97195 | 0.0015907 | -2.30397 | 0.00018821 |
| A_51_P452876 | AK1                | adenylate kinase 1                                            | -1.97064 | 7.23E-12  | 3.35776  | 3.93E-18   |
| A_52_P657360 | TNNI1              | troponin I type 1 (skeletal, slow)                            | -1.97016 | 2.46E-05  | -1.74464 | 0.00028872 |
| A_51_P134262 | 1700052K11Rik      | RIKEN cDNA 1700052K11 gene                                    | -1.96743 | 2.43E-07  | 5.00842  | 1.11E-15   |
| A_51_P440047 | LGALS1             | lectin, galactoside-binding-like                              | -1.96714 | 1.29E-07  | 1.59126  | 4.69E-05   |
| A_52_P374825 | DUSP16             | dual specificity phosphatase 16                               | -1.966   | 0.0014124 | -3.15448 | 1.74E-06   |
| A_52_P633300 | MORC1              | MORC family CW-type zinc finger 1                             | -1.96437 | 6.99E-12  | -2.24996 | 9.00E-14   |
| A_51_P177904 | IL17A              | interleukin 17A                                               | -1.96405 | 0.0006399 | -1.74346 | 0.00372596 |
| A_51_P432511 | LACE1              | lactation elevated 1                                          | -1.96306 | 7.14E-07  | 1.83054  | 4.19E-06   |
| A_51_P358344 | Col17a1            | collagen, type XVII, alpha 1                                  | -1.95955 | 1.32E-05  | 1.5139   | 0.00300283 |
| A_52_P458177 | Mettl7a2/Mettl7a3  | methyltransferase like 7A3                                    | -1.95767 | 0.0002164 | 7.25549  | 5.37E-13   |
| A_51_P195244 | MFAP4              | microfibrillar-associated protein 4                           | -1.95582 | 8.07E-07  | 9.7079   | 7.12E-19   |
| A_52_P105736 | PAPOLG             | poly(A) polymerase gamma                                      | -1.95413 | 1.02E-05  | -2.82561 | 4.71E-09   |
| A_51_P209697 | ATCAY              | ataxia, cerebellar, Cayman type                               | -1.95384 | 2.08E-09  | -1.50265 | 1.34E-05   |
| A_51_P421780 | MYO18B             | myosin XVIIIIB                                                | -1.95289 | 8.97E-06  | -1.60163 | 0.00069838 |
| A_52_P820923 | 1700001L05Rik      | RIKEN cDNA 1700001L05 gene                                    | -1.9517  | 1.03E-08  | -2.45837 | 1.84E-11   |
| A_51_P378277 | HOXC13             | homeobox C13                                                  | -1.95131 | 0.000569  | 6.56581  | 1.27E-11   |
| A_52_P572045 | PFKP               | phosphofructokinase, platelet                                 | -1.94824 | 0.0039641 | -2.39177 | 0.00031661 |
| A_51_P175580 | TP53INP1           | tumor protein p53 inducible nuclear protein 1                 | -1.94823 | 1.28E-08  | 5.75108  | 1.53E-18   |
| A_52_P357177 | MTUS1              | microtubule associated tumor suppressor 1                     | -1.94769 | 2.04E-11  | -1.51652 | 2.88E-07   |
| A_52_P372400 | Platr25            | pluripotency associated transcript 25                         | -1.94682 | 0.0001403 | -1.62378 | 0.0033539  |
| A_52_P587738 | P2RY2              | purinergic receptor P2Y, G-protein coupled, 2                 | -1.94618 | 3.98E-05  | 2.87627  | 2.06E-08   |
| A_51_P362423 | MTL5               | metallothionein-like 5, testis-specific (tesmin)              | -1.94533 | 0.0006423 | -5.23774 | 2.58E-10   |
| A_51_P493709 |                    |                                                               | -1.94483 | 5.64E-07  | 2.03721  | 1.73E-07   |
| A_52_P663600 | PAK1               | p21 protein (Cdc42/Rac)-activated kinase 1                    | -1.94418 | 3.78E-09  | -2.51738 | 2.81E-12   |
| A_52_P504787 | EPHA7              | EPH receptor A7                                               | -1.94389 | 8.57E-07  | -2.24048 | 2.63E-08   |
| A_52_P39157  | COMMD3-BMI1        | COMMD3-BMI1 readthrough                                       | -1.94304 | 0.0001018 | 6.3675   | 4.60E-13   |
| A_51_P448563 | MYO7A              | myosin VIIA                                                   | -1.94116 | 2.65E-05  | 8.64139  | 7.87E-16   |
| A_52_P642662 | EFHD1              | EF-hand domain family, member D1                              | -1.93939 | 7.51E-05  | -2.27736 | 3.50E-06   |
| A_51_P245718 | KDM7A              | lysine (K)-specific demethylase 7A                            | -1.93834 | 0.0017382 | 2.27109  | 0.00019161 |
| A_51_P508341 | REEP1              | receptor accessory protein 1                                  | -1.93818 | 2.54E-10  | 1.63131  | 1.07E-07   |
| A_51_P454103 | MANBA              | mannosidase, beta A, lysosomal                                | -1.93737 | 1.40E-08  | -2.0858  | 1.65E-09   |
| A_52_P368214 | SPIRE1             | spire-type actin nucleation factor 1                          | -1.93723 | 1.01E-06  | -1.56353 | 0.00024107 |
| A_52_P579531 | Pdlim3             | PDZ and LIM domain 3                                          | -1.93586 | 1.31E-05  | 2.20373  | 7.97E-07   |
| A_51_P385114 | Snhg11             | small nucleolar RNA host gene 11                              | -1.93565 | 0.0008987 | -1.83627 | 0.00194992 |
| A_52_P635278 | ECE1               | endothelin converting enzyme 1                                | -1.93554 | 4.07E-08  | 3.29764  | 9.39E-14   |
| A_52_P144791 | NKX1-2             | NK1 homeobox 2                                                | -1.9355  | 0.001677  | -7.19345 | 4.14E-11   |
| A_51_P376238 | SERPING1           | serpin peptidase inhibitor, clade G (C1 inhibitor), member 1  | -1.93221 | 1.43E-08  | 2.30029  | 1.07E-10   |
| A_51_P495560 | TGM3               | transglutaminase 3                                            | -1.92973 | 0.0015984 | -2.00363 | 0.00094732 |
| A_52_P23225  | GPC3               | glypican 3                                                    | -1.92918 | 2.07E-05  | -2.7606  | 1.35E-08   |
| A_52_P638903 | CAST               | calpastatin                                                   | -1.92802 | 0.0013913 | -3.63892 | 1.37E-07   |
| A_52_P276935 | DNAJB6             | DnaJ (Hsp40) homolog, subfamily B, member 6                   | -1.92799 | 5.83E-08  | -4.16457 | 1.53E-15   |
| A_52_P291428 | Gm3383 (includes c | predicted gene 3383                                           | -1.92546 | 2.95E-05  | 1.51817  | 0.00365835 |
| A_51_P187679 | SLC9B1             | solute carrier family 9, subfamily B (NHA1, cation proton ant | -1.92332 | 8.88E-08  | -3.14382 | 5.47E-13   |
| A_51_P337195 | PIPOX              | pipecolic acid oxidase                                        | -1.92323 | 2.32E-10  | -3.9504  | 3.21E-18   |
| A_51_P306017 | DLL1               | delta-like 1 (Drosophila)                                     | -1.92066 | 1.21E-05  | 7.35241  | 9.22E-16   |
| A_51_P186735 | TESK2              | testis-specific kinase 2                                      | -1.91932 | 0.0001793 | -1.64916 | 0.00256335 |
| A_51_P135075 | PRR23A             | proline rich 23A                                              | -1.91911 | 6.67E-08  | 3.02707  | 7.77E-13   |
| A_52_P340894 | BOLL               | boule-like RNA-binding protein                                | -1.9184  | 0.0003217 | -2.59621 | 1.81E-06   |
| A_51_P343598 | 1500009L16Rik      | RIKEN cDNA 1500009L16 gene                                    | -1.91774 | 1.83E-07  | 2.88066  | 8.08E-12   |
| A_52_P214770 | ANKRD45            | ankyrin repeat domain 45                                      | -1.91291 | 1.34E-06  | -2.9752  | 5.21E-11   |

|               |               |                                                             |          |           |          |            |
|---------------|---------------|-------------------------------------------------------------|----------|-----------|----------|------------|
| A_52_P569218  | UTRN          | utrophin                                                    | -1.91277 | 2.72E-09  | -1.78546 | 2.53E-08   |
| A_51_P187121  | GJB4          | gap junction protein, beta 4, 30.3kDa                       | -1.91199 | 2.39E-06  | -3.61044 | 2.76E-12   |
| A_51_P451292  | PHACTR3       | phosphatase and actin regulator 3                           | -1.91174 | 2.51E-06  | -2.20761 | 7.97E-08   |
| A_51_P295525  | CMSS1         | cms1 ribosomal small subunit homolog (yeast)                | -1.91161 | 0.0021709 | 2.44631  | 6.99E-05   |
| A_51_P475138  | DUOX1         | dual oxidase 1                                              | -1.91031 | 7.44E-13  | 2.42477  | 3.15E-16   |
| A_51_P221972  | EEF2KMT       | eukaryotic elongation factor 2 lysine methyltransferase     | -1.9102  | 6.34E-10  | -2.24836 | 4.25E-12   |
| A_52_P471535  | CCDC116       | coiled-coil domain containing 116                           | -1.91009 | 0.0065118 | -3.34347 | 7.41E-06   |
| A_51_P465473  | BTF3L4        | basic transcription factor 3-like 4                         | -1.90871 | 2.18E-09  | -1.69364 | 1.16E-07   |
| A_52_P195809  | BDH2          | 3-hydroxybutyrate dehydrogenase, type 2                     | -1.90501 | 6.63E-07  | -9.0405  | 4.21E-19   |
| A_51_P140237  | FHL2          | four and a half LIM domains 2                               | -1.90263 | 0.0021641 | 4.3218   | 2.26E-08   |
| A_52_P451644  | NDN           | necdin, melanoma antigen (MAGE) family member               | -1.90254 | 2.64E-06  | 2.66402  | 1.09E-09   |
| A_51_P362959  | FBXO36        | F-box protein 36                                            | -1.90221 | 6.16E-10  | -1.58979 | 3.53E-07   |
| A_51_P518001  | CREB3L3       | cAMP responsive element binding protein 3-like 3            | -1.89984 | 0.0012752 | -2.19293 | 0.00014982 |
| A_52_P16419   | GPD1          | glycerol-3-phosphate dehydrogenase 1 (soluble)              | -1.89765 | 4.20E-08  | -6.3255  | 6.63E-19   |
| A_51_P331827  | SLC25A41      | solute carrier family 25, member 41                         | -1.89669 | 2.54E-05  | -5.88451 | 4.08E-14   |
| A_52_P518213  | HELZ          | helicase with zinc finger                                   | -1.89466 | 0.0053721 | 2.15606  | 0.00112709 |
| A_51_P249215  | PTGER2        | prostaglandin E receptor 2 (subtype EP2), 53kDa             | -1.89274 | 1.15E-08  | -4.24628 | 6.04E-17   |
| A_52_P592230  | DNAJA4        | DnaJ (Hsp40) homolog, subfamily A, member 4                 | -1.89154 | 0.0028356 | 1.79112  | 0.00572931 |
| A_52_P327923  | MEOX1         | mesenchyme homeobox 1                                       | -1.89143 | 0.0005452 | -4.64929 | 3.62E-10   |
| A_51_P488368  | MYOT          | myotilin                                                    | -1.89112 | 3.69E-06  | 2.31087  | 3.21E-08   |
| A_52_P424767  | RBBP4         | retinoblastoma binding protein 4                            | -1.88915 | 3.29E-08  | -1.64611 | 2.36E-06   |
| A_52_P130570  | D1Pas1        | DNA segment, Chr 1, Pasteur Institute 1                     | -1.88831 | 4.76E-08  | 5.79548  | 2.32E-18   |
| A_52_P69281   | NUSAP1        | nucleolar and spindle associated protein 1                  | -1.88829 | 0.0058408 | -4.28517 | 2.02E-07   |
| A_52_P101972  | SEN2          | SUMO1/sentrin/SMT3 specific peptidase 2                     | -1.88795 | 0.0003873 | -2.57309 | 1.86E-06   |
| A_52_P780     |               |                                                             | -1.88586 | 0.0009766 | -1.67084 | 0.00590055 |
| A_52_P471395  | IFNGR2        | interferon gamma receptor 2 (interferon gamma transducer    | -1.88544 | 9.09E-08  | -2.87454 | 1.87E-12   |
| A_51_P134228  | HLF           | hepatic leukemia factor                                     | -1.88526 | 1.82E-06  | -1.58899 | 0.00014879 |
| A_51_P429567  | LMOD1         | leiomodion 1 (smooth muscle)                                | -1.88459 | 0.004809  | 2.94452  | 1.52E-05   |
| A_51_P438461  | WDR34         | WD repeat domain 34                                         | -1.88444 | 4.07E-07  | -1.84237 | 7.57E-07   |
| A_51_P410346  | PTCH2         | patched 2                                                   | -1.88342 | 3.65E-06  | -1.87231 | 4.22E-06   |
| A_51_P418147  | FN3KRP        | fructosamine 3 kinase related protein                       | -1.88182 | 1.30E-06  | -2.24249 | 1.60E-08   |
| A_52_P330956  | FKBP6         | FK506 binding protein 6, 36kDa                              | -1.88135 | 1.23E-06  | 3.33664  | 2.58E-12   |
| A_52_P61188   | ARNTL2        | aryl hydrocarbon receptor nuclear translocator-like 2       | -1.87933 | 0.0049315 | 7.16606  | 2.77E-10   |
| A_51_P161582  | DDR1          | discoidin domain receptor tyrosine kinase 1                 | -1.8787  | 5.98E-05  | 2.05504  | 9.56E-06   |
| A_51_P314045  | CAMSAP3       | calmodulin regulated spectrin-associated protein family, me | -1.8777  | 4.26E-09  | 3.37441  | 1.03E-15   |
| A_52_P199922  |               |                                                             | -1.87612 | 0.0047851 | -2.32169 | 0.00031911 |
| A_52_P165705  | Cd1d2         | CD1d2 antigen                                               | -1.87491 | 0.0043361 | -2.13626 | 0.00082144 |
| A_51_P319070  | RETSAT        | retinol saturase (all-trans-retinol 13,14-reductase)        | -1.87484 | 4.54E-13  | 1.81366  | 1.65E-12   |
| A_51_P130057  | PPM1K         | protein phosphatase, Mg2+/Mn2+ dependent, 1K                | -1.87302 | 4.02E-05  | -1.99304 | 1.08E-05   |
| A_52_P609913  | SYNRG         | synergin, gamma                                             | -1.86563 | 8.99E-07  | 3.79002  | 1.08E-13   |
| A_52_P468103  |               |                                                             | -1.86517 | 0.0002804 | -1.97534 | 9.95E-05   |
| A_51_P286488  | IER3          | immediate early response 3                                  | -1.86367 | 5.50E-07  | -4.51319 | 2.38E-15   |
| A_51_P427009  | NMT2          | N-myristoyltransferase 2                                    | -1.86186 | 1.35E-05  | -2.01414 | 2.22E-06   |
| A_51_P185757  | CASZ1         | castor zinc finger 1                                        | -1.8562  | 9.90E-05  | 1.54328  | 0.00357329 |
| A_52_P1171614 | POU4F1        | POU class 4 homeobox 1                                      | -1.85556 | 0.0047173 | 2.19765  | 0.00053366 |
| A_51_P269852  | S100A13       | S100 calcium binding protein A13                            | -1.85547 | 0.0004048 | -1.62966 | 0.00366143 |
| A_51_P290840  | FRMD4A        | FERM domain containing 4A                                   | -1.85518 | 5.64E-09  | -1.55085 | 2.70E-06   |
| A_52_P145415  | PTCH2         | patched 2                                                   | -1.85518 | 6.98E-07  | -2.11567 | 2.11E-08   |
| A_52_P1076565 | 1110002J07Rik | RIKEN cDNA 1110002J07 gene                                  | -1.85464 | 4.37E-06  | -2.13027 | 1.48E-07   |
| A_51_P424999  | ICT1          | immature colon carcinoma transcript 1                       | -1.85048 | 9.26E-06  | -2.29029 | 6.43E-08   |
| A_52_P522372  | AARD          | alanine and arginine rich domain containing protein         | -1.84948 | 1.46E-08  | -1.91328 | 5.02E-09   |
| A_51_P290576  | PLK2          | polo-like kinase 2                                          | -1.84925 | 6.19E-05  | 13.7049  | 3.85E-18   |
| A_52_P271528  | PSRC1         | proline/serine-rich coiled-coil 1                           | -1.84574 | 4.48E-06  | 2.03877  | 3.81E-07   |



|               |               |                                                              |          |           |          |            |
|---------------|---------------|--------------------------------------------------------------|----------|-----------|----------|------------|
| A_51_P478569  | ADAMTSL1      | ADAMTS-like 1                                                | -1.84557 | 0.0023599 | -1.66983 | 0.00920355 |
| A_51_P161612  | CCNG1         | cyclin G1                                                    | -1.8454  | 1.04E-10  | 3.46167  | 3.12E-18   |
| A_51_P168395  | TTC30A        | tetratricopeptide repeat domain 30A                          | -1.8452  | 0.0001837 | 1.54903  | 0.00464196 |
| A_52_P214772  | ANKRD45       | ankyrin repeat domain 45                                     | -1.84513 | 0.0001193 | -2.77068 | 4.32E-08   |
| A_51_P275496  |               |                                                              | -1.84455 | 0.0001444 | -1.86056 | 0.00012194 |
| A_51_P211573  | WDR47         | WD repeat domain 47                                          | -1.8438  | 0.0001377 | -1.52796 | 0.00486675 |
| A_52_P322941  | C7orf57       | chromosome 7 open reading frame 57                           | -1.84335 | 0.0086609 | -2.77121 | 6.21E-05   |
| A_51_P519251  | NUPR1         | nuclear protein, transcriptional regulator, 1                | -1.84246 | 3.65E-05  | 2.68806  | 1.23E-08   |
| A_51_P200776  | GRSF1         | G-rich RNA sequence binding factor 1                         | -1.83991 | 3.52E-06  | -1.52954 | 0.00040578 |
| A_51_P131281  | EXD1          | exonuclease 3'-5' domain containing 1                        | -1.83986 | 5.02E-05  | -1.92109 | 1.99E-05   |
| A_51_P392687  | VIM           | vimentin                                                     | -1.83927 | 1.22E-09  | -3.60034 | 2.41E-17   |
| A_52_P480532  | GPC4          | glypican 4                                                   | -1.83876 | 1.44E-06  | 1.56484  | 0.00011598 |
| A_52_P661982  | Obsl1         | obscurin-like 1                                              | -1.83848 | 1.15E-05  | 1.54136  | 0.00075435 |
| A_51_P471672  | ACBD7         | acyl-CoA binding domain containing 7                         | -1.83771 | 0.0009777 | -6.21076 | 1.01E-11   |
| A_51_P479321  | ACSS1         | acyl-CoA synthetase short-chain family member 1              | -1.83647 | 5.38E-08  | -2.3875  | 3.15E-11   |
| A_51_P346815  | Arxes1/Arxes2 | adipocyte-related X-chromosome expressed sequence 2          | -1.83524 | 9.59E-08  | 1.99165  | 8.56E-09   |
| A_51_P192979  | DCUN1D3       | DCN1, defective in cullin neddylation 1, domain containing 3 | -1.83431 | 4.48E-08  | 2.05646  | 1.45E-09   |
| A_52_P722921  |               |                                                              | -1.8279  | 0.0017878 | -3.30443 | 1.97E-07   |
| A_52_P1036456 |               |                                                              | -1.82765 | 0.0021801 | -1.84541 | 0.00189595 |
| A_52_P260069  | MAGEB2        | melanoma antigen family B2                                   | -1.82639 | 0.0010655 | 4.88215  | 2.31E-10   |
| A_51_P311785  | MAN2B2        | mannosidase, alpha, class 2B, member 2                       | -1.82567 | 0.0001127 | 2.58638  | 1.05E-07   |
| A_51_P215922  | CASP6         | caspase 6, apoptosis-related cysteine peptidase              | -1.82509 | 7.67E-13  | -1.98307 | 3.35E-14   |
| A_51_P248122  | BBC3          | BCL2 binding component 3                                     | -1.82239 | 1.36E-07  | 4.39511  | 1.95E-16   |
| A_52_P240036  | PLCH1         | phospholipase C, eta 1                                       | -1.82198 | 3.04E-05  | -1.52905 | 0.00151416 |
| A_52_P311566  | MAPK9         | mitogen-activated protein kinase 9                           | -1.82161 | 1.57E-07  | 1.51416  | 4.89E-05   |
| A_52_P682745  | DOCK4         | dedicator of cytokinesis 4                                   | -1.82105 | 0.0001117 | -1.93932 | 3.08E-05   |
| A_51_P253642  | EIF2AK3       | eukaryotic translation initiation factor 2-alpha kinase 3    | -1.82075 | 0.0001423 | 1.66871  | 0.00079587 |
| A_52_P36900   | UBE2Z         | ubiquitin-conjugating enzyme E2Z                             | -1.81959 | 9.20E-06  | -1.82144 | 8.98E-06   |
| A_51_P437176  | TRIM47        | tripartite motif containing 47                               | -1.81922 | 3.60E-06  | 4.22849  | 4.69E-14   |
| A_51_P430620  | SLC25A12      | solute carrier family 25 (aspartate/glutamate carrier), memt | -1.81525 | 5.58E-09  | -1.81319 | 5.80E-09   |
| A_51_P206197  | GTF2A1L       | general transcription factor IIA, 1-like                     | -1.81503 | 0.000326  | 2.38298  | 2.01E-06   |
| A_51_P303089  | TTC28         | tetratricopeptide repeat domain 28                           | -1.81444 | 0.0015334 | 2.45377  | 1.26E-05   |
| A_51_P166818  | RBM43         | RNA binding motif protein 43                                 | -1.81396 | 1.47E-06  | 2.79105  | 3.38E-11   |
| A_51_P444669  | TMEM106A      | transmembrane protein 106A                                   | -1.81121 | 2.06E-09  | -4.48699 | 3.72E-19   |
| A_51_P291749  | PECR          | peroxisomal trans-2-enoyl-CoA reductase                      | -1.8111  | 0.0001516 | -2.38744 | 6.05E-07   |
| A_52_P675857  |               |                                                              | -1.81062 | 6.26E-05  | 1.87527  | 2.93E-05   |
| A_52_P297062  | LNX1          | ligand of numb-protein X 1, E3 ubiquitin protein ligase      | -1.81    | 7.89E-08  | -2.46962 | 1.22E-11   |
| A_52_P199299  | URGCP         | upregulator of cell proliferation                            | -1.80639 | 2.64E-08  | 1.71569  | 1.44E-07   |
| A_52_P202895  | MTUS1         | microtubule associated tumor suppressor 1                    | -1.80592 | 0.00041   | -1.93028 | 0.00012085 |
| A_51_P479696  | CDS1          | CDP-diacylglycerol synthase (phosphatidate cytidyltransfer   | -1.80513 | 5.68E-08  | 1.52635  | 1.43E-05   |
| A_51_P233727  | SAPCD1        | suppressor APC domain containing 1                           | -1.80466 | 5.95E-10  | -2.87119 | 6.60E-16   |
| A_52_P664280  | UPF2          | UPF2 regulator of nonsense transcripts homolog (yeast)       | -1.80257 | 0.0041144 | 1.88088  | 0.00232013 |
| A_51_P201730  | MPDU1         | mannose-P-dolichol utilization defect 1                      | -1.8025  | 2.92E-08  | -2.48136 | 2.71E-12   |
| A_51_P274223  | FGF17         | fibroblast growth factor 17                                  | -1.80233 | 2.88E-05  | -4.19296 | 1.15E-12   |
| A_51_P175567  | DACT1         | dishevelled-binding antagonist of beta-catenin 1             | -1.80206 | 0.000714  | -2.47955 | 2.66E-06   |
| A_52_P548227  | MRPL38        | mitochondrial ribosomal protein L38                          | -1.80059 | 2.79E-06  | -1.56121 | 0.00013267 |
| A_51_P200564  |               |                                                              | -1.79949 | 0.0009848 | -1.53664 | 0.0118866  |
| A_51_P295192  | NFKBIA        | nuclear factor of kappa light polypeptide gene enhancer in E | -1.79838 | 1.13E-07  | -1.85914 | 4.05E-08   |
| A_51_P475613  | FAHD2B        | fumarylacetoacetate hydrolase domain containing 2B           | -1.79589 | 2.68E-07  | -1.90146 | 4.92E-08   |
| A_51_P406188  | ASB10         | ankyrin repeat and SOCS box containing 10                    | -1.79575 | 0.0060393 | 4.12036  | 8.06E-08   |
| A_52_P344427  | 2610036A22Rik | RIKEN cDNA 2610036A22 gene                                   | -1.79527 | 1.56E-07  | -1.53078 | 2.47E-05   |
| A_52_P381484  | SPON2         | spondin 2, extracellular matrix protein                      | -1.79411 | 2.30E-05  | 9.46647  | 7.98E-18   |
| A_51_P199974  | SLC4A8        | solute carrier family 4, sodium bicarbonate cotransporter, m | -1.79381 | 9.43E-05  | 4.14903  | 9.46E-12   |

|              |               |                                                                   |          |           |          |            |
|--------------|---------------|-------------------------------------------------------------------|----------|-----------|----------|------------|
| A_52_P30632  | C9orf116      | chromosome 9 open reading frame 116                               | -1.79042 | 3.90E-10  | 6.87186  | 3.13E-23   |
| A_51_P260433 | PTPN14        | protein tyrosine phosphatase, non-receptor type 14                | -1.78945 | 0.0004905 | 5.07528  | 1.12E-11   |
| A_52_P227974 | NKAIN4        | Na <sup>+</sup> /K <sup>+</sup> transporting ATPase interacting 4 | -1.78921 | 3.92E-07  | -3.81568 | 5.16E-15   |
| A_51_P431179 | 4833419E13Rik | RIKEN cDNA 4833419E13 gene                                        | -1.78619 | 0.0056539 | -1.71647 | 0.00934092 |
| A_51_P288558 | CFAP52        | cilia and flagella associated protein 52                          | -1.78505 | 6.57E-05  | -2.81515 | 4.21E-09   |
| A_51_P236464 | METAP1D       | methionyl aminopeptidase type 1D (mitochondrial)                  | -1.78405 | 2.24E-08  | -1.66979 | 2.13E-07   |
| A_52_P57296  | PTPN14        | protein tyrosine phosphatase, non-receptor type 14                | -1.7832  | 4.33E-07  | 5.30505  | 1.86E-17   |
| A_51_P209451 | ZBTB24        | zinc finger and BTB domain containing 24                          | -1.78288 | 5.05E-05  | 1.55681  | 0.00103814 |
| A_51_P137481 | Sp3os         | trans-acting transcription factor 3, opposite strand              | -1.78145 | 0.0020666 | -1.86408 | 0.00103165 |
| A_51_P302738 | UPP1          | uridine phosphorylase 1                                           | -1.77989 | 0.0002594 | -5.05216 | 2.49E-12   |
| A_51_P254262 | NXPH3         | neurexophilin 3                                                   | -1.77838 | 2.49E-06  | -1.88997 | 4.72E-07   |
| A_52_P18068  | TXLNG         | taxilin gamma                                                     | -1.77824 | 0.0019317 | -4.11123 | 3.86E-09   |
| A_51_P378856 | PFKP          | phosphofructokinase, platelet                                     | -1.77773 | 1.09E-06  | -1.68191 | 5.42E-06   |
| A_52_P240671 | DDX27         | DEAD (Asp-Glu-Ala-Asp) box polypeptide 27                         | -1.77662 | 9.93E-05  | 2.1372   | 1.88E-06   |
| A_52_P772950 | CYSRT1        | cysteine-rich tail protein 1                                      | -1.77244 | 0.0006886 | -1.54289 | 0.0073517  |
| A_52_P3723   | NFIB          | nuclear factor I/B                                                | -1.77241 | 5.74E-05  | -4.98648 | 1.29E-13   |
| A_52_P395149 | SMTNL2        | smoothelin-like 2                                                 | -1.77231 | 4.37E-06  | -2.60714 | 2.90E-10   |
| A_52_P611771 | Platr20       | pluripotency associated transcript 20                             | -1.77212 | 0.0021089 | -6.56414 | 8.43E-12   |
| A_51_P338040 | VOPP1         | vesicular, overexpressed in cancer, prosurvival protein 1         | -1.77122 | 4.06E-05  | 9.51065  | 1.26E-17   |
| A_52_P597323 | SSH1          | slingshot protein phosphatase 1                                   | -1.77019 | 8.85E-05  | -1.74396 | 0.00012257 |
| A_51_P466285 | HOXA10        | homeobox A10                                                      | -1.76966 | 0.0062373 | -2.73827 | 1.52E-05   |
| A_52_P384394 | BMF           | Bcl2 modifying factor                                             | -1.76892 | 0.0001553 | -2.758   | 1.83E-08   |
| A_51_P277006 | CHST8         | carbohydrate (N-acetylgalactosamine 4-0) sulfotransferase 8       | -1.76879 | 1.91E-06  | -2.59754 | 9.30E-11   |
| A_51_P407351 | LY75          | lymphocyte antigen 75                                             | -1.76855 | 2.80E-06  | -3.05838 | 4.43E-12   |
| A_52_P219473 | CDC6          | cell division cycle 6                                             | -1.76822 | 0.0014259 | -1.68419 | 0.00310613 |
| A_51_P514177 | LRRC2         | leucine rich repeat containing 2                                  | -1.7676  | 2.16E-07  | -3.5769  | 4.50E-15   |
| A_52_P679380 | TMPPE         | transmembrane protein with metallophosphoesterase domain          | -1.76754 | 1.01E-07  | 4.98753  | 3.95E-18   |
| A_52_P279845 | SORCS2        | sortilin-related VPS10 domain containing receptor 2               | -1.76581 | 0.0013682 | 1.71445  | 0.00220744 |
| A_51_P321385 | AMOT          | angiomin                                                          | -1.76512 | 0.0003552 | -1.81663 | 0.00020391 |
| A_51_P335849 | CTNNBIP1      | catenin, beta interacting protein 1                               | -1.76504 | 9.90E-11  | -1.51754 | 5.54E-08   |
| A_51_P475155 | RNF19B        | ring finger protein 19B                                           | -1.76494 | 0.0001048 | -4.49992 | 1.65E-12   |
| A_51_P451409 | Ttll13        | tubulin tyrosine ligase-like family, member 13                    | -1.76415 | 0.0013027 | -5.01619 | 6.91E-11   |
| A_52_P169048 | DNMT3A        | DNA (cytosine-5-)-methyltransferase 3 alpha                       | -1.76373 | 2.24E-09  | -2.38623 | 1.45E-13   |
| A_52_P15073  | METTL20       | methyltransferase like 20                                         | -1.76316 | 7.03E-05  | -15.0404 | 2.37E-19   |
| A_51_P492897 | C9orf43       | chromosome 9 open reading frame 43                                | -1.76302 | 0.0014314 | -1.74412 | 0.0017048  |
| A_51_P295967 | PROC          | protein C (inactivator of coagulation factors Va and VIIIa)       | -1.76154 | 1.58E-05  | -1.54907 | 0.00039315 |
| A_51_P308298 | MYL9          | myosin, light chain 9, regulatory                                 | -1.76147 | 1.35E-05  | 2.66957  | 6.95E-10   |
| A_51_P500996 | FBXL20        | F-box and leucine-rich repeat protein 20                          | -1.76112 | 2.32E-06  | 2.15173  | 1.02E-08   |
| A_51_P224311 | POPDC2        | popeye domain containing 2                                        | -1.7608  | 0.0002825 | 1.90584  | 5.84E-05   |
| A_52_P652968 | STEAP3        | STEAP family member 3, metalloreductase                           | -1.76019 | 0.0004639 | 1.7331   | 0.00062008 |
| A_51_P244824 | DAPP1         | dual adaptor of phosphotyrosine and 3-phosphoinositides           | -1.75924 | 1.72E-05  | -2.43853 | 6.88E-09   |
| A_52_P254667 |               |                                                                   | -1.75915 | 2.39E-05  | 1.64167  | 0.00012947 |
| A_52_P877156 | LOC102634683  | uncharacterized LOC102634683                                      | -1.75823 | 0.0004133 | 1.7474   | 0.00046482 |
| A_51_P367866 | EGR1          | early growth response 1                                           | -1.75795 | 8.03E-07  | 5.80367  | 6.34E-18   |
| A_51_P264634 | STRBP         | spermatid perinuclear RNA binding protein                         | -1.75789 | 0.0060526 | -2.04092 | 0.00080578 |
| A_52_P328350 | RYR3          | ryanodine receptor 3                                              | -1.7569  | 6.10E-05  | -4.41925 | 6.54E-13   |
| A_52_P249672 | 4833417J20Rik | RIKEN cDNA 4833417J20 gene                                        | -1.75678 | 0.0040938 | -2.92968 | 2.01E-06   |
| A_51_P340402 | EEFSEC        | eukaryotic elongation factor, selenocysteine-tRNA-specific        | -1.75605 | 7.35E-09  | -1.534   | 1.12E-06   |
| A_51_P131480 | RPTOR         | regulatory associated protein of MTOR, complex 1                  | -1.7545  | 0.00116   | 1.66667  | 0.00272964 |
| A_51_P492482 | CSTF2T        | cleavage stimulation factor, 3' pre-RNA, subunit 2, 64kDa, ta     | -1.75354 | 2.37E-12  | 1.85845  | 2.27E-13   |
| A_52_P283378 | ZNF442        | zinc finger protein 442                                           | -1.75335 | 0.0004805 | -1.60999 | 0.0023235  |
| A_52_P373251 | ATP11A        | ATPase, class VI, type 11A                                        | -1.75292 | 4.08E-06  | -3.08075 | 4.63E-12   |
| A_51_P181400 | EFCAB2        | EF-hand calcium binding domain 2                                  | -1.75283 | 2.29E-07  | -1.61075 | 3.48E-06   |

|               |                |                                                               |          |           |          |            |
|---------------|----------------|---------------------------------------------------------------|----------|-----------|----------|------------|
| A_51_P216527  | RNF185         | ring finger protein 185                                       | -1.75217 | 1.85E-08  | 1.52413  | 2.86E-06   |
| A_51_P369381  | SLC18B1        | solute carrier family 18, subfamily B, member 1               | -1.75211 | 6.77E-05  | -3.1218  | 3.04E-10   |
| A_52_P324986  | SRPRB          | signal recognition particle receptor, B subunit               | -1.75167 | 1.19E-05  | -1.50964 | 0.0005474  |
| A_52_P555629  | Zfp862-ps      | zinc finger protein 862, pseudogene                           | -1.74988 | 7.44E-06  | -3.76484 | 2.25E-13   |
| A_51_P437144  | DYNLL2         | dynein, light chain, LC8-type 2                               | -1.74731 | 2.96E-06  | 1.81634  | 1.00E-06   |
| A_52_P19159   | MTUS1          | microtubule associated tumor suppressor 1                     | -1.74713 | 0.0083125 | 2.4775   | 7.88E-05   |
| A_51_P160363  | UTRN           | utrophin                                                      | -1.74546 | 0.0018678 | -1.54764 | 0.0118246  |
| A_52_P223618  | RCN3           | reticulocalbin 3, EF-hand calcium binding domain              | -1.74533 | 4.73E-08  | -1.6555  | 2.90E-07   |
| A_52_P230688  | REP15          | RAB15 effector protein                                        | -1.74462 | 8.00E-05  | -1.93853 | 7.37E-06   |
| A_52_P547491  | LURAP1         | leucine rich adaptor protein 1                                | -1.7442  | 0.0008148 | -2.04752 | 4.38E-05   |
| A_51_P265999  | GEMIN8         | gem (nuclear organelle) associated protein 8                  | -1.74336 | 1.68E-07  | -1.55045 | 8.24E-06   |
| A_51_P514712  | PARP14         | poly (ADP-ribose) polymerase family, member 14                | -1.74145 | 3.73E-05  | -4.28492 | 3.02E-13   |
| A_51_P177451  | GPA33          | glycoprotein A33 (transmembrane)                              | -1.74123 | 5.29E-06  | -2.85227 | 2.63E-11   |
| A_51_P339344  | TMEM81         | transmembrane protein 81                                      | -1.73985 | 0.0007439 | -1.59561 | 0.00345505 |
| A_52_P640686  | CIT            | citron rho-interacting serine/threonine kinase                | -1.73962 | 0.0001086 | -1.77008 | 7.39E-05   |
| A_52_P577729  | RNF169         | ring finger protein 169                                       | -1.73961 | 4.84E-06  | 4.13848  | 1.60E-14   |
| A_52_P572808  | GPAT3          | glycerol-3-phosphate acyltransferase 3                        | -1.73917 | 1.32E-06  | 1.70868  | 2.23E-06   |
| A_52_P202276  | FOCAD          | focadhesin                                                    | -1.73893 | 0.0010868 | 1.72947  | 0.00119422 |
| A_51_P312069  | E130104P22Rik  | RIKEN cDNA E130104P22 gene                                    | -1.73818 | 0.0024867 | -1.81221 | 0.00129911 |
| A_51_P175205  | RPS6KB1        | ribosomal protein S6 kinase, 70kDa, polypeptide 1             | -1.73812 | 3.54E-05  | -1.53473 | 0.0007066  |
| A_51_P236469  | METAP1D        | methionyl aminopeptidase type 1D (mitochondrial)              | -1.73808 | 5.62E-08  | -1.59436 | 1.12E-06   |
| A_52_P431872  | PTCD3          | pentatricopeptide repeat domain 3                             | -1.73789 | 5.49E-11  | -1.6221  | 9.87E-10   |
| A_52_P358860  | GSS            | glutathione synthetase                                        | -1.73756 | 0.0001155 | 1.6634   | 0.00030112 |
| A_51_P482121  | EDN2           | endothelin 2                                                  | -1.73652 | 4.14E-05  | -4.16656 | 5.13E-13   |
| A_51_P378699  | CCDC169-SOHLH2 | CCDC169-SOHLH2 readthrough                                    | -1.73588 | 4.37E-06  | 1.96639  | 1.44E-07   |
| A_52_P678717  | CSNK1G3        | casein kinase 1, gamma 3                                      | -1.7345  | 0.0041235 | -1.60191 | 0.0123987  |
| A_51_P425798  | MTUS2          | microtubule associated tumor suppressor candidate 2           | -1.73408 | 7.86E-05  | 3.01567  | 5.09E-10   |
| A_51_P138502  | TTC28          | tetratricopeptide repeat domain 28                            | -1.73386 | 0.0010153 | 2.59195  | 7.21E-07   |
| A_52_P1026777 | ECSCR          | endothelial cell surface expressed chemotaxis and apoptosis   | -1.73305 | 0.0002714 | -2.76316 | 2.21E-08   |
| A_52_P362144  | CEP41          | centrosomal protein 41kDa                                     | -1.73293 | 0.0019888 | -1.91953 | 0.00037273 |
| A_51_P342466  | NUFIP2         | nuclear fragile X mental retardation protein interacting prot | -1.73282 | 1.56E-05  | -1.90415 | 1.38E-06   |
| A_51_P222773  | FOXA2          | forkhead box A2                                               | -1.73036 | 6.59E-06  | 2.06314  | 6.02E-08   |
| A_52_P478420  | Cyp2d22        | cytochrome P450, family 2, subfamily d, polypeptide 22        | -1.73013 | 0.0081765 | -1.79286 | 0.0051927  |
| A_51_P141223  |                |                                                               | -1.72766 | 0.0088992 | -3.08715 | 3.17E-06   |
| A_51_P226472  | AKAP2          | A kinase (PRKA) anchor protein 2                              | -1.72725 | 0.0001718 | 1.6691   | 0.00035768 |
| A_51_P515002  | RALY           | RALY heterogeneous nuclear ribonucleoprotein                  | -1.72567 | 0.0009896 | -4.59179 | 5.27E-11   |
| A_51_P352562  | MRPL38         | mitochondrial ribosomal protein L38                           | -1.72449 | 6.56E-09  | -1.76626 | 2.75E-09   |
| A_52_P277654  | PDK1           | pyruvate dehydrogenase kinase, isozyme 1                      | -1.72297 | 4.62E-09  | -3.59195 | 7.12E-18   |
| A_52_P551184  | PTPN13         | protein tyrosine phosphatase, non-receptor type 13 (APO-1/    | -1.72258 | 1.01E-06  | -3.24597 | 9.32E-14   |
| A_52_P467449  | ALOX12         | arachidonate 12-lipoxygenase                                  | -1.7225  | 1.13E-06  | 1.76694  | 5.23E-07   |
| A_51_P493117  | SLC16A9        | solute carrier family 16, member 9                            | -1.72159 | 0.0013404 | 10.1943  | 4.50E-15   |
| A_51_P488991  | OAF            | out at first homolog                                          | -1.71968 | 1.84E-05  | 1.77905  | 7.65E-06   |
| A_52_P193429  | ZFH3           | zinc finger homeobox 3                                        | -1.71929 | 0.0009388 | 2.95216  | 4.81E-08   |
| A_51_P318488  | AKT3           | v-akt murine thymoma viral oncogene homolog 3                 | -1.71925 | 0.0055976 | -1.74778 | 0.00446162 |
| A_52_P463518  | CD200R1        | CD200 receptor 1                                              | -1.7184  | 0.0053494 | 2.05062  | 0.00041397 |
| A_51_P214516  | NIPSNAP1       | nipsnap homolog 1 (C. elegans)                                | -1.71761 | 4.67E-12  | -2.14856 | 1.00E-15   |
| A_51_P376127  | AIRE           | autoimmune regulator                                          | -1.71646 | 1.36E-05  | -28.7434 | 7.52E-24   |
| A_52_P859333  |                |                                                               | -1.71625 | 0.0014014 | -5.06159 | 2.39E-11   |
| A_52_P1019763 | Panct2         | pluripotency-associated noncoding transcript 2                | -1.71595 | 0.0038189 | -1.77718 | 0.00226766 |
| A_52_P419059  | FCGBP          | Fc fragment of IgG binding protein                            | -1.71594 | 0.000191  | 15.8623  | 3.40E-19   |
| A_52_P546135  | ANKRD40        | ankyrin repeat domain 40                                      | -1.71501 | 5.37E-06  | 1.74793  | 3.15E-06   |
| A_51_P396385  | MARS2          | methionyl-tRNA synthetase 2, mitochondrial                    | -1.71482 | 9.91E-06  | -2.6271  | 2.20E-10   |
| A_52_P70064   | SAPCD1         | suppressor APC domain containing 1                            | -1.71356 | 1.56E-08  | -2.56959 | 5.87E-14   |

|              |                                       |                                                              |          |           |          |            |
|--------------|---------------------------------------|--------------------------------------------------------------|----------|-----------|----------|------------|
| A_51_P412817 | DNAH2                                 | dynein, axonemal, heavy chain 2                              | -1.7128  | 0.0001827 | -4.36666 | 2.20E-12   |
| A_52_P31246  | SCMH1                                 | sex comb on midleg homolog 1 (Drosophila)                    | -1.71264 | 0.0002773 | 3.07475  | 2.02E-09   |
| A_52_P58024  | Gm20765 (includes predicted gene 8764 |                                                              | -1.7123  | 0.0001271 | 3.51397  | 4.19E-11   |
| A_51_P488704 | ASB16                                 | ankyrin repeat and SOCS box containing 16                    | -1.71225 | 6.23E-05  | 1.77139  | 2.77E-05   |
| A_51_P242634 | DUSP16                                | dual specificity phosphatase 16                              | -1.70961 | 0.0002811 | -1.73908 | 0.00019662 |
| A_51_P136803 | KIF9                                  | kinesin family member 9                                      | -1.70863 | 0.004229  | -5.18345 | 2.54E-10   |
| A_51_P311038 | ADAMTS15                              | ADAM metalloproteinase with thrombospondin type 1 motif,     | -1.70749 | 0.0085243 | -3.6809  | 1.72E-07   |
| A_52_P570690 | ATP1B2                                | ATPase, Na+/K+ transporting, beta 2 polypeptide              | -1.70735 | 1.24E-05  | 1.71954  | 1.02E-05   |
| A_51_P484551 | SLC27A2                               | solute carrier family 27 (fatty acid transporter), member 2  | -1.70621 | 0.0085401 | -6.77039 | 7.29E-11   |
| A_52_P473419 | EPB41L4A                              | erythrocyte membrane protein band 4.1 like 4A                | -1.7054  | 1.16E-05  | -2.57331 | 3.57E-10   |
| A_52_P458319 | ACAP1                                 | ArfGAP with coiled-coil, ankyrin repeat and PH domains 1     | -1.70439 | 5.07E-07  | -1.84743 | 3.99E-08   |
| A_51_P192847 | GHDC                                  | GH3 domain containing                                        | -1.70388 | 0.0051882 | 2.20276  | 0.00011069 |
| A_51_P304397 | CPM                                   | carboxypeptidase M                                           | -1.70206 | 0.0003664 | 2.30442  | 7.00E-07   |
| A_52_P26746  | UNC13B                                | unc-13 homolog B (C. elegans)                                | -1.70205 | 0.0044669 | -1.90129 | 0.00084944 |
| A_51_P159612 | HEBP2                                 | heme binding protein 2                                       | -1.70121 | 7.71E-09  | 2.69311  | 5.19E-15   |
| A_51_P468054 | SMYD1                                 | SET and MYND domain containing 1                             | -1.69972 | 0.0002397 | -1.57611 | 0.00118479 |
| A_52_P505277 | UBXN10                                | UBX domain protein 10                                        | -1.69736 | 0.0003617 | -1.62719 | 0.00085752 |
| A_52_P342836 | Gm3383 (includes predicted gene 3383  |                                                              | -1.69598 | 5.47E-06  | 1.59983  | 2.95E-05   |
| A_51_P511015 | FZD9                                  | frizzled class receptor 9                                    | -1.69503 | 7.44E-07  | 1.74436  | 2.99E-07   |
| A_52_P287246 | HPCA                                  | hippocalcin                                                  | -1.69449 | 0.0030441 | 1.6288   | 0.00560399 |
| A_51_P369371 | UBTD1                                 | ubiquitin domain containing 1                                | -1.69206 | 4.95E-05  | 2.04524  | 4.64E-07   |
| A_51_P505521 | HIST4H4                               | histone cluster 4, H4                                        | -1.69068 | 0.0032844 | 4.21189  | 1.49E-09   |
| A_51_P433091 | PURB                                  | purine-rich element binding protein B                        | -1.6904  | 1.25E-05  | 2.10429  | 3.63E-08   |
| A_52_P540462 | LYRM9                                 | LYR motif containing 9                                       | -1.69009 | 1.93E-07  | -1.7092  | 1.32E-07   |
| A_51_P385054 | PAK1                                  | p21 protein (Cdc42/Rac)-activated kinase 1                   | -1.68872 | 4.49E-10  | -2.90328 | 1.66E-17   |
| A_51_P204387 | TMEM63C                               | transmembrane protein 63C                                    | -1.6886  | 1.07E-05  | -1.63141 | 2.80E-05   |
| A_51_P233825 | AKAP1                                 | A kinase (PRKA) anchor protein 1                             | -1.68853 | 0.0028406 | 2.03153  | 0.00013281 |
| A_51_P323770 | Wfdc15a                               | WAP four-disulfide core domain 15A                           | -1.68818 | 0.0007044 | 11.1899  | 1.20E-16   |
| A_51_P337696 | UBE2G1                                | ubiquitin-conjugating enzyme E2G 1                           | -1.68798 | 0.0001131 | -1.63165 | 0.00024901 |
| A_51_P163252 | SCHIP1                                | schwannomin interacting protein 1                            | -1.68771 | 9.52E-06  | -2.4579  | 5.06E-10   |
| A_51_P162222 | Tsx                                   | testis specific X-linked gene                                | -1.68717 | 0.0032598 | -2.08056 | 0.00010679 |
| A_51_P174943 | LAMC2                                 | laminin, gamma 2                                             | -1.68665 | 0.0019862 | 4.45229  | 1.70E-10   |
| A_52_P365265 | GPATCH2                               | G patch domain containing 2                                  | -1.68531 | 0.0002324 | -1.78846 | 6.29E-05   |
| A_51_P356303 | STX8                                  | syntaxin 8                                                   | -1.6851  | 0.0001067 | -2.84942 | 8.44E-10   |
| A_52_P269158 | PID1                                  | phosphotyrosine interaction domain containing 1              | -1.68459 | 4.71E-06  | 6.42766  | 3.30E-18   |
| A_52_P205695 | METTL7A                               | methyltransferase like 7A                                    | -1.68429 | 1.45E-07  | 2.66012  | 1.99E-13   |
| A_52_P226407 | SMIM14                                | small integral membrane protein 14                           | -1.6841  | 0.0046292 | -1.64105 | 0.00675745 |
| A_52_P676861 | LIN28B                                | lin-28 homolog B (C. elegans)                                | -1.68396 | 8.79E-08  | -1.51771 | 3.84E-06   |
| A_52_P409746 | SERPINC1                              | serpin peptidase inhibitor, clade C (antithrombin), member 1 | -1.6822  | 0.0004396 | 3.46267  | 2.87E-10   |
| A_52_P597277 |                                       |                                                              | -1.68208 | 0.0013888 | 1.79728  | 0.00041945 |
| A_51_P513898 | EPB41L4A                              | erythrocyte membrane protein band 4.1 like 4A                | -1.68199 | 7.91E-10  | -3.89791 | 4.36E-20   |
| A_52_P266320 | Akap17b                               | A kinase (PRKA) anchor protein 17B                           | -1.68184 | 5.76E-06  | -2.04368 | 2.37E-08   |
| A_52_P850143 | 5730480H06Rik                         | RIKEN cDNA 5730480H06 gene                                   | -1.6817  | 5.61E-05  | -2.39765 | 1.09E-08   |
| A_52_P392485 | RASA2                                 | RAS p21 protein activator 2                                  | -1.68081 | 0.0006668 | 1.69409  | 0.00057146 |
| A_52_P329054 | CEP70                                 | centrosomal protein 70kDa                                    | -1.68012 | 0.0020923 | -3.848   | 1.47E-09   |
| A_51_P362638 | TF                                    | transferrin                                                  | -1.67996 | 1.24E-08  | -1.63457 | 3.55E-08   |
| A_52_P238479 | MARCH11                               | membrane-associated ring finger (C3HC4) 11                   | -1.67784 | 1.27E-09  | -2.04578 | 8.84E-13   |
| A_51_P467505 | TEC                                   | tec protein tyrosine kinase                                  | -1.67767 | 0.0009905 | 4.03109  | 1.18E-10   |
| A_52_P88983  | DOCK5                                 | dedicator of cytokinesis 5                                   | -1.67719 | 3.17E-06  | -3.14737 | 2.90E-13   |
| A_51_P286946 | LHPP                                  | phospholysine phosphohistidine inorganic pyrophosphate pl    | -1.67609 | 6.53E-08  | -3.59718 | 6.19E-17   |
| A_51_P406126 | Particl                               | promoter of Mat2a antisense radiation induced circulating l  | -1.67577 | 8.21E-06  | 2.53017  | 1.53E-10   |
| A_52_P597634 | FZD1                                  | frizzled class receptor 1                                    | -1.67522 | 0.0051008 | 7.90318  | 1.06E-12   |
| A_52_P129443 | WDPCP                                 | WD repeat containing planar cell polarity effector           | -1.67412 | 2.21E-06  | -1.85785 | 9.34E-08   |

|              |                    |                                                                |          |           |          |            |
|--------------|--------------------|----------------------------------------------------------------|----------|-----------|----------|------------|
| A_51_P138673 | HECTD3             | HECT domain containing E3 ubiquitin protein ligase 3           | -1.674   | 6.27E-07  | -4.21728 | 7.51E-17   |
| A_52_P355751 | Gm3383 (includes c | predicted gene 3383                                            | -1.67327 | 9.20E-06  | 1.69901  | 5.95E-06   |
| A_51_P464146 | SOWAHB             | sosondowah ankyrin repeat domain family member B               | -1.67231 | 0.0069589 | 10.1104  | 1.81E-13   |
| A_52_P441937 | AOC2               | amine oxidase, copper containing 2 (retina-specific)           | -1.67176 | 0.0002804 | -3.43258 | 1.05E-10   |
| A_52_P347796 | ZNF442             | zinc finger protein 442                                        | -1.67106 | 0.0041156 | -2.23702 | 3.65E-05   |
| A_52_P177599 | Zfp773             | zinc finger protein 773                                        | -1.67    | 0.0016695 | -2.13266 | 1.91E-05   |
| A_51_P343356 | Isoc2b             | isochorismatase domain containing 2b                           | -1.66866 | 0.0020695 | -1.67868 | 0.00186792 |
| A_51_P401527 | RNMTL1             | RNA methyltransferase like 1                                   | -1.66863 | 8.45E-10  | 1.84272  | 1.73E-11   |
| A_52_P63680  | ACER1              | alkaline ceramidase 1                                          | -1.66859 | 0.0002706 | -1.80804 | 4.58E-05   |
| A_52_P663440 | ASCC2              | activating signal cointegrator 1 complex subunit 2             | -1.6679  | 0.0007973 | -2.06919 | 1.08E-05   |
| A_51_P208145 | PMEL               | premelanosome protein                                          | -1.66763 | 1.53E-07  | -2.83092 | 2.94E-14   |
| A_52_P650387 | Ccnj1              | cyclin J-like                                                  | -1.66744 | 1.53E-05  | -2.52895 | 3.16E-10   |
| A_52_P134381 | PSMD12             | proteasome 26S subunit, non-ATPase 12                          | -1.66736 | 0.0023304 | -1.65711 | 0.00258468 |
| A_51_P468381 | PURB               | purine-rich element binding protein B                          | -1.66705 | 0.0056588 | 1.74606  | 0.00286103 |
| A_51_P307721 | CBLN1              | cerebellin 1 precursor                                         | -1.66678 | 2.37E-07  | -3.73484 | 1.38E-16   |
| A_52_P549418 | STXBP4             | syntaxin binding protein 4                                     | -1.66582 | 0.0036944 | -2.41213 | 7.78E-06   |
| A_52_P623809 |                    |                                                                | -1.66569 | 0.0031482 | -1.63262 | 0.00433652 |
| A_51_P515684 | 1700001L05Rik      | RIKEN cDNA 1700001L05 gene                                     | -1.66261 | 1.39E-06  | -1.96769 | 7.58E-09   |
| A_51_P309854 | Kcnn2              | potassium intermediate/small conductance calcium-activate      | -1.66011 | 1.01E-06  | -1.50757 | 2.49E-05   |
| A_52_P534203 | PIAS2              | protein inhibitor of activated STAT, 2                         | -1.65975 | 2.90E-07  | -2.0698  | 2.30E-10   |
| A_51_P402393 | KLHL8              | kelch-like family member 8                                     | -1.65891 | 1.03E-09  | 1.81903  | 2.69E-11   |
| A_51_P311904 | PTK2B              | protein tyrosine kinase 2 beta                                 | -1.65884 | 5.70E-05  | 3.0412   | 3.95E-11   |
| A_52_P334677 | CLOCK              | clock circadian regulator                                      | -1.65874 | 0.0010324 | -1.83837 | 0.0001404  |
| A_52_P577338 | LRIG2              | leucine-rich repeats and immunoglobulin-like domains 2         | -1.65809 | 0.0030484 | 1.53798  | 0.0100481  |
| A_52_P189377 | STON2              | stonin 2                                                       | -1.65695 | 5.39E-07  | -1.7506  | 8.58E-08   |
| A_52_P213220 | METTL4             | methyltransferase like 4                                       | -1.65592 | 0.0012448 | -2.33398 | 1.67E-06   |
| A_51_P284608 | CD74               | CD74 molecule, major histocompatibility complex, class II in   | -1.65549 | 1.65E-06  | -3.26945 | 2.59E-14   |
| A_51_P333923 | TSPAN1             | tetraspanin 1                                                  | -1.6554  | 0.002848  | -3.89347 | 1.43E-09   |
| A_51_P476579 |                    |                                                                | -1.65533 | 2.05E-05  | -1.55632 | 0.00011334 |
| A_51_P173114 | CDHR1              | cadherin-related family member 1                               | -1.65486 | 0.0001913 | -1.75981 | 4.59E-05   |
| A_51_P486810 | GPX2               | glutathione peroxidase 2                                       | -1.65263 | 2.33E-05  | 3.54242  | 3.53E-13   |
| A_51_P401504 | COL9A2             | collagen, type IX, alpha 2                                     | -1.65098 | 4.33E-10  | 1.69388  | 1.47E-10   |
| A_51_P174720 | CCDC43             | coiled-coil domain containing 43                               | -1.65072 | 0.0001047 | 1.51544  | 0.00083218 |
| A_51_P395856 | SLC22A7            | solute carrier family 22 (organic anion transporter), member   | -1.65072 | 1.57E-07  | 3.81082  | 3.14E-17   |
| A_51_P332917 | ENPP3              | ectonucleotide pyrophosphatase/phosphodiesterase 3             | -1.65026 | 1.22E-05  | -8.61125 | 1.29E-19   |
| A_51_P294535 | UNC5B              | unc-5 netrin receptor B                                        | -1.65005 | 0.0056486 | 1.90113  | 0.00063473 |
| A_52_P76146  | DNMT3A             | DNA (cytosine-5-)-methyltransferase 3 alpha                    | -1.64958 | 0.0042538 | -2.3794  | 9.58E-06   |
| A_52_P234039 | ZNRF3              | zinc and ring finger 3                                         | -1.64916 | 0.0005041 | -1.53555 | 0.00220097 |
| A_52_P329408 | SIPA1L1            | signal-induced proliferation-associated 1 like 1               | -1.6482  | 0.0056913 | -3.7309  | 1.35E-08   |
| A_52_P47276  | LOC102641693       | cyclin-related protein FAM58A-like                             | -1.64798 | 0.0012374 | 1.55817  | 0.00349448 |
| A_51_P116298 | SLC17A9            | solute carrier family 17 (vesicular nucleotide transporter), m | -1.64787 | 2.62E-05  | -2.04495 | 7.94E-08   |
| A_51_P259902 | ARL6IP5            | ADP-ribosylation factor-like 6 interacting protein 5           | -1.64764 | 0.0001485 | -1.67966 | 9.38E-05   |
| A_52_P61752  | TSPAN1             | tetraspanin 1                                                  | -1.64722 | 0.0004205 | -2.31573 | 2.63E-07   |
| A_51_P247157 | HN1                | hematological and neurological expressed 1                     | -1.64669 | 0.0004075 | -1.55955 | 0.001299   |
| A_51_P464387 | HSPB8              | heat shock 22kDa protein 8                                     | -1.64636 | 4.70E-09  | 2.95309  | 5.67E-17   |
| A_51_P349825 | C6orf203           | chromosome 6 open reading frame 203                            | -1.64528 | 1.28E-08  | -1.55909 | 1.12E-07   |
| A_52_P80806  | SYNCRIP            | synaptotagmin binding, cytoplasmic RNA interacting protein     | -1.64391 | 0.0001099 | -2.11252 | 2.40E-07   |
| A_52_P371154 | SGMS1              | sphingomyelin synthase 1                                       | -1.64286 | 1.69E-07  | -1.63536 | 1.99E-07   |
| A_52_P181533 | Gm3383 (includes c | predicted gene 3383                                            | -1.64241 | 0.0022072 | 1.7369   | 0.00081832 |
| A_52_P565847 | AU018091           | expressed sequence AU018091                                    | -1.64213 | 0.001975  | -1.67003 | 0.00146194 |
| A_51_P254181 | FAHD2B             | fumarylacetoacetate hydrolase domain containing 2B             | -1.64185 | 0.0043575 | -1.96466 | 0.0002292  |
| A_51_P333850 | SENPF              | SUMO1/sentrin specific peptidase 7                             | -1.64165 | 7.96E-06  | -3.20942 | 2.98E-13   |
| A_52_P519105 |                    |                                                                | -1.64164 | 0.0015453 | 2.31221  | 2.20E-06   |

|               |               |                                                               |          |           |          |            |
|---------------|---------------|---------------------------------------------------------------|----------|-----------|----------|------------|
| A_51_P346132  | Rhox6/Rhox9   | reproductive homeobox 9                                       | -1.6375  | 4.21E-06  | 4.20218  | 5.30E-16   |
| A_52_P27332   | Ppp2r5c       | protein phosphatase 2, regulatory subunit B', gamma           | -1.63732 | 3.68E-07  | -4.23974 | 9.73E-18   |
| A_52_P37774   | 4930429B21Rik | RIKEN cDNA 4930429B21 gene                                    | -1.63651 | 0.0002659 | 2.14723  | 5.22E-07   |
| A_52_P454703  | HNRNPU        | heterogeneous nuclear ribonucleoprotein U (scaffold attach    | -1.63644 | 4.29E-05  | -2.38444 | 2.78E-09   |
| A_52_P502141  | HECTD2        | HECT domain containing E3 ubiquitin protein ligase 2          | -1.63617 | 0.0024663 | 2.70988  | 2.59E-07   |
| A_52_P505143  | JRK           | Jrk helix-turn-helix protein                                  | -1.63452 | 3.67E-05  | 1.81199  | 2.24E-06   |
| A_52_P299903  | KIF5C         | kinesin family member 5C                                      | -1.63437 | 7.95E-05  | -3.39443 | 4.21E-12   |
| A_52_P295950  | IGF2BP1       | insulin-like growth factor 2 mRNA binding protein 1           | -1.63384 | 0.0001815 | -1.74779 | 3.61E-05   |
| A_51_P430033  | CCDC13        | coiled-coil domain containing 13                              | -1.63251 | 1.25E-05  | 1.97827  | 5.07E-08   |
| A_51_P318577  | SULT6B1       | sulfotransferase family, cytosolic, 6B, member 1              | -1.63229 | 0.0055586 | -3.99849 | 3.07E-09   |
| A_51_P328883  | Zfp810        | zinc finger protein 810                                       | -1.63218 | 8.57E-05  | -1.51078 | 0.00060552 |
| A_52_P472725  | PEX13         | peroxisomal biogenesis factor 13                              | -1.63199 | 0.0062442 | -1.98361 | 0.00029219 |
| A_51_P517388  | PLBD1         | phospholipase B domain containing 1                           | -1.63087 | 0.0027711 | 6.50301  | 5.05E-13   |
| A_52_P520466  | KIF18B        | kinesin family member 18B                                     | -1.63056 | 2.92E-11  | 2.63719  | 1.24E-18   |
| A_52_P241676  | SLC9A3R2      | solute carrier family 9, subfamily A (NHE3, cation proton ant | -1.63048 | 1.21E-06  | -1.61978 | 1.51E-06   |
| A_51_P488333  | A130022F02Rik | RIKEN cDNA A130022F02 gene                                    | -1.62929 | 0.0015277 | -1.58261 | 0.00262082 |
| A_52_P196388  | TMEM8A        | transmembrane protein 8A                                      | -1.62845 | 3.35E-05  | -2.82856 | 3.14E-11   |
| A_52_P420005  | WDR62         | WD repeat domain 62                                           | -1.62806 | 0.0005551 | -1.67382 | 0.00030639 |
| A_52_P249283  | Gm38685       | predicted gene, 38685                                         | -1.62754 | 0.0012628 | 1.50921  | 0.00522238 |
| A_51_P115817  | RALGPS2       | Ral GEF with PH domain and SH3 binding motif 2                | -1.62706 | 1.17E-09  | -2.29623 | 4.65E-15   |
| A_51_P318365  | IGF1R         | insulin-like growth factor 1 receptor                         | -1.62675 | 0.0002065 | -2.2336  | 1.17E-07   |
| A_52_P665326  | MED13         | mediator complex subunit 13                                   | -1.62647 | 7.74E-06  | -1.61405 | 9.79E-06   |
| A_51_P305508  | RERG          | RAS-like, estrogen-regulated, growth inhibitor                | -1.62601 | 1.93E-05  | -3.91723 | 1.76E-14   |
| A_51_P101719  | TTC14         | tetratricopeptide repeat domain 14                            | -1.62596 | 0.005974  | 1.77969  | 0.00146571 |
| A_51_P323450  | CDC42EP4      | CDC42 effector protein (Rho GTPase binding) 4                 | -1.62488 | 1.83E-06  | -1.51989 | 1.72E-05   |
| A_52_P651948  | FAM229B       | family with sequence similarity 229, member B                 | -1.62309 | 7.13E-05  | 1.90273  | 1.12E-06   |
| A_52_P488596  | AP1S2         | adaptor-related protein complex 1, sigma 2 subunit            | -1.6227  | 0.0019593 | -2.43046 | 8.95E-07   |
| A_51_P418357  | MOV10L1       | Mov10 RISC complex RNA helicase like 1                        | -1.62242 | 0.0069993 | 2.5298   | 5.66E-06   |
| A_51_P415220  | ZMAT3         | zinc finger, matrin-type 3                                    | -1.62199 | 1.79E-06  | 1.96978  | 3.68E-09   |
| A_52_P370392  | MAPK8IP2      | mitogen-activated protein kinase 8 interacting protein 2      | -1.62082 | 7.13E-08  | 1.9488   | 9.77E-11   |
| A_52_P136808  | DTYMK         | deoxythymidylate kinase (thymidylate kinase)                  | -1.62064 | 5.91E-07  | -1.61332 | 6.94E-07   |
| A_51_P517157  | TMEM43        | transmembrane protein 43                                      | -1.62027 | 4.41E-07  | 3.79351  | 5.86E-17   |
| A_52_P357611  | NEU3          | sialidase 3 (membrane sialidase)                              | -1.6194  | 0.0004316 | 4.30208  | 1.28E-12   |
| A_51_P394984  | LPIN1         | lipin 1                                                       | -1.61904 | 9.85E-06  | 5.97318  | 4.31E-18   |
| A_52_P422976  | AP2M1         | adaptor-related protein complex 2, mu 1 subunit               | -1.61895 | 0.0090141 | -2.64387 | 4.54E-06   |
| A_52_P462432  | COPG1         | coatomer protein complex, subunit gamma 1                     | -1.61797 | 0.0045465 | -2.21569 | 2.11E-05   |
| A_51_P213666  | PSMA8         | proteasome subunit alpha 8                                    | -1.61634 | 2.62E-05  | -1.93822 | 1.60E-07   |
| A_51_P413122  | STRADA        | STE20-related kinase adaptor alpha                            | -1.61623 | 1.62E-09  | -1.51019 | 3.38E-08   |
| A_52_P1114640 | 2410003L11Rik | RIKEN cDNA 2410003L11 gene                                    | -1.61601 | 0.0010484 | -3.99153 | 2.95E-11   |
| A_51_P268234  | IL34          | interleukin 34                                                | -1.61576 | 0.0004386 | 3.77233  | 1.07E-11   |
| A_51_P338615  | ADPRH         | ADP-ribosylarginine hydrolase                                 | -1.61507 | 1.02E-05  | 1.73612  | 1.14E-06   |
| A_52_P412037  |               |                                                               | -1.61429 | 0.0065612 | 2.09267  | 0.00010049 |
| A_51_P196687  | IFNGR2        | interferon gamma receptor 2 (interferon gamma transducer      | -1.61229 | 0.0002139 | -2.91904 | 2.74E-10   |
| A_51_P289742  | SLC27A5       | solute carrier family 27 (fatty acid transporter), member 5   | -1.61228 | 3.14E-05  | -2.09382 | 2.38E-08   |
| A_51_P372826  | SMOX          | spermine oxidase                                              | -1.61161 | 3.11E-08  | 2.07657  | 3.48E-12   |
| A_52_P85983   | MRPL45        | mitochondrial ribosomal protein L45                           | -1.61101 | 0.0001068 | -1.74848 | 1.29E-05   |
| A_52_P715388  |               |                                                               | -1.60996 | 0.0042876 | 1.5868   | 0.00542721 |
| A_52_P276537  | RALGPS2       | Ral GEF with PH domain and SH3 binding motif 2                | -1.60995 | 0.0002794 | -2.3678  | 3.48E-08   |
| A_52_P126045  | PHTF2         | putative homeodomain transcription factor 2                   | -1.60929 | 4.13E-06  | -1.72459 | 4.48E-07   |
| A_51_P123345  | Arf2          | ADP-ribosylation factor 2                                     | -1.60912 | 0.0046839 | 3.80322  | 2.24E-09   |
| A_51_P292582  | ELOVL2        | ELOVL fatty acid elongase 2                                   | -1.60806 | 0.0005746 | 3.13408  | 4.27E-10   |
| A_52_P599549  | RRAGB         | Ras-related GTP binding B                                     | -1.60522 | 0.0001488 | -1.70112 | 3.43E-05   |
| A_51_P216595  | USP28         | ubiquitin specific peptidase 28                               | -1.60499 | 7.36E-06  | -2.88439 | 8.57E-13   |

|              |               |                                                             |          |           |          |            |
|--------------|---------------|-------------------------------------------------------------|----------|-----------|----------|------------|
| A_52_P321325 | ZHX3          | zinc fingers and homeoboxes 3                               | -1.60377 | 0.0042063 | 3.12442  | 3.47E-08   |
| A_51_P398191 | AUTS2         | autism susceptibility candidate 2                           | -1.60311 | 1.86E-05  | -2.2164  | 1.99E-09   |
| A_52_P420734 | RASGRP2       | RAS guanyl releasing protein 2 (calcium and DAG-regulated)  | -1.60303 | 0.0004333 | -1.67683 | 0.00015516 |
| A_52_P576041 | RGL1          | ral guanine nucleotide dissociation stimulator-like 1       | -1.60275 | 1.02E-05  | 2.16793  | 1.50E-09   |
| A_52_P574190 | PSMD12        | proteasome 26S subunit, non-ATPase 12                       | -1.60262 | 1.32E-12  | -1.67365 | 1.61E-13   |
| A_51_P245368 | Abcb1b        | ATP-binding cassette, sub-family B (MDR/TAP), member 1B     | -1.60244 | 0.0004827 | 7.9042   | 1.73E-16   |
| A_51_P465445 | MAP4          | microtubule-associated protein 4                            | -1.60184 | 1.57E-05  | -1.71939 | 1.88E-06   |
| A_51_P394354 | FAM213A       | family with sequence similarity 213, member A               | -1.60162 | 0.0001473 | 2.05794  | 2.67E-07   |
| A_51_P429472 | FAM188A       | family with sequence similarity 188, member A               | -1.60144 | 4.38E-07  | -2.62097 | 1.11E-13   |
| A_52_P241519 | MYO1C         | myosin 1C                                                   | -1.60077 | 0.000373  | -2.82802 | 1.08E-09   |
| A_51_P520310 | ALOX12        | arachidonate 12-lipoxygenase                                | -1.60062 | 0.0008116 | 2.03053  | 4.70E-06   |
| A_52_P640694 | RIMS3         | regulating synaptic membrane exocytosis 3                   | -1.60039 | 6.39E-05  | -5.40652 | 3.45E-16   |
| A_52_P483105 | LPIN1         | lipin 1                                                     | -1.59971 | 3.23E-06  | 6.87583  | 4.25E-20   |
| A_52_P143477 | Tgoln1        | trans-golgi network protein                                 | -1.59929 | 7.13E-05  | 1.59376  | 7.83E-05   |
| A_52_P560728 | SERHL2        | serine hydrolase-like 2                                     | -1.59848 | 7.09E-09  | -2.48209 | 1.76E-15   |
| A_52_P233801 | DYSF          | dysferlin                                                   | -1.59805 | 0.0019388 | -2.23688 | 2.57E-06   |
| A_52_P421220 | DZIP1         | DAZ interacting zinc finger protein 1                       | -1.59709 | 0.0002455 | 2.87865  | 3.06E-10   |
| A_52_P274028 | SSR1          | signal sequence receptor, alpha                             | -1.59574 | 0.0012031 | -1.5628  | 0.00182921 |
| A_52_P716154 | EARS2         | glutamyl-tRNA synthetase 2, mitochondrial                   | -1.59541 | 5.76E-05  | -3.55848 | 2.86E-13   |
| A_52_P663149 | UTP18         | UTP18 small subunit (SSU) processome component homolog      | -1.59324 | 0.0003482 | -2.05509 | 8.32E-07   |
| A_52_P116704 | SLC25A39      | solute carrier family 25, member 39                         | -1.59006 | 0.0001641 | -1.57569 | 0.00020671 |
| A_52_P324866 | ARNT          | aryl hydrocarbon receptor nuclear translocator              | -1.58729 | 0.0005231 | -1.79851 | 2.95E-05   |
| A_52_P568781 | SEC63         | SEC63 homolog, protein translocation regulator              | -1.58685 | 0.0002106 | -1.97232 | 9.10E-07   |
| A_52_P589509 | SCAPER        | S-phase cyclin A-associated protein in the ER               | -1.58631 | 1.91E-09  | -2.04622 | 8.92E-14   |
| A_52_P401795 | Btn1          | butyrophilin-like 1                                         | -1.58607 | 0.0005962 | -1.52854 | 0.00135109 |
| A_51_P483473 | ST3GAL5       | ST3 beta-galactoside alpha-2,3-sialyltransferase 5          | -1.58572 | 1.60E-06  | 1.74828  | 5.56E-08   |
| A_52_P653367 | SLC26A2       | solute carrier family 26 (anion exchanger), member 2        | -1.58497 | 7.27E-06  | 2.24974  | 2.03E-10   |
| A_52_P621109 |               |                                                             | -1.58403 | 7.51E-07  | 2.13278  | 3.79E-11   |
| A_52_P561260 | C20orf194     | chromosome 20 open reading frame 194                        | -1.58312 | 0.0035234 | 1.82221  | 0.00027167 |
| A_52_P34031  | 1700019G17Rik | RIKEN cDNA 1700019G17 gene                                  | -1.58273 | 0.0073375 | 1.91853  | 0.0003187  |
| A_52_P170339 | NF2           | neurofibromin 2 (merlin)                                    | -1.58136 | 3.35E-08  | -1.89435 | 3.27E-11   |
| A_51_P240986 | PLEKHG6       | pleckstrin homology domain containing, family G (with RhoC) | -1.58104 | 1.34E-07  | 2.42911  | 8.20E-14   |
| A_51_P106059 | TRAF4         | TNF receptor-associated factor 4                            | -1.58092 | 1.00E-06  | 2.94051  | 1.16E-14   |
| A_52_P639025 | TMEM57        | transmembrane protein 57                                    | -1.58081 | 0.0014915 | -1.85543 | 5.45E-05   |
| A_51_P479177 | NOSIP         | nitric oxide synthase interacting protein                   | -1.5807  | 1.34E-07  | -2.88839 | 9.50E-16   |
| A_51_P144957 | TRAM11L1      | translocation associated membrane protein 1-like 1          | -1.58055 | 0.0088787 | 19.0003  | 5.53E-17   |
| A_52_P226127 | DIDO1         | death inducer-obliterator 1                                 | -1.57899 | 2.07E-06  | 2.66321  | 3.40E-13   |
| A_51_P262515 | PHF11         | PHD finger protein 11                                       | -1.57888 | 4.50E-09  | -1.99465 | 4.59E-13   |
| A_52_P154971 | SLC27A2       | solute carrier family 27 (fatty acid transporter), member 2 | -1.57793 | 4.34E-06  | -6.08756 | 1.82E-19   |
| A_52_P488305 | NDEL1         | nudE neurodevelopment protein 1-like 1                      | -1.5779  | 0.0017455 | 2.038    | 9.24E-06   |
| A_52_P348704 | DNAJB5        | DnaJ (Hsp40) homolog, subfamily B, member 5                 | -1.57767 | 1.27E-05  | 2.68863  | 4.35E-12   |
| A_51_P430055 | TSPAN7        | tetraspanin 7                                               | -1.57759 | 1.29E-05  | 2.24738  | 3.91E-10   |
| A_51_P336114 | WDR62         | WD repeat domain 62                                         | -1.57727 | 2.12E-07  | -1.80079 | 1.52E-09   |
| A_52_P483101 | LPIN1         | lipin 1                                                     | -1.57596 | 0.0001118 | 6.03179  | 9.22E-17   |
| A_51_P462516 | SENP7         | SUMO1/sentrin specific peptidase 7                          | -1.57583 | 0.0004408 | -3.17126 | 7.63E-11   |
| A_51_P480861 | Pga5          | pepsinogen 5, group I                                       | -1.572   | 0.0052876 | 1.80236  | 0.00049515 |
| A_51_P207591 | ANXA8/ANXA8L1 | annexin A8-like 1                                           | -1.57192 | 3.68E-07  | 50.8329  | 1.40E-30   |
| A_51_P178592 | MRPL1         | mitochondrial ribosomal protein L1                          | -1.57142 | 0.0057991 | -2.07738 | 4.39E-05   |
| A_51_P444994 | TMEM203       | transmembrane protein 203                                   | -1.57011 | 0.0052095 | 4.58928  | 5.75E-11   |
| A_52_P438084 | PRKCZ         | protein kinase C, zeta                                      | -1.56935 | 4.51E-06  | -2.32398 | 2.60E-11   |
| A_52_P578268 | SEC63         | SEC63 homolog, protein translocation regulator              | -1.56922 | 3.43E-05  | -1.66226 | 6.16E-06   |
| A_52_P201655 | STRADA        | STE20-related kinase adaptor alpha                          | -1.5688  | 0.0010536 | -1.77051 | 7.51E-05   |
| A_52_P300500 | GPHN          | gephyrin                                                    | -1.56786 | 0.0043799 | 3.39548  | 3.65E-09   |

|               |                 |                                                              |          |           |          |            |
|---------------|-----------------|--------------------------------------------------------------|----------|-----------|----------|------------|
| A_52_P213550  | CHRNA5          | cholinergic receptor, nicotinic, alpha 5 (neuronal)          | -1.56608 | 0.0001689 | -2.14284 | 5.03E-08   |
| A_52_P590396  | SORT1           | sortilin 1                                                   | -1.56571 | 0.000775  | -2.98519 | 5.90E-10   |
| A_51_P149503  | DIRAS1          | DIRAS family, GTP-binding RAS-like 1                         | -1.56482 | 3.06E-06  | -1.76075 | 5.42E-08   |
| A_52_P116204  | CADM1           | cell adhesion molecule 1                                     | -1.5639  | 3.58E-06  | 1.93327  | 3.21E-09   |
| A_52_P290221  | ZNF182          | zinc finger protein 182                                      | -1.56347 | 0.002664  | -1.95886 | 3.10E-05   |
| A_51_P306689  | RCOR2           | REST corepressor 2                                           | -1.56103 | 1.05E-05  | -2.81155 | 6.41E-13   |
| A_51_P142923  | CHKA            | choline kinase alpha                                         | -1.56049 | 9.05E-07  | -1.59372 | 4.12E-07   |
| A_51_P474538  | IGF1R           | insulin-like growth factor 1 receptor                        | -1.55866 | 0.0038479 | -3.61695 | 6.91E-10   |
| A_51_P429295  | PUS10           | pseudouridylate synthase 10                                  | -1.55682 | 6.35E-09  | -1.73015 | 6.87E-11   |
| A_51_P342259  | TMEM57          | transmembrane protein 57                                     | -1.55678 | 0.0017705 | -1.57018 | 0.00148791 |
| A_51_P320668  | ACTR3B          | ARP3 actin-related protein 3 homolog B (yeast)               | -1.55639 | 1.51E-10  | -1.50588 | 8.02E-10   |
| A_52_P23413   | SGK223          | homolog of rat pragma of Rnd2                                | -1.55361 | 0.0068131 | -2.00352 | 8.09E-05   |
| A_52_P1180449 | RTN4            | reticulon 4                                                  | -1.55319 | 0.0047943 | -1.9859  | 5.15E-05   |
| A_51_P100174  | MNS1            | meiosis-specific nuclear structural 1                        | -1.55297 | 2.40E-08  | -1.68993 | 6.86E-10   |
| A_51_P361099  | ADSS            | adenylosuccinate synthase                                    | -1.55294 | 0.0005448 | -1.83439 | 9.83E-06   |
| A_51_P470935  | BDH2            | 3-hydroxybutyrate dehydrogenase, type 2                      | -1.55294 | 0.0060902 | -7.42328 | 8.59E-14   |
| A_51_P303095  | TTC28           | tetratricopeptide repeat domain 28                           | -1.5529  | 0.0013954 | 2.06358  | 2.83E-06   |
| A_51_P234853  | SDHB            | succinate dehydrogenase complex, subunit B, iron sulfur (lp) | -1.55279 | 0.0010207 | -2.08094 | 1.38E-06   |
| A_51_P144438  | ZNFX1           | zinc finger, NFX1-type containing 1                          | -1.55249 | 0.0004166 | -1.54193 | 0.00049201 |
| A_51_P518926  | BORCS6          | BLOC-1 related complex subunit 6                             | -1.55197 | 0.0007592 | 1.5971   | 0.00039338 |
| A_51_P209914  | RPGR            | retinitis pigmentosa GTPase regulator                        | -1.5518  | 0.0005247 | -1.60306 | 0.00024088 |
| A_52_P513041  | FRY             | furry homolog (Drosophila)                                   | -1.55155 | 0.0002784 | -2.31909 | 1.16E-08   |
| A_52_P595908  | RNF138          | ring finger protein 138, E3 ubiquitin protein ligase         | -1.55129 | 0.0004389 | -1.68799 | 5.49E-05   |
| A_51_P432724  | WDR31           | WD repeat domain 31                                          | -1.55086 | 0.0001076 | -3.39339 | 5.24E-13   |
| A_51_P313444  | FKBP6           | FK506 binding protein 6, 36kDa                               | -1.54981 | 0.0002042 | 3.10109  | 1.07E-11   |
| A_52_P479001  | DDX58           | DEAD (Asp-Glu-Ala-Asp) box polypeptide 58                    | -1.54911 | 0.0055607 | -3.19411 | 1.11E-08   |
| A_51_P432420  | CEP131          | centrosomal protein 131kDa                                   | -1.54828 | 1.43E-05  | -2.80085 | 7.54E-13   |
| A_52_P533779  | ANKRD40         | ankyrin repeat domain 40                                     | -1.54748 | 4.29E-08  | 1.98781  | 2.73E-12   |
| A_52_P313933  | 1700057H21Rik   | RIKEN cDNA 1700057H21 gene                                   | -1.54691 | 0.0040561 | -15.2981 | 7.13E-18   |
| A_52_P483104  | LPIN1           | lipin 1                                                      | -1.54618 | 9.00E-05  | 7.85848  | 5.24E-19   |
| A_51_P153973  | ZNF676          | zinc finger protein 676                                      | -1.54533 | 0.0002407 | -1.6996  | 1.96E-05   |
| A_52_P67088   | NME4            | NME/NM23 nucleoside diphosphate kinase 4                     | -1.54514 | 2.69E-08  | 1.55183  | 2.22E-08   |
| A_51_P510567  | ZFYVE28         | zinc finger, FYVE domain containing 28                       | -1.54422 | 0.0009117 | -2.64188 | 5.05E-09   |
| A_51_P502107  | SBNO1           | strawberry notch homolog 1 (Drosophila)                      | -1.5441  | 2.25E-07  | -2.34237 | 1.26E-13   |
| A_51_P220262  | RNF165          | ring finger protein 165                                      | -1.54395 | 0.0008556 | -4.71273 | 1.21E-13   |
| A_52_P573377  | SMS             | spermine synthase                                            | -1.54369 | 0.0008412 | -1.80309 | 2.25E-05   |
| A_51_P511315  | PSTPIP1         | proline-serine-threonine phosphatase interacting protein 1   | -1.54361 | 6.62E-06  | 1.6204   | 1.25E-06   |
| A_51_P302358  | LTB             | lymphotoxin beta (TNF superfamily, member 3)                 | -1.54296 | 9.13E-07  | -8.98327 | 1.78E-23   |
| A_51_P359454  | C6orf89         | chromosome 6 open reading frame 89                           | -1.53904 | 1.46E-07  | 1.59071  | 3.73E-08   |
| A_51_P152336  | USP49           | ubiquitin specific peptidase 49                              | -1.5389  | 0.0047979 | -1.64503 | 0.00142992 |
| A_52_P91152   | SEMA3E          | sema domain, immunoglobulin domain (lg), short basic dom     | -1.53873 | 0.0076726 | -1.61161 | 0.00356839 |
| A_51_P468055  | SMYD1           | SET and MYND domain containing 1                             | -1.53854 | 0.0004696 | -1.61806 | 0.00013453 |
| A_52_P401614  | D930048N14Rik   | RIKEN cDNA D930048N14 gene                                   | -1.53831 | 0.0014745 | -3.07044 | 6.10E-10   |
| A_52_P245059  | SGSM2           | small G protein signaling modulator 2                        | -1.53819 | 6.15E-07  | 1.72552  | 7.73E-09   |
| A_51_P419169  | SUV39H2         | suppressor of variegation 3-9 homolog 2 (Drosophila)         | -1.53815 | 5.25E-07  | -1.50402 | 1.29E-06   |
| A_52_P439263  | UGT8            | UDP glycosyltransferase 8                                    | -1.5381  | 0.0018405 | 1.79485  | 6.76E-05   |
| A_51_P444666  | TMEM106A        | transmembrane protein 106A                                   | -1.53722 | 8.38E-05  | -3.76139 | 2.74E-14   |
| A_51_P230347  | Srsf12          | serine/arginine-rich splicing factor 12                      | -1.53626 | 0.0022584 | 5.75106  | 6.22E-14   |
| A_51_P417077  | VILL            | villin-like                                                  | -1.53563 | 0.0033423 | -1.60714 | 0.00139224 |
| A_51_P341255  | AI842136        | expressed sequence AI842136                                  | -1.53513 | 0.0002017 | -2.36112 | 2.62E-09   |
| A_52_P649786  | ASB3/GPR75-ASB3 | ankyrin repeat and SOCS box containing 3                     | -1.5343  | 0.0086749 | 3.17246  | 2.72E-08   |
| A_51_P376857  | DET1            | de-etiolated homolog 1 (Arabidopsis)                         | -1.53429 | 9.24E-08  | 1.65933  | 3.55E-09   |
| A_51_P308681  | MCUR1           | mitochondrial calcium uniporter regulator 1                  | -1.53338 | 3.76E-06  | -2.3891  | 2.80E-12   |



|               |               |                                                                |          |           |          |            |
|---------------|---------------|----------------------------------------------------------------|----------|-----------|----------|------------|
| A_52_P312473  | 9230114K14Rik | RIKEN cDNA 9230114K14 gene                                     | -1.53172 | 0.0010851 | 2.99236  | 4.02E-10   |
| A_51_P450248  | Esx1          | extraembryonic, spermatogenesis, homeobox 1                    | -1.53078 | 0.0074778 | -2.62648 | 4.34E-07   |
| A_52_P682099  | FAM149B1      | family with sequence similarity 149, member B1                 | -1.53072 | 0.0010577 | -1.52485 | 0.00115326 |
| A_52_P182298  | RLN1          | relaxin 1                                                      | -1.52975 | 0.0036628 | 21.7314  | 1.05E-19   |
| A_51_P120948  | CUL4B         | cullin 4B                                                      | -1.52951 | 4.19E-05  | -1.66044 | 3.26E-06   |
| A_51_P246345  | MYL7          | myosin, light chain 7, regulatory                              | -1.52951 | 0.0020776 | -3.7936  | 2.37E-11   |
| A_51_P489779  | CDK6          | cyclin-dependent kinase 6                                      | -1.52937 | 0.0005386 | -2.13224 | 1.43E-07   |
| A_51_P114287  | CPSF6         | cleavage and polyadenylation specific factor 6, 68kDa          | -1.52771 | 4.90E-06  | -2.76032 | 8.77E-14   |
| A_52_P59801   | FRY           | furry homolog (Drosophila)                                     | -1.5257  | 0.0045664 | -3.45988 | 8.13E-10   |
| A_51_P276063  | PHYH          | phytanoyl-CoA 2-hydroxylase                                    | -1.52545 | 3.34E-05  | -1.70421 | 9.99E-07   |
| A_51_P329928  | PHLDA3        | pleckstrin homology-like domain, family A, member 3            | -1.5246  | 3.82E-06  | 5.51515  | 8.12E-20   |
| A_51_P337089  | GIN51         | GIN5 complex subunit 1 (Psf1 homolog)                          | -1.52362 | 5.13E-05  | -1.55984 | 2.48E-05   |
| A_52_P6404    | BPTF          | bromodomain PHD finger transcription factor                    | -1.52326 | 0.0076663 | -3.3108  | 6.75E-09   |
| A_52_P617817  | HSPA4         | heat shock 70kDa protein 4                                     | -1.52246 | 0.0006172 | -1.52221 | 0.00061966 |
| A_52_P1053544 |               |                                                                | -1.52208 | 0.0055489 | -2.29559 | 2.13E-06   |
| A_51_P191046  | Platr10       | pluripotency associated transcript 10                          | -1.51971 | 6.13E-07  | -1.98609 | 3.19E-11   |
| A_52_P81231   | ACPP          | acid phosphatase, prostate                                     | -1.5194  | 0.0074787 | 4.48333  | 4.56E-11   |
| A_52_P433817  | GAB3          | GRB2-associated binding protein 3                              | -1.51907 | 0.0067103 | -1.70068 | 0.00088874 |
| A_52_P652671  | HPS1          | Hermansky-Pudlak syndrome 1                                    | -1.51825 | 0.0062574 | -2.08986 | 1.53E-05   |
| A_51_P250459  | METTL5        | methyltransferase like 5                                       | -1.51813 | 0.0052464 | -4.1257  | 5.24E-11   |
| A_51_P262533  | CXXC1         | CXXC finger protein 1                                          | -1.51807 | 0.000202  | -1.74223 | 4.33E-06   |
| A_51_P112223  | Gsta4         | glutathione S-transferase, alpha 4                             | -1.51792 | 1.64E-08  | -3.25036 | 3.03E-19   |
| A_51_P341369  | PQLC1         | PQ loop repeat containing 1                                    | -1.51768 | 6.28E-06  | 1.95139  | 1.22E-09   |
| A_51_P130409  | PPP1R13B      | protein phosphatase 1, regulatory subunit 13B                  | -1.51711 | 0.0003486 | 2.64254  | 3.03E-10   |
| A_52_P222135  | LRCH1         | leucine-rich repeats and calponin homology (CH) domain coi     | -1.51704 | 0.0005295 | -1.63213 | 8.27E-05   |
| A_52_P403443  | TNS3          | tensin 3                                                       | -1.51544 | 1.92E-05  | -1.71257 | 3.29E-07   |
| A_52_P385801  | SPOCK2        | sparc/osteonectin, cwcv and kazal-like domains proteoglyca     | -1.51436 | 0.0006748 | -1.98458 | 7.91E-07   |
| A_51_P229325  | SMYD3         | SET and MYND domain containing 3                               | -1.51414 | 1.48E-06  | -1.76186 | 4.98E-09   |
| A_52_P390448  |               |                                                                | -1.51385 | 0.0001039 | -1.52838 | 7.82E-05   |
| A_51_P230267  | HLA-A         | major histocompatibility complex, class I, A                   | -1.51371 | 0.0007328 | -3.43397 | 6.28E-12   |
| A_52_P402960  | PTPN4         | protein tyrosine phosphatase, non-receptor type 4 (megaka      | -1.51305 | 0.0005303 | -1.85492 | 2.83E-06   |
| A_51_P153977  | ZNF676        | zinc finger protein 676                                        | -1.51287 | 0.0013513 | -1.83116 | 1.60E-05   |
| A_51_P348652  | SPAST         | spastin                                                        | -1.51208 | 1.18E-05  | -3.17429 | 8.55E-15   |
| A_52_P338951  | D630045M09Rik | RIKEN cDNA D630045M09 gene                                     | -1.51124 | 8.92E-05  | 2.27048  | 7.75E-10   |
| A_52_P420045  | CHKA          | choline kinase alpha                                           | -1.51023 | 7.34E-05  | -2.43284 | 9.33E-11   |
| A_52_P508317  | ERLEC1        | endoplasmic reticulum lectin 1                                 | -1.51    | 0.0031701 | -1.80661 | 7.56E-05   |
| A_52_P307961  | ABCA5         | ATP-binding cassette, sub-family A (ABC1), member 5            | -1.50999 | 0.0005758 | 1.54153  | 0.00034178 |
| A_52_P557129  | SLC12A5       | solute carrier family 12 (potassium/chloride transporter), m   | -1.50991 | 0.0016971 | 2.52543  | 1.68E-08   |
| A_52_P470046  | CYFIP2        | cytoplasmic FMR1 interacting protein 2                         | -1.50968 | 0.0001848 | 3.92729  | 2.16E-14   |
| A_51_P151756  | UTP6          | UTP6, small subunit (SSU) processome component, homolog        | -1.5095  | 0.0049866 | -1.53993 | 0.00344178 |
| A_52_P590756  | SLC25A35      | solute carrier family 25, member 35                            | -1.50812 | 0.0035716 | -3.41868 | 2.83E-10   |
| A_51_P269546  | TREM2         | triggering receptor expressed on myeloid cells 2               | -1.50681 | 0.0079176 | -4.38477 | 4.87E-11   |
| A_52_P391058  | Zfp952        | zinc finger protein 952                                        | -1.50582 | 0.0009914 | 1.61272  | 0.00019056 |
| A_52_P290202  | BAIAP2        | BAI1-associated protein 2                                      | -1.50412 | 0.0039078 | 2.39948  | 2.53E-07   |
| A_52_P125354  | SLC2A8        | solute carrier family 2 (facilitated glucose transporter), mem | -1.50382 | 0.0053222 | -1.63425 | 0.00109956 |
| A_52_P498241  | CDKN2B        | cyclin-dependent kinase inhibitor 2B (p15, inhibits CDK4)      | -1.50346 | 2.24E-05  | 6.31902  | 1.05E-19   |
| A_52_P497208  | CAMKV         | CaM kinase-like vesicle-associated                             | -1.50324 | 3.58E-05  | -5.11658 | 6.43E-18   |
| A_52_P299684  | ZDHHC9        | zinc finger, DHHC-type containing 9                            | -1.50315 | 0.0001219 | -1.64035 | 8.97E-06   |
| A_51_P116609  | TEX12         | testis expressed 12                                            | -1.50302 | 0.0009401 | 2.26188  | 4.58E-08   |
| A_51_P162671  | FOLR2         | folate receptor 2 (fetal)                                      | -1.50172 | 0.0010191 | 4.08387  | 3.95E-13   |
| A_52_P18577   | CCDC138       | coiled-coil domain containing 138                              | 1.5001   | 0.0014628 | -2.30341 | 6.64E-08   |
| A_52_P135175  | TMEM128       | transmembrane protein 128                                      | 1.50025  | 5.11E-07  | 1.66371  | 7.51E-09   |
| A_51_P190254  | SCRN1         | secernin 1                                                     | 1.50033  | 7.40E-05  | 3.30205  | 6.55E-14   |

|              |                |                                                              |         |           |          |            |
|--------------|----------------|--------------------------------------------------------------|---------|-----------|----------|------------|
| A_52_P76216  | GAREM          | GRB2 associated, regulator of MAPK1                          | 1.50098 | 1.84E-05  | -2.16204 | 1.57E-10   |
| A_52_P378765 | PRIMPOL        | primase and polymerase (DNA-directed)                        | 1.50141 | 0.0009261 | -1.52355 | 0.00065034 |
| A_51_P493627 | TBC1D2B        | TBC1 domain family, member 2B                                | 1.50205 | 0.0034538 | 1.78116  | 9.94E-05   |
| A_51_P186487 | PIK3C2B        | phosphatidylinositol-4-phosphate 3-kinase, catalytic subunit | 1.50244 | 4.21E-05  | 1.95972  | 1.01E-08   |
| A_51_P165342 | ANXA2          | annexin A2                                                   | 1.50275 | 0.0008076 | -3.14106 | 2.90E-11   |
| A_51_P199968 | FRMD6          | FERM domain containing 6                                     | 1.50279 | 7.55E-06  | 2.3456   | 4.35E-12   |
| A_52_P430179 | Plekha6        | pleckstrin homology domain containing, family A member 6     | 1.50308 | 6.81E-06  | 3.79424  | 5.92E-17   |
| A_51_P268734 | KPTN           | kaptin (actin binding protein)                               | 1.50347 | 0.0013199 | -1.67842 | 9.98E-05   |
| A_51_P311048 | TGFBRAP1       | transforming growth factor, beta receptor associated protei  | 1.50369 | 0.0002142 | 1.56081  | 7.45E-05   |
| A_51_P495049 | CKMT1A/CKMT1B  | creatine kinase, mitochondrial 1B                            | 1.50372 | 2.29E-07  | 4.61736  | 6.80E-21   |
| A_51_P440790 | DPP7           | dipeptidyl-peptidase 7                                       | 1.504   | 1.70E-06  | 1.54953  | 5.25E-07   |
| A_52_P110257 | WDR83          | WD repeat domain 83                                          | 1.50452 | 0.0002169 | -1.62838 | 2.30E-05   |
| A_51_P191393 | POM121/POM121C | POM121 transmembrane nucleoporin                             | 1.50504 | 0.0069591 | 1.89992  | 8.90E-05   |
| A_51_P453088 | Coa6           | cytochrome c oxidase assembly factor 6                       | 1.5065  | 0.0050572 | 1.58744  | 0.00188594 |
| A_51_P380581 | FUBP1          | far upstream element (FUSE) binding protein 1                | 1.50667 | 0.0008078 | -1.77098 | 1.46E-05   |
| A_52_P530979 | HBS1L          | HBS1-like translational GTPase                               | 1.50745 | 0.0014261 | -1.85344 | 1.16E-05   |
| A_52_P91978  | LMBRD2         | LMBR1 domain containing 2                                    | 1.50753 | 0.0012372 | 1.56676  | 0.00050658 |
| A_51_P211131 | TRAF3IP2       | TRAF3 interacting protein 2                                  | 1.50898 | 4.95E-08  | 3.22353  | 1.15E-18   |
| A_51_P138879 | ZGPAT          | zinc finger, CCCH-type with G patch domain                   | 1.5096  | 1.43E-09  | 2.66315  | 1.16E-18   |
| A_51_P450561 | TEF            | thyrotrophic embryonic factor                                | 1.50975 | 6.44E-05  | 5.6622   | 5.66E-18   |
| A_52_P139740 | MDP1           | magnesium-dependent phosphatase 1                            | 1.51149 | 0.0016086 | 2.64561  | 5.95E-09   |
| A_51_P229886 | FPGT           | fucose-1-phosphate guanylyltransferase                       | 1.51177 | 0.0001109 | 2.00166  | 3.23E-08   |
| A_51_P234539 | NFXL1          | nuclear transcription factor, X-box binding-like 1           | 1.51289 | 3.97E-05  | -1.5007  | 5.15E-05   |
| A_51_P293127 | ZBTB5          | zinc finger and BTB domain containing 5                      | 1.5134  | 0.0014744 | 2.59248  | 7.97E-09   |
| A_51_P382925 | FADD           | Fas (TNFRSF6)-associated via death domain                    | 1.51346 | 4.94E-08  | 1.90712  | 4.10E-12   |
| A_51_P474158 | NOP16          | NOP16 nucleolar protein                                      | 1.51368 | 9.62E-05  | 1.95503  | 5.29E-08   |
| A_52_P159951 | ZNF777         | zinc finger protein 777                                      | 1.51385 | 0.0085256 | 2.308    | 4.03E-06   |
| A_52_P310530 | RBFOX2         | RNA binding protein, fox-1 homolog (C. elegans) 2            | 1.51463 | 0.000141  | 1.88452  | 2.68E-07   |
| A_51_P326242 | NT5DC1         | 5'-nucleotidase domain containing 1                          | 1.51464 | 8.50E-06  | -1.58256 | 1.80E-06   |
| A_52_P446011 | ETNK1          | ethanolamine kinase 1                                        | 1.51497 | 0.0068277 | 1.58784  | 0.00299137 |
| A_51_P179498 | FAM92A1        | family with sequence similarity 92, member A1                | 1.51582 | 6.68E-06  | -1.6109  | 7.58E-07   |
| A_51_P135340 | PANX1          | pannexin 1                                                   | 1.51621 | 0.0002673 | 1.6265   | 3.94E-05   |
| A_52_P483768 | DCUN1D4        | DCN1, defective in cullin neddylation 1, domain containing 4 | 1.51631 | 1.25E-05  | -2.74859 | 2.91E-13   |
| A_51_P227090 | RAMP3          | receptor (G protein-coupled) activity modifying protein 3    | 1.51712 | 2.01E-10  | 1.62774  | 6.03E-12   |
| A_52_P516059 | TIA1           | TIA1 cytotoxic granule-associated RNA binding protein        | 1.51763 | 0.0005857 | -2.26075 | 2.96E-08   |
| A_51_P220813 | GNG2           | guanine nucleotide binding protein (G protein), gamma 2      | 1.51771 | 0.0054939 | -1.76343 | 0.00032889 |
| A_52_P489240 | REXO2          | RNA exonuclease 2                                            | 1.51793 | 0.0064457 | 3.49536  | 1.40E-09   |
| A_51_P159113 | HR             | hair growth associated                                       | 1.51806 | 0.0007941 | 2.04672  | 5.45E-07   |
| A_51_P494825 | MFHAS1         | malignant fibrous histiocytoma amplified sequence 1          | 1.51809 | 0.0002504 | 2.12137  | 3.16E-08   |
| A_52_P464315 | CTSA           | cathepsin A                                                  | 1.51852 | 1.28E-05  | 1.51121  | 1.51E-05   |
| A_52_P381303 | GINS2          | GINS complex subunit 2 (Psf2 homolog)                        | 1.51866 | 0.002178  | -1.99709 | 5.59E-06   |
| A_52_P217986 | ACAP2          | ArfGAP with coiled-coil, ankyrin repeat and PH domains 2     | 1.51919 | 0.0021016 | 1.75501  | 9.27E-05   |
| A_51_P469261 |                |                                                              | 1.51936 | 8.36E-05  | -1.72281 | 1.95E-06   |
| A_51_P310676 | GALR2          | galanin receptor 2                                           | 1.5196  | 0.0089114 | 1.81345  | 0.00042151 |
| A_52_P253167 | TOR1AIP2       | torsin A interacting protein 2                               | 1.52042 | 2.34E-08  | 1.66524  | 4.26E-10   |
| A_51_P191331 | SIPA1          | signal-induced proliferation-associated 1                    | 1.52045 | 2.44E-06  | -2.11117 | 3.17E-11   |
| A_52_P306065 | NUAK1          | NUAK family, SNF1-like kinase, 1                             | 1.52065 | 0.0004579 | -2.1567  | 6.38E-08   |
| A_52_P346581 | COLGALT1       | collagen beta(1-O)galactosyltransferase 1                    | 1.5207  | 3.07E-05  | 2.23235  | 2.89E-10   |
| A_52_P206925 | PARP16         | poly (ADP-ribose) polymerase family, member 16               | 1.5213  | 2.01E-06  | -3.49957 | 8.28E-17   |
| A_52_P90747  | PTPRS          | protein tyrosine phosphatase, receptor type, S               | 1.52132 | 3.23E-05  | 2.0276   | 4.62E-09   |
| A_51_P400166 | TREX1          | three prime repair exonuclease 1                             | 1.52153 | 0.0005498 | 2.70511  | 5.28E-10   |
| A_52_P422675 | HOOK3          | hook microtubule-tethering protein 3                         | 1.52289 | 0.0001123 | -1.67554 | 6.94E-06   |
| A_51_P442016 | CAMKK2         | calcium/calmodulin-dependent protein kinase kinase 2, beta   | 1.52294 | 0.0058681 | -3.32632 | 2.90E-09   |

|              |          |                                                              |         |           |          |            |
|--------------|----------|--------------------------------------------------------------|---------|-----------|----------|------------|
| A_51_P432460 | PPP1R14A | protein phosphatase 1, regulatory (inhibitor) subunit 14A    | 1.52366 | 0.0026    | 3.96399  | 1.67E-11   |
| A_52_P683146 | CDH11    | cadherin 11, type 2, OB-cadherin (osteoblast)                | 1.52376 | 2.01E-06  | 1.77822  | 7.11E-09   |
| A_52_P632617 | SMCR8    | Smith-Magenis syndrome chromosome region, candidate 8        | 1.52424 | 0.0001218 | 2.78085  | 1.65E-11   |
| A_51_P507290 | KLF5     | Kruppel-like factor 5 (intestinal)                           | 1.52457 | 0.0014423 | 1.65558  | 0.00022921 |
| A_51_P167562 | Erdr1    | erythroid differentiation regulator 1                        | 1.5246  | 4.65E-07  | 1.77855  | 1.20E-09   |
| A_52_P361664 | VTI1A    | vesicle transport through interaction with t-SNAREs 1A       | 1.52467 | 6.93E-07  | -1.63375 | 4.59E-08   |
| A_51_P209150 | PCDH10   | protocadherin 10                                             | 1.52522 | 0.0050462 | 1.5542   | 0.00359139 |
| A_52_P617080 | TMX2     | thioredoxin-related transmembrane protein 2                  | 1.52531 | 2.26E-08  | 1.55818  | 8.62E-09   |
| A_51_P464158 | TMEM128  | transmembrane protein 128                                    | 1.52552 | 0.0006302 | 1.77641  | 1.46E-05   |
| A_52_P73214  | GTF3C4   | general transcription factor IIIC, polypeptide 4, 90kDa      | 1.52577 | 1.53E-05  | -1.51218 | 2.07E-05   |
| A_51_P219061 | OXA1L    | oxidase (cytochrome c) assembly 1-like                       | 1.52585 | 0.000103  | 1.50487  | 0.00015414 |
| A_52_P224125 | FZD5     | frizzled class receptor 5                                    | 1.52634 | 0.0076086 | 2.2516   | 6.69E-06   |
| A_52_P637338 | ALKBH7   | alkB homolog 7                                               | 1.52707 | 5.45E-06  | 2.33788  | 7.05E-12   |
| A_51_P378550 | OPLAH    | 5-oxoprolinase (ATP-hydrolysing)                             | 1.52765 | 0.0002855 | -1.60253 | 8.01E-05   |
| A_52_P221887 | REPIN1   | replication initiator 1                                      | 1.52884 | 0.0007137 | 2.82543  | 4.65E-10   |
| A_52_P57889  | MPP7     | membrane protein, palmitoylated 7 (MAGUK p55 subfamily)      | 1.52894 | 0.0025006 | 1.92957  | 1.88E-05   |
| A_51_P385961 | SIDT2    | SID1 transmembrane family, member 2                          | 1.5299  | 2.92E-05  | 2.10045  | 1.92E-09   |
| A_52_P107674 | RBM4B    | RNA binding motif protein 4B                                 | 1.52991 | 0.0001659 | 2.92168  | 1.24E-11   |
| A_51_P208801 | NDUFAB1  | NADH dehydrogenase (ubiquinone) 1, alpha/beta subcompl       | 1.5306  | 0.0056758 | -1.75983 | 0.00044573 |
| A_52_P331227 |          |                                                              | 1.53086 | 0.0008927 | 3.83123  | 2.57E-12   |
| A_51_P256759 | ATRAID   | all-trans retinoic acid-induced differentiation factor       | 1.53174 | 0.0001973 | 2.24799  | 7.48E-09   |
| A_52_P676108 | RNASEH2A | ribonuclease H2, subunit A                                   | 1.53181 | 4.21E-06  | -2.09706 | 1.24E-10   |
| A_52_P577123 | CLIP1    | CAP-GLY domain containing linker protein 1                   | 1.53239 | 0.0008367 | 1.75971  | 3.15E-05   |
| A_51_P495492 | STX4     | syntaxin 4                                                   | 1.53273 | 3.29E-06  | -2.37767 | 2.56E-12   |
| A_51_P336161 | MAN2B1   | mannosidase, alpha, class 2B, member 1                       | 1.53308 | 1.16E-06  | 2.03609  | 5.38E-11   |
| A_52_P475889 | Uba52    | ubiquitin A-52 residue ribosomal protein fusion product 1    | 1.53411 | 2.97E-05  | 1.55578  | 1.90E-05   |
| A_52_P418056 | SEC24B   | SEC24 homolog B, COPII coat complex component                | 1.53432 | 6.39E-06  | 1.89343  | 5.49E-09   |
| A_52_P214740 | UBE2L6   | ubiquitin-conjugating enzyme E2L 6                           | 1.53474 | 0.0008329 | 2.05541  | 8.29E-07   |
| A_51_P279851 | DHPS     | deoxyhypusine synthase                                       | 1.53535 | 1.15E-07  | -1.54939 | 7.82E-08   |
| A_51_P237548 | DZANK1   | double zinc ribbon and ankyrin repeat domains 1              | 1.53561 | 0.004991  | -1.5449  | 0.00448521 |
| A_52_P602669 | Serpib6d | serine (or cysteine) peptidase inhibitor, clade B, member 6d | 1.53681 | 0.0006504 | 1.6714   | 8.60E-05   |
| A_51_P464478 | IL4R     | interleukin 4 receptor                                       | 1.5377  | 0.0015742 | 1.68322  | 0.00022241 |
| A_51_P399896 | MATK     | megakaryocyte-associated tyrosine kinase                     | 1.53827 | 0.0007424 | -1.573   | 0.00043989 |
| A_51_P513979 | C9orf9   | chromosome 9 open reading frame 9                            | 1.53878 | 0.0033264 | -1.8744  | 6.68E-05   |
| A_52_P147633 | RWDD4    | RWD domain containing 4                                      | 1.53972 | 0.0007327 | -2.04753 | 8.29E-07   |
| A_51_P173459 | NIM1K    | NIM1 serine/threonine protein kinase                         | 1.54005 | 0.000778  | -1.57668 | 0.00045042 |
| A_52_P628162 | ZNF592   | zinc finger protein 592                                      | 1.54026 | 0.0027708 | 1.59116  | 0.00146535 |
| A_51_P495232 | GPX8     | glutathione peroxidase 8 (putative)                          | 1.54032 | 0.0001517 | 2.06157  | 5.55E-08   |
| A_52_P126070 | CENPW    | centromere protein W                                         | 1.5414  | 0.0006439 | 2.08558  | 4.53E-07   |
| A_51_P437737 | DHODH    | dihydroorotate dehydrogenase (quinone)                       | 1.54168 | 8.14E-06  | -1.749   | 1.18E-07   |
| A_51_P177659 | ABHD18   | abhydrolase domain containing 18                             | 1.54175 | 0.0010735 | -1.56156 | 0.00080825 |
| A_52_P164161 | CYP51A1  | cytochrome P450, family 51, subfamily A, polypeptide 1       | 1.54199 | 5.86E-07  | -2.94957 | 1.19E-15   |
| A_51_P373428 | SLC16A13 | solute carrier family 16, member 13                          | 1.54216 | 8.42E-05  | 2.40101  | 4.79E-10   |
| A_52_P574653 | BID      | BH3 interacting domain death agonist                         | 1.54282 | 8.37E-07  | -1.5345  | 1.03E-06   |
| A_52_P391081 | HINFP    | histone H4 transcription factor                              | 1.54342 | 7.54E-10  | 1.58824  | 1.91E-10   |
| A_52_P206526 | Gtf2ird2 | GTF2I repeat domain containing 2                             | 1.54346 | 1.17E-07  | -1.65637 | 6.52E-09   |
| A_52_P516091 | PLA2G15  | phospholipase A2, group XV                                   | 1.54435 | 1.63E-06  | 1.61217  | 3.32E-07   |
| A_52_P236088 | GDPD1    | glycerophosphodiester phosphodiesterase domain containir     | 1.54497 | 0.0028655 | 1.79266  | 0.00014855 |
| A_52_P598478 | CHCHD3   | coiled-coil-helix-coiled-coil-helix domain containing 3      | 1.545   | 8.71E-05  | 1.56249  | 6.30E-05   |
| A_51_P483488 | ABCB8    | ATP-binding cassette, sub-family B (MDR/TAP), member 8       | 1.54549 | 6.32E-05  | -1.8255  | 4.88E-07   |
| A_52_P644226 | PHTF1    | putative homeodomain transcription factor 1                  | 1.54553 | 5.02E-06  | 1.77535  | 4.44E-08   |
| A_51_P202033 | WLS      | wntless Wnt ligand secretion mediator                        | 1.54667 | 0.0005626 | 11.2329  | 5.47E-19   |
| A_51_P275976 | DOK1     | docking protein 1, 62kDa (downstream of tyrosine kinase 1)   | 1.5471  | 9.33E-05  | 5.48402  | 8.83E-17   |

|              |                      |                                                               |         |           |          |            |
|--------------|----------------------|---------------------------------------------------------------|---------|-----------|----------|------------|
| A_51_P288978 |                      |                                                               | 1.54879 | 0.0017591 | -2.09957 | 2.65E-06   |
| A_52_P93933  | MCL1                 | myeloid cell leukemia 1                                       | 1.54885 | 1.47E-05  | 2.13396  | 8.04E-10   |
| A_51_P459679 | F8A1 (includes other | coagulation factor VIII-associated 1                          | 1.55065 | 2.02E-05  | 8.23227  | 1.70E-20   |
| A_51_P477941 | FBXW4                | F-box and WD repeat domain containing 4                       | 1.55079 | 2.23E-05  | 3.02936  | 3.02E-13   |
| A_51_P309740 | USP40                | ubiquitin specific peptidase 40                               | 1.55084 | 0.0006407 | 1.71118  | 6.24E-05   |
| A_52_P62037  | ANXA2                | annexin A2                                                    | 1.55215 | 1.46E-05  | -3.03603 | 1.46E-13   |
| A_52_P135707 | CREB3                | cAMP responsive element binding protein 3                     | 1.55224 | 2.63E-05  | 2.03278  | 8.10E-09   |
| A_52_P7105   | 2610005L07Rik        | cadherin 11 pseudogene                                        | 1.5531  | 0.0010621 | 3.29876  | 1.21E-10   |
| A_52_P228964 | SHPRH                | SNF2 histone linker PHD RING helicase, E3 ubiquitin protein   | 1.55315 | 0.0008328 | 1.89355  | 8.62E-06   |
| A_52_P500622 | ABHD18               | abhydrolase domain containing 18                              | 1.55339 | 0.0053753 | -2.78016 | 1.28E-07   |
| A_51_P408410 | CTSA                 | cathepsin A                                                   | 1.55348 | 6.04E-05  | 1.58718  | 3.22E-05   |
| A_51_P441286 | TTC5                 | tetratricopeptide repeat domain 5                             | 1.55428 | 4.95E-05  | 3.56791  | 5.06E-14   |
| A_51_P290207 | INSIG1               | insulin induced gene 1                                        | 1.55505 | 0.0005169 | -2.60061 | 3.12E-09   |
| A_52_P341708 | 1810015C11Rik        | RIKEN cDNA 1810015C11 gene                                    | 1.55592 | 0.0010208 | 1.54199  | 0.00124153 |
| A_51_P463452 | ACSL1                | acyl-CoA synthetase long-chain family member 1                | 1.55686 | 0.0012416 | -2.01667 | 4.22E-06   |
| A_52_P522023 | ALKBH1               | alkB homolog 1, histone H2A dioxygenase                       | 1.55739 | 1.27E-07  | 1.64126  | 1.54E-08   |
| A_52_P668984 | TMEM243              | transmembrane protein 243, mitochondrial                      | 1.55945 | 0.0001099 | -2.38226 | 1.55E-09   |
| A_51_P364153 | OBFC1                | oligonucleotide/oligosaccharide-binding fold containing 1     | 1.55975 | 0.0013409 | -1.78312 | 7.53E-05   |
| A_51_P504354 | NRARP                | NOTCH-regulated ankyrin repeat protein                        | 1.5598  | 0.0072492 | 1.8891   | 0.00028521 |
| A_51_P290986 | DHCR7                | 7-dehydrocholesterol reductase                                | 1.56027 | 3.86E-07  | -2.37825 | 3.08E-13   |
| A_52_P471175 | DENND5B              | DENN/MADD domain containing 5B                                | 1.56056 | 0.0013869 | 1.78597  | 7.72E-05   |
| A_52_P570266 | PSMB10               | proteasome subunit beta 10                                    | 1.56121 | 0.0003659 | -1.94954 | 1.51E-06   |
| A_51_P144825 | TPP1                 | tripeptidyl peptidase I                                       | 1.56125 | 0.0078827 | 1.6976   | 0.00204386 |
| A_51_P482571 | WNT6                 | wingless-type MMTV integration site family, member 6          | 1.56318 | 2.05E-06  | 6.88982  | 4.95E-21   |
| A_52_P600600 | MYO5B                | myosin VB                                                     | 1.56324 | 0.0010469 | -1.92569 | 1.03E-05   |
| A_51_P212038 | ATP6V0E2             | ATPase, H+ transporting V0 subunit e2                         | 1.5637  | 1.39E-06  | 2.2965   | 5.49E-12   |
| A_52_P661102 | Xpnpep3              | X-prolyl aminopeptidase (aminopeptidase P) 3, putative        | 1.5643  | 0.0006346 | 1.69251  | 0.00010215 |
| A_52_P18559  | SBNO2                | strawberry notch homolog 2 (Drosophila)                       | 1.56665 | 0.0004563 | 3.52871  | 8.29E-12   |
| A_51_P133252 | SLC27A3              | solute carrier family 27 (fatty acid transporter), member 3   | 1.56785 | 0.0017793 | 4.77007  | 1.50E-12   |
| A_51_P359122 | TMEM238              | transmembrane protein 238                                     | 1.56918 | 0.0022095 | -2.00357 | 1.62E-05   |
| A_52_P285277 | ST7                  | suppression of tumorigenicity 7                               | 1.56983 | 0.0075911 | 1.90012  | 0.00032497 |
| A_51_P461475 | ATN1                 | atrophin 1                                                    | 1.56988 | 7.03E-10  | 1.76396  | 4.21E-12   |
| A_52_P325161 | ZBTB10               | zinc finger and BTB domain containing 10                      | 1.56998 | 1.21E-05  | 2.43569  | 3.48E-11   |
| A_51_P137953 | UGDH                 | UDP-glucose 6-dehydrogenase                                   | 1.57051 | 4.80E-07  | -1.9934  | 1.11E-10   |
| A_51_P245090 | AQP3                 | aquaporin 3 (Gill blood group)                                | 1.57363 | 3.99E-05  | 3.27986  | 3.52E-13   |
| A_52_P43727  | KIAA0930             | KIAA0930                                                      | 1.57369 | 1.45E-06  | 1.57294  | 1.48E-06   |
| A_52_P655925 | SFMBT2               | Scm-like with four mbt domains 2                              | 1.57422 | 0.0004255 | -1.78469 | 2.11E-05   |
| A_52_P515907 | C18orf54             | chromosome 18 open reading frame 54                           | 1.57485 | 0.0002967 | 2.02401  | 6.10E-07   |
| A_51_P407417 | ADAMTS9              | ADAM metalloproteinase with thrombospondin type 1 motif,      | 1.57513 | 0.0018559 | -1.78426 | 0.0001505  |
| A_52_P46419  | GRK6                 | G protein-coupled receptor kinase 6                           | 1.57527 | 6.45E-08  | 1.60807  | 2.79E-08   |
| A_52_P82704  | BCL11A               | B-cell CLL/lymphoma 11A (zinc finger protein)                 | 1.57558 | 0.0063302 | -16.5993 | 4.48E-17   |
| A_51_P354724 | WDR83                | WD repeat domain 83                                           | 1.5756  | 6.68E-05  | -1.5047  | 0.00024214 |
| A_52_P580145 | ZNF526               | zinc finger protein 526                                       | 1.57562 | 3.63E-05  | 4.57303  | 7.00E-16   |
| A_51_P236769 | DNASE1L1             | deoxyribonuclease I-like 1                                    | 1.57573 | 1.41E-06  | -3.91698 | 4.08E-17   |
| A_52_P579519 | TMEM144              | transmembrane protein 144                                     | 1.57601 | 2.51E-05  | 3.13644  | 4.20E-13   |
| A_52_P571715 | TROAP                | trophinin associated protein                                  | 1.57613 | 0.0002859 | 2.81264  | 3.56E-10   |
| A_51_P345836 | PRKRA                | protein kinase, interferon-inducible double stranded RNA de   | 1.57677 | 3.49E-06  | -3.15311 | 1.45E-14   |
| A_51_P416974 | PBX3                 | pre-B-cell leukemia homeobox 3                                | 1.57711 | 0.0002324 | -2.27209 | 2.79E-08   |
| A_52_P215539 | C8orf82              | chromosome 8 open reading frame 82                            | 1.57713 | 3.78E-06  | 1.52993  | 1.07E-05   |
| A_52_P195922 | EXOSC6               | exosome component 6                                           | 1.5772  | 7.52E-08  | 1.83842  | 2.16E-10   |
| A_51_P259773 | SLC37A2              | solute carrier family 37 (glucose-6-phosphate transporter), r | 1.57815 | 6.76E-05  | 6.99996  | 4.42E-18   |
| A_52_P571444 | WWTR1                | WW domain containing transcription regulator 1                | 1.57823 | 0.0033652 | -1.54267 | 0.00502886 |
| A_52_P29765  | CMC1                 | C-x(9)-C motif containing 1                                   | 1.57905 | 0.0001089 | 1.50981  | 0.00036003 |

|              |                                             |                                                                |         |           |          |            |
|--------------|---------------------------------------------|----------------------------------------------------------------|---------|-----------|----------|------------|
| A_52_P226476 | KIF7                                        | kinesin family member 7                                        | 1.57982 | 2.82E-06  | 1.61429  | 1.34E-06   |
| A_52_P4666   | CENPK                                       | centromere protein K                                           | 1.58058 | 0.0010018 | -2.53541 | 3.95E-08   |
| A_52_P319181 | EFCAB11                                     | EF-hand calcium binding domain 11                              | 1.58185 | 0.0001869 | -1.69114 | 3.39E-05   |
| A_51_P383369 | TENM3                                       | teneurin transmembrane protein 3                               | 1.58246 | 1.90E-05  | -3.31457 | 1.03E-13   |
| A_51_P140721 | CHST14                                      | carbohydrate (N-acetylgalactosamine 4-0) sulfotransferase 1    | 1.58265 | 7.92E-05  | 2.5867   | 2.60E-10   |
| A_52_P65268  | THNSL1                                      | threonine synthase-like 1                                      | 1.5828  | 8.94E-05  | 2.43691  | 1.27E-09   |
| A_51_P145507 | FOXO3                                       | forkhead box O3                                                | 1.58371 | 0.0005553 | 3.43847  | 3.50E-11   |
| A_51_P177502 | DDX19B                                      | DEAD (Asp-Glu-Ala-Asp) box polypeptide 19B                     | 1.5839  | 2.53E-06  | 2.15963  | 1.36E-10   |
| A_51_P356705 | PLEKHB2                                     | pleckstrin homology domain containing, family B (evectins) 1   | 1.58426 | 0.0015332 | 4.20724  | 1.22E-11   |
| A_51_P242608 | 9130019O22Rik/ZfRRIKEN cDNA 9130019O22 gene |                                                                | 1.58458 | 5.92E-09  | 1.64977  | 1.06E-09   |
| A_51_P350252 | FAT1                                        | FAT atypical cadherin 1                                        | 1.58465 | 0.001065  | 2.32694  | 2.87E-07   |
| A_52_P325428 | ANKZF1                                      | ankyrin repeat and zinc finger domain containing 1             | 1.5847  | 0.000702  | 1.52132  | 0.00170367 |
| A_52_P416756 | D17H6S56E-5                                 | DNA segment, Chr 17, human D6S56E 5                            | 1.5855  | 6.26E-07  | -1.84183 | 3.18E-09   |
| A_52_P287328 | ARMC6                                       | armadillo repeat containing 6                                  | 1.5858  | 0.0089834 | 1.94286  | 0.00037292 |
| A_52_P542710 | C4orf27                                     | chromosome 4 open reading frame 27                             | 1.58595 | 0.0022398 | -2.21399 | 3.16E-06   |
| A_51_P427736 | GOPC                                        | golgi-associated PDZ and coiled-coil motif containing          | 1.58712 | 0.0023705 | 1.67701  | 0.00083832 |
| A_51_P291585 | MPHOSPH9                                    | M-phase phosphoprotein 9                                       | 1.58724 | 8.40E-05  | 2.43788  | 1.29E-09   |
| A_51_P494430 | ID4                                         | inhibitor of DNA binding 4, dominant negative helix-loop-helix | 1.58733 | 0.0020732 | 1.88713  | 6.93E-05   |
| A_52_P31543  | BTG2                                        | BTG family, member 2                                           | 1.58869 | 5.18E-08  | 15.5808  | 2.69E-27   |
| A_52_P271244 | POLD3                                       | polymerase (DNA-directed), delta 3, accessory subunit          | 1.5888  | 4.67E-05  | -1.55448 | 8.68E-05   |
| A_51_P192501 | GRAMD3                                      | GRAM domain containing 3                                       | 1.58898 | 0.0017836 | -2.27125 | 1.34E-06   |
| A_51_P503004 | CPNE7                                       | copine VII                                                     | 1.58958 | 0.0092472 | 3.0542   | 2.59E-07   |
| A_51_P361201 | ATP6V0D1                                    | ATPase, H+ transporting, lysosomal 38kDa, V0 subunit d1        | 1.59019 | 0.0078466 | 1.87008  | 0.00060331 |
| A_52_P412417 | TNFAIP3                                     | tumor necrosis factor, alpha-induced protein 3                 | 1.5903  | 0.0001051 | 1.73083  | 1.11E-05   |
| A_51_P471760 | ZNF780B                                     | zinc finger protein 780B                                       | 1.59134 | 0.0021293 | -1.61662 | 0.00158193 |
| A_52_P531829 | OXA1L                                       | oxidase (cytochrome c) assembly 1-like                         | 1.59164 | 0.0004003 | 1.73392  | 5.37E-05   |
| A_51_P114297 | KIFC3                                       | kinesin family member C3                                       | 1.59196 | 5.60E-06  | -2.11805 | 8.97E-10   |
| A_51_P368543 | ABHD8                                       | abhydrolase domain containing 8                                | 1.59205 | 7.56E-05  | -1.69635 | 1.34E-05   |
| A_51_P389895 | SLC35F5                                     | solute carrier family 35, member F5                            | 1.59207 | 7.40E-06  | -3.40779 | 1.63E-14   |
| A_51_P234881 | ELOVL4                                      | ELOVL fatty acid elongase 4                                    | 1.59211 | 1.50E-06  | 2.44566  | 2.82E-12   |
| A_51_P388847 | STAP2                                       | signal transducing adaptor family member 2                     | 1.59297 | 0.0001019 | -3.50692 | 1.03E-12   |
| A_51_P220934 | VSTM5                                       | V-set and transmembrane domain containing 5                    | 1.59306 | 6.94E-07  | -7.91096 | 3.97E-22   |
| A_51_P234692 | Neat1                                       | nuclear paraspeckle assembly transcript 1 (non-protein coding) | 1.59339 | 0.0007527 | 2.22931  | 4.73E-07   |
| A_51_P367060 | IFRD1                                       | interferon-related developmental regulator 1                   | 1.59361 | 1.33E-06  | 1.85819  | 7.40E-09   |
| A_52_P301724 | NAB1                                        | NGFI-A binding protein 1 (EGR1 binding protein 1)              | 1.5949  | 0.0003157 | 2.0801   | 5.61E-07   |
| A_51_P113068 | AGO3                                        | argonaute RISC catalytic component 3                           | 1.59564 | 0.0044652 | 2.06924  | 4.63E-05   |
| A_52_P308875 | APOBEC3B                                    | apolipoprotein B mRNA editing enzyme, catalytic polypeptide 3  | 1.59892 | 0.0029774 | -10.8213 | 5.83E-16   |
| A_51_P485410 | ZSCAN22                                     | zinc finger and SCAN domain containing 22                      | 1.60003 | 4.82E-08  | 3.56486  | 4.19E-18   |
| A_51_P488646 | BMP1                                        | bone morphogenetic protein 1                                   | 1.60037 | 0.000196  | 2.12142  | 1.92E-07   |
| A_52_P516130 | TMEM164                                     | transmembrane protein 164                                      | 1.60093 | 6.49E-08  | -2.27113 | 4.08E-13   |
| A_51_P225889 | TIA1                                        | TIA1 cytotoxic granule-associated RNA binding protein          | 1.60118 | 0.0018035 | -1.93927 | 4.16E-05   |
| A_52_P468378 | Pdxk-ps                                     | pyridoxal (pyridoxine, vitamin B6) kinase, pseudogene          | 1.60242 | 9.31E-05  | -2.12379 | 6.34E-08   |
| A_52_P462013 | CLN8                                        | ceroid-lipofuscinosis, neuronal 8                              | 1.60287 | 2.29E-06  | 2.38779  | 1.35E-11   |
| A_51_P300618 | CRB2                                        | crumbs family member 2                                         | 1.60377 | 0.009255  | 2.34624  | 2.44E-05   |
| A_51_P108573 | TMEM62                                      | transmembrane protein 62                                       | 1.60509 | 0.0009322 | 2.58551  | 4.32E-08   |
| A_51_P372550 | CGREF1                                      | cell growth regulator with EF-hand domain 1                    | 1.60666 | 5.36E-05  | 7.69133  | 2.18E-18   |
| A_51_P373911 | C1QTNF5                                     | C1q and tumor necrosis factor related protein 5                | 1.60671 | 7.36E-06  | 2.84664  | 1.22E-12   |
| A_51_P473272 | TSPAN6                                      | tetraspanin 6                                                  | 1.60673 | 0.0038205 | 5.00832  | 2.04E-11   |
| A_51_P323642 | Vmn1r49 (includes)                          | vomer nasal 1, receptor 49                                     | 1.60712 | 0.0031401 | 4.33568  | 9.79E-11   |
| A_52_P414464 | RCAN2                                       | regulator of calcineurin 2                                     | 1.60719 | 0.0003353 | -1.97155 | 2.80E-06   |
| A_52_P337550 | FAF2                                        | Fas associated factor family member 2                          | 1.60769 | 0.000957  | 2.12951  | 2.56E-06   |
| A_51_P448814 | ZFP90                                       | ZFP90 zinc finger protein                                      | 1.60799 | 5.78E-05  | -1.74531 | 6.22E-06   |
| A_52_P186785 | LOC102642189                                | uncharacterized LOC102642189                                   | 1.60812 | 2.74E-06  | 2.48925  | 7.00E-12   |

|              |                                                        |                                                               |         |           |          |            |
|--------------|--------------------------------------------------------|---------------------------------------------------------------|---------|-----------|----------|------------|
| A_51_P171999 | APOE                                                   | apolipoprotein E                                              | 1.60856 | 2.34E-08  | 1.74913  | 8.85E-10   |
| A_52_P686091 | PHF2                                                   | PHD finger protein 2                                          | 1.60884 | 0.0002732 | 1.6061   | 0.00028439 |
| A_52_P59400  | C8orf34                                                | chromosome 8 open reading frame 34                            | 1.6095  | 4.60E-05  | 1.60166  | 5.27E-05   |
| A_51_P165027 | PYGO1                                                  | pygopus family PHD finger 1                                   | 1.6097  | 0.0067498 | -1.55742 | 0.0110217  |
| A_51_P334730 | SRD5A3                                                 | steroid 5 alpha-reductase 3                                   | 1.60999 | 0.0007152 | -2.05632 | 3.56E-06   |
| A_51_P481489 | ROBO3                                                  | roundabout guidance receptor 3                                | 1.61012 | 9.70E-05  | 21.0357  | 1.89E-22   |
| A_51_P124719 | CCDC93                                                 | coiled-coil domain containing 93                              | 1.61016 | 1.26E-06  | -1.50478 | 1.34E-05   |
| A_51_P331798 | PIP5KL1                                                | phosphatidylinositol-4-phosphate 5-kinase-like 1              | 1.6103  | 0.0088441 | -4.7008  | 6.70E-10   |
| A_52_P159490 | PPP1R9A                                                | protein phosphatase 1, regulatory subunit 9A                  | 1.61099 | 0.0005032 | -1.83958 | 2.58E-05   |
| A_51_P183515 | 2210416O15Rik                                          | RIKEN cDNA 2210416O15 gene                                    | 1.61136 | 0.0004058 | 2.55176  | 1.39E-08   |
| A_51_P305537 | ST3GAL2                                                | ST3 beta-galactoside alpha-2,3-sialyltransferase 2            | 1.61189 | 0.0006172 | 1.54147  | 0.00159579 |
| A_51_P171288 | GLI3                                                   | GLI family zinc finger 3                                      | 1.61216 | 5.15E-07  | 1.53135  | 3.34E-06   |
| A_52_P455089 | EIF3C                                                  | eukaryotic translation initiation factor 3, subunit C         | 1.61291 | 3.72E-10  | 1.7376   | 1.50E-11   |
| A_51_P520894 | SLC4A3                                                 | solute carrier family 4 (anion exchanger), member 3           | 1.61308 | 0.0001601 | 2.43144  | 8.14E-09   |
| A_52_P10017  | TMEM64                                                 | transmembrane protein 64                                      | 1.61343 | 0.0010511 | 1.55959  | 0.00206565 |
| A_51_P266640 | NOB1                                                   | NIN1/RPN12 binding protein 1 homolog                          | 1.61395 | 2.74E-05  | 2.56412  | 1.36E-10   |
| A_51_P516756 | HIPK3                                                  | homeodomain interacting protein kinase 3                      | 1.6145  | 0.0001228 | 1.92409  | 1.45E-06   |
| A_52_P337427 | IZUMO4                                                 | IZUMO family member 4                                         | 1.61451 | 6.00E-07  | 2.67307  | 1.60E-13   |
| A_52_P515057 | SLC25A24                                               | solute carrier family 25 (mitochondrial carrier; phosphate ca | 1.61461 | 0.0065727 | 2.45841  | 6.84E-06   |
| A_51_P367763 | PELI2                                                  | pellino E3 ubiquitin protein ligase family member 2           | 1.61463 | 1.05E-05  | 2.49615  | 5.88E-11   |
| A_51_P327322 | CENPK                                                  | centromere protein K                                          | 1.6153  | 0.0011663 | -2.53521 | 1.25E-07   |
| A_51_P274091 | PPP1R15B                                               | protein phosphatase 1, regulatory subunit 15B                 | 1.61548 | 6.64E-06  | 1.76773  | 4.10E-07   |
| A_51_P506284 | PDLIM7                                                 | PDZ and LIM domain 7 (enigma)                                 | 1.61596 | 0.0076398 | -2.64155 | 2.99E-06   |
| A_52_P375455 | PRKCE                                                  | protein kinase C, epsilon                                     | 1.61597 | 0.0019815 | 2.99023  | 1.76E-08   |
| A_52_P18262  | PLCB1                                                  | phospholipase C, beta 1 (phosphoinositide-specific)           | 1.61603 | 0.0065362 | 1.77746  | 0.00149092 |
| A_51_P382849 | EMB                                                    | embigin                                                       | 1.61616 | 2.87E-07  | -2.79975 | 1.93E-14   |
| A_51_P357433 | AP1G2                                                  | adaptor-related protein complex 1, gamma 2 subunit            | 1.61695 | 0.0001549 | -4.45822 | 7.47E-14   |
| A_51_P320888 | CLN5                                                   | ceroid-lipofuscinosis, neuronal 5                             | 1.61705 | 0.0006323 | 1.74557  | 0.00012142 |
| A_51_P157042 | CTGF                                                   | connective tissue growth factor                               | 1.61799 | 8.20E-05  | 6.95142  | 2.90E-17   |
| A_52_P145349 | STRADB                                                 | STE20-related kinase adaptor beta                             | 1.61926 | 3.84E-07  | -1.58609 | 8.13E-07   |
| A_52_P200286 | DNAH17                                                 | dynein, axonemal, heavy chain 17                              | 1.61973 | 0.0038389 | 3.3315   | 1.44E-08   |
| A_51_P297579 | GCH1                                                   | GTP cyclohydrolase 1                                          | 1.62029 | 7.07E-06  | -1.55155 | 2.72E-05   |
| A_51_P175736 | YIF1A                                                  | Yip1 interacting factor homolog A (S. cerevisiae)             | 1.62077 | 8.72E-06  | 4.88538  | 8.23E-17   |
| A_52_P278354 | BMP7                                                   | bone morphogenetic protein 7                                  | 1.62098 | 1.91E-05  | 2.28385  | 1.56E-09   |
| A_51_P251754 | C15orf61                                               | chromosome 15 open reading frame 61                           | 1.62177 | 0.0065482 | 1.69561  | 0.00333427 |
| A_51_P215356 | PDE4DIP                                                | phosphodiesterase 4D interacting protein                      | 1.62327 | 1.23E-05  | 1.84409  | 2.89E-07   |
| A_52_P129697 | STRADB                                                 | STE20-related kinase adaptor beta                             | 1.62374 | 0.004461  | -1.51089 | 0.0136193  |
| A_51_P205170 | ZNF282                                                 | zinc finger protein 282                                       | 1.62396 | 0.0001729 | 2.22311  | 9.22E-08   |
| A_52_P281935 | PPP6R3                                                 | protein phosphatase 6, regulatory subunit 3                   | 1.62416 | 0.0005671 | 3.54682  | 6.94E-11   |
| A_52_P322141 | CCDC88B                                                | coiled-coil domain containing 88B                             | 1.6242  | 9.09E-05  | 4.65259  | 1.59E-14   |
| A_52_P566605 | HSD17B7                                                | hydroxysteroid (17-beta) dehydrogenase 7                      | 1.62523 | 9.00E-07  | -1.54921 | 4.75E-06   |
| A_51_P119544 | AGA                                                    | aspartylglucosaminidase                                       | 1.62575 | 2.07E-07  | 4.44826  | 1.20E-18   |
| A_51_P310862 | Rsl1 (includes otherregulator of sex limited protein 1 |                                                               | 1.62597 | 0.0001134 | 2.8877   | 1.56E-10   |
| A_52_P625873 | HELQ                                                   | helicase, POLQ-like                                           | 1.62695 | 0.0069736 | 1.9702   | 0.00036013 |
| A_51_P129929 | Zfp866                                                 | zinc finger protein 866                                       | 1.6274  | 0.0001835 | 1.70318  | 6.13E-05   |
| A_51_P484158 | STEAP1                                                 | six transmembrane epithelial antigen of the prostate 1        | 1.62777 | 0.00012   | 1.53418  | 0.00051899 |
| A_51_P487360 | HPCAL1                                                 | hippocalcin-like 1                                            | 1.62792 | 3.29E-07  | 2.25085  | 9.88E-12   |
| A_52_P201482 | PRICKLE2                                               | prickle homolog 2                                             | 1.62792 | 0.0032115 | -4.53166 | 9.74E-11   |
| A_51_P427080 | ASAP2                                                  | ArfGAP with SH3 domain, ankyrin repeat and PH domain 2        | 1.62877 | 2.14E-06  | -3.22919 | 2.22E-14   |
| A_51_P150530 | TM2D1                                                  | TM2 domain containing 1                                       | 1.62898 | 8.03E-06  | 2.7765   | 4.81E-12   |
| A_52_P390700 |                                                        |                                                               | 1.62898 | 0.0008084 | -1.71689 | 0.00027404 |
| A_52_P361338 | Rab10os                                                | RAB10, member RAS oncogene family, opposite strand            | 1.62982 | 0.0007692 | 1.87667  | 4.04E-05   |
| A_52_P528963 | EPS15L1                                                | epidermal growth factor receptor pathway substrate 15-like    | 1.63018 | 0.0001166 | 2.07288  | 3.05E-07   |

|              |          |                                                                  |         |           |          |            |
|--------------|----------|------------------------------------------------------------------|---------|-----------|----------|------------|
| A_51_P328439 | ZNF423   | zinc finger protein 423                                          | 1.63041 | 0.0039813 | -3.16881 | 4.61E-08   |
| A_52_P177021 | PTS      | 6-pyruvoyltetrahydropterin synthase                              | 1.63091 | 7.79E-06  | -2.37199 | 2.10E-10   |
| A_51_P114551 | C1orf123 | chromosome 1 open reading frame 123                              | 1.63124 | 3.01E-05  | 2.1663   | 1.49E-08   |
| A_51_P157524 | E2F4     | E2F transcription factor 4, p107/p130-binding                    | 1.63135 | 0.0003777 | -2.20124 | 4.66E-07   |
| A_52_P597618 | ACSL1    | acyl-CoA synthetase long-chain family member 1                   | 1.63168 | 3.51E-05  | -2.48358 | 6.89E-10   |
| A_51_P280401 | TCTA     | T-cell leukemia translocation altered                            | 1.63208 | 4.57E-05  | 2.9466   | 2.47E-11   |
| A_51_P433824 | TPI1     | triosephosphate isomerase 1                                      | 1.63267 | 9.16E-08  | -3.91234 | 4.90E-18   |
| A_52_P321875 | RPL31    | ribosomal protein L31                                            | 1.6349  | 1.25E-05  | 1.65803  | 8.31E-06   |
| A_51_P296517 | ESRP2    | epithelial splicing regulatory protein 2                         | 1.63546 | 4.18E-09  | -1.79347 | 1.10E-10   |
| A_52_P75034  | C8orf58  | chromosome 8 open reading frame 58                               | 1.63546 | 5.89E-07  | -2.93531 | 3.24E-14   |
| A_52_P271572 | ECE2     | endothelin converting enzyme 2                                   | 1.63601 | 0.0033869 | -2.28977 | 9.58E-06   |
| A_52_P183071 | RNF146   | ring finger protein 146                                          | 1.63624 | 1.31E-06  | 1.64585  | 1.08E-06   |
| A_51_P213030 | MACROD1  | MACRO domain containing 1                                        | 1.63695 | 1.41E-06  | 2.3243   | 3.73E-11   |
| A_51_P244586 | ZNF618   | zinc finger protein 618                                          | 1.63986 | 0.0001439 | -1.53279 | 0.00072288 |
| A_51_P439824 | GIPC1    | GIPC PDZ domain containing family, member 1                      | 1.64046 | 9.21E-07  | -2.15589 | 1.84E-10   |
| A_51_P435027 | TMEM186  | transmembrane protein 186                                        | 1.64062 | 0.001502  | 2.51524  | 4.16E-07   |
| A_51_P425944 | KPNA6    | karyopherin alpha 6 (importin alpha 7)                           | 1.6425  | 0.0083437 | 2.22123  | 9.10E-05   |
| A_52_P78730  | C11orf1  | chromosome 11 open reading frame 1                               | 1.64262 | 3.83E-07  | 2.61162  | 3.58E-13   |
| A_52_P56488  | ZNF558   | zinc finger protein 558                                          | 1.64274 | 0.0090044 | -1.6201  | 0.0108692  |
| A_51_P427934 | MEGF8    | multiple EGF-like-domains 8                                      | 1.64323 | 0.0001977 | 1.52972  | 0.00102952 |
| A_52_P131418 | SNX9     | sorting nexin 9                                                  | 1.64557 | 9.01E-06  | -1.55343 | 4.99E-05   |
| A_52_P223269 | ZFP37    | ZFP37 zinc finger protein                                        | 1.64738 | 0.0013158 | 2.97539  | 1.71E-08   |
| A_51_P268697 | SLC1A3   | solute carrier family 1 (glial high affinity glutamate transport | 1.64808 | 1.10E-05  | -3.2692  | 4.19E-13   |
| A_51_P324410 | VTI1A    | vesicle transport through interaction with t-SNAREs 1A           | 1.64933 | 6.38E-06  | -2.44591 | 1.20E-10   |
| A_51_P502545 | GLCE     | glucuronic acid epimerase                                        | 1.64936 | 0.0051191 | 1.5322   | 0.0150569  |
| A_51_P451799 | ESPN     | espin                                                            | 1.64939 | 0.00231   | 1.57989  | 0.00479451 |
| A_51_P339380 | Setmar   | SET domain without mariner transposase fusion                    | 1.64976 | 0.001335  | 1.67985  | 0.00095225 |
| A_51_P385993 | RELA     | v-rel avian reticuloendotheliosis viral oncogene homolog A       | 1.65023 | 5.69E-07  | 1.9292   | 3.49E-09   |
| A_51_P293530 | RRP8     | ribosomal RNA processing 8, methyltransferase, homolog (y        | 1.65103 | 7.51E-07  | 1.68857  | 3.54E-07   |
| A_52_P490272 | NUP98    | nucleoporin 98kDa                                                | 1.65183 | 1.50E-05  | 1.68537  | 8.47E-06   |
| A_51_P173043 | EGR2     | early growth response 2                                          | 1.65184 | 0.0002449 | 1.7655   | 5.38E-05   |
| A_51_P424959 | BCL6B    | B-cell CLL/lymphoma 6, member B                                  | 1.65321 | 2.12E-06  | -2.20732 | 4.03E-10   |
| A_52_P338956 | ASPG     | asparaginase                                                     | 1.6535  | 7.50E-05  | -2.16596 | 9.42E-08   |
| A_51_P323812 | SLC6A12  | solute carrier family 6 (neurotransmitter transporter), meml     | 1.65413 | 0.0010983 | 1.84392  | 0.00013382 |
| A_52_P142191 | APH1B    | APH1B gamma secretase subunit                                    | 1.65525 | 0.0001801 | -3.39364 | 3.53E-11   |
| A_52_P17194  | MED22    | mediator complex subunit 22                                      | 1.65576 | 0.0001013 | 2.37065  | 1.94E-08   |
| A_51_P150521 | MGAT2    | mannosyl (alpha-1,6-)-glycoprotein beta-1,2-N-acetylglucos:      | 1.65626 | 0.0033466 | 2.22027  | 2.29E-05   |
| A_51_P235775 | MASTL    | microtubule associated serine/threonine kinase-like              | 1.65775 | 0.0001391 | -1.53913 | 0.00079332 |
| A_51_P105879 | MYO5B    | myosin VB                                                        | 1.65793 | 0.0013483 | -2.63764 | 2.03E-07   |
| A_51_P137800 | PAPL     | iron/zinc purple acid phosphatase-like protein                   | 1.65825 | 1.25E-07  | 2.58591  | 1.59E-13   |
| A_51_P304437 | PFKFB4   | 6-phosphofructo-2-kinase/fructose-2,6-biphosphatase 4            | 1.65932 | 8.74E-08  | 1.66935  | 7.02E-08   |
| A_52_P421713 | C8orf58  | chromosome 8 open reading frame 58                               | 1.65956 | 1.84E-07  | -3.06421 | 4.84E-15   |
| A_51_P465161 | HOGA1    | 4-hydroxy-2-oxoglutarate aldolase 1                              | 1.6597  | 0.0015032 | 2.7872   | 9.58E-08   |
| A_51_P477019 | RNASET2  | ribonuclease T2                                                  | 1.66029 | 0.004851  | 4.48954  | 8.10E-10   |
| A_51_P160576 | BRSK2    | BR serine/threonine kinase 2                                     | 1.66206 | 0.000713  | -1.89222 | 5.17E-05   |
| A_51_P120254 | FBXL8    | F-box and leucine-rich repeat protein 8                          | 1.66251 | 1.26E-05  | -1.66137 | 1.28E-05   |
| A_51_P251736 | REEP5    | receptor accessory protein 5                                     | 1.6628  | 0.000612  | 2.17846  | 2.34E-06   |
| A_51_P228974 | OGFOD2   | 2-oxoglutarate and iron-dependent oxygenase domain cont:         | 1.66422 | 1.98E-07  | 1.85259  | 5.24E-09   |
| A_52_P449199 | DYRK1B   | dual-specificity tyrosine-(Y)-phosphorylation regulated kinas    | 1.66434 | 0.0016268 | 2.1801   | 1.11E-05   |
| A_51_P505472 | ECE2     | endothelin converting enzyme 2                                   | 1.66439 | 0.0068875 | -2.74101 | 3.37E-06   |
| A_51_P300266 | FEM1C    | fem-1 homolog c (C. elegans)                                     | 1.66488 | 0.0004283 | -1.54336 | 0.00204675 |
| A_51_P277536 | RAMP2    | receptor (G protein-coupled) activity modifying protein 2        | 1.66494 | 0.0001474 | -2.15954 | 3.45E-07   |
| A_51_P433237 | CDH3     | cadherin 3, type 1, P-cadherin (placental)                       | 1.66633 | 0.0027025 | 1.51398  | 0.0123981  |

|              |                   |                                                                 |         |           |          |            |
|--------------|-------------------|-----------------------------------------------------------------|---------|-----------|----------|------------|
| A_52_P584058 | IVNS1ABP          | influenza virus NS1A binding protein                            | 1.66784 | 0.0043673 | -1.55924 | 0.011825   |
| A_52_P244030 | ZNF516            | zinc finger protein 516                                         | 1.66826 | 5.18E-06  | 1.52115  | 8.22E-05   |
| A_51_P444447 | CEBPD             | CCAAT/enhancer binding protein (C/EBP), delta                   | 1.66863 | 5.06E-05  | 2.62764  | 8.92E-10   |
| A_51_P176071 | CMTR2             | cap methyltransferase 2                                         | 1.66886 | 7.98E-06  | 4.41741  | 1.69E-15   |
| A_51_P130203 | PBX1              | pre-B-cell leukemia homeobox 1                                  | 1.66927 | 0.0001767 | -2.33336 | 8.93E-08   |
| A_52_P664506 | ABHD2             | abhydrolase domain containing 2                                 | 1.66993 | 3.98E-05  | 4.85689  | 6.50E-15   |
| A_52_P622614 | NFATC4            | nuclear factor of activated T-cells, cytoplasmic, calcineurin-d | 1.6703  | 0.0045308 | -1.65979 | 0.00498123 |
| A_51_P249544 | HAUS8             | HAUS augmin-like complex, subunit 8                             | 1.67102 | 1.40E-05  | -2.5549  | 2.41E-10   |
| A_51_P190454 | ZFP37             | ZFP37 zinc finger protein                                       | 1.67157 | 4.74E-05  | 1.63389  | 8.48E-05   |
| A_51_P246317 | Mt2               | metallothionein 2                                               | 1.67157 | 0.0005997 | 1.71166  | 0.00037206 |
| A_51_P371152 | SOS2              | son of sevenless homolog 2 (Drosophila)                         | 1.67162 | 0.0001772 | 2.65663  | 6.10E-09   |
| A_51_P506915 | PKP3              | plakophilin 3                                                   | 1.67253 | 2.07E-07  | 1.93759  | 1.60E-09   |
| A_51_P195066 | SEMA4A            | sema domain, immunoglobulin domain (Ig), transmembrane          | 1.67261 | 4.31E-09  | -2.62139 | 2.22E-15   |
| A_52_P502771 | RAD54B            | RAD54 homolog B (S. cerevisiae)                                 | 1.67319 | 3.08E-06  | -1.59074 | 1.45E-05   |
| A_51_P263568 | PRSS27            | protease, serine 27                                             | 1.67372 | 6.73E-06  | -1.59174 | 2.92E-05   |
| A_51_P452820 | RPL31             | ribosomal protein L31                                           | 1.67381 | 7.09E-08  | 1.60351  | 3.40E-07   |
| A_51_P237865 | IL4               | interleukin 4                                                   | 1.67393 | 0.0053235 | 1.64346  | 0.00694244 |
| A_51_P414320 | C1orf74           | chromosome 1 open reading frame 74                              | 1.67489 | 3.14E-06  | 1.59435  | 1.42E-05   |
| A_51_P373142 | AI854703          | expressed sequence AI854703                                     | 1.67688 | 2.31E-05  | 2.9116   | 3.43E-11   |
| A_51_P390285 | LARP6             | La ribonucleoprotein domain family, member 6                    | 1.677   | 0.0081613 | 7.19409  | 1.48E-11   |
| A_51_P422639 | HIVEP3            | human immunodeficiency virus type I enhancer binding prot       | 1.67741 | 4.13E-06  | 2.35912  | 3.26E-10   |
| A_52_P489193 | PDLIM7            | PDZ and LIM domain 7 (enigma)                                   | 1.67923 | 0.0001304 | -3.34295 | 4.76E-11   |
| A_52_P46742  | DFFB              | DNA fragmentation factor, 40kDa, beta polypeptide (caspas       | 1.67941 | 1.14E-06  | 4.06219  | 4.33E-16   |
| A_51_P366344 | TGFB111           | transforming growth factor beta 1 induced transcript 1          | 1.67954 | 0.0023123 | 4.06488  | 8.02E-10   |
| A_51_P265151 | ARHGEF10          | Rho guanine nucleotide exchange factor (GEF) 10                 | 1.67981 | 0.0001395 | -2.22167 | 2.28E-07   |
| A_52_P477286 | RAB8B             | RAB8B, member RAS oncogene family                               | 1.67988 | 0.0048741 | -1.62509 | 0.00788422 |
| A_52_P599317 | HS6ST2            | heparan sulfate 6-O-sulfotransferase 2                          | 1.68121 | 0.0032609 | 1.79265  | 0.00116884 |
| A_52_P379631 | STEAP2            | STEAP family member 2, metalloredutase                          | 1.68125 | 1.11E-07  | -2.91729 | 1.39E-14   |
| A_51_P435339 | EPOR              | erythropoietin receptor                                         | 1.68177 | 6.66E-05  | -2.71418 | 9.61E-10   |
| A_52_P183432 | POFUT1            | protein O-fucosyltransferase 1                                  | 1.6818  | 1.24E-06  | 1.66576  | 1.68E-06   |
| A_51_P295449 | MFSD5             | major facilitator superfamily domain containing 5               | 1.68331 | 8.50E-05  | 1.94293  | 2.71E-06   |
| A_52_P590258 | C1orf21           | chromosome 1 open reading frame 21                              | 1.68371 | 0.0013304 | -2.80148 | 1.15E-07   |
| A_52_P252305 | 1700047117Rik2/Fa | family with sequence similarity 177, member A                   | 1.68498 | 8.42E-07  | 1.54492  | 1.42E-05   |
| A_52_P289854 | ZCCHC24           | zinc finger, CCHC domain containing 24                          | 1.68547 | 2.55E-05  | -3.00844 | 2.54E-11   |
| A_51_P503751 | ING2              | inhibitor of growth family, member 2                            | 1.68662 | 1.13E-09  | -2.36286 | 1.14E-14   |
| A_52_P408728 | PLP1              | proteolipid protein 1                                           | 1.68719 | 0.00017   | -2.27315 | 2.15E-07   |
| A_52_P106294 | CDC14B            | cell division cycle 14B                                         | 1.68764 | 0.0021885 | -1.62726 | 0.00397776 |
| A_51_P346630 |                   |                                                                 | 1.68773 | 4.27E-05  | 1.59546  | 0.0001763  |
| A_51_P492366 | BMP7              | bone morphogenetic protein 7                                    | 1.68776 | 8.13E-08  | 2.20189  | 1.61E-11   |
| A_51_P468464 | GDPD5             | glycerophosphodiester phosphodiesterase domain containir        | 1.68834 | 1.14E-07  | 4.55208  | 2.40E-18   |
| A_51_P491355 | SUV420H1          | suppressor of variegation 4-20 homolog 1 (Drosophila)           | 1.68857 | 8.47E-05  | -1.70676 | 6.56E-05   |
| A_52_P403484 | PTPN2             | protein tyrosine phosphatase, non-receptor type 2               | 1.68866 | 0.0003792 | 1.70053  | 0.00032794 |
| A_52_P107234 | PRPF39            | pre-mRNA processing factor 39                                   | 1.68895 | 5.91E-05  | 2.51433  | 4.85E-09   |
| A_51_P315027 | KIAA1024          | KIAA1024                                                        | 1.689   | 0.00449   | -2.56247 | 6.23E-06   |
| A_52_P472936 | YTHDC1            | YTH domain containing 1                                         | 1.69001 | 8.65E-05  | 1.9118   | 4.58E-06   |
| A_52_P488666 | SUSD2             | sushi domain containing 2                                       | 1.69019 | 2.02E-05  | 2.07034  | 1.02E-07   |
| A_51_P355943 | MVD               | mevalonate (diphospho) decarboxylase                            | 1.6904  | 3.30E-07  | -1.66721 | 5.24E-07   |
| A_51_P249051 | PYCR2             | pyrroline-5-carboxylate reductase family, member 2              | 1.69087 | 1.14E-06  | -1.5593  | 1.51E-05   |
| A_52_P307180 |                   |                                                                 | 1.69104 | 0.0007366 | -1.54655 | 0.00390959 |
| A_52_P517508 | KLHL23/PHOSPHO2   | kelch-like family member 23                                     | 1.69129 | 8.13E-05  | -1.61546 | 0.00024242 |
| A_51_P458086 | TERF2             | telomeric repeat binding factor 2                               | 1.69216 | 0.0002942 | 1.62335  | 0.00070437 |
| A_52_P464193 | ILKAP             | integrin-linked kinase-associated serine/threonine phosphat     | 1.69299 | 0.0010913 | -1.83184 | 0.00025486 |
| A_51_P293688 | RAB32             | RAB32, member RAS oncogene family                               | 1.69682 | 0.0005963 | 4.95474  | 2.65E-12   |



|               |               |                                                              |         |           |          |            |
|---------------|---------------|--------------------------------------------------------------|---------|-----------|----------|------------|
| A_51_P179492  | FAM92A1       | family with sequence similarity 92, member A1                | 1.69984 | 2.11E-06  | -1.50653 | 8.40E-05   |
| A_51_P205106  | MLF1          | myeloid leukemia factor 1                                    | 1.70003 | 0.0001841 | -1.58226 | 0.00087774 |
| A_52_P283055  | SLC5A3        | solute carrier family 5 (sodium/myo-inositol cotransporter), | 1.7001  | 0.0042816 | 3.54418  | 4.50E-08   |
| A_52_P8953    | RP2           | retinitis pigmentosa 2 (X-linked recessive)                  | 1.70053 | 0.0001352 | -1.65871 | 0.0002372  |
| A_51_P354913  | FNDC5         | fibronectin type III domain containing 5                     | 1.70078 | 1.26E-05  | 1.87588  | 9.00E-07   |
| A_51_P216965  | FKBP10        | FK506 binding protein 10, 65 kDa                             | 1.70118 | 9.66E-06  | 5.73754  | 9.59E-17   |
| A_51_P256623  | PHTF1         | putative homeodomain transcription factor 1                  | 1.70141 | 2.57E-10  | 1.72899  | 1.34E-10   |
| A_51_P452280  | CMC4          | C-x(9)-C motif containing 4                                  | 1.70241 | 8.78E-05  | -1.8603  | 1.09E-05   |
| A_51_P325624  | HSBP1         | heat shock factor binding protein 1                          | 1.70271 | 4.17E-06  | 4.04947  | 6.90E-15   |
| A_51_P287606  | C16orf90      | chromosome 16 open reading frame 90                          | 1.70505 | 4.21E-07  | 2.04033  | 1.66E-09   |
| A_52_P348720  | RHOBTB3       | Rho-related BTB domain containing 3                          | 1.70528 | 4.09E-06  | -2.12834 | 8.69E-09   |
| A_52_P361081  | ARHGEF16      | Rho guanine nucleotide exchange factor (GEF) 16              | 1.70709 | 0.0001377 | 4.46404  | 7.61E-13   |
| A_51_P290399  | AI661453      | expressed sequence AI661453                                  | 1.70822 | 1.00E-05  | 1.50851  | 0.00030001 |
| A_52_P80404   | ENDOV         | endonuclease V                                               | 1.70886 | 0.0001532 | 1.6907   | 0.00019409 |
| A_51_P278266  | GLTPD2        | glycolipid transfer protein domain containing 2              | 1.70961 | 1.79E-06  | -2.84408 | 2.65E-12   |
| A_51_P350453  | PDK4          | pyruvate dehydrogenase kinase, isozyme 4                     | 1.70962 | 6.14E-05  | 3.73629  | 3.47E-12   |
| A_52_P559957  | MACROD1       | MACRO domain containing 1                                    | 1.71036 | 1.46E-06  | 2.37981  | 1.41E-10   |
| A_51_P179258  | KIF26B        | kinesin family member 26B                                    | 1.71107 | 0.0077441 | 2.57098  | 2.46E-05   |
| A_52_P683517  |               |                                                              | 1.71155 | 0.0002474 | 4.50779  | 2.40E-12   |
| A_52_P212336  | 2610005L07Rik | cadherin 11 pseudogene                                       | 1.71159 | 2.47E-09  | 1.5153   | 3.31E-07   |
| A_51_P140742  | ISLR          | immunoglobulin superfamily containing leucine-rich repeat    | 1.71189 | 0.0026719 | 2.54086  | 3.94E-06   |
| A_52_P123665  | VPS33A        | vacuolar protein sorting 33 homolog A (S. cerevisiae)        | 1.71277 | 2.41E-09  | 1.85253  | 1.34E-10   |
| A_51_P106488  | SPEG          | SPEG complex locus                                           | 1.71296 | 3.37E-05  | -2.6321  | 1.29E-09   |
| A_51_P434101  | HERPUD1       | homocysteine-inducible, endoplasmic reticulum stress-induc   | 1.71333 | 6.11E-06  | 1.71432  | 6.01E-06   |
| A_51_P346668  | IRF5          | interferon regulatory factor 5                               | 1.71342 | 5.21E-07  | 2.06568  | 1.82E-09   |
| A_52_P377326  | PLEKHB2       | pleckstrin homology domain containing, family B (evectins) i | 1.71531 | 2.20E-07  | 4.83897  | 4.85E-18   |
| A_51_P168792  | XYLB          | xylulokinase homolog (H. influenzae)                         | 1.71543 | 3.61E-05  | -1.607   | 0.00018217 |
| A_52_P220229  | PLEKHB2       | pleckstrin homology domain containing, family B (evectins) i | 1.71566 | 0.0003943 | 4.01886  | 4.30E-11   |
| A_51_P162894  | C16orf86      | chromosome 16 open reading frame 86                          | 1.71659 | 0.0009292 | -1.64912 | 0.00190469 |
| A_51_P406334  | DNLZ          | DNL-type zinc finger                                         | 1.71718 | 2.60E-05  | 1.7717   | 1.19E-05   |
| A_52_P539632  | PLXNA3        | plexin A3                                                    | 1.71882 | 0.0002165 | -3.06074 | 1.61E-09   |
| A_52_P421196  | LIPT2         | lipoyl(octanoyl) transferase 2 (putative)                    | 1.71884 | 3.38E-07  | -1.67501 | 7.82E-07   |
| A_51_P329733  | CSNK1G1       | casein kinase 1, gamma 1                                     | 1.71891 | 3.77E-05  | 1.5417   | 0.00054058 |
| A_51_P211488  | CPTP          | ceramide-1-phosphate transfer protein                        | 1.71982 | 1.15E-08  | 1.80095  | 2.22E-09   |
| A_52_P635250  | LRRC16A       | leucine rich repeat containing 16A                           | 1.72009 | 0.0053174 | -2.78516 | 4.03E-06   |
| A_52_P184257  | STEAP1        | six transmembrane epithelial antigen of the prostate 1       | 1.72032 | 2.06E-07  | 1.50192  | 2.02E-05   |
| A_52_P987564  | WDFY3         | WD repeat and FYVE domain containing 3                       | 1.72047 | 0.0003398 | -1.77191 | 0.0001868  |
| A_51_P304170  | RTP4          | receptor (chemosensory) transporter protein 4                | 1.72053 | 1.48E-05  | -3.38241 | 2.46E-12   |
| A_51_P223569  | DDX4          | DEAD (Asp-Glu-Ala-Asp) box polypeptide 4                     | 1.72063 | 0.000129  | 2.18395  | 6.51E-07   |
| A_52_P594656  |               |                                                              | 1.72079 | 0.0011272 | 9.78748  | 4.32E-15   |
| A_51_P309850  | EPHB6         | EPH receptor B6                                              | 1.72406 | 0.0004327 | 1.82779  | 0.00013621 |
| A_52_P262096  | CCDC93        | coiled-coil domain containing 93                             | 1.72494 | 0.0027951 | -1.70863 | 0.00323195 |
| A_52_P1124470 |               |                                                              | 1.72495 | 5.62E-05  | -3.71962 | 4.71E-12   |
| A_52_P134341  | 2010110K18Rik | RIKEN cDNA 2010110K18 gene                                   | 1.72508 | 0.0002309 | -2.38217 | 2.69E-07   |
| A_51_P400366  | RHBG          | Rh family, B glycoprotein (gene/pseudogene)                  | 1.72917 | 7.18E-10  | 5.07042  | 1.35E-21   |
| A_51_P236846  | F3            | coagulation factor III (thromboplastin, tissue factor)       | 1.72973 | 2.13E-05  | -1.72919 | 2.15E-05   |
| A_52_P297212  | ZKSCAN3       | zinc finger with KRAB and SCAN domains 3                     | 1.73058 | 6.97E-05  | 3.05834  | 2.93E-10   |
| A_51_P141850  | HS1BP3        | HCLS1 binding protein 3                                      | 1.73121 | 0.0026419 | 1.6177   | 0.00732367 |
| A_52_P544556  | HSBP1         | heat shock factor binding protein 1                          | 1.73123 | 2.65E-09  | 1.91893  | 6.70E-11   |
| A_51_P340947  | SELO          | selenoprotein O                                              | 1.73228 | 1.52E-05  | 3.01788  | 3.28E-11   |
| A_51_P503494  | ARC           | activity-regulated cytoskeleton-associated protein           | 1.73251 | 9.53E-10  | 4.79069  | 5.54E-21   |
| A_52_P216874  | MMGT1         | membrane magnesium transporter 1                             | 1.73308 | 0.0009226 | 1.6563   | 0.00204678 |
| A_51_P484500  | PMFBP1        | polyamine modulated factor 1 binding protein 1               | 1.7338  | 3.03E-05  | -2.3016  | 3.39E-08   |

|              |               |                                                               |         |           |          |            |
|--------------|---------------|---------------------------------------------------------------|---------|-----------|----------|------------|
| A_52_P488092 | KIAA1217      | KIAA1217                                                      | 1.73496 | 2.36E-06  | -1.82235 | 5.77E-07   |
| A_52_P324530 | ING2          | inhibitor of growth family, member 2                          | 1.73628 | 1.57E-09  | -2.11951 | 1.63E-12   |
| A_51_P321374 | PLPP7         | phospholipid phosphatase 7 (inactive)                         | 1.73721 | 5.31E-07  | 1.53525  | 2.65E-05   |
| A_52_P434375 | DOCK1         | dedicator of cytokinesis 1                                    | 1.73859 | 1.40E-06  | 5.13461  | 5.94E-17   |
| A_51_P296027 | RAB12         | RAB12, member RAS oncogene family                             | 1.73885 | 0.0013264 | 2.23396  | 1.69E-05   |
| A_52_P574685 | MED14         | mediator complex subunit 14                                   | 1.73927 | 0.0060905 | 2.30235  | 0.00011762 |
| A_52_P257026 |               |                                                               | 1.73955 | 0.007231  | -1.96607 | 0.00142841 |
| A_51_P508580 | TCF15         | transcription factor 15 (basic helix-loop-helix)              | 1.74002 | 2.35E-07  | -1.76308 | 1.54E-07   |
| A_51_P248935 | TERC          | telomerase RNA component                                      | 1.74047 | 0.0033232 | 3.74146  | 2.52E-08   |
| A_51_P157976 | MMAB          | methylmalonic aciduria (cobalamin deficiency) cblB type       | 1.74132 | 1.67E-06  | -2.10554 | 8.04E-09   |
| A_52_P240499 |               |                                                               | 1.74265 | 0.0049863 | -1.73833 | 0.00515806 |
| A_52_P672960 | CAMK4         | calcium/calmodulin-dependent protein kinase IV                | 1.74343 | 4.28E-05  | 9.39632  | 7.75E-18   |
| A_52_P460584 | TNFRSF25      | tumor necrosis factor receptor superfamily, member 25         | 1.7442  | 0.0001986 | -4.17476 | 1.15E-11   |
| A_52_P185255 | KCNIP3        | Kv channel interacting protein 3, calsenuin                   | 1.74439 | 4.36E-06  | 2.50546  | 3.93E-10   |
| A_51_P167105 | B3GALT4       | UDP-Gal:betaGlcNAc beta 1,3-galactosyltransferase, polypep    | 1.74498 | 1.36E-09  | 2.14044  | 1.27E-12   |
| A_52_P71869  | PLEC          | plectin                                                       | 1.74573 | 0.0005056 | 2.22543  | 4.79E-06   |
| A_51_P162760 | ZNF623        | zinc finger protein 623                                       | 1.74684 | 8.26E-09  | 3.36666  | 1.11E-16   |
| A_52_P108447 | GLIS2         | GLIS family zinc finger 2                                     | 1.74715 | 2.07E-07  | -1.62113 | 2.36E-06   |
| A_51_P473277 | TSPAN6        | tetraspanin 6                                                 | 1.74751 | 6.98E-06  | 5.34009  | 5.68E-16   |
| A_52_P535782 | MRI1          | methylthioribose-1-phosphate isomerase 1                      | 1.7481  | 1.63E-07  | -2.02409 | 1.77E-09   |
| A_52_P117197 | EPC1          | enhancer of polycomb homolog 1 (Drosophila)                   | 1.75117 | 0.0013566 | 1.60533  | 0.00554148 |
| A_52_P663585 | SEPT10        | septin 10                                                     | 1.75164 | 0.0006147 | -3.01063 | 2.91E-08   |
| A_52_P244109 | XIRP2         | xin actin binding repeat containing 2                         | 1.75246 | 0.0056487 | 6.89347  | 4.82E-11   |
| A_52_P306351 | ASPH          | aspartate beta-hydroxylase                                    | 1.75247 | 7.68E-08  | -3.7804  | 2.45E-16   |
| A_52_P251036 |               |                                                               | 1.7532  | 1.86E-07  | 2.52429  | 5.87E-12   |
| A_52_P638798 | MIPOL1        | mirror-image polydactyly 1                                    | 1.75444 | 0.0017131 | -1.66038 | 0.00408192 |
| A_52_P323975 | FARSA         | phenylalanyl-tRNA synthetase, alpha subunit                   | 1.75455 | 1.05E-07  | 1.5787   | 3.59E-06   |
| A_51_P326091 | CFLAR         | CASP8 and FADD-like apoptosis regulator                       | 1.75469 | 0.0012281 | -2.09492 | 5.82E-05   |
| A_52_P510107 | NUDT15        | nudix (nucleoside diphosphate linked moiety X)-type motif 1   | 1.75506 | 0.0003629 | -1.72745 | 0.00049302 |
| A_51_P519404 | 1110065P20Rik | RIKEN cDNA 1110065P20 gene                                    | 1.75587 | 9.06E-05  | 1.69254  | 0.00020358 |
| A_51_P204295 | PTS           | 6-pyruvoyltetrahydropterin synthase                           | 1.75632 | 9.03E-10  | -2.12884 | 1.24E-12   |
| A_52_P514488 | EXOC3L1       | exocyst complex component 3-like 1                            | 1.75632 | 2.74E-07  | -5.24076 | 5.67E-18   |
| A_52_P137361 | TMC4          | transmembrane channel-like 4                                  | 1.75717 | 7.29E-06  | -2.11126 | 6.37E-08   |
| A_52_P21574  | PDLIM7        | PDZ and LIM domain 7 (enigma)                                 | 1.7572  | 2.49E-06  | -1.96825 | 1.08E-07   |
| A_51_P150175 | UBE4A         | ubiquitination factor E4A                                     | 1.75745 | 5.27E-06  | -1.52808 | 0.00023385 |
| A_51_P439520 | PACS2         | phosphofurin acidic cluster sorting protein 2                 | 1.75768 | 3.39E-12  | 1.54255  | 1.17E-09   |
| A_52_P238816 | PPT2          | palmitoyl-protein thioesterase 2                              | 1.75816 | 2.02E-07  | 1.57658  | 6.88E-06   |
| A_51_P305320 | B4GAT1        | beta-1,4-glucuronyltransferase 1                              | 1.76036 | 2.05E-06  | 2.79226  | 1.64E-11   |
| A_52_P20906  | TWIST1        | twist family bHLH transcription factor 1                      | 1.76051 | 0.0004848 | 1.94484  | 7.39E-05   |
| A_51_P257419 | LHX2          | LIM homeobox 2                                                | 1.76095 | 3.40E-05  | -1.72537 | 5.53E-05   |
| A_51_P256344 | ANXA4         | annexin A4                                                    | 1.76097 | 7.39E-06  | -1.8895  | 1.17E-06   |
| A_51_P434036 | GSAP          | gamma-secretase activating protein                            | 1.76115 | 0.0075291 | 1.82474  | 0.00482495 |
| A_51_P243435 | HSD17B1       | hydroxysteroid (17-beta) dehydrogenase 1                      | 1.7613  | 1.37E-05  | 15.8925  | 5.22E-21   |
| A_52_P58359  | TLX1          | T-cell leukemia homeobox 1                                    | 1.76212 | 0.0023322 | -2.33661 | 2.65E-05   |
| A_51_P340226 | SH3YL1        | SH3 and SYLF domain containing 1                              | 1.76246 | 4.90E-09  | 2.31816  | 7.97E-13   |
| A_51_P317673 | ZNF764        | zinc finger protein 764                                       | 1.76263 | 4.29E-13  | 1.53869  | 2.28E-10   |
| A_52_P653585 | GNAI1         | guanine nucleotide binding protein (G protein), alpha inhibit | 1.76531 | 0.0075387 | 1.8489   | 0.00422179 |
| A_52_P42221  | SGPP1         | sphingosine-1-phosphate phosphatase 1                         | 1.76551 | 0.0018235 | 2.22491  | 4.24E-05   |
| A_51_P515768 | PDLIM7        | PDZ and LIM domain 7 (enigma)                                 | 1.76583 | 5.02E-07  | -2.1386  | 2.04E-09   |
| A_51_P451032 | ANXA3         | annexin A3                                                    | 1.76888 | 2.44E-06  | 4.74985  | 1.10E-15   |
| A_52_P561293 | 9430037G07Rik | RIKEN cDNA 9430037G07 gene                                    | 1.76952 | 8.92E-05  | -2.417   | 1.08E-07   |
| A_52_P147816 | MORC4         | MORC family CW-type zinc finger 4                             | 1.7704  | 0.0052263 | 2.86317  | 5.72E-06   |
| A_51_P408644 | EIF2AK4       | eukaryotic translation initiation factor 2 alpha kinase 4     | 1.77122 | 0.0023719 | -2.40665 | 1.92E-05   |

|               |                |                                                              |         |           |          |            |
|---------------|----------------|--------------------------------------------------------------|---------|-----------|----------|------------|
| A_51_P145041  | LRP8           | low density lipoprotein receptor-related protein 8, apolipop | 1.77134 | 3.14E-05  | -3.43135 | 2.19E-11   |
| A_52_P544555  | HSBP1          | heat shock factor binding protein 1                          | 1.77227 | 1.42E-08  | 2.00578  | 2.48E-10   |
| A_52_P586141  | ADCY7          | adenylate cyclase 7                                          | 1.77248 | 4.26E-05  | 3.71952  | 8.90E-12   |
| A_51_P188381  | LRRC58         | leucine rich repeat containing 58                            | 1.77299 | 1.38E-08  | -1.79044 | 9.89E-09   |
| A_52_P1036902 |                |                                                              | 1.77317 | 0.0010797 | -2.37319 | 7.09E-06   |
| A_52_P421918  | HELQ           | helicase, POLQ-like                                          | 1.77471 | 0.0002087 | 2.29893  | 1.12E-06   |
| A_51_P348592  | SLC38A7        | solute carrier family 38, member 7                           | 1.77544 | 8.59E-08  | 1.5009   | 2.32E-05   |
| A_51_P416408  | TMC4           | transmembrane channel-like 4                                 | 1.77607 | 5.41E-06  | -2.23997 | 1.46E-08   |
| A_52_P576280  | POM121/POM121C | POM121 transmembrane nucleoporin                             | 1.7767  | 0.0001128 | 2.01264  | 7.91E-06   |
| A_52_P147733  |                |                                                              | 1.77815 | 0.0064403 | 2.97763  | 5.67E-06   |
| A_51_P294765  | FAM174A        | family with sequence similarity 174, member A                | 1.77842 | 6.57E-08  | 1.79745  | 4.66E-08   |
| A_51_P299107  | CHST6          | carbohydrate (N-acetylglucosamine 6-O) sulfotransferase 6    | 1.78002 | 5.59E-05  | 2.30938  | 1.75E-07   |
| A_52_P21822   | TIA1           | TIA1 cytotoxic granule-associated RNA binding protein        | 1.78022 | 9.04E-05  | -2.47822 | 8.02E-08   |
| A_52_P500673  |                |                                                              | 1.7811  | 2.99E-07  | 1.66125  | 2.57E-06   |
| A_51_P423743  | CLDN6          | claudin 6                                                    | 1.78128 | 0.0042015 | 1.68182  | 0.00901473 |
| A_52_P149391  | USP40          | ubiquitin specific peptidase 40                              | 1.78175 | 7.81E-05  | 1.86018  | 3.05E-05   |
| A_51_P195215  | FAM149A        | family with sequence similarity 149, member A                | 1.78444 | 0.0014074 | 1.73322  | 0.00223316 |
| A_52_P366653  | HNRNPH3        | heterogeneous nuclear ribonucleoprotein H3 (2H9)             | 1.78544 | 1.91E-05  | -1.67505 | 8.95E-05   |
| A_51_P283563  | ZBTB26         | zinc finger and BTB domain containing 26                     | 1.78564 | 4.10E-05  | 1.69076  | 0.00014282 |
| A_52_P337126  | BVES           | blood vessel epicardial substance                            | 1.78789 | 0.0007681 | 2.25612  | 1.27E-05   |
| A_52_P429749  | Tmem115        | transmembrane protein 115                                    | 1.78918 | 2.43E-09  | 2.44924  | 1.43E-13   |
| A_52_P260747  | ZC3HAV1L       | zinc finger CCCH-type, antiviral 1-like                      | 1.78931 | 3.47E-05  | -1.78526 | 3.65E-05   |
| A_51_P220407  | RNPEPL1        | arginyl aminopeptidase (aminopeptidase B)-like 1             | 1.79001 | 1.47E-12  | 2.17714  | 1.20E-15   |
| A_51_P278103  | STAMPB         | STAM binding protein                                         | 1.79013 | 0.0003758 | -1.54015 | 0.00565017 |
| A_51_P454993  | TMCC2          | transmembrane and coiled-coil domain family 2                | 1.79213 | 0.0051366 | 2.42017  | 8.28E-05   |
| A_52_P80021   | CMTM7          | CKLF-like MARVEL transmembrane domain containing 7           | 1.79309 | 1.66E-05  | -1.57643 | 0.00037299 |
| A_51_P488928  | CYTH3          | cytohesin 3                                                  | 1.79356 | 1.42E-06  | 1.74196  | 3.23E-06   |
| A_52_P590936  | MTHFR          | methylenetetrahydrofolate reductase (NAD(P)H)                | 1.79361 | 0.000594  | 3.8054   | 1.32E-09   |
| A_52_P482715  | LRRC58         | leucine rich repeat containing 58                            | 1.79414 | 3.46E-08  | -2.07351 | 3.90E-10   |
| A_52_P342963  | THEM6          | thioesterase superfamily member 6                            | 1.79423 | 7.47E-05  | 1.50533  | 0.00303959 |
| A_52_P643165  | SAMD4A         | sterile alpha motif domain containing 4A                     | 1.79456 | 0.0031805 | -4.07335 | 1.92E-08   |
| A_52_P543460  | PBX1           | pre-B-cell leukemia homeobox 1                               | 1.79559 | 2.82E-05  | -1.83869 | 1.62E-05   |
| A_51_P126177  | MAP1LC3B       | microtubule-associated protein 1 light chain 3 beta          | 1.79647 | 1.39E-09  | 1.66444  | 2.29E-08   |
| A_51_P345685  | HSPB11         | heat shock protein family B (small), member 11               | 1.79877 | 2.80E-07  | 2.09636  | 3.41E-09   |
| A_52_P625672  | LYSMD4         | LysM, putative peptidoglycan-binding, domain containing 4    | 1.80072 | 2.88E-05  | 2.29048  | 1.22E-07   |
| A_51_P359549  | FEM1C          | fem-1 homolog c (C. elegans)                                 | 1.80084 | 1.25E-11  | -1.80613 | 1.12E-11   |
| A_51_P357744  | JUND           | jun D proto-oncogene                                         | 1.80175 | 2.00E-05  | 1.62379  | 0.00023543 |
| A_52_P86534   | INPP5E         | inositol polyphosphate-5-phosphatase E                       | 1.80218 | 6.91E-11  | 2.4532   | 3.03E-15   |
| A_51_P381387  | POMT2          | protein-O-mannosyltransferase 2                              | 1.80224 | 2.53E-06  | 2.83175  | 4.10E-11   |
| A_52_P532982  | GDF15          | growth differentiation factor 15                             | 1.80244 | 1.06E-06  | 10.2805  | 1.79E-20   |
| A_52_P491569  | C15orf39       | chromosome 15 open reading frame 39                          | 1.80296 | 2.06E-07  | 2.00602  | 8.92E-09   |
| A_51_P294288  | RHBDD2         | rhomboid domain containing 2                                 | 1.804   | 5.27E-06  | 2.90416  | 7.15E-11   |
| A_51_P300216  | CBFB           | core-binding factor, beta subunit                            | 1.80413 | 3.90E-05  | 1.74211  | 8.58E-05   |
| A_51_P400498  | WHSC1          | Wolf-Hirschhorn syndrome candidate 1                         | 1.80448 | 2.16E-07  | -2.68469 | 5.09E-12   |
| A_51_P406306  | HECW2          | HECT, C2 and WW domain containing E3 ubiquitin protein liq   | 1.80647 | 0.0002087 | 5.36222  | 1.23E-12   |
| A_51_P287617  | PLEKHH1        | pleckstrin homology domain containing, family H (with MyTI   | 1.80755 | 1.44E-08  | -2.42634 | 2.32E-12   |
| A_51_P333859  | CLVS2          | clavesin 2                                                   | 1.80954 | 0.0081319 | 2.87943  | 2.23E-05   |
| A_51_P157953  | SOGA3          | SOGA family member 3                                         | 1.81085 | 3.07E-05  | -2.61164 | 9.74E-09   |
| A_51_P497263  | MAP6           | microtubule-associated protein 6                             | 1.81207 | 0.0088672 | 2.05101  | 0.00204565 |
| A_51_P363801  | PGPEP1         | pyroglutamyl-peptidase I                                     | 1.81407 | 7.04E-11  | 2.39872  | 7.72E-15   |
| A_51_P150845  | TCERG1L        | transcription elongation regulator 1-like                    | 1.8146  | 3.31E-06  | -3.04858 | 1.67E-11   |
| A_52_P74637   | Gm4983         | predicted gene 4983                                          | 1.81474 | 1.35E-05  | 1.6201   | 0.00020814 |
| A_52_P389784  | ITFG1          | integrin alpha FG-GAP repeat containing 1                    | 1.81566 | 0.0028783 | -1.64593 | 0.0108599  |

|              |                |                                                             |         |           |          |            |
|--------------|----------------|-------------------------------------------------------------|---------|-----------|----------|------------|
| A_52_P58066  | Gm13791        | predicted gene 13791                                        | 1.81608 | 1.02E-06  | 1.77489  | 1.93E-06   |
| A_52_P635271 | BTBD6          | BTB (POZ) domain containing 6                               | 1.81701 | 1.70E-12  | 2.28284  | 5.96E-16   |
| A_51_P381784 | EXOSC7         | exosome component 7                                         | 1.81743 | 9.51E-06  | -1.54921 | 0.00047961 |
| A_51_P368074 | PGM1           | phosphoglucomutase 1                                        | 1.8184  | 5.41E-12  | -3.0629  | 8.13E-19   |
| A_52_P256569 | DBNDD2         | dysbindin (dystrobrevin binding protein 1) domain containin | 1.82109 | 1.50E-05  | 2.16193  | 2.69E-07   |
| A_51_P454152 | ERCC6          | excision repair cross-complementation group 6               | 1.8211  | 3.16E-06  | 2.07964  | 1.05E-07   |
| A_51_P359822 | SFTPD          | surfactant protein D                                        | 1.82136 | 2.32E-06  | 1.9309   | 4.97E-07   |
| A_52_P218440 | 4930486L24Rik  | RIKEN cDNA 4930486L24 gene                                  | 1.82233 | 0.0089367 | 19.2448  | 4.74E-14   |
| A_52_P325265 | NDUFAF4        | NADH dehydrogenase (ubiquinone) complex I, assembly fact    | 1.82295 | 0.0063819 | 1.84535  | 0.0055042  |
| A_51_P416660 | CDC14B         | cell division cycle 14B                                     | 1.82357 | 4.57E-10  | -1.76855 | 1.38E-09   |
| A_52_P622244 | C15orf59       | chromosome 15 open reading frame 59                         | 1.8248  | 6.12E-05  | 3.96635  | 1.75E-11   |
| A_51_P257371 | ITGB3BP        | integrin beta 3 binding protein (beta3-endonexin)           | 1.82496 | 0.0004284 | 1.74692  | 0.00092682 |
| A_51_P441469 | JMY            | junction mediating and regulatory protein, p53 cofactor     | 1.82626 | 0.0003875 | 1.93629  | 0.00013448 |
| A_52_P507169 |                |                                                             | 1.82628 | 0.0031936 | 2.18933  | 0.00024773 |
| A_51_P159194 | JUNB           | jun B proto-oncogene                                        | 1.82804 | 1.91E-08  | 1.67508  | 3.42E-07   |
| A_51_P312748 | OXSM           | 3-oxoacyl-ACP synthase, mitochondrial                       | 1.82903 | 8.96E-07  | 2.37897  | 9.45E-10   |
| A_51_P392223 | PCNXL4         | pecanex-like 4 (Drosophila)                                 | 1.82969 | 1.07E-05  | 2.878    | 4.07E-10   |
| A_52_P427544 | TERF2          | telomeric repeat binding factor 2                           | 1.83285 | 0.0013385 | 2.2015   | 7.41E-05   |
| A_52_P323936 | TBC1D12        | TBC1 domain family, member 12                               | 1.83325 | 0.000644  | 2.10272  | 6.14E-05   |
| A_51_P285065 | TOLLIP         | toll interacting protein                                    | 1.83502 | 4.94E-05  | 1.5412   | 0.0019787  |
| A_52_P359819 | NTF4           | neurotrophin 4                                              | 1.83508 | 1.47E-06  | 2.65513  | 1.56E-10   |
| A_52_P683413 | F3             | coagulation factor III (thromboplastin, tissue factor)      | 1.83555 | 3.99E-05  | -1.51184 | 0.00255818 |
| A_51_P385010 | RGP1           | RGP1 homolog, RAB6A GEF complex partner 1                   | 1.83561 | 0.0033888 | 1.91765  | 0.00187866 |
| A_52_P322181 | ADRB1          | adrenoceptor beta 1                                         | 1.83649 | 0.0002099 | 3.10532  | 1.21E-08   |
| A_52_P656860 | SLC25A30       | solute carrier family 25, member 30                         | 1.83652 | 0.0002119 | -1.61167 | 0.00238281 |
| A_52_P415155 | WNT6           | wingless-type MMTV integration site family, member 6        | 1.83931 | 8.99E-05  | 13.7483  | 6.41E-18   |
| A_51_P123623 | PTPDC1         | protein tyrosine phosphatase domain containing 1            | 1.84006 | 0.0069798 | 11.7034  | 2.46E-12   |
| A_51_P265465 | ABHD3          | abhydrolase domain containing 3                             | 1.84072 | 0.0001605 | -1.60421 | 0.00218039 |
| A_51_P490955 | ZNF784         | zinc finger protein 784                                     | 1.84259 | 0.0003623 | 1.52195  | 0.00945232 |
| A_51_P476601 | LY96           | lymphocyte antigen 96                                       | 1.84407 | 0.0009258 | 1.94858  | 0.00038075 |
| A_52_P417694 | IKBIP          | IKBKB interacting protein                                   | 1.84608 | 6.88E-05  | 3.59022  | 1.75E-10   |
| A_51_P368142 | ANKRD11        | ankyrin repeat domain 11                                    | 1.84651 | 5.14E-07  | 2.27958  | 1.89E-09   |
| A_52_P429723 | MME            | membrane metallo-endopeptidase                              | 1.84667 | 6.77E-05  | -1.60903 | 0.00114028 |
| A_51_P424905 | ZNF384         | zinc finger protein 384                                     | 1.84733 | 6.97E-05  | -1.62617 | 0.00094878 |
| A_52_P618187 | MRS2           | MRS2 magnesium transporter                                  | 1.84743 | 7.12E-05  | 2.78326  | 1.86E-08   |
| A_51_P397296 | MARVELD3       | MARVEL domain containing 3                                  | 1.84778 | 5.86E-05  | 1.51116  | 0.00359781 |
| A_51_P420726 | MBLAC2         | metallo-beta-lactamase domain containing 2                  | 1.85073 | 2.83E-08  | -1.78641 | 8.60E-08   |
| A_52_P119350 | 4732419C18Rik  | RIKEN cDNA 4732419C18 gene                                  | 1.85151 | 0.0015449 | -3.73329 | 3.60E-08   |
| A_52_P451355 | ST6GALNAC3     | ST6 (alpha-N-acetyl-neuraminyl-2,3-beta-galactosyl-1,3)-N-a | 1.85153 | 3.48E-09  | -4.4842  | 1.93E-18   |
| A_51_P387473 | RAB13          | RAB13, member RAS oncogene family                           | 1.85206 | 3.83E-05  | -3.84461 | 2.27E-11   |
| A_51_P334490 | KIAA0513       | KIAA0513                                                    | 1.85383 | 0.0010423 | 2.36491  | 2.10E-05   |
| A_51_P368285 | FAM101A/ZNF664 | family with sequence similarity 101, member A               | 1.85389 | 0.0003751 | 26.8943  | 5.63E-19   |
| A_52_P121978 | TMEM47         | transmembrane protein 47                                    | 1.85545 | 4.31E-05  | -1.64993 | 0.00052111 |
| A_51_P381247 | PDZD11         | PDZ domain containing 11                                    | 1.85639 | 8.76E-07  | 2.20519  | 9.80E-09   |
| A_51_P252947 | MAPK8IP1       | mitogen-activated protein kinase 8 interacting protein 1    | 1.85786 | 0.000357  | -1.92696 | 0.00018704 |
| A_51_P178022 | PLEKHG2        | pleckstrin homology domain containing, family G (with RhoC  | 1.86064 | 4.10E-09  | -2.05104 | 1.91E-10   |
| A_52_P85200  | CLCN4          | chloride channel, voltage-sensitive 4                       | 1.86117 | 4.94E-08  | 1.80448  | 1.27E-07   |
| A_51_P333949 | INTS7          | integrator complex subunit 7                                | 1.86146 | 5.47E-11  | -1.85995 | 5.63E-11   |
| A_52_P159077 | SIAE           | sialic acid acetyltransferase                               | 1.86146 | 1.97E-06  | -1.53938 | 0.00028377 |
| A_52_P495553 | ZBTB10         | zinc finger and BTB domain containing 10                    | 1.86177 | 2.89E-06  | 4.53663  | 2.61E-14   |
| A_51_P218216 | CNOT1          | CCR4-NOT transcription complex, subunit 1                   | 1.86202 | 1.24E-09  | 1.60418  | 2.50E-07   |
| A_51_P171616 | WNT10A         | wingless-type MMTV integration site family, member 10A      | 1.86206 | 0.0047644 | 40.4357  | 4.43E-17   |
| A_51_P465582 | HDHD3          | haloacid dehalogenase-like hydrolase domain containing 3    | 1.86228 | 1.93E-05  | 2.14099  | 8.56E-07   |

|               |                    |                                                                   |         |           |          |            |
|---------------|--------------------|-------------------------------------------------------------------|---------|-----------|----------|------------|
| A_51_P212030  | ATP6V0E2           | ATPase, H <sup>+</sup> transporting V0 subunit e2                 | 1.8625  | 2.38E-06  | 3.24695  | 7.80E-12   |
| A_51_P405089  | LPCAT1             | lysophosphatidylcholine acyltransferase 1                         | 1.86292 | 2.37E-08  | -1.61043 | 2.58E-06   |
| A_52_P559034  | KLHL42             | kelch-like family member 42                                       | 1.86322 | 9.87E-12  | 1.52756  | 3.33E-08   |
| A_51_P514379  | ZIK1               | zinc finger protein interacting with K protein 1                  | 1.86596 | 8.95E-05  | 1.79134  | 0.00020174 |
| A_52_P151116  | KCNAB3             | potassium channel, voltage gated subfamily A regulatory be        | 1.8667  | 8.08E-06  | -4.0379  | 1.03E-12   |
| A_51_P169516  | PPP1R3D            | protein phosphatase 1, regulatory subunit 3D                      | 1.86799 | 0.0042267 | 19.8862  | 7.69E-15   |
| A_51_P497295  | QPCT               | glutaminyl-peptide cyclotransferase                               | 1.8707  | 7.26E-06  | 6.59659  | 5.54E-16   |
| A_51_P213205  | FAM131A            | family with sequence similarity 131, member A                     | 1.87142 | 1.73E-05  | 2.50114  | 3.06E-08   |
| A_51_P359800  | CLEC11A            | C-type lectin domain family 11, member A                          | 1.87221 | 0.0002605 | 2.12855  | 2.54E-05   |
| A_51_P425490  | AGPAT3             | 1-acylglycerol-3-phosphate O-acyltransferase 3                    | 1.8728  | 2.71E-14  | 2.0805   | 5.54E-16   |
| A_51_P231001  | SFT2D3             | SFT2 domain containing 3                                          | 1.87294 | 0.0075538 | 3.48548  | 3.80E-06   |
| A_51_P282883  | RAB4A              | RAB4A, member RAS oncogene family                                 | 1.87419 | 2.77E-09  | -1.62638 | 3.58E-07   |
| A_51_P170807  |                    |                                                                   | 1.87514 | 5.79E-09  | 1.69791  | 1.54E-07   |
| A_52_P92905   | CD99L2             | CD99 molecule-like 2                                              | 1.87544 | 3.81E-06  | 1.80609  | 9.69E-06   |
| A_51_P449171  | BIRC3              | baculoviral IAP repeat containing 3                               | 1.87633 | 1.78E-06  | -1.64738 | 5.25E-05   |
| A_52_P49321   | ADAMTS9            | ADAM metalloproteinase with thrombospondin type 1 motif,          | 1.87695 | 3.08E-05  | -6.10712 | 2.30E-14   |
| A_51_P222453  | Tmem254a (includet | transmembrane protein 254a                                        | 1.87796 | 6.84E-07  | -1.89003 | 5.76E-07   |
| A_51_P318012  | RAB12              | RAB12, member RAS oncogene family                                 | 1.87986 | 0.0037524 | 2.15954  | 0.00061696 |
| A_51_P352381  | DHRS4              | dehydrogenase/reductase (SDR family) member 4                     | 1.87991 | 1.67E-07  | -2.30987 | 6.48E-10   |
| A_52_P818995  | NEK1               | NIMA-related kinase 1                                             | 1.87995 | 0.0011587 | -3.12898 | 4.36E-07   |
| A_51_P317076  | USE1               | unconventional SNARE in the ER 1 homolog ( <i>S. cerevisiae</i> ) | 1.88018 | 3.95E-07  | -1.9607  | 1.26E-07   |
| A_51_P511899  | MTHFSD             | methenyltetrahydrofolate synthetase domain containing             | 1.88076 | 6.55E-06  | 5.62484  | 5.37E-15   |
| A_52_P553673  | TTC17              | tetratricopeptide repeat domain 17                                | 1.8812  | 0.0005443 | 7.85971  | 3.62E-13   |
| A_51_P432538  | H2-T22             | histocompatibility 2, T region locus 22                           | 1.88213 | 3.20E-06  | -2.91576 | 1.49E-10   |
| A_52_P447985  | PGPEP1             | pyroglutamyl-peptidase I                                          | 1.88252 | 1.05E-10  | 2.07916  | 3.82E-12   |
| A_51_P249250  | UBXN1              | UBX domain protein 1                                              | 1.88501 | 5.07E-08  | 3.64885  | 6.10E-15   |
| A_52_P234729  | PKD2               | polycystic kidney disease 2 (autosomal dominant)                  | 1.88531 | 3.17E-08  | -1.52587 | 2.54E-05   |
| A_52_P16320   | TMEM106B           | transmembrane protein 106B                                        | 1.88732 | 0.0003437 | 1.7078   | 0.00187288 |
| A_51_P377948  | Gimap9             | GTPase, IMAP family member 9                                      | 1.88898 | 1.39E-05  | 1.94314  | 7.35E-06   |
| A_51_P346045  | Gtf2ird2           | GTF2I repeat domain containing 2                                  | 1.89024 | 2.64E-10  | -1.91245 | 1.78E-10   |
| A_51_P149714  | MS4A6A             | membrane-spanning 4-domains, subfamily A, member 6A               | 1.89062 | 0.0004983 | 1.69322  | 0.00296304 |
| A_52_P153957  | BLOC1S6            | biogenesis of lysosomal organelles complex-1, subunit 6, pal      | 1.89311 | 1.29E-07  | 2.76055  | 8.42E-12   |
| A_51_P356620  | RAB39B             | RAB39B, member RAS oncogene family                                | 1.8942  | 0.005552  | 10.1759  | 1.35E-11   |
| A_52_P1067757 | NUDT6              | nudix (nucleoside diphosphate linked moiety X)-type motif 6       | 1.8946  | 0.0011006 | 3.28228  | 2.39E-07   |
| A_51_P464300  | GDF1               | growth differentiation factor 1                                   | 1.89474 | 1.64E-05  | -2.41273 | 8.72E-08   |
| A_51_P282667  | HEXA               | hexosaminidase A (alpha polypeptide)                              | 1.89522 | 5.78E-05  | 1.94136  | 3.55E-05   |
| A_52_P265666  | FYCO1              | FYVE and coiled-coil domain containing 1                          | 1.89543 | 0.0002515 | -2.56893 | 1.12E-06   |
| A_51_P466448  | CSRNP2             | cysteine-serine-rich nuclear protein 2                            | 1.8975  | 3.36E-08  | 1.97547  | 1.03E-08   |
| A_52_P554594  | TFAP2E             | transcription factor AP-2 epsilon (activating enhancer bindin     | 1.89785 | 0.0034869 | 4.74276  | 1.92E-08   |
| A_51_P181785  | AI413194           | expressed sequence AI413194                                       | 1.90051 | 1.54E-05  | 3.30508  | 1.84E-10   |
| A_51_P456366  | PARD6A             | par-6 family cell polarity regulator alpha                        | 1.90066 | 2.06E-05  | 1.63135  | 0.00055808 |
| A_51_P281835  | INF2               | inverted formin, FH2 and WH2 domain containing                    | 1.9013  | 1.20E-06  | 4.92696  | 4.11E-15   |
| A_51_P392214  | PCNXL4             | pecanex-like 4 ( <i>Drosophila</i> )                              | 1.90132 | 1.49E-07  | 2.87561  | 4.73E-12   |
| A_51_P348804  | AMOTL2             | angiominin like 2                                                 | 1.9023  | 5.93E-08  | 3.47564  | 2.77E-14   |
| A_51_P146701  | NSDHL              | NAD(P) dependent steroid dehydrogenase-like                       | 1.90388 | 7.33E-05  | -1.90495 | 7.24E-05   |
| A_51_P392209  | ZBTB6              | zinc finger and BTB domain containing 6                           | 1.90404 | 4.77E-05  | -2.0614  | 9.46E-06   |
| A_51_P276479  | 4930486L24Rik      | RIKEN cDNA 4930486L24 gene                                        | 1.90409 | 0.0003242 | 17.9074  | 3.81E-17   |
| A_51_P381029  | LRRFIP1            | leucine rich repeat (in FLII) interacting protein 1               | 1.9042  | 4.99E-06  | 2.76827  | 1.18E-09   |
| A_52_P365011  | FES                | FES proto-oncogene, tyrosine kinase                               | 1.90471 | 1.62E-06  | -1.58112 | 0.00018798 |
| A_52_P318438  | NAB1               | NGFI-A binding protein 1 (EGR1 binding protein 1)                 | 1.90661 | 3.98E-05  | 2.55491  | 1.07E-07   |
| A_52_P21550   | GCNT1              | glucosaminyl (N-acetyl) transferase 1, core 2                     | 1.90662 | 1.99E-06  | 2.47431  | 4.08E-09   |
| A_51_P288618  | DUSP11             | dual specificity phosphatase 11 (RNA/RNP complex 1-interac        | 1.90827 | 5.58E-08  | 1.58089  | 1.63E-05   |
| A_51_P258435  | ZDHHC3             | zinc finger, DHHC-type containing 3                               | 1.90854 | 1.27E-06  | -1.67441 | 3.72E-05   |

|               |                  |                                                                          |         |           |          |            |
|---------------|------------------|--------------------------------------------------------------------------|---------|-----------|----------|------------|
| A_51_P205286  | PCSK4            | proprotein convertase subtilisin/kexin type 4                            | 1.9094  | 9.28E-05  | -2.22658 | 4.83E-06   |
| A_52_P51429   | DENND1C          | DENN/MADD domain containing 1C                                           | 1.90945 | 7.11E-09  | -2.88943 | 1.11E-13   |
| A_52_P294948  | TRAM2            | translocation associated membrane protein 2                              | 1.91547 | 0.0007882 | -1.56663 | 0.0147233  |
| A_51_P285669  | PIGZ             | phosphatidylinositol glycan anchor biosynthesis, class Z                 | 1.9194  | 0.0051294 | 2.52105  | 0.00018382 |
| A_52_P32500   | HERPUD2          | HERPUD family member 2                                                   | 1.91965 | 1.39E-05  | 1.61102  | 0.00064102 |
| A_52_P508506  | PCED1A           | PC-esterase domain containing 1A                                         | 1.91973 | 0.0001392 | 1.56102  | 0.00547152 |
| A_52_P421897  | MORC4            | MORC family CW-type zinc finger 4                                        | 1.91993 | 0.0001869 | 1.68658  | 0.00181315 |
| A_51_P287691  | KREMEN2          | kringle containing transmembrane protein 2                               | 1.92235 | 0.0003049 | 2.28558  | 1.56E-05   |
| A_52_P544540  | FAM208B          | family with sequence similarity 208, member B                            | 1.92258 | 0.0002754 | -1.5631  | 0.00829864 |
| A_51_P188911  | GALNT12          | polypeptide N-acetylgalactosaminyltransferase 12                         | 1.92443 | 2.05E-11  | -2.53164 | 4.65E-15   |
| A_52_P658513  | SLC50A1          | solute carrier family 50 (sugar efflux transporter), member 1            | 1.92466 | 2.94E-06  | 1.95058  | 2.13E-06   |
| A_51_P362857  | C14orf80         | chromosome 14 open reading frame 80                                      | 1.92658 | 1.72E-07  | 1.87075  | 3.87E-07   |
| A_52_P354373  | 1190002F15Rik    | RIKEN cDNA 1190002F15 gene                                               | 1.92946 | 8.04E-05  | -1.7961  | 0.00031414 |
| A_52_P188423  | LRRFP1           | leucine rich repeat (in FLII) interacting protein 1                      | 1.9336  | 0.0010705 | 5.10205  | 9.00E-10   |
| A_52_P1037027 | Apela            | apelin receptor early endogenous ligand                                  | 1.93402 | 1.04E-07  | -2.04689 | 2.21E-08   |
| A_51_P518470  | TTC14            | tetratricopeptide repeat domain 14                                       | 1.93491 | 7.13E-06  | 1.63531  | 0.00032418 |
| A_52_P340700  | CDC42SE1         | CDC42 small effector 1                                                   | 1.93554 | 5.52E-12  | 1.65715  | 2.00E-09   |
| A_52_P579654  | OSBPL10          | oxysterol binding protein-like 10                                        | 1.9357  | 0.0005219 | -1.93535 | 0.00052345 |
| A_52_P507498  | PLXNC1           | plexin C1                                                                | 1.93947 | 0.0059289 | -3.42427 | 6.46E-06   |
| A_52_P406141  | WWOX             | WW domain containing oxidoreductase                                      | 1.93988 | 0.0005738 | -2.2091  | 7.31E-05   |
| A_52_P611728  | C9orf64          | chromosome 9 open reading frame 64                                       | 1.94044 | 2.16E-10  | 2.18868  | 5.08E-12   |
| A_51_P437683  | Ube2dnl1/Ube2dnl | ubiquitin-conjugating enzyme E2D N-terminal like 1                       | 1.94175 | 0.0010447 | 2.25542  | 0.00011393 |
| A_51_P389636  | KCNN4            | potassium channel, calcium activated intermediate/small co               | 1.94239 | 0.0017586 | 3.73914  | 1.83E-07   |
| A_52_P647069  | ANKRD52          | ankyrin repeat domain 52                                                 | 1.94462 | 1.49E-05  | 2.36858  | 2.33E-07   |
| A_51_P206635  | SCLT1            | sodium channel and clathrin linker 1                                     | 1.94487 | 0.0019576 | -1.6794  | 0.0127013  |
| A_52_P290944  | MAMDC4           | MAM domain containing 4                                                  | 1.94502 | 0.0061205 | -2.92627 | 4.98E-05   |
| A_52_P885499  | MAP6             | microtubule-associated protein 6                                         | 1.9451  | 6.28E-09  | 1.617    | 2.24E-06   |
| A_52_P17115   | ZNRF1            | zinc and ring finger 1, E3 ubiquitin protein ligase                      | 1.94931 | 5.47E-13  | 1.56107  | 4.37E-09   |
| A_52_P477489  | EEF1D            | eukaryotic translation elongation factor 1 delta (guanine nu             | 1.94981 | 5.67E-07  | 1.81504  | 3.61E-06   |
| A_51_P482585  | 1700049E17Rik1   | RIKEN cDNA 1700049E17 gene, gene 1                                       | 1.95033 | 1.83E-05  | 12.6114  | 7.39E-18   |
| A_52_P608322  | MAFF             | v-maf avian musculoaponeurotic fibrosarcoma oncogene ho                  | 1.95218 | 1.28E-08  | -2.49857 | 1.60E-11   |
| A_51_P425642  | GRASP            | GRP1 (general receptor for phosphoinositides 1)-associated               | 1.95537 | 1.26E-10  | 1.55338  | 4.96E-07   |
| A_52_P181235  | USE1             | unconventional SNARE in the ER 1 homolog ( <i>S. cerevisiae</i> )        | 1.96002 | 1.48E-08  | -1.89886 | 3.76E-08   |
| A_51_P151484  | ATP1B1           | ATPase, Na <sup>+</sup> /K <sup>+</sup> transporting, beta 1 polypeptide | 1.96328 | 4.52E-05  | 1.68892  | 0.00082776 |
| A_52_P624572  | BMPRI1A          | bone morphogenetic protein receptor, type IA                             | 1.96407 | 1.13E-05  | 1.6982   | 0.0002582  |
| A_51_P374651  | BAZ1A            | bromodomain adjacent to zinc finger domain, 1A                           | 1.9646  | 1.08E-05  | 1.76802  | 0.00010573 |
| A_52_P320553  | 2900097C17Rik    | RIKEN cDNA 2900097C17 gene                                               | 1.96521 | 0.0034329 | 3.20818  | 6.78E-06   |
| A_52_P470560  | DPYS             | dihydropyrimidinase                                                      | 1.96572 | 0.0015343 | -2.80991 | 1.02E-05   |
| A_51_P273684  | GBE1             | glucan (1,4-alpha-), branching enzyme 1                                  | 1.96737 | 2.38E-07  | -1.53055 | 0.00021012 |
| A_52_P645862  | AGTR1            | angiotensin II receptor, type 1                                          | 1.96751 | 0.0002469 | -2.69342 | 1.24E-06   |
| A_51_P175146  | CPNE3            | copine III                                                               | 1.96823 | 1.90E-08  | -1.60764 | 8.41E-06   |
| A_52_P538995  | CORO2B           | coronin, actin binding protein, 2B                                       | 1.96903 | 1.54E-05  | -3.3254  | 5.22E-10   |
| A_52_P585424  | ISPD             | isoprenoid synthase domain containing                                    | 1.96935 | 0.0035826 | 2.97975  | 1.98E-05   |
| A_51_P416910  | SLC36A4          | solute carrier family 36 (proton/amino acid symporter), mer              | 1.97047 | 1.15E-07  | 1.53611  | 0.00012136 |
| A_51_P110088  | SLC9A7           | solute carrier family 9, subfamily A (NHE7, cation proton ant            | 1.97191 | 0.0043538 | 2.84168  | 5.17E-05   |
| A_51_P256665  | PON3             | paraoxonase 3                                                            | 1.97343 | 1.41E-07  | -2.18833 | 9.61E-09   |
| A_52_P661672  | UHRF1BP1         | UHRF1 binding protein 1                                                  | 1.97345 | 5.65E-09  | 1.7539   | 2.10E-07   |
| A_52_P381806  | TERF2IP          | telomeric repeat binding factor 2, interacting protein                   | 1.97383 | 1.49E-10  | 1.69267  | 2.89E-08   |
| A_52_P222775  | MAP3K6           | mitogen-activated protein kinase kinase kinase 6                         | 1.97564 | 4.61E-10  | 1.88878  | 1.94E-09   |
| A_51_P195958  | PHLDA1           | pleckstrin homology-like domain, family A, member 1                      | 1.97572 | 0.0006464 | 5.956    | 8.44E-11   |
| A_51_P251915  | IRGQ             | immunity-related GTPase family, Q                                        | 1.97651 | 6.02E-08  | 2.53092  | 1.08E-10   |
| A_51_P365980  | C1orf198         | chromosome 1 open reading frame 198                                      | 1.97688 | 3.47E-09  | -1.57231 | 5.27E-06   |
| A_51_P448545  | KLHL35           | kelch-like family member 35                                              | 1.97956 | 0.0014101 | 2.0798   | 0.00071827 |

|              |                                       |                                                             |         |           |          |            |
|--------------|---------------------------------------|-------------------------------------------------------------|---------|-----------|----------|------------|
| A_51_P271021 | TMEM168                               | transmembrane protein 168                                   | 1.97981 | 0.0033143 | 1.88306  | 0.00597318 |
| A_52_P145033 | Nisch                                 | nischarin                                                   | 1.98014 | 2.05E-09  | 2.89469  | 9.09E-14   |
| A_51_P196353 | SNCAIP                                | synuclein, alpha interacting protein                        | 1.9802  | 0.004799  | 18.6156  | 1.79E-13   |
| A_51_P505823 | ENDOD1                                | endonuclease domain containing 1                            | 1.98071 | 2.21E-05  | 5.22957  | 8.25E-13   |
| A_52_P328497 | CDK10                                 | cyclin-dependent kinase 10                                  | 1.98087 | 7.09E-09  | -2.19305 | 4.00E-10   |
| A_52_P28806  | FOXM1                                 | forkhead box M1                                             | 1.98123 | 4.38E-08  | 1.84033  | 3.49E-07   |
| A_52_P249920 | ZSCAN29                               | zinc finger and SCAN domain containing 29                   | 1.98446 | 4.59E-07  | 1.56523  | 0.00020774 |
| A_52_P422557 | ZNF362                                | zinc finger protein 362                                     | 1.98624 | 1.93E-08  | 7.03212  | 3.18E-19   |
| A_51_P507359 | WBSCR27                               | Williams Beuren syndrome chromosome region 27               | 1.98697 | 1.62E-09  | -1.50919 | 1.38E-05   |
| A_51_P151307 | FAM184A                               | family with sequence similarity 184, member A               | 1.98704 | 0.0062565 | 2.19882  | 0.00208312 |
| A_52_P504268 | B3GALNT1                              | beta-1,3-N-acetylgalactosaminyltransferase 1 (globoside blo | 1.99133 | 5.26E-09  | -2.93114 | 2.56E-13   |
| A_51_P206824 | HFE2                                  | hemochromatosis type 2 (juvenile)                           | 1.99143 | 0.0003374 | -1.93691 | 0.00052436 |
| A_51_P152102 | ATOH7                                 | atonal bHLH transcription factor 7                          | 1.99237 | 0.0032459 | -2.53008 | 0.00017034 |
| A_51_P318637 | B3GALNT1                              | beta-1,3-N-acetylgalactosaminyltransferase 1 (globoside blo | 1.99465 | 6.38E-05  | -2.0926  | 2.62E-05   |
| A_51_P381821 | FST                                   | follistatin                                                 | 1.99612 | 0.0030403 | 2.46192  | 0.00022662 |
| A_52_P32561  | A030010E16Rik                         | RIKEN cDNA A030010E16 gene                                  | 2.00136 | 4.86E-06  | -3.02807 | 9.26E-10   |
| A_51_P357759 | PLD2                                  | phospholipase D2                                            | 2.00332 | 2.33E-08  | -2.14854 | 3.48E-09   |
| A_52_P5263   |                                       |                                                             | 2.00421 | 1.90E-09  | -1.66911 | 6.12E-07   |
| A_52_P8324   | TMEM178A                              | transmembrane protein 178A                                  | 2.00581 | 0.0001607 | 4.61409  | 2.52E-10   |
| A_52_P69857  | 2610028E06Rik                         | RIKEN cDNA 2610028E06 gene                                  | 2.00604 | 0.0030253 | -1.82926 | 0.00879966 |
| A_52_P428654 | ZIC1                                  | Zic family member 1                                         | 2.00622 | 0.0019516 | 3.97374  | 2.35E-07   |
| A_51_P101075 | CNPPD1                                | cyclin Pas1/PHO80 domain containing 1                       | 2.0069  | 1.01E-08  | 2.06289  | 4.65E-09   |
| A_51_P488175 | PHF20L1                               | PHD finger protein 20-like 1                                | 2.00913 | 0.000143  | 1.65774  | 0.00351976 |
| A_52_P925197 | BTG2                                  | BTG family, member 2                                        | 2.0094  | 0.0008598 | 13.6236  | 3.85E-14   |
| A_51_P234488 | TMOD2                                 | tropomodulin 2 (neuronal)                                   | 2.01078 | 8.41E-10  | 1.58537  | 2.00E-06   |
| A_51_P166740 | KCNJ4                                 | potassium channel, inwardly rectifying subfamily J, member  | 2.01118 | 8.94E-10  | 7.13373  | 7.37E-21   |
| A_51_P160581 | BRSK2                                 | BR serine/threonine kinase 2                                | 2.01396 | 3.77E-05  | -1.97521 | 5.47E-05   |
| A_51_P288505 | TRADD                                 | TNFRSF1A-associated via death domain                        | 2.01461 | 1.36E-11  | -1.7966  | 6.98E-10   |
| A_51_P140042 | ADAD2                                 | adenosine deaminase domain containing 2                     | 2.01584 | 2.16E-07  | 1.94062  | 5.72E-07   |
| A_51_P482552 | VEGFA                                 | vascular endothelial growth factor A                        | 2.01641 | 1.48E-12  | 1.74451  | 2.79E-10   |
| A_51_P394889 | 4930573O21Rik                         | RIKEN cDNA 4930573O21 gene                                  | 2.01777 | 6.90E-05  | -1.71385 | 0.00127488 |
| A_51_P453043 | AACS                                  | acetoacetyl-CoA synthetase                                  | 2.0182  | 4.90E-13  | 1.64338  | 1.19E-09   |
| A_52_P675617 | AGBL3                                 | ATP/GTP binding protein-like 3                              | 2.01855 | 0.0017281 | 2.25449  | 0.00040919 |
| A_51_P442206 | ANKRD42                               | ankyrin repeat domain 42                                    | 2.01904 | 0.0009492 | 2.29191  | 0.00015896 |
| A_52_P477533 | ZSWIM8                                | zinc finger, SWIM-type containing 8                         | 2.0229  | 2.42E-09  | 3.50598  | 3.92E-15   |
| A_52_P123400 | DNAAF2                                | dynein, axonemal, assembly factor 2                         | 2.02389 | 1.32E-13  | 1.83308  | 4.83E-12   |
| A_52_P190873 | EXOG                                  | endo/exonuclease (5'-3'), endonuclease G-like               | 2.02418 | 1.58E-07  | 2.09903  | 6.28E-08   |
| A_52_P113672 | CHML                                  | choroideremia-like (Rab escort protein 2)                   | 2.02709 | 2.19E-06  | -1.67802 | 0.00016497 |
| A_51_P208769 | METRN                                 | meteorin, glial cell differentiation regulator              | 2.02773 | 3.29E-06  | -1.64575 | 0.00034296 |
| A_52_P368262 | BCL7C                                 | B-cell CLL/lymphoma 7C                                      | 2.03058 | 6.74E-08  | -1.50245 | 0.00026623 |
| A_51_P401471 | EEF1G                                 | eukaryotic translation elongation factor 1 gamma            | 2.03148 | 1.05E-11  | -2.43052 | 4.94E-14   |
| A_52_P382325 | AHNAK                                 | AHNAK nucleoprotein                                         | 2.03156 | 6.77E-08  | 6.51534  | 1.21E-17   |
| A_52_P567359 | SMAD5                                 | SMAD family member 5                                        | 2.03219 | 3.80E-09  | 1.86507  | 4.75E-08   |
| A_52_P571938 | ARV1                                  | ARV1 homolog, fatty acid homeostasis modulator              | 2.03348 | 3.64E-12  | -1.81472 | 1.88E-10   |
| A_51_P248959 | STXBP5                                | syntaxin binding protein 5 (tomosyn)                        | 2.03828 | 1.89E-07  | -1.51827 | 0.00039833 |
| A_51_P297984 | ZSWIM8                                | zinc finger, SWIM-type containing 8                         | 2.03979 | 2.78E-10  | 3.7554   | 9.99E-17   |
| A_51_P221176 | TTC21B                                | tetratricopeptide repeat domain 21B                         | 2.04094 | 2.79E-06  | 1.66737  | 0.00025376 |
| A_51_P252859 | CYR61                                 | cysteine-rich, angiogenic inducer, 61                       | 2.04182 | 8.90E-12  | 9.87221  | 7.07E-25   |
| A_51_P145596 | Gm3383 (includes cpredicted gene 3383 |                                                             | 2.0434  | 1.48E-05  | 4.70264  | 5.69E-12   |
| A_52_P374511 | Gm3383 (includes cpredicted gene 3383 |                                                             | 2.04425 | 0.0004553 | 9.75463  | 4.28E-13   |
| A_52_P254237 | TMEM229A                              | transmembrane protein 229A                                  | 2.04644 | 0.0027292 | 9.26099  | 5.98E-11   |
| A_51_P138895 | CCDC102A                              | coiled-coil domain containing 102A                          | 2.04911 | 8.47E-06  | -1.90426 | 3.86E-05   |
| A_52_P406864 | FAM179B                               | family with sequence similarity 179, member B               | 2.04949 | 2.90E-09  | 1.53351  | 2.24E-05   |

|              |               |                                                             |         |           |          |            |
|--------------|---------------|-------------------------------------------------------------|---------|-----------|----------|------------|
| A_51_P421300 | CALY          | calcyon neuron-specific vesicular protein                   | 2.05243 | 4.30E-06  | 5.43843  | 1.08E-13   |
| A_52_P597134 | INPP5E        | inositol polyphosphate-5-phosphatase E                      | 2.05395 | 4.36E-06  | 2.01464  | 6.59E-06   |
| A_52_P550884 | SAMD12        | sterile alpha motif domain containing 12                    | 2.05509 | 4.78E-05  | 7.15059  | 1.80E-13   |
| A_52_P535946 | DHCR7         | 7-dehydrocholesterol reductase                              | 2.05649 | 1.31E-06  | -2.54618 | 1.20E-08   |
| A_52_P343839 | RND3          | Rho family GTPase 3                                         | 2.05953 | 7.03E-08  | 1.50518  | 0.00032396 |
| A_52_P284927 | CACFD1        | calcium channel flower domain containing 1                  | 2.06091 | 4.07E-06  | 2.90936  | 3.67E-09   |
| A_52_P549881 | 1700030C10Rik | RIKEN cDNA 1700030C10 gene                                  | 2.0627  | 1.39E-07  | -2.29953 | 9.78E-09   |
| A_52_P375931 | CMTR2         | cap methyltransferase 2                                     | 2.0642  | 1.26E-07  | 4.53772  | 1.21E-14   |
| A_52_P465828 | IQCE          | IQ motif containing E                                       | 2.06456 | 2.14E-06  | -2.78842 | 3.85E-09   |
| A_52_P521324 | A930024E05Rik | RIKEN cDNA A930024E05 gene                                  | 2.06556 | 0.0033152 | -2.32315 | 0.0008608  |
| A_51_P257885 | MMD2          | monocyte to macrophage differentiation-associated 2         | 2.06585 | 3.45E-08  | 2.31508  | 1.91E-09   |
| A_52_P173108 | TET3          | tet methylcytosine dioxygenase 3                            | 2.06815 | 0.0001124 | 1.57081  | 0.00940259 |
| A_51_P429087 | RP2           | retinitis pigmentosa 2 (X-linked recessive)                 | 2.06843 | 1.61E-06  | -1.87107 | 1.55E-05   |
| A_51_P175018 | APCDD1        | adenomatosis polyposis coli down-regulated 1                | 2.06877 | 4.21E-09  | 1.93206  | 2.94E-08   |
| A_51_P117581 | CABLES1       | Cdk5 and Abl enzyme substrate 1                             | 2.06943 | 1.79E-11  | -5.98975 | 2.19E-21   |
| A_51_P297778 | SH3TC1        | SH3 domain and tetratricopeptide repeats 1                  | 2.06981 | 8.40E-06  | -1.59165 | 0.00168704 |
| A_51_P188704 | UNC13A        | unc-13 homolog A (C. elegans)                               | 2.07069 | 3.72E-08  | 1.76033  | 2.99E-06   |
| A_51_P404785 | CDK10         | cyclin-dependent kinase 10                                  | 2.07426 | 5.19E-12  | -2.04486 | 8.19E-12   |
| A_52_P636752 | CYP51A1       | cytochrome P450, family 51, subfamily A, polypeptide 1      | 2.07598 | 4.18E-09  | -1.52774 | 4.11E-05   |
| A_52_P428851 | CDK12         | cyclin-dependent kinase 12                                  | 2.07821 | 3.23E-08  | 1.72838  | 4.80E-06   |
| A_52_P635312 | IRX2          | iroquois homeobox 2                                         | 2.08096 | 5.82E-06  | 1.82091  | 9.30E-05   |
| A_52_P551903 | SLC33A1       | solute carrier family 33 (acetyl-CoA transporter), member 1 | 2.08127 | 5.10E-05  | 3.94758  | 1.05E-09   |
| A_52_P899620 | Zfp882        | zinc finger protein 882                                     | 2.0814  | 8.40E-07  | 1.66323  | 0.00015646 |
| A_51_P465082 | TOX3          | TOX high mobility group box family member 3                 | 2.0834  | 0.0029966 | -2.39722 | 0.0005921  |
| A_51_P396978 | KCNIP4        | Kv channel interacting protein 4                            | 2.08412 | 0.0081885 | 2.26255  | 0.00372408 |
| A_51_P228658 | ISYNA1        | inositol-3-phosphate synthase 1                             | 2.08729 | 2.93E-10  | -2.06871 | 3.81E-10   |
| A_52_P220370 | ANKLE1        | ankyrin repeat and LEM domain containing 1                  | 2.08976 | 7.60E-06  | 1.66536  | 0.00073916 |
| A_51_P219444 | PLCL2         | phospholipase C-like 2                                      | 2.09325 | 2.39E-09  | 3.93895  | 1.36E-15   |
| A_51_P127320 | CABS1         | calcium-binding protein, spermatid-specific 1               | 2.09438 | 4.07E-06  | -1.77864 | 0.00012683 |
| A_52_P347248 | ZNF362        | zinc finger protein 362                                     | 2.09549 | 0.0005056 | 2.4267   | 6.12E-05   |
| A_51_P115666 | FAM83H        | family with sequence similarity 83, member H                | 2.09717 | 1.06E-06  | 13.0736  | 5.81E-19   |
| A_52_P633612 | PARD3         | par-3 family cell polarity regulator                        | 2.09783 | 1.95E-08  | 1.62987  | 2.08E-05   |
| A_51_P116906 | RAPGEF3       | Rap guanine nucleotide exchange factor (GEF) 3              | 2.09793 | 1.23E-07  | -2.28649 | 1.55E-08   |
| A_51_P370380 | RDH14         | retinol dehydrogenase 14 (all-trans/9-cis/11-cis)           | 2.10129 | 2.74E-11  | 2.12104  | 2.06E-11   |
| A_52_P122822 | WDFY2         | WD repeat and FYVE domain containing 2                      | 2.1015  | 1.51E-09  | -2.06525 | 2.46E-09   |
| A_51_P377390 | NDST2         | N-deacetylase/N-sulfotransferase (heparan glucosaminyl) 2   | 2.10183 | 1.12E-12  | 1.63393  | 9.61E-09   |
| A_52_P310040 | FAM208B       | family with sequence similarity 208, member B               | 2.10926 | 1.23E-06  | -1.59051 | 0.00067525 |
| A_51_P147064 | 1600014C23Rik | RIKEN cDNA 1600014C23 gene                                  | 2.11025 | 0.0001194 | -2.68384 | 2.38E-06   |
| A_52_P145993 | Ccdc74a       | coiled-coil domain containing 74A                           | 2.11149 | 3.81E-08  | -2.23902 | 8.80E-09   |
| A_51_P248962 | STXBPS        | syntaxin binding protein 5 (tomosyn)                        | 2.11407 | 1.45E-08  | -1.73073 | 3.49E-06   |
| A_51_P456098 | TMEM175       | transmembrane protein 175                                   | 2.11575 | 2.93E-11  | -1.78545 | 7.01E-09   |
| A_51_P212427 | LAMA4         | laminin, alpha 4                                            | 2.11593 | 0.0004734 | 1.87094  | 0.00259982 |
| A_51_P217878 |               |                                                             | 2.11849 | 0.0026909 | -2.31102 | 0.00099945 |
| A_52_P89267  | GATSL2        | GATS protein-like 2                                         | 2.11851 | 6.32E-09  | -1.64363 | 8.62E-06   |
| A_52_P641849 | KHNYN         | KH and NYN domain containing                                | 2.11952 | 3.47E-13  | 1.54517  | 4.77E-08   |
| A_51_P148783 | DNAAF2        | dynein, axonemal, assembly factor 2                         | 2.11991 | 4.21E-10  | 1.59398  | 3.15E-06   |
| A_51_P226016 | SLC30A4       | solute carrier family 30 (zinc transporter), member 4       | 2.12135 | 2.16E-06  | 4.43651  | 2.38E-12   |
| A_51_P335770 | AFAP1         | actin filament associated protein 1                         | 2.12192 | 2.32E-10  | 1.98504  | 1.66E-09   |
| A_52_P817975 | KLF12         | Kruppel-like factor 12                                      | 2.1243  | 2.09E-06  | -3.22348 | 5.29E-10   |
| A_51_P457813 | ERMARD        | ER membrane-associated RNA degradation                      | 2.12622 | 7.55E-10  | 1.77903  | 1.51E-07   |
| A_52_P288177 | EPHA4         | EPH receptor A4                                             | 2.12869 | 1.08E-08  | 1.85275  | 4.62E-07   |
| A_52_P171663 | DNAJB1        | DnaJ (Hsp40) homolog, subfamily B, member 1                 | 2.13204 | 2.18E-13  | 1.99382  | 1.99E-12   |
| A_52_P225377 | Pvr           | poliovirus receptor                                         | 2.13247 | 3.78E-07  | 2.75977  | 1.37E-09   |



|               |                                             |                                                              |         |           |          |            |
|---------------|---------------------------------------------|--------------------------------------------------------------|---------|-----------|----------|------------|
| A_52_P570240  | KBTBD11                                     | kelch repeat and BTB (POZ) domain containing 11              | 2.13331 | 2.97E-09  | 11.7015  | 7.29E-22   |
| A_51_P137778  | 5730507C01Rik/GrrRIKEN cDNA 5730507C01 gene |                                                              | 2.13406 | 6.94E-07  | -2.54674 | 1.51E-08   |
| A_51_P334344  | PHF20L1                                     | PHD finger protein 20-like 1                                 | 2.13546 | 4.33E-06  | 2.27113  | 1.25E-06   |
| A_52_P586391  |                                             |                                                              | 2.14039 | 5.59E-05  | 2.58755  | 2.23E-06   |
| A_51_P450952  | P3H4                                        | prolyl 3-hydroxylase family member 4 (non-enzymatic)         | 2.14082 | 1.62E-09  | -1.62466 | 5.56E-06   |
| A_52_P33927   | UTP6                                        | UTP6, small subunit (SSU) processome component, homolog      | 2.14306 | 7.04E-05  | -2.56643 | 3.49E-06   |
| A_51_P280918  | ITFG1                                       | integrin alpha FG-GAP repeat containing 1                    | 2.14343 | 5.01E-10  | 1.69709  | 5.80E-07   |
| A_52_P470438  | DPYSL4                                      | dihydropyrimidinase-like 4                                   | 2.14409 | 1.35E-06  | -2.05854 | 3.26E-06   |
| A_51_P270997  | IGFBPL1                                     | insulin-like growth factor binding protein-like 1            | 2.14684 | 1.12E-07  | -7.34903 | 3.47E-17   |
| A_51_P301603  | AI854517                                    | expressed sequence AI854517                                  | 2.14687 | 3.50E-07  | 2.50962  | 1.10E-08   |
| A_51_P292447  | KLHL36                                      | kelch-like family member 36                                  | 2.14787 | 1.88E-09  | -2.50298 | 3.65E-11   |
| A_52_P546175  |                                             |                                                              | 2.15075 | 1.08E-09  | -1.93739 | 2.08E-08   |
| A_51_P395473  | TNS2                                        | tensin 2                                                     | 2.15232 | 2.30E-11  | -4.4198  | 1.71E-18   |
| A_51_P176068  | PRAMEF7/PRAMEF:PRAME family member 8        |                                                              | 2.15239 | 3.43E-08  | 4.86646  | 2.76E-15   |
| A_52_P236705  | RIPPLY3                                     | rippy transcriptional repressor 3                            | 2.15254 | 6.39E-07  | -4.26685 | 1.23E-12   |
| A_52_P605319  | BC051665                                    | cDNA sequence BC051665                                       | 2.15328 | 1.27E-08  | 4.78371  | 1.00E-15   |
| A_52_P208703  | Ubp2l                                       | ubiquitin-associated protein 2-like                          | 2.15351 | 2.20E-06  | 3.06712  | 2.05E-09   |
| A_51_P309988  | GPRC5C                                      | G protein-coupled receptor, class C, group 5, member C       | 2.15588 | 4.83E-08  | 2.52002  | 1.22E-09   |
| A_52_P582969  | NFKB1                                       | nuclear factor of kappa light polypeptide gene enhancer in B | 2.15749 | 3.29E-07  | 5.2211   | 2.21E-14   |
| A_52_P315421  |                                             |                                                              | 2.15845 | 9.44E-12  | -2.00063 | 9.81E-11   |
| A_52_P273787  | WDR37                                       | WD repeat domain 37                                          | 2.15881 | 3.65E-08  | 1.64017  | 4.54E-05   |
| A_52_P1053160 | FAM129C                                     | family with sequence similarity 129, member C                | 2.16126 | 9.30E-05  | -1.54678 | 0.0154518  |
| A_51_P112762  | SLC5A3                                      | solute carrier family 5 (sodium/myo-inositol cotransporter), | 2.16318 | 0.0081019 | 3.45959  | 8.61E-05   |
| A_51_P201945  | CFAP97                                      | cilia and flagella associated protein 97                     | 2.16333 | 2.56E-10  | 2.15954  | 2.69E-10   |
| A_51_P516012  | NTRK2                                       | neurotrophic tyrosine kinase, receptor, type 2               | 2.16333 | 7.73E-08  | 3.63522  | 1.36E-12   |
| A_52_P683225  | TAOK3                                       | TAO kinase 3                                                 | 2.16483 | 3.18E-06  | -2.17564 | 2.87E-06   |
| A_52_P31093   | Gm3383 (includes cpredicted gene 3383       |                                                              | 2.16775 | 2.90E-06  | 11.9571  | 2.37E-17   |
| A_51_P422030  | OCEL1                                       | occludin/ELL domain containing 1                             | 2.17181 | 1.17E-10  | -4.45186 | 1.38E-17   |
| A_52_P134317  | PURG                                        | purine-rich element binding protein G                        | 2.17333 | 0.0026144 | -1.86225 | 0.0131988  |
| A_52_P241987  | GSKIP                                       | GSK3B interacting protein                                    | 2.17727 | 1.58E-12  | 1.6361   | 2.99E-08   |
| A_52_P625508  | CPT1B                                       | carnitine palmitoyltransferase 1B (muscle)                   | 2.18122 | 3.34E-10  | -1.72758 | 3.50E-07   |
| A_51_P439248  | MRC1                                        | mannose receptor, C type 1                                   | 2.18202 | 0.0049251 | 10.0262  | 8.92E-10   |
| A_51_P169886  | NSMF                                        | NMDA receptor synaptonuclear signaling and neuronal migr     | 2.18309 | 8.62E-07  | -1.9007  | 1.76E-05   |
| A_51_P485791  | CYP51A1                                     | cytochrome P450, family 51, subfamily A, polypeptide 1       | 2.18311 | 6.50E-07  | -1.6433  | 0.00035433 |
| A_51_P433870  | VEGFC                                       | vascular endothelial growth factor C                         | 2.18328 | 3.13E-10  | 2.08657  | 1.11E-09   |
| A_52_P647408  | GSPT2                                       | G1 to S phase transition 2                                   | 2.19194 | 7.02E-09  | -1.92353 | 2.19E-07   |
| A_51_P414243  | POMGNT2                                     | protein O-linked mannanose N-acetylglucosaminyltransferase   | 2.19269 | 7.92E-10  | 2.76913  | 2.36E-12   |
| A_52_P569375  | FGF5                                        | fibroblast growth factor 5                                   | 2.20078 | 4.76E-05  | -6.26146 | 7.97E-12   |
| A_52_P172145  | PDF                                         | peptide deformylase (mitochondrial)                          | 2.20111 | 2.15E-11  | 2.08705  | 1.02E-10   |
| A_52_P635338  | FES                                         | FES proto-oncogene, tyrosine kinase                          | 2.20179 | 3.06E-08  | -1.64764 | 4.97E-05   |
| A_52_P264136  | POMT2                                       | protein-O-mannosyltransferase 2                              | 2.20777 | 0.000246  | 3.5077   | 3.21E-07   |
| A_52_P590665  | TMEM161A                                    | transmembrane protein 161A                                   | 2.20804 | 2.16E-08  | 1.80338  | 3.74E-06   |
| A_51_P418737  | Rbm33                                       | RNA binding motif protein 33                                 | 2.20821 | 3.59E-06  | 6.08403  | 1.81E-13   |
| A_51_P153765  | CA13                                        | carbonic anhydrase XIII                                      | 2.20852 | 4.17E-08  | 1.84574  | 3.52E-06   |
| A_52_P465669  |                                             |                                                              | 2.21195 | 1.94E-09  | -1.96826 | 4.52E-08   |
| A_51_P101588  | ADAMTSL5                                    | ADAMTS-like 5                                                | 2.21866 | 2.61E-05  | 1.90033  | 0.00037096 |
| A_51_P207601  | AQP5                                        | aquaporin 5                                                  | 2.22234 | 1.22E-09  | -1.60146 | 1.44E-05   |
| A_51_P435023  | RASSF1                                      | Ras association (RalGDS/AF-6) domain family member 1         | 2.22237 | 9.48E-14  | 2.14127  | 3.01E-13   |
| A_52_P622850  | HES5                                        | hes family bHLH transcription factor 5                       | 2.22981 | 0.0005383 | -2.20677 | 0.0006161  |
| A_52_P565015  |                                             |                                                              | 2.23336 | 2.83E-09  | -1.77604 | 1.40E-06   |
| A_52_P239536  | PPP1R9A                                     | protein phosphatase 1, regulatory subunit 9A                 | 2.23347 | 6.61E-10  | -8.32079 | 2.82E-20   |
| A_51_P112405  | PLAUR                                       | plasminogen activator, urokinase receptor                    | 2.23363 | 2.14E-12  | 1.72265  | 1.04E-08   |
| A_52_P440723  | ZKSCAN1                                     | zinc finger with KRAB and SCAN domains 1                     | 2.23666 | 0.0006893 | 2.23403  | 0.00069956 |

|               |                                                          |                                                               |         |           |          |            |
|---------------|----------------------------------------------------------|---------------------------------------------------------------|---------|-----------|----------|------------|
| A_51_P498212  | UBE2J1                                                   | ubiquitin-conjugating enzyme E2, J1                           | 2.23727 | 0.0006444 | 2.08087  | 0.00159981 |
| A_52_P334259  |                                                          |                                                               | 2.23845 | 1.05E-09  | -2.02013 | 1.66E-08   |
| A_51_P483159  | GCHFR                                                    | GTP cyclohydrolase I feedback regulator                       | 2.2399  | 1.44E-05  | -2.08098 | 5.33E-05   |
| A_51_P156800  | MOB2                                                     | MOB kinase activator 2                                        | 2.24124 | 1.46E-09  | 2.1179   | 6.45E-09   |
| A_52_P134075  | OSBPL5                                                   | oxysterol binding protein-like 5                              | 2.24275 | 5.47E-05  | 3.03691  | 4.40E-07   |
| A_51_P365202  | ZNF560                                                   | zinc finger protein 560                                       | 2.2436  | 0.0010382 | 2.32646  | 0.00067245 |
| A_52_P220810  | TRIB2                                                    | tribbles pseudokinase 2                                       | 2.24392 | 1.25E-09  | 1.58326  | 2.44E-05   |
| A_51_P272023  | RNF186                                                   | ring finger protein 186                                       | 2.24433 | 0.0042154 | 3.51505  | 4.25E-05   |
| A_52_P1021832 |                                                          |                                                               | 2.24446 | 1.56E-08  | -1.55927 | 0.00018483 |
| A_52_P153302  | TTC39B                                                   | tetratricopeptide repeat domain 39B                           | 2.24591 | 1.20E-13  | -1.7195  | 1.10E-09   |
| A_52_P544302  | Gm7008                                                   | predicted gene 7008                                           | 2.24669 | 3.17E-05  | 2.03345  | 0.00016728 |
| A_52_P651034  | TMX1                                                     | thioredoxin-related transmembrane protein 1                   | 2.24888 | 8.09E-09  | 1.50494  | 0.00033441 |
| A_51_P160160  | 5730437C12Rik                                            | RIKEN cDNA 5730437C12 gene                                    | 2.25137 | 0.0001134 | 2.04913  | 0.00046244 |
| A_52_P662226  | PON3                                                     | paraoxonase 3                                                 | 2.25163 | 1.32E-07  | -3.56973 | 1.21E-11   |
| A_51_P409825  | FNDC4                                                    | fibronectin type III domain containing 4                      | 2.25446 | 9.43E-07  | -2.04066 | 7.45E-06   |
| A_52_P201206  | SCRN1                                                    | secernin 1                                                    | 2.25499 | 3.01E-10  | 3.4924   | 1.29E-14   |
| A_51_P364321  | KIF13B                                                   | kinesin family member 13B                                     | 2.25692 | 1.95E-09  | -2.27169 | 1.65E-09   |
| A_51_P461108  | OSBPL10                                                  | oxysterol binding protein-like 10                             | 2.25741 | 1.23E-13  | -2.03609 | 3.11E-12   |
| A_52_P994399  | Defa4                                                    | defensin, alpha, 4                                            | 2.26015 | 2.71E-05  | 3.79831  | 6.37E-09   |
| A_52_P52653   |                                                          |                                                               | 2.26063 | 0.0034214 | -2.07068 | 0.00803468 |
| A_51_P147822  | PON2                                                     | paraoxonase 2                                                 | 2.26172 | 0.0001564 | 1.76101  | 0.00525019 |
| A_52_P627816  | TGM1                                                     | transglutaminase 1                                            | 2.26205 | 1.92E-09  | 4.93175  | 2.76E-16   |
| A_51_P417651  | ARRDC2                                                   | arrestin domain containing 2                                  | 2.26595 | 5.11E-09  | -3.78329 | 9.13E-14   |
| A_52_P486464  | ZNF827                                                   | zinc finger protein 827                                       | 2.26702 | 5.32E-08  | -2.70705 | 1.07E-09   |
| A_51_P455416  | MAPK12                                                   | mitogen-activated protein kinase 12                           | 2.26908 | 7.39E-07  | -1.79607 | 1.00E-04   |
| A_51_P477121  | Pmaip1                                                   | phorbol-12-myristate-13-acetate-induced protein 1             | 2.26927 | 3.23E-06  | 5.39316  | 1.80E-12   |
| A_52_P747842  | 9130204L05Rik                                            | (inc RIKEN cDNA 9130204L05 gene                               | 2.27034 | 0.000111  | 3.67488  | 9.27E-08   |
| A_51_P311159  | PLA2G2E                                                  | phospholipase A2, group IIE                                   | 2.27047 | 1.97E-05  | 2.00252  | 0.00016803 |
| A_51_P411874  | ANKHD1/ANKHD1-lankyrin repeat and KH domain containing 1 |                                                               | 2.27477 | 0.0017024 | -2.09922 | 0.00404931 |
| A_51_P458794  | ZNF438                                                   | zinc finger protein 438                                       | 2.27878 | 4.60E-11  | 1.50554  | 1.92E-05   |
| A_51_P237383  | RNASE4                                                   | ribonuclease, RNase A family, 4                               | 2.27937 | 1.20E-05  | 4.82944  | 7.03E-11   |
| A_51_P472372  | TTC17                                                    | tetratricopeptide repeat domain 17                            | 2.28308 | 6.86E-13  | 1.86546  | 4.01E-10   |
| A_52_P590701  | DZIP3                                                    | DAZ interacting zinc finger protein 3                         | 2.28387 | 5.83E-09  | 2.2055   | 1.37E-08   |
| A_51_P311227  | DROSHA                                                   | drosha, ribonuclease type III                                 | 2.28443 | 1.14E-07  | 3.6943   | 8.18E-12   |
| A_51_P160544  | EFEMP2                                                   | EGF containing fibulin-like extracellular matrix protein 2    | 2.28892 | 3.01E-12  | 1.8764   | 1.33E-09   |
| A_52_P249336  | Defa3                                                    | (includes oth defensin, alpha, 3                              | 2.29249 | 1.62E-05  | 3.60905  | 9.41E-09   |
| A_52_P591166  | DPYSL2                                                   | dihydropyrimidinase-like 2                                    | 2.29582 | 3.62E-07  | -3.13816 | 7.51E-10   |
| A_52_P843431  |                                                          |                                                               | 2.29741 | 5.41E-10  | 3.82495  | 7.78E-15   |
| A_51_P463034  | C19orf57                                                 | chromosome 19 open reading frame 57                           | 2.30272 | 9.06E-13  | 1.58292  | 2.51E-07   |
| A_52_P326664  | UNC93A                                                   | unc-93 homolog A (C. elegans)                                 | 2.30275 | 0.0024438 | 2.2421   | 0.00320686 |
| A_52_P550147  | SNED1                                                    | sushi, nidogen and EGF-like domains 1                         | 2.30323 | 3.11E-11  | -5.62638 | 4.27E-19   |
| A_52_P180101  | FYCO1                                                    | FYVE and coiled-coil domain containing 1                      | 2.30378 | 1.23E-06  | -1.69944 | 0.00053872 |
| A_52_P228389  | HMG20A                                                   | high mobility group 20A                                       | 2.30804 | 3.81E-10  | 2.07552  | 6.39E-09   |
| A_52_P455379  | Pramel6                                                  | preferentially expressed antigen in melanoma like 6           | 2.31193 | 0.0020864 | 11.2179  | 1.56E-10   |
| A_51_P443618  | C16orf13                                                 | chromosome 16 open reading frame 13                           | 2.31637 | 3.66E-15  | 1.60392  | 2.22E-09   |
| A_51_P260300  | IKBKG                                                    | inhibitor of kappa light polypeptide gene enhancer in B-cells | 2.3179  | 3.40E-08  | 1.68867  | 6.49E-05   |
| A_52_P65108   | SMAD1                                                    | SMAD family member 1                                          | 2.32004 | 1.15E-08  | 1.52754  | 0.00041387 |
| A_51_P473229  | ZBTB7B                                                   | zinc finger and BTB domain containing 7B                      | 2.32233 | 3.87E-07  | 3.88554  | 2.60E-11   |
| A_52_P279687  | LRP8                                                     | low density lipoprotein receptor-related protein 8, apolipop  | 2.32568 | 3.66E-05  | -1.95618 | 0.00055724 |
| A_51_P314397  | Crip2                                                    | cysteine rich protein 2                                       | 2.32624 | 5.03E-11  | 3.04991  | 7.36E-14   |
| A_52_P401504  | THBS4                                                    | thrombospondin 4                                              | 2.32649 | 0.0017771 | 2.01681  | 0.00773666 |
| A_52_P19519   | PLCE1                                                    | phospholipase C, epsilon 1                                    | 2.32869 | 1.39E-06  | -1.73826 | 0.00043046 |
| A_51_P312693  | KIAA0754                                                 | KIAA0754                                                      | 2.33004 | 0.0088338 | 2.92031  | 0.00132654 |

|              |               |                                                                |         |           |          |            |
|--------------|---------------|----------------------------------------------------------------|---------|-----------|----------|------------|
| A_52_P646663 | CCDC53        | coiled-coil domain containing 53                               | 2.33014 | 2.78E-08  | 1.52375  | 0.00074484 |
| A_52_P217710 | FZD6          | frizzled class receptor 6                                      | 2.33428 | 3.50E-05  | 1.60346  | 0.0106292  |
| A_51_P146560 | MSLN          | mesothelin                                                     | 2.3352  | 4.83E-09  | 2.74764  | 1.19E-10   |
| A_52_P399814 | CCSAP         | centriole, cilia and spindle-associated protein                | 2.34229 | 2.96E-09  | 1.5491   | 0.00015137 |
| A_52_P252258 | MAPK12        | mitogen-activated protein kinase 12                            | 2.34499 | 7.55E-08  | -2.19828 | 3.12E-07   |
| A_51_P217498 | SLC2A4        | solute carrier family 2 (facilitated glucose transporter), mem | 2.34634 | 3.71E-09  | 2.98282  | 1.76E-11   |
| A_51_P111488 | GFOD2         | glucose-fructose oxidoreductase domain containing 2            | 2.34827 | 1.06E-10  | -1.94803 | 1.80E-08   |
| A_52_P299964 | Maml2         | mastermind like 2 (Drosophila)                                 | 2.34827 | 0.0020483 | 2.07867  | 0.00695224 |
| A_51_P171832 | Nrgn          | neurogranin                                                    | 2.34846 | 2.36E-08  | -2.02325 | 7.58E-07   |
| A_52_P884550 | Gm36839       | predicted gene, 36839                                          | 2.35054 | 0.0082057 | 3.55649  | 0.00022983 |
| A_52_P255724 | 1810009N02Rik | RIKEN cDNA 1810009N02 gene                                     | 2.35348 | 1.01E-10  | 1.56968  | 1.38E-05   |
| A_52_P43549  | CD38          | CD38 molecule                                                  | 2.35696 | 6.69E-10  | 1.52916  | 0.00010028 |
| A_52_P119792 | ZNF443        | zinc finger protein 443                                        | 2.35735 | 9.57E-07  | 1.57426  | 0.00262008 |
| A_51_P274593 | PSMF1         | proteasome inhibitor subunit 1                                 | 2.35777 | 1.47E-06  | 3.56471  | 9.04E-10   |
| A_52_P641341 | FUT11         | fucosyltransferase 11 (alpha (1,3) fucosyltransferase)         | 2.35956 | 5.70E-08  | -1.50968 | 0.0015264  |
| A_51_P122075 | DOCK1         | dedicator of cytokinesis 1                                     | 2.36304 | 7.89E-11  | 7.50693  | 4.77E-20   |
| A_52_P240542 | ID2           | inhibitor of DNA binding 2, dominant negative helix-loop-he    | 2.36663 | 5.60E-07  | 4.04527  | 3.59E-11   |
| A_51_P187151 | GRB10         | growth factor receptor-bound protein 10                        | 2.37034 | 2.28E-06  | 1.65199  | 0.00183122 |
| A_52_P577208 | SCFD2         | sec1 family domain containing 2                                | 2.37306 | 6.72E-09  | 3.48516  | 2.17E-12   |
| A_52_P555664 | B3GNT5        | UDP-GlcNAc:betaGal beta-1,3-N-acetylglucosaminyltransfer:      | 2.37655 | 2.87E-06  | 1.71604  | 0.00109693 |
| A_51_P187421 | RPGRIP1L      | RPGRIP1-like                                                   | 2.38389 | 0.0004165 | 1.99646  | 0.00352783 |
| A_52_P26794  | BASP1         | brain abundant, membrane attached signal protein 1             | 2.39103 | 9.94E-06  | -1.53453 | 0.0133776  |
| A_51_P273538 | SYCE2         | synaptonemal complex central element protein 2                 | 2.39192 | 4.03E-10  | -1.94945 | 8.44E-08   |
| A_52_P547662 | P2RY1         | purinergic receptor P2Y, G-protein coupled, 1                  | 2.39321 | 0.0003555 | 1.81659  | 0.00962976 |
| A_51_P162553 | PREX2         | phosphatidylinositol-3,4,5-trisphosphate-dependent Rac exc     | 2.39338 | 0.0033092 | 2.29778  | 0.00482439 |
| A_52_P49457  | FBXL16        | F-box and leucine-rich repeat protein 16                       | 2.39914 | 9.67E-09  | -1.87216 | 3.57E-06   |
| A_51_P296036 | Nrbp2         | nuclear receptor binding protein 2                             | 2.4     | 3.41E-10  | -3.5441  | 6.89E-14   |
| A_52_P785927 | 3110035C09Rik | RIKEN cDNA 3110035C09 gene                                     | 2.40219 | 0.0015949 | 2.11832  | 0.00570213 |
| A_51_P506899 | HSPA12A       | heat shock 70kDa protein 12A                                   | 2.40274 | 0.0012336 | -2.13397 | 0.00429703 |
| A_51_P168203 | AIG1          | androgen-induced 1                                             | 2.40326 | 2.11E-07  | 4.07897  | 1.32E-11   |
| A_52_P181605 | Ccdc50        | coiled-coil domain containing 50                               | 2.40787 | 7.30E-09  | 1.63487  | 9.37E-05   |
| A_51_P114634 | AMZ1          | archaelysin family metallopeptidase 1                          | 2.40835 | 7.46E-13  | 1.67695  | 6.53E-08   |
| A_52_P301035 | RCCD1         | RCC1 domain containing 1                                       | 2.40924 | 3.34E-10  | -1.5322  | 8.66E-05   |
| A_52_P144964 | CEP83         | centrosomal protein 83kDa                                      | 2.41098 | 6.49E-10  | 3.46059  | 2.57E-13   |
| A_52_P671769 | ARHGAP18      | Rho GTPase activating protein 18                               | 2.41118 | 3.45E-05  | -1.71842 | 0.00525556 |
| A_52_P349477 | MAPK8IP1      | mitogen-activated protein kinase 8 interacting protein 1       | 2.41525 | 1.67E-09  | -4.14188 | 2.99E-14   |
| A_52_P212756 | TOR1AIP2      | torsin A interacting protein 2                                 | 2.41729 | 6.76E-06  | 1.58206  | 0.00777927 |
| A_52_P242544 | DSP           | desmoplakin                                                    | 2.42383 | 2.77E-05  | 1.88393  | 0.00128874 |
| A_52_P446625 | CEP170B       | centrosomal protein 170B                                       | 2.43089 | 5.89E-07  | 5.00655  | 2.99E-12   |
| A_52_P418477 | Tpm2          | tropomyosin 2, beta                                            | 2.43728 | 1.22E-09  | -2.43089 | 1.29E-09   |
| A_51_P234044 | C16orf74      | chromosome 16 open reading frame 74                            | 2.43738 | 1.98E-08  | -2.66106 | 3.05E-09   |
| A_51_P512969 | CILP2         | cartilage intermediate layer protein 2                         | 2.43818 | 1.33E-07  | 2.68953  | 1.88E-08   |
| A_52_P209383 | TGFB111       | transforming growth factor beta 1 induced transcript 1         | 2.44022 | 0.0059917 | 6.72647  | 7.10E-07   |
| A_52_P341489 | C5orf28       | chromosome 5 open reading frame 28                             | 2.44143 | 2.48E-12  | 1.71377  | 1.04E-07   |
| A_51_P502964 | TMEM63A       | transmembrane protein 63A                                      | 2.44175 | 8.82E-10  | 2.25896  | 5.77E-09   |
| A_52_P613596 | VAV3          | vav 3 guanine nucleotide exchange factor                       | 2.44762 | 0.0052836 | 2.26454  | 0.0100299  |
| A_52_P452689 | ATF3          | activating transcription factor 3                              | 2.44824 | 5.39E-12  | 19.6188  | 1.46E-25   |
| A_51_P440535 | MLKL          | mixed lineage kinase domain-like                               | 2.4508  | 0.0006626 | 3.09551  | 4.45E-05   |
| A_51_P263004 | BCL11A        | B-cell CLL/lymphoma 11A (zinc finger protein)                  | 2.45096 | 3.23E-08  | -2.41618 | 4.38E-08   |
| A_51_P467953 | LRFN4         | leucine rich repeat and fibronectin type III domain containin  | 2.45734 | 2.52E-12  | 1.54203  | 4.68E-06   |
| A_52_P151320 | TNFAIP8L1     | tumor necrosis factor, alpha-induced protein 8-like 1          | 2.4738  | 6.72E-14  | -3.83846 | 2.85E-18   |
| A_52_P561690 | KIAA1614      | KIAA1614                                                       | 2.47402 | 0.0002532 | 5.30074  | 2.12E-08   |
| A_52_P602406 | ZDHHC3        | zinc finger, DHHC-type containing 3                            | 2.47527 | 8.25E-05  | -4.9221  | 8.26E-09   |

|              |          |                                                              |         |           |          |            |
|--------------|----------|--------------------------------------------------------------|---------|-----------|----------|------------|
| A_51_P240476 | DNAH11   | dynein, axonemal, heavy chain 11                             | 2.47682 | 4.29E-05  | 2.08312  | 0.00052562 |
| A_51_P189198 | PARD3    | par-3 family cell polarity regulator                         | 2.47751 | 0.0002251 | 1.86295  | 0.00714802 |
| A_51_P159201 | JUNB     | jun B proto-oncogene                                         | 2.48022 | 3.40E-11  | 2.27773  | 2.98E-10   |
| A_52_P532559 | THRB     | thyroid hormone receptor, beta                               | 2.48114 | 1.98E-05  | 3.26538  | 3.06E-07   |
| A_52_P681310 | PLAUR    | plasminogen activator, urokinase receptor                    | 2.48167 | 2.48E-14  | 1.86591  | 1.66E-10   |
| A_51_P168894 | ANO1     | anoctamin 1, calcium activated chloride channel              | 2.48216 | 0.0001139 | -3.16878 | 4.26E-06   |
| A_52_P5891   | FAM101B  | family with sequence similarity 101, member B                | 2.48255 | 3.13E-05  | 1.75247  | 0.00486436 |
| A_51_P389864 | B3GNT9   | UDP-GlcNAc:betaGal beta-1,3-N-acetylglucosaminyltransferase  | 2.48541 | 0.0002935 | 3.46588  | 4.80E-06   |
| A_52_P196105 | TTYH3    | tweety family member 3                                       | 2.48749 | 1.19E-09  | -1.7741  | 5.45E-06   |
| A_52_P569539 | NFKB1    | nuclear factor of kappa light polypeptide gene enhancer in B | 2.48835 | 1.56E-07  | 5.4157   | 2.97E-13   |
| A_51_P271984 | TMEM45B  | transmembrane protein 45B                                    | 2.501   | 9.65E-05  | 6.85901  | 2.67E-10   |
| A_52_P35217  | BTG2     | BTG family, member 2                                         | 2.50152 | 7.79E-07  | 18.8237  | 3.01E-18   |
| A_52_P290211 | MEIS2    | Meis homeobox 2                                              | 2.50555 | 4.59E-07  | -1.59119 | 0.00266565 |
| A_52_P64687  | CAMK2N1  | calcium/calmodulin-dependent protein kinase II inhibitor 1   | 2.509   | 3.45E-07  | -2.08682 | 1.22E-05   |
| A_51_P206405 | PTPRZ1   | protein tyrosine phosphatase, receptor-type, Z polypeptide   | 2.50975 | 5.52E-06  | -3.89778 | 5.37E-09   |
| A_52_P127335 | RPGRIP1L | RPGRIP1-like                                                 | 2.51064 | 0.0028701 | 2.55647  | 0.00243573 |
| A_51_P101460 | DSP      | desmoplakin                                                  | 2.51148 | 5.18E-08  | 1.61343  | 0.00067552 |
| A_51_P332309 | EOMES    | eomesodermin                                                 | 2.51314 | 1.83E-07  | -7.17078 | 1.11E-14   |
| A_52_P994653 |          |                                                              | 2.51321 | 6.25E-05  | -1.71092 | 0.0105604  |
| A_51_P258766 | SMO      | smoothened, frizzled class receptor                          | 2.51362 | 2.07E-12  | 1.61198  | 1.29E-06   |
| A_51_P428595 | CSPP1    | centrosome and spindle pole associated protein 1             | 2.51372 | 5.87E-10  | 2.49619  | 6.90E-10   |
| A_52_P486774 | COBLL1   | cordon-bleu WH2 repeat protein-like 1                        | 2.51461 | 0.0001187 | 3.88856  | 3.91E-07   |
| A_51_P266224 | LIMD1    | LIM domains containing 1                                     | 2.51647 | 3.84E-10  | -1.51934 | 0.00021226 |
| A_51_P195783 | NEIL3    | nei-like DNA glycosylase 3                                   | 2.51682 | 0.0002056 | -2.1447  | 0.00147384 |
| A_52_P603668 | AIG1     | androgen-induced 1                                           | 2.52196 | 3.04E-09  | 2.24731  | 4.18E-08   |
| A_51_P320281 | IRX2     | iroquois homeobox 2                                          | 2.52271 | 3.12E-08  | 1.78117  | 6.05E-05   |
| A_51_P340699 | RASL11A  | RAS-like, family 11, member A                                | 2.53056 | 2.54E-08  | 1.63165  | 0.00038957 |
| A_52_P521583 | ZC3H4    | zinc finger CCCH-type containing 4                           | 2.5322  | 4.24E-07  | 1.70409  | 0.00080309 |
| A_52_P121491 | MSRB3    | methionine sulfoxide reductase B3                            | 2.53831 | 5.61E-05  | 1.96399  | 0.00185904 |
| A_52_P524426 | EPB41L1  | erythrocyte membrane protein band 4.1-like 1                 | 2.54565 | 5.27E-11  | 2.22011  | 1.60E-09   |
| A_51_P188054 | EBF1     | early B-cell factor 1                                        | 2.55395 | 3.34E-06  | -3.35183 | 4.08E-08   |
| A_51_P204913 | BAG2     | BCL2-associated athanogene 2                                 | 2.56356 | 7.11E-12  | -1.81296 | 1.02E-07   |
| A_51_P102987 | PENK     | proenkephalin                                                | 2.56535 | 4.72E-10  | 2.27252  | 8.11E-09   |
| A_52_P650180 | NIPAL2   | NIPA-like domain containing 2                                | 2.56885 | 0.0004339 | 4.18321  | 1.60E-06   |
| A_51_P276418 | RAB6B    | RAB6B, member RAS oncogene family                            | 2.57054 | 1.81E-11  | -5.27186 | 1.61E-17   |
| A_51_P157840 | CHST1    | carbohydrate (keratan sulfate Gal-6) sulfotransferase 1      | 2.57404 | 7.30E-09  | 1.8188   | 1.84E-05   |
| A_51_P215106 | FSTL1    | follistatin-like 1                                           | 2.57541 | 1.64E-09  | -2.39618 | 8.23E-09   |
| A_52_P213696 | FNDC5    | fibronectin type III domain containing 5                     | 2.57694 | 6.77E-07  | 1.99829  | 7.03E-05   |
| A_51_P309874 |          |                                                              | 2.5819  | 0.0056005 | 7.1278   | 1.03E-06   |
| A_52_P139727 | ATF4     | activating transcription factor 4                            | 2.58596 | 1.61E-14  | 4.57446  | 8.45E-20   |
| A_52_P593110 | PTBP2    | polypyrimidine tract binding protein 2                       | 2.58677 | 1.17E-05  | 3.99265  | 1.95E-08   |
| A_51_P372186 | ZNF467   | zinc finger protein 467                                      | 2.59483 | 2.69E-07  | 2.69163  | 1.37E-07   |
| A_52_P56471  | EGFR     | epidermal growth factor receptor                             | 2.59587 | 3.04E-06  | 6.52192  | 4.70E-12   |
| A_52_P315976 | Tpm2     | tropomyosin 2, beta                                          | 2.60078 | 2.67E-10  | -2.52175 | 5.40E-10   |
| A_51_P196925 | CX3CL1   | chemokine (C-X3-C motif) ligand 1                            | 2.6067  | 2.32E-08  | 1.86571  | 2.81E-05   |
| A_52_P373912 |          |                                                              | 2.61103 | 2.82E-06  | 10.4607  | 2.20E-14   |
| A_51_P420841 | LRRRC8B  | leucine rich repeat containing 8 family, member B            | 2.61556 | 6.57E-08  | 3.25837  | 1.11E-09   |
| A_51_P415475 | DOK4     | docking protein 4                                            | 2.6196  | 9.60E-14  | -1.61087 | 3.16E-07   |
| A_51_P424569 | TBC1D12  | TBC1 domain family, member 12                                | 2.62123 | 0.0001623 | 1.89534  | 0.00739802 |
| A_51_P497280 | DBNDD1   | dysbindin (dystrobrevin binding protein 1) domain containin  | 2.62577 | 1.64E-07  | -2.13227 | 8.80E-06   |
| A_51_P225592 | Tpm4     | tropomyosin 4                                                | 2.62764 | 2.70E-14  | -1.62027 | 1.07E-07   |
| A_51_P120137 | RMDN2    | regulator of microtubule dynamics 2                          | 2.62908 | 2.52E-09  | 1.51058  | 0.00103346 |
| A_51_P507602 | Clca3b   | chloride channel accessory 3B                                | 2.63098 | 4.63E-06  | 5.19938  | 2.15E-10   |

|               |               |                                                                |         |           |          |            |
|---------------|---------------|----------------------------------------------------------------|---------|-----------|----------|------------|
| A_52_P635388  | MS4A6A        | membrane-spanning 4-domains, subfamily A, member 6A            | 2.63114 | 0.0002121 | 2.10168  | 0.00288109 |
| A_51_P210885  | SNED1         | sushi, nidogen and EGF-like domains 1                          | 2.63646 | 0.006927  | -3.82195 | 0.00038635 |
| A_52_P666026  | GATSL2        | GATS protein-like 2                                            | 2.64327 | 0.0014018 | -2.202   | 0.0075618  |
| A_51_P233101  | LTBP3         | latent transforming growth factor beta binding protein 3       | 2.64646 | 2.43E-10  | -2.61509 | 3.17E-10   |
| A_51_P302346  | OR8D4         | olfactory receptor, family 8, subfamily D, member 4            | 2.64938 | 1.34E-09  | -4.12819 | 2.79E-13   |
| A_51_P188046  | DYNC111       | dynein, cytoplasmic 1, intermediate chain 1                    | 2.66061 | 0.0009125 | 2.30638  | 0.00369951 |
| A_51_P269216  | ATF5          | activating transcription factor 5                              | 2.66506 | 1.64E-14  | 2.50307  | 8.37E-14   |
| A_51_P250378  | SLC30A1       | solute carrier family 30 (zinc transporter), member 1          | 2.68167 | 2.20E-13  | 1.80179  | 1.87E-08   |
| A_51_P255657  | 2210011C24Rik | RIKEN cDNA 2210011C24 gene                                     | 2.69827 | 8.94E-14  | -3.77998 | 5.67E-17   |
| A_52_P628445  | PTPRR         | protein tyrosine phosphatase, receptor type, R                 | 2.70267 | 0.0059627 | 4.44874  | 0.00011869 |
| A_51_P172952  | C8orf34       | chromosome 8 open reading frame 34                             | 2.70959 | 5.15E-08  | 3.92337  | 7.84E-11   |
| A_51_P219074  | ID2           | inhibitor of DNA binding 2, dominant negative helix-loop-he    | 2.71259 | 3.55E-08  | 5.67874  | 1.96E-13   |
| A_52_P671525  | ZMAT1         | zinc finger, matrin-type 1                                     | 2.71477 | 0.0001094 | 8.48227  | 2.21E-10   |
| A_51_P250797  | GLRB          | glycine receptor, beta                                         | 2.73293 | 8.19E-05  | 10.3169  | 2.18E-11   |
| A_52_P257919  | SOGA1         | suppressor of glucose, autophagy associated 1                  | 2.73898 | 2.48E-12  | 4.40244  | 1.83E-16   |
| A_51_P134812  | CHAC1         | ChaC glutathione-specific gamma-glutamylcyclotransferase       | 2.7415  | 1.50E-13  | 2.4673   | 2.09E-12   |
| A_51_P247098  | RALGAPB       | Ral GTPase activating protein, beta subunit (non-catalytic)    | 2.74238 | 6.13E-05  | 1.7494   | 0.0143449  |
| A_51_P179881  | LCA5L         | Leber congenital amaurosis 5-like                              | 2.74333 | 7.28E-09  | 12.3229  | 2.88E-18   |
| A_52_P100341  | ZNF334        | zinc finger protein 334                                        | 2.74807 | 2.70E-05  | 3.40986  | 1.48E-06   |
| A_52_P637282  | WIPF1         | WAS/WASL interacting protein family, member 1                  | 2.74924 | 1.02E-07  | -1.62763 | 0.00195791 |
| A_52_P513477  | DZIP3         | DAZ interacting zinc finger protein 3                          | 2.74939 | 2.49E-05  | 2.24703  | 0.000383   |
| A_51_P246066  | SLAMF9        | SLAM family member 9                                           | 2.74955 | 1.89E-05  | 4.07276  | 9.13E-08   |
| A_51_P513991  | SPAG4         | sperm associated antigen 4                                     | 2.75873 | 3.51E-14  | 2.16572  | 2.23E-11   |
| A_52_P305230  | IGSF21        | immunoglobulin superfamily, member 21                          | 2.76172 | 4.09E-15  | -5.55705 | 4.64E-21   |
| A_52_P841     | ZBTB10        | zinc finger and BTB domain containing 10                       | 2.76736 | 6.35E-05  | 6.80427  | 1.33E-09   |
| A_51_P364639  | KRT71         | keratin 71, type II                                            | 2.76764 | 6.84E-09  | 3.03807  | 1.14E-09   |
| A_52_P453374  | LRRN4CL       | LRRN4 C-terminal like                                          | 2.77486 | 2.47E-09  | 2.66437  | 5.64E-09   |
| A_51_P285020  | A730049H05Rik | RIKEN cDNA A730049H05 gene                                     | 2.77512 | 1.84E-06  | -3.45352 | 6.28E-08   |
| A_51_P152203  | ZNF519        | zinc finger protein 519                                        | 2.79479 | 0.0004014 | 2.14448  | 0.00587482 |
| A_51_P262998  | BCL11A        | B-cell CLL/lymphoma 11A (zinc finger protein)                  | 2.79659 | 2.12E-12  | -3.99426 | 1.46E-15   |
| A_51_P118300  | SNCG          | synuclein, gamma (breast cancer-specific protein 1)            | 2.79973 | 8.53E-13  | 8.31758  | 8.03E-21   |
| A_51_P178692  | ENC1          | ectodermal-neural cortex 1 (with BTB domain)                   | 2.80296 | 1.74E-10  | 1.73723  | 1.54E-05   |
| A_52_P1155947 |               |                                                                | 2.80402 | 4.69E-05  | -1.94098 | 0.00446093 |
| A_52_P384264  | Zfp185        | zinc finger protein 185                                        | 2.80824 | 5.47E-09  | -2.11482 | 1.88E-06   |
| A_52_P113295  | TENM1         | teneurin transmembrane protein 1                               | 2.82063 | 0.0030976 | -2.86482 | 0.00273755 |
| A_51_P284476  | GPM6B         | glycoprotein M6B                                               | 2.82154 | 0.0001336 | -3.74267 | 4.99E-06   |
| A_51_P143805  | TMEM42        | transmembrane protein 42                                       | 2.82161 | 2.17E-08  | 2.07572  | 8.74E-06   |
| A_51_P160439  | CRYBG3        | beta-gamma crystallin domain containing 3                      | 2.82612 | 3.41E-08  | -5.0477  | 2.58E-12   |
| A_52_P384049  | TTPAL         | tocopherol (alpha) transfer protein-like                       | 2.82788 | 4.19E-07  | 1.81201  | 0.00082451 |
| A_51_P392242  | EGFR          | epidermal growth factor receptor                               | 2.83209 | 0.0081174 | 5.57134  | 6.26E-05   |
| A_52_P58208   | Muc1          | mucin 1, transmembrane                                         | 2.83278 | 0.0002119 | 2.30215  | 0.00200774 |
| A_52_P300730  | Hmga2         | high mobility group AT-hook 2                                  | 2.8332  | 1.05E-08  | -2.2535  | 9.72E-07   |
| A_52_P432881  | SLC19A3       | solute carrier family 19 (thiamine transporter), member 3      | 2.83528 | 7.98E-05  | 1.87008  | 0.00981689 |
| A_52_P473966  | KDELRL3       | KDEL (Lys-Asp-Glu-Leu) endoplasmic reticulum protein reten     | 2.84383 | 3.67E-13  | 1.8884   | 1.96E-08   |
| A_51_P381015  | EVX1          | even-skipped homeobox 1                                        | 2.84713 | 6.10E-05  | -2.00045 | 0.00414158 |
| A_51_P288315  | Hmga2         | high mobility group AT-hook 2                                  | 2.84835 | 4.72E-06  | -1.70218 | 0.00771103 |
| A_51_P442097  | SLC41A3       | solute carrier family 41, member 3                             | 2.85984 | 4.66E-10  | -2.95009 | 2.49E-10   |
| A_52_P237048  | PRMT6         | protein arginine methyltransferase 6                           | 2.8613  | 1.41E-09  | 1.93487  | 6.34E-06   |
| A_52_P372165  | RPSA          | ribosomal protein SA                                           | 2.86943 | 1.73E-11  | 2.58632  | 1.75E-10   |
| A_52_P418884  | NEDD9         | neural precursor cell expressed, developmentally down-regu     | 2.87607 | 0.0036911 | 4.42611  | 0.00012087 |
| A_52_P477668  | SRGAP1        | SLIT-ROBO Rho GTPase activating protein 1                      | 2.87778 | 1.23E-09  | 1.76094  | 5.41E-05   |
| A_51_P435410  | GRID2IP       | glutamate receptor, ionotropic, delta 2 (Grid2) interacting pr | 2.8788  | 0.0013487 | 2.61624  | 0.00309325 |
| A_51_P221762  | EPHA4         | EPH receptor A4                                                | 2.88628 | 2.02E-13  | 1.69513  | 4.87E-07   |

|               |                     |                                                              |         |           |          |            |
|---------------|---------------------|--------------------------------------------------------------|---------|-----------|----------|------------|
| A_52_P600808  | SMCR8               | Smith-Magenis syndrome chromosome region, candidate 8        | 2.88726 | 4.10E-12  | 6.13558  | 6.34E-18   |
| A_52_P498193  | ALDH1L2             | aldehyde dehydrogenase 1 family, member L2                   | 2.88752 | 2.14E-10  | -1.77119 | 1.61E-05   |
| A_51_P448325  | ESAM                | endothelial cell adhesion molecule                           | 2.88904 | 2.20E-10  | -3.7106  | 1.81E-12   |
| A_51_P177371  | PRND                | prion protein 2 (duplet)                                     | 2.89159 | 3.33E-05  | 2.82975  | 4.38E-05   |
| A_52_P1100724 |                     |                                                              | 2.89256 | 9.26E-08  | 10.1167  | 2.70E-15   |
| A_51_P278334  | VLDLR               | very low density lipoprotein receptor                        | 2.90694 | 4.07E-08  | 2.19591  | 7.21E-06   |
| A_51_P312795  | KCNJ8               | potassium channel, inwardly rectifying subfamily J, member   | 2.91409 | 1.16E-05  | -1.84456 | 0.00502132 |
| A_51_P427540  | 4930422N03Rik       | RIKEN cDNA 4930422N03 gene                                   | 2.915   | 0.0014754 | 4.8428   | 1.61E-05   |
| A_52_P553316  | SNRK                | SNF related kinase                                           | 2.91548 | 3.92E-14  | 1.85746  | 8.59E-09   |
| A_51_P493987  | MOXD1               | monooxygenase, DBH-like 1                                    | 2.92819 | 4.05E-12  | 2.7111   | 2.24E-11   |
| A_52_P590781  | FAM13C              | family with sequence similarity 13, member C                 | 2.93181 | 3.37E-08  | 2.44636  | 9.10E-07   |
| A_51_P219109  | IL12RB1             | interleukin 12 receptor, beta 1                              | 2.94473 | 6.50E-10  | -2.14841 | 5.04E-07   |
| A_51_P513992  | SPAG4               | sperm associated antigen 4                                   | 2.94865 | 6.58E-10  | 1.94667  | 4.89E-06   |
| A_52_P218584  | PHF20L1             | PHD finger protein 20-like 1                                 | 2.97477 | 9.61E-10  | 2.76921  | 3.92E-09   |
| A_52_P459929  | ITGA1               | integrin, alpha 1                                            | 2.98077 | 4.00E-05  | -3.83332 | 1.90E-06   |
| A_51_P422257  | EMX1                | empty spiracles homeobox 1                                   | 2.98103 | 1.07E-08  | 2.12982  | 6.59E-06   |
| A_51_P402617  | NKX6-2              | NK6 homeobox 2                                               | 2.98645 | 5.12E-12  | 2.52818  | 2.10E-10   |
| A_52_P620898  | AJAP1               | adherens junctions associated protein 1                      | 2.98988 | 1.55E-06  | -1.89496 | 0.00143028 |
| A_52_P648433  | TEX13B              | testis expressed 13B                                         | 3.01786 | 6.11E-07  | 9.79673  | 1.40E-13   |
| A_52_P140005  | NIPAL1              | NIPA-like domain containing 1                                | 3.021   | 1.33E-05  | -2.88337 | 2.45E-05   |
| A_51_P448178  | KCTD8               | potassium channel tetramerization domain containing 8        | 3.0216  | 4.36E-05  | 19.5217  | 2.24E-13   |
| A_52_P488437  | PLEK2               | pleckstrin 2                                                 | 3.02695 | 2.15E-16  | 4.76107  | 2.64E-20   |
| A_52_P230938  | Ly6a (includes othe | lymphocyte antigen 6 complex, locus A                        | 3.03674 | 0.0001209 | 3.36402  | 3.94E-05   |
| A_52_P402897  | CDH4                | cadherin 4, type 1, R-cadherin (retinal)                     | 3.03966 | 1.48E-08  | -5.47608 | 1.45E-12   |
| A_51_P467224  | FBN1                | fibrillin 1                                                  | 3.04166 | 2.69E-06  | 2.62073  | 2.27E-05   |
| A_51_P424893  | XIAP                | X-linked inhibitor of apoptosis, E3 ubiquitin protein ligase | 3.04417 | 0.0002432 | 4.24924  | 7.85E-06   |
| A_51_P165882  | SLC22A18            | solute carrier family 22, member 18                          | 3.04982 | 3.84E-11  | -2.42064 | 5.43E-09   |
| A_52_P575505  | PEX2                | peroxisomal biogenesis factor 2                              | 3.05266 | 9.41E-10  | 3.04039  | 1.02E-09   |
| A_52_P490910  | FNDC4               | fibronectin type III domain containing 4                     | 3.06865 | 1.66E-11  | -2.19891 | 2.79E-08   |
| A_51_P424338  | NQO1                | NAD(P)H dehydrogenase, quinone 1                             | 3.0757  | 4.13E-11  | -2.19542 | 6.48E-08   |
| A_52_P398122  | IRX2                | iroquois homeobox 2                                          | 3.08095 | 4.13E-10  | 1.9764   | 4.56E-06   |
| A_52_P584293  | ATRNL1              | attractin-like 1                                             | 3.08939 | 1.99E-11  | -1.6885  | 2.91E-05   |
| A_51_P321531  | PURG                | purine-rich element binding protein G                        | 3.09313 | 2.44E-14  | -2.4503  | 6.20E-12   |
| A_51_P358152  | SEPN1               | selenoprotein N, 1                                           | 3.09977 | 2.81E-06  | 2.04681  | 0.00093821 |
| A_52_P521937  | ZNF519              | zinc finger protein 519                                      | 3.10423 | 2.12E-11  | 1.97679  | 5.69E-07   |
| A_52_P461922  | ISLR2               | immunoglobulin superfamily containing leucine-rich repeat    | 3.10859 | 0.0041087 | 3.17002  | 0.00358708 |
| A_52_P659312  | SPSB4               | splA/ryanodine receptor domain and SOCS box containing 4     | 3.11092 | 4.70E-16  | -3.47131 | 4.39E-17   |
| A_52_P478444  | Gm9885              | predicted gene 9885                                          | 3.1131  | 1.28E-12  | -2.64301 | 4.61E-11   |
| A_51_P478555  | CITED2              | Cbp/p300-interacting transactivator, with Glu/Asp-rich carb  | 3.11425 | 1.15E-07  | 1.64512  | 0.00451624 |
| A_51_P407165  | ABHD5               | abhydrolase domain containing 5                              | 3.1307  | 1.82E-11  | 8.48619  | 3.20E-18   |
| A_51_P250422  | SPRY4               | sprouty RTK signaling antagonist 4                           | 3.13892 | 8.76E-10  | -4.5217  | 1.79E-12   |
| A_51_P308362  | UGT1A6              | UDP glucuronosyltransferase 1 family, polypeptide A6         | 3.16556 | 3.43E-06  | 13.8361  | 1.67E-13   |
| A_52_P678837  | RTTN                | rotatin                                                      | 3.17161 | 7.23E-08  | -3.33131 | 3.30E-08   |
| A_51_P328613  | FCGR2A              | Fc fragment of IgG, low affinity IIa, receptor (CD32)        | 3.17688 | 7.52E-07  | 2.78701  | 5.18E-06   |
| A_52_P649623  | SEMA3D              | sema domain, immunoglobulin domain (Ig), short basic dom     | 3.18361 | 0.0010154 | 2.30275  | 0.0133339  |
| A_51_P156274  | LTBR                | lymphotoxin beta receptor (TNFR superfamily, member 3)       | 3.20924 | 8.45E-09  | 1.66591  | 0.00143041 |
| A_52_P143757  | MON1B               | MON1 secretory trafficking family member B                   | 3.2156  | 1.21E-11  | 1.71472  | 2.33E-05   |
| A_52_P195839  | CTSC                | cathepsin C                                                  | 3.25173 | 2.38E-15  | 1.68308  | 1.71E-07   |
| A_52_P477836  | CAPZA2              | capping protein (actin filament) muscle Z-line, alpha 2      | 3.26682 | 0.0005794 | 3.98331  | 0.00010021 |
| A_52_P478103  | NDNF                | neuron-derived neurotrophic factor                           | 3.28678 | 4.92E-06  | -2.3555  | 0.0003611  |
| A_51_P155445  | ABCB1               | ATP-binding cassette, sub-family B (MDR/TAP), member 1       | 3.29413 | 1.46E-07  | 9.29913  | 2.16E-13   |
| A_51_P501897  | PITX2               | paired-like homeodomain 2                                    | 3.29684 | 7.88E-06  | 3.79615  | 1.37E-06   |
| A_52_P256421  | FAM129A             | family with sequence similarity 129, member A                | 3.30419 | 1.33E-14  | -1.57154 | 6.82E-06   |

|              |                     |                                                               |         |           |          |            |
|--------------|---------------------|---------------------------------------------------------------|---------|-----------|----------|------------|
| A_51_P509669 | UAP1L1              | UDP-N-acetylglucosamine pyrophosphorylase 1 like 1            | 3.30518 | 6.72E-15  | 3.61767  | 1.07E-15   |
| A_52_P273821 | ABHD5               | abhydrolase domain containing 5                               | 3.30848 | 9.70E-11  | 5.87183  | 9.29E-15   |
| A_51_P309917 | ITGA8               | integrin, alpha 8                                             | 3.37669 | 3.35E-09  | 9.38077  | 2.57E-15   |
| A_52_P496608 | PSD3                | pleckstrin and Sec7 domain containing 3                       | 3.37893 | 8.06E-07  | 2.21441  | 0.00030629 |
| A_51_P411225 | WIPF1               | WAS/WASL interacting protein family, member 1                 | 3.40019 | 1.35E-12  | -1.59318 | 8.59E-05   |
| A_51_P209921 | KIAA0408            | KIAA0408                                                      | 3.40217 | 2.55E-14  | -3.86204 | 2.18E-15   |
| A_51_P150876 | LYPD3               | LY6/PLAUR domain containing 3                                 | 3.41595 | 1.27E-06  | -2.12114 | 0.00080486 |
| A_51_P467086 | Defa3 (includes oth | defensin, alpha, 3                                            | 3.42191 | 6.71E-12  | 6.11927  | 5.31E-16   |
| A_51_P385786 | ID1                 | inhibitor of DNA binding 1, dominant negative helix-loop-he   | 3.43934 | 3.43E-11  | 2.69596  | 3.80E-09   |
| A_52_P533809 | ID1                 | inhibitor of DNA binding 1, dominant negative helix-loop-he   | 3.44491 | 3.39E-11  | 2.42643  | 3.52E-08   |
| A_51_P447835 | PLA2G7              | phospholipase A2, group VII (platelet-activating factor acety | 3.45028 | 3.80E-14  | 2.01062  | 1.39E-08   |
| A_51_P494822 | STAG3               | stromal antigen 3                                             | 3.47441 | 1.09E-14  | -1.72023 | 6.27E-07   |
| A_51_P170178 | B3GNT8              | UDP-GlcNAc:betaGal beta-1,3-N-acetylglucosaminyltransfer:     | 3.47772 | 1.62E-08  | 10.9836  | 6.15E-15   |
| A_51_P501664 | PREX2               | phosphatidylinositol-3,4,5-trisphosphate-dependent Rac exc    | 3.48542 | 2.92E-08  | 6.24551  | 8.68E-12   |
| A_51_P184991 | WDR64               | WD repeat domain 64                                           | 3.48736 | 5.66E-08  | 11.0604  | 3.09E-14   |
| A_51_P152211 | ZNF519              | zinc finger protein 519                                       | 3.51161 | 2.67E-09  | 2.83695  | 9.95E-08   |
| A_52_P678833 | DCP2                | decapping mRNA 2                                              | 3.52927 | 4.66E-16  | 1.8076   | 1.63E-08   |
| A_51_P510441 | SUV39H1             | suppressor of variegation 3-9 homolog 1 (Drosophila)          | 3.54128 | 7.70E-16  | 4.24725  | 2.43E-17   |
| A_52_P392517 | BMP2K               | BMP2 inducible kinase                                         | 3.57574 | 7.65E-07  | 1.84727  | 0.00500133 |
| A_52_P860172 | NBN                 | nibrin                                                        | 3.57888 | 0.0001255 | 7.80605  | 8.45E-08   |
| A_51_P211436 | GPR83               | G protein-coupled receptor 83                                 | 3.58929 | 9.56E-13  | -4.20434 | 5.72E-14   |
| A_51_P171772 | BCL11B              | B-cell CLL/lymphoma 11B (zinc finger protein)                 | 3.59518 | 2.06E-13  | 3.07249  | 4.60E-12   |
| A_51_P271503 | IL1R1               | interleukin 1 receptor, type I                                | 3.61413 | 7.00E-10  | 3.72077  | 4.35E-10   |
| A_52_P370268 | Crisp1/Crisp3       | cysteine-rich secretory protein 1                             | 3.63196 | 9.81E-12  | 5.4608   | 1.36E-14   |
| A_51_P119429 | NCKAP1L             | NCK-associated protein 1-like                                 | 3.64765 | 5.25E-11  | 4.40326  | 2.34E-12   |
| A_51_P454196 | SH2D4A              | SH2 domain containing 4A                                      | 3.66273 | 1.40E-07  | 3.46383  | 3.06E-07   |
| A_51_P272553 | BHLHE40             | basic helix-loop-helix family, member e40                     | 3.66349 | 1.32E-11  | -1.93536 | 6.11E-06   |
| A_52_P311263 | LONRF2              | LON peptidase N-terminal domain and ring finger 2             | 3.69278 | 1.55E-11  | -7.31694 | 5.66E-16   |
| A_52_P860288 | PPIA                | peptidylprolyl isomerase A (cyclophilin A)                    | 3.70557 | 0.0001917 | 4.16755  | 6.72E-05   |
| A_51_P452714 | KCNMB4              | potassium channel subfamily M regulatory beta subunit 4       | 3.73155 | 5.19E-05  | 2.25023  | 0.00653695 |
| A_52_P373852 | FOXO3               | forkhead box O3                                               | 3.74222 | 0.0007571 | 3.59544  | 0.00102467 |
| A_52_P106259 | EGFR                | epidermal growth factor receptor                              | 3.75464 | 3.68E-13  | 20.3429  | 2.01E-22   |
| A_52_P296864 | 3110045C21Rik       | RIKEN cDNA 3110045C21 gene                                    | 3.7773  | 1.29E-05  | -2.09087 | 0.00667485 |
| A_51_P380432 | SCX                 | scleraxis bHLH transcription factor                           | 3.77814 | 2.01E-11  | 16.7041  | 1.40E-19   |
| A_51_P143682 | ZNF318              | zinc finger protein 318                                       | 3.78676 | 4.12E-12  | -1.59072 | 0.000414   |
| A_52_P302544 | COL8A2              | collagen, type VIII, alpha 2                                  | 3.82095 | 8.71E-07  | -3.56327 | 2.09E-06   |
| A_51_P394394 | TSPAN2              | tetraspanin 2                                                 | 3.83619 | 5.04E-13  | 1.67432  | 4.60E-05   |
| A_51_P450623 | PHLDA2              | pleckstrin homology-like domain, family A, member 2           | 3.93174 | 2.06E-11  | -2.03953 | 5.76E-06   |
| A_52_P350786 | PHLDA2              | pleckstrin homology-like domain, family A, member 2           | 3.93546 | 1.19E-12  | -2.33631 | 3.59E-08   |
| A_52_P1174   | GAL3ST4             | galactose-3-O-sulfotransferase 4                              | 3.93764 | 1.07E-08  | 4.29258  | 3.15E-09   |
| A_51_P516006 | NTRK2               | neurotrophic tyrosine kinase, receptor, type 2                | 3.93808 | 2.11E-07  | 7.14132  | 1.60E-10   |
| A_52_P167357 | RAB40B              | RAB40B, member RAS oncogene family                            | 3.94838 | 0.006804  | 4.5695   | 0.00313161 |
| A_51_P240374 | COL13A1             | collagen, type XIII, alpha 1                                  | 4.01405 | 3.67E-11  | -1.65938 | 0.00070635 |
| A_52_P54609  | EML1                | echinoderm microtubule associated protein like 1              | 4.02665 | 1.93E-07  | 2.32629  | 0.0002799  |
| A_51_P416669 | KRT1                | keratin 1, type II                                            | 4.03974 | 7.42E-06  | 3.10108  | 0.00012639 |
| A_52_P233279 | VWC2                | von Willebrand factor C domain containing 2                   | 4.05672 | 6.46E-09  | 3.09971  | 3.54E-07   |
| A_52_P277378 | THAP2               | THAP domain containing, apoptosis associated protein 2        | 4.12503 | 1.18E-05  | 10.1403  | 1.96E-09   |
| A_52_P55706  | NTRK3               | neurotrophic tyrosine kinase, receptor, type 3                | 4.1322  | 1.11E-07  | -1.72803 | 0.0110238  |
| A_52_P180728 | KBTBD11             | kelch repeat and BTB (POZ) domain containing 11               | 4.13331 | 1.15E-13  | 4.33939  | 5.04E-14   |
| A_51_P235345 | SOGA1               | suppressor of glucose, autophagy associated 1                 | 4.15229 | 1.44E-15  | 3.00729  | 8.02E-13   |
| A_52_P221057 | LRRC8B              | leucine rich repeat containing 8 family, member B             | 4.16749 | 2.12E-06  | 3.37985  | 2.27E-05   |
| A_51_P437240 | EMP2                | epithelial membrane protein 2                                 | 4.21244 | 6.78E-14  | 1.54339  | 0.00030596 |
| A_52_P366994 | ZNF287              | zinc finger protein 287                                       | 4.2148  | 5.31E-05  | 3.58597  | 0.00022778 |

|               |                     |                                                             |         |          |          |            |
|---------------|---------------------|-------------------------------------------------------------|---------|----------|----------|------------|
| A_52_P637573  | EIF4G3              | eukaryotic translation initiation factor 4 gamma, 3         | 4.25417 | 1.39E-17 | 2.42293  | 2.91E-12   |
| A_52_P287338  | EIF4E3              | eukaryotic translation initiation factor 4E family member 3 | 4.2645  | 3.08E-05 | 5.19882  | 4.85E-06   |
| A_51_P511142  | Abca14              | ATP-binding cassette, sub-family A (ABC1), member 14        | 4.28623 | 4.94E-10 | 1.86355  | 0.00045958 |
| A_51_P280928  | PON2                | paraoxonase 2                                               | 4.29169 | 5.56E-15 | 3.60292  | 1.31E-13   |
| A_51_P351975  | HOXA1               | homeobox A1                                                 | 4.34155 | 3.83E-13 | 1.88174  | 7.68E-06   |
| A_51_P288916  | TMTC2               | transmembrane and tetratricopeptide repeat containing 2     | 4.35858 | 1.98E-10 | 1.55101  | 0.00745764 |
| A_51_P127475  | C1QTNF9B            | C1q and tumor necrosis factor related protein 9B            | 4.41812 | 7.14E-08 | 2.19054  | 0.0006842  |
| A_51_P455647  | CA2                 | carbonic anhydrase II                                       | 4.43039 | 1.51E-14 | 3.2738   | 3.61E-12   |
| A_52_P515629  | GPR83               | G protein-coupled receptor 83                               | 4.44653 | 2.49E-10 | -4.9364  | 5.63E-11   |
| A_51_P137388  | ZADH2               | zinc binding alcohol dehydrogenase domain containing 2      | 4.4735  | 4.60E-12 | 2.13005  | 3.39E-06   |
| A_52_P126055  | PON2                | paraoxonase 2                                               | 4.54074 | 9.13E-15 | 3.24071  | 4.03E-12   |
| A_52_P7554    | LAMA4               | laminin, alpha 4                                            | 4.56952 | 7.50E-09 | 3.2579   | 7.77E-07   |
| A_52_P609778  | MGLL                | monoglyceride lipase                                        | 4.65147 | 4.78E-16 | 1.60193  | 2.11E-05   |
| A_51_P365152  | HS3ST1              | heparan sulfate (glucosamine) 3-O-sulfotransferase 1        | 4.74106 | 2.91E-08 | 3.86448  | 3.81E-07   |
| A_51_P310348  | VAX2                | ventral anterior homeobox 2                                 | 4.74563 | 9.40E-23 | -4.3978  | 3.66E-22   |
| A_52_P517928  | Lemd1               | LEM domain containing 1                                     | 4.77097 | 3.37E-11 | -2.56413 | 7.83E-07   |
| A_52_P1033349 | Gm38499             | predicted gene, 38499                                       | 4.81333 | 6.48E-09 | 9.26776  | 3.27E-12   |
| A_51_P103000  | PITPNM1             | phosphatidylinositol transfer protein, membrane-associated  | 4.93443 | 1.48E-16 | 1.55887  | 4.25E-05   |
| A_52_P102060  | ADAM32              | ADAM metallopeptidase domain 32                             | 5.05634 | 3.56E-07 | -5.99382 | 5.87E-08   |
| A_51_P311137  | SGCE                | sarcoglycan, epsilon                                        | 5.06061 | 7.79E-18 | 2.10313  | 1.06E-09   |
| A_51_P427383  | SAMD9L              | sterile alpha motif domain containing 9-like                | 5.34142 | 2.94E-06 | 3.09286  | 0.00051435 |
| A_52_P500274  | NTRK3               | neurotrophic tyrosine kinase, receptor, type 3              | 5.37684 | 1.17E-13 | -4.05253 | 9.15E-12   |
| A_52_P27864   | SGCE                | sarcoglycan, epsilon                                        | 5.40568 | 2.82E-11 | 2.27238  | 1.89E-05   |
| A_51_P476018  | SOX7                | SRY (sex determining region Y)-box 7                        | 5.4529  | 3.20E-14 | -3.55855 | 3.04E-11   |
| A_52_P94983   | PLA2G5              | phospholipase A2, group V                                   | 5.4935  | 6.11E-19 | 1.81498  | 3.44E-08   |
| A_52_P644005  | SOX7                | SRY (sex determining region Y)-box 7                        | 5.54188 | 2.58E-08 | -3.02017 | 3.38E-05   |
| A_51_P214985  | ZNF521              | zinc finger protein 521                                     | 5.65895 | 7.57E-13 | 1.94539  | 5.63E-05   |
| A_51_P187842  | EIF4E3              | eukaryotic translation initiation factor 4E family member 3 | 5.71491 | 2.97E-06 | 5.18323  | 7.19E-06   |
| A_52_P188295  | FAM159B             | family with sequence similarity 159, member B               | 5.80841 | 2.87E-12 | 4.93355  | 2.69E-11   |
| A_51_P354706  | LEFTY1              | left-right determination factor 1                           | 6.05749 | 2.82E-19 | 2.36349  | 2.81E-11   |
| A_51_P502872  | 2200002D01Rik       | RIKEN cDNA 2200002D01 gene                                  | 6.10989 | 1.80E-18 | 2.10897  | 3.02E-09   |
| A_52_P314370  | MGAT4C              | MGAT4 family, member C                                      | 6.11719 | 8.86E-08 | 5.68367  | 1.88E-07   |
| A_52_P206002  | Defa3 (includes oth | defensin, alpha, 3                                          | 6.13258 | 7.39E-11 | 10.2236  | 2.32E-13   |
| A_52_P641195  | C4orf47             | chromosome 4 open reading frame 47                          | 6.25371 | 3.10E-11 | 13.0101  | 1.04E-14   |
| A_51_P354681  | MGAT4C              | MGAT4 family, member C                                      | 6.6208  | 8.61E-09 | 3.81186  | 3.94E-06   |
| A_51_P209261  | SQRDL               | sulfide quinone reductase-like (yeast)                      | 6.64398 | 9.71E-11 | 8.6496   | 5.06E-12   |
| A_51_P313157  | ARHGEF5             | Rho guanine nucleotide exchange factor (GEF) 5              | 6.98616 | 7.74E-22 | 2.20737  | 6.99E-12   |
| A_52_P215176  | OPN3                | opsin 3                                                     | 7.00333 | 2.59E-15 | -1.60149 | 0.00078469 |
| A_51_P139920  | MGLL                | monoglyceride lipase                                        | 7.05523 | 1.08E-16 | 1.71956  | 3.74E-05   |
| A_52_P78417   | CPE                 | carboxypeptidase E                                          | 7.18295 | 2.57E-18 | 1.70821  | 6.60E-06   |
| A_52_P578763  | Defa1               | defensin, alpha 1                                           | 7.37257 | 3.57E-16 | 14.3098  | 2.01E-19   |
| A_51_P307316  | SYDE1               | synapse defective 1, Rho GTPase, homolog 1 (C. elegans)     | 7.38784 | 1.49E-12 | 5.61463  | 4.45E-11   |
| A_51_P302377  | FGFBP1              | fibroblast growth factor binding protein 1                  | 7.58071 | 2.22E-17 | 5.71674  | 1.05E-15   |
| A_51_P309920  | ITGA8               | integrin, alpha 8                                           | 7.58712 | 2.34E-06 | 23.7432  | 5.40E-10   |
| A_51_P394833  | TSHZ1               | teashirt zinc finger homeobox 1                             | 7.65361 | 1.16E-12 | 6.689    | 5.75E-12   |
| A_51_P516833  | IGF2                | insulin-like growth factor 2                                | 7.8242  | 5.58E-17 | 1.61451  | 0.00023789 |
| A_52_P630964  | TSPAN2              | tetraspanin 2                                               | 7.89008 | 7.90E-09 | 4.0402   | 7.45E-06   |
| A_51_P183746  | PRRX2               | paired related homeobox 2                                   | 8.03405 | 6.47E-19 | -1.63699 | 2.28E-05   |
| A_52_P115787  | GRB10               | growth factor receptor-bound protein 10                     | 8.16368 | 8.15E-19 | 2.32789  | 2.68E-09   |
| A_51_P516826  | IGF2                | insulin-like growth factor 2                                | 8.70455 | 9.20E-20 | 1.7827   | 1.17E-06   |
| A_52_P638041  | Ube2dnl1/Ube2dnl    | ubiquitin-conjugating enzyme E2D N-terminal like 1          | 8.82394 | 5.06E-10 | 9.38931  | 2.77E-10   |
| A_51_P389624  | POU4F2              | POU class 4 homeobox 2                                      | 8.95754 | 2.32E-12 | -4.30328 | 1.54E-08   |
| A_51_P212420  | LAMA4               | laminin, alpha 4                                            | 9.03675 | 2.06E-12 | 5.57457  | 5.37E-10   |



|              |                     |                                                     |         |          |         |            |
|--------------|---------------------|-----------------------------------------------------|---------|----------|---------|------------|
| A_52_P139569 | MFAP3L              | microfibrillar-associated protein 3-like            | 9.16425 | 6.53E-10 | 2.56206 | 0.00056779 |
| A_51_P456114 | CEMIP               | cell migration inducing protein, hyaluronan binding | 9.64992 | 6.02E-17 | 9.82611 | 4.90E-17   |
| A_52_P40363  | GRB10               | growth factor receptor-bound protein 10             | 9.65311 | 7.39E-12 | 2.29928 | 0.000309   |
| A_52_P476535 | Defa3 (includes oth | defensin, alpha, 3                                  | 9.67953 | 3.93E-12 | 13.8213 | 1.22E-13   |
| A_52_P514200 | Defa6               | defensin, alpha, 6                                  | 9.72681 | 1.97E-14 | 18.315  | 3.88E-17   |
| A_51_P246001 | CPE                 | carboxypeptidase E                                  | 9.73693 | 4.01E-22 | 1.89716 | 1.17E-08   |
| A_51_P339540 | Cdkn1c              | cyclin-dependent kinase inhibitor 1C (P57)          | 11.7559 | 3.53E-15 | 1.67406 | 0.00328735 |
| A_52_P665675 | ABCA1               | ATP-binding cassette, sub-family A (ABC1), member 1 | 12.8682 | 1.89E-17 | 6.01804 | 1.40E-13   |
| A_51_P456113 | CEMIP               | cell migration inducing protein, hyaluronan binding | 17.2368 | 1.89E-20 | 16.5852 | 2.72E-20   |

**Appendix Table S3. Increased embryonic lethality of SIRT1 KO embryos (E8.5-E14.5) under the methionine-restricted (MR) diet**

|               |           | WT | Het | KO |
|---------------|-----------|----|-----|----|
| Animal number | Chow diet | 12 | 40  | 17 |
|               | MR diet   | 17 | 40  | 9  |

|       |           |      |      |      |
|-------|-----------|------|------|------|
| Ratio | Chow diet | 0.17 | 0.58 | 0.25 |
|       | MR diet   | 0.26 | 0.61 | 0.14 |

**Appendix Table S4. Neonatal death of SIRT1 KO mice on C57BL/6 background under different maternal diets**

|                                          |                            | <b>WT</b> | <b>Het</b> | <b>KO</b> |
|------------------------------------------|----------------------------|-----------|------------|-----------|
| <b>Chow diet</b>                         | Total pups (survived pups) | 14 (14)   | 25 (25)    | 0 (0)     |
| <b>Met Supplemented diet from E0.5</b>   | Total pups (survived pups) | 17 (17)   | 37 (37)    | 6 (0)     |
| <b>Met Supplemented diet pre-feeding</b> | Total pups (survived pups) | 18 (18)   | 49 (49)    | 7 (7)     |

Newborn pups from mom fed on chow diet (8 litters), Met Supplement diet from E0.5 (10 litters), and Met Supplemented diet pre-feeding (12 litters) were analyzed for their survival from P1.5 to P10.5.
