# Supplementary material
Source: PubMed Central journal article supplement (PMC5666621)

Uncut gels for Figure 3G

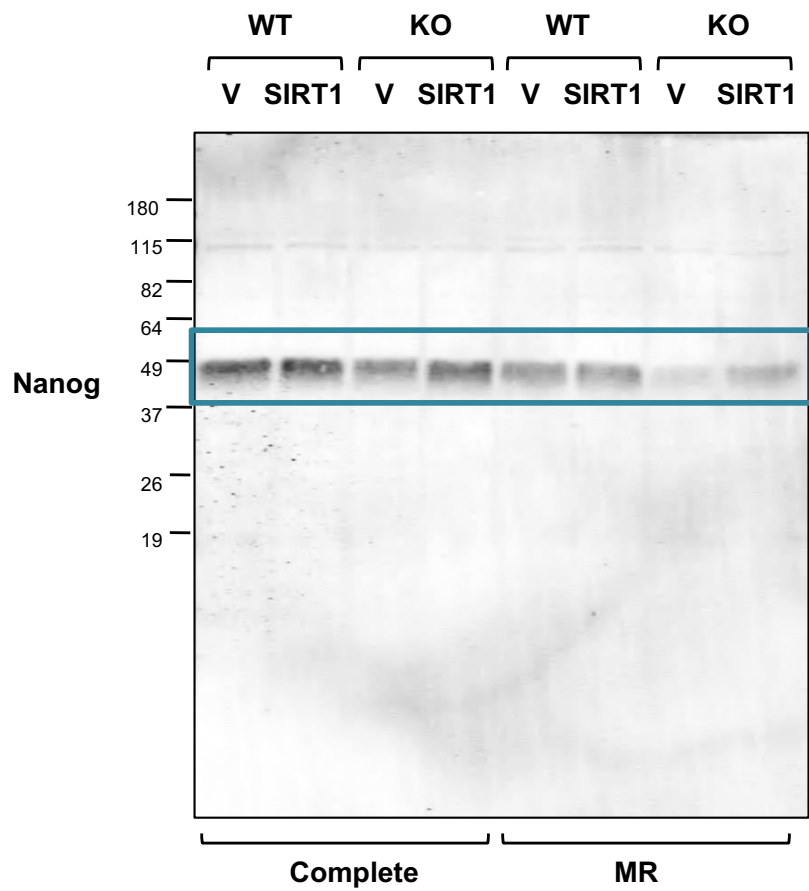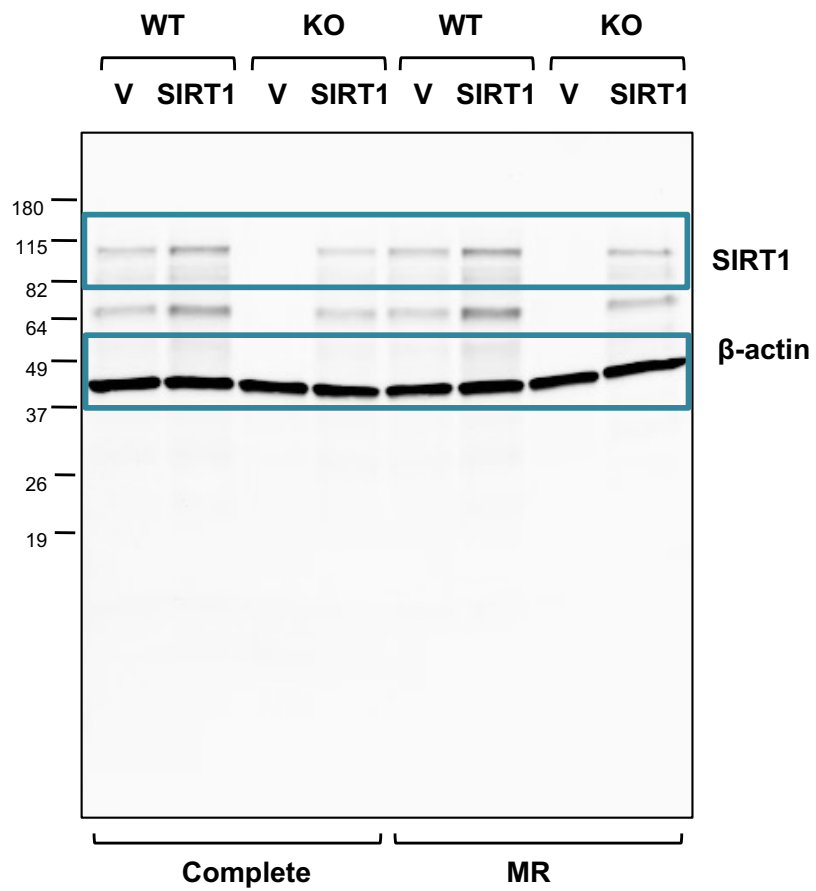

Supplement: EMBJ-36-3175-s005.pdf [file EMBJ-36-3175-s005.pdf]
